# Supplementary material for: Modelling the impact of decidual senescence on embryo implantation in human endometrial assembloids
Source: eLife. 2021 Sep 6;10:e69603. doi: 10.7554/eLife.69603 (PMC8523170; doi:10.7554/eLife.69603)
Supplement: Figure 1—source data 1. — Secretion of PRL and CXCL 14 (pg/ml) was measured by ELISA in spent medium from assembloids. Supports Figure 1D. [file elife-69603-fig1-data1.xlsx]

## Sheet: Figure 1-Source Data 1
Figure 1-Source Data 1: ELISA data to support Figure 1D
Secretion of PRL and CXCL 14 (pg/ml) was measured by ELISA in spent medium from assembloids.
Analyte	Day	Biological replicates (pg/ml)
PRL	0	0	0	0
	2	639.34	1294.14	147.12
	4	3966.48	9876.74	2128.12
CXCL14	0	0	0	0
	2	187.688	61.585	253.886
	4	2058.7	3812.49	3528.76
