# Supplementary material for: Modelling the impact of decidual senescence on embryo implantation in human endometrial assembloids
Source: eLife. 2021 Sep 6;10:e69603. doi: 10.7554/eLife.69603 (PMC8523170; doi:10.7554/eLife.69603)
Supplement: Figure 2—source data 1. — Parallel epithelial gland organoids and assembloids were established from endometrial biopsies and decidualized with 8-bromo-cAMP and MPA for 4 days in either expansion medium (ExM), base medium (BM), or BM with each exogeneous factor added back individually (red). [file elife-69603-fig2-data1.xlsx]

## Sheet: Figure 2-Source Data 1
Figure 2-Source data 1: RTqPCR data
Parallel epithelial gland organoids and assembloids were established from endometrial biopsies and decidualized with 8-bromo-cAMP and MPA for 4 days in either ExM, base medium (BM) or BM with each exogeneous factor added back individually (red).
Gene	Model	Treatment	Biological replicates (RQ [ GOI/L19])
PAEP	Gland organoid	ExM+E2	1	1	1
		ExM+E2+cAMP+MPA	19.0416	5.06777	11.5417
		BM+cAMP+MPA	2.8242		0.779597
		+NAC	2.43259	0.608899	0.811191
		+A83-01	1.46341	0.051745	0.577895
		+Nicotinamide	0.824973	0.305832	0.787594
		+EGF	3.29654	1.32004	1.98788
		+Noggin	1.12233	0.328748	1.3385
		+R-spondin	0.980449	0.601629	1.12419
		+FGF10	0.603324	0.195592	0.227717
		+HGF	1.41548	0.536365	0.231499
	Assembloid	ExM+E2	1	1	1
		ExM+E2+cAMP+MPA	1.76924	14.8586	7.63159
		BM+cAMP+MPA	1.34925		1.57213
		+NAC	3.95569	6.13371	7.14807
		+A83-01	1.08225	0.285715	1.45436
		+Nicotinamide	1.41319	1.5612	1.05884
		+EGF	1.34781	0.693549	4.38695
		+Noggin	1.0291	1.50328	1.59341
		+R-spondin	1.24442	1.72476	2.91865
		+FGF10	1.29823	1.8336	2.04701
		+HGF	0.961328	7.42537	1.21623
SPP1	Gland organoid	ExM+E2	1	1	1
		ExM+E2+cAMP+MPA	12.5334	24.5047	9.89748
		BM+cAMP+MPA	4.46287		0.866599
		+NAC	3.71647	6.33086	0.875711
		+A83-01	1.89251	0.391858	0.56267
		+Nicotinamide	0.896079	34.7688	0.457567
		+EGF	12.778	8.39251	4.06368
		+Noggin	2.21062	1.63911	0.749909
		+R-spondin	3.78409	3.9187	1.1768
		+FGF10	2.6479	2.66612	0.644222
		+HGF	3.00571	3.23228	0.574583
	Assembloid	ExM+E2	1	1	1
		ExM+E2+cAMP+MPA	40.6782	17.1815	34.1693
		BM+cAMP+MPA	10.6799		19.7128
		+NAC	51.137	166.234	125.238
		+A83-01	20.7008	19.4314	26.4553
		+Nicotinamide	63.0482	146.207	178.321
		+EGF	43.7949	49.8335	46.2032
		+Noggin	17.9151	130.528	68.866
		+R-spondin	62.1987	115.138	94.5276
		+FGF10	53.7664	127.096	48.885
		+HGF	26.3424	213.066	31.838
Significance determine by the Friedman test and Dunn’s multiple comparisons post hoc test. Only values of P < 0.05 were considered statistically significant.
