# Supplementary material for: Modelling the impact of decidual senescence on embryo implantation in human endometrial assembloids
Source: eLife. 2021 Sep 6;10:e69603. doi: 10.7554/eLife.69603 (PMC8523170; doi:10.7554/eLife.69603)
Supplement: Figure 3—source data 1. — Population markers were generated in Seurat v3 using FindMarkers on specified comparisons. Supports Figure 3C. [file elife-69603-fig3-data1.xlsx]

## Sheet: Figure 3-Source Data 1
Figure 3-Source Data 1: Epithelial sub-population markers to support Figure 3C
Population markers were generated in Seurat v3 using FindMarkers on specified comparisons.
EpS1 - cell cycle																		EpS2 - proliferative phase																		EpS3 - cilium
(ident.1 = EpS1, ident.2 = c(EpS2,EpS3,EpS4,EpS5), only.pos=TRUE)																		(ident.1 = EpS2, ident.2 = c(EpS4,EpS5), only.pos=TRUE)																		(ident.1 = EpS3, ident.2 = c(,EpS1,EpS2,EpS4,EpS5), only.pos=TRUE)
						Average expression																		Average expression																		Average expression
Gene Name	p_val	avg_logFC	pct.1	pct.2	p_val_adj	EpS1	EpS2	EpS3	EpS4	EpS5	TP	SS1	SS2	SS3	SS4	SS5		Gene Name	p_val	avg_logFC	pct.1	pct.2	p_val_adj	EpS1	EpS2	EpS3	EpS4	EpS5	TP	SS1	SS2	SS3	SS4	SS5		Gene Name	p_val	avg_logFC	pct.1	pct.2	p_val_adj	EpS1	EpS2	EpS3	EpS4	EpS5	TP	SS1	SS2
ACAT2	9.9532e-24	0.5679	0.812	0.635	1.99064e-20	2.39263	1.37112	0.526668	0.553781	1.04418	0.39535	1.86374	0.807064	0.269323	0.736135	0.282392		ABLIM1	5.57592e-06	0.292604	0.768	0.699	0.0111518	1.36387	2.09641	3.03338	1.25101	1.47945	1.04138	0.255189	0.311302	0.271278	0.233174	0.120572		AC007906.2	6.76859e-18	1.75337	0.864	0.453	1.35372e-14	0.0192556	0.284349	5.91548	0.223023	0.0531781	0.141676	0.092576	0.0075346
AKAP12	1.21133e-27	0.691355	0.734	0.455	2.42266e-24	4.75061	2.35032	0.19856	0.935644	3.75171	2.45175	2.05886	1.62304	2.23667	2.03452	2.54266		AC020916.1	6.81442e-31	0.673809	0.848	0.722	1.36288e-27	1.99784	3.85242	2.31855	1.68688	0.873338	2.88642	0.786625	1.14704	1.34402	0.672779	2.18342		ADM	1.01261e-07	0.413668	0.705	0.495	0.000202521	0.147985	0.115399	1.04945	0.477306	0.662895	0.783286	0.374414	0.901149
ANLN	2.44153e-17	0.91304	0.662	0.514	4.88305e-14	2.29381	0.722391	1.07423	0.0512658	0.113814	0.0775792	6.28917	0.175469	0.0939893	0.0416965	0.0149983		AC084866.1	2.65291e-29	0.40555	0.609	0.524	5.30582e-26	0.308615	0.538488	0.0725936	0.0258877	0.0246818	0.00971602	-0.000604633	0.0468877	0.000266103	0.00540713	0.000448651		AGBL2	1.2659e-09	0.838187	0.727	0.52	2.5318e-06	0.0242137	0.0156463	1.37567	0.00650547	0.114106	0.0433779	0.0123137	0.0294903
ANXA1	4.45377e-25	0.661091	0.957	0.89	8.90754e-22	16.456	11.958	17.7567	3.88284	9.76759	4.54122	4.72891	3.34996	2.79527	3.95913	1.10368		ALPP	2.09302e-21	0.406437	0.454	0.175	4.18604e-18	0.218139	0.657399	-0.0116478	0.0801976	0.17045	0.174284	0.0635799	0.0107069	0.00798763	5.37978e-05	0.00170618		AGR3	2.66876e-19	1.64002	0.955	0.638	5.33751e-16	1.11092	1.80157	10.7851	1.05847	0.922965	0.918403	0.0516524	0.174756
ANXA3	2.46201e-17	0.478202	0.807	0.668	4.92403e-14	2.67992	1.76069	0.376402	0.632686	2.19171	0.796997	0.0571056	0.127777	0.0588924	0.0177769	0.132196		ANAPC4	1.24345e-06	0.536414	0.388	0.494	0.00248689	1.21219	1.67977	1.97832	0.651771	0.329351	0.442224	0.333262	0.539651	0.35574	0.22825	0.053668		AK7	7.23838e-10	1.44084	0.773	0.569	1.44768e-06	0.169209	0.109351	4.01615	0.271742	0.131082	0.157405	0.0489882	0.0180832
ARHGAP11A	1.31318e-55	0.805252	0.821	0.571	2.62637e-52	1.72139	0.333423	0.781136	0.160364	0.0439009	0.210046	1.76998	0.165647	0.0682781	0.030865	0.133058		ANLN	2.5108e-25	0.47824	0.621	0.446	5.02161e-22	2.29381	0.722391	1.07423	0.0512658	0.113814	0.0775792	6.28917	0.175469	0.0939893	0.0416965	0.0149983		AK9	4.27487e-13	1.19527	0.795	0.548	8.54974e-10	0.0971991	0.394572	3.10033	0.153794	0.245211	0.276494	0.156259	0.154103
ARL6IP1	1.46024e-14	0.475456	0.879	0.851	2.92049e-11	6.70438	5.18943	1.89425	2.86471	3.61796	2.13093	17.6666	3.22631	2.0544	1.71415	3.39945		ANXA1	5.26154e-31	0.70141	0.941	0.858	1.05231e-27	16.456	11.958	17.7567	3.88284	9.76759	4.54122	4.72891	3.34996	2.79527	3.95913	1.10368		AKAP14	2.19229e-238	0.476702	0.636	0.002	4.38458e-235	0	3.65121e-08	0.610754	0	0	1.82816e-06	8.26976e-06	0.000116291
ASPM	5.57647e-56	1.29525	0.826	0.546	1.11529e-52	4.43754	1.11838	0.148545	0.145409	0.140046	0.377326	7.66397	0.117538	0.0654336	0.0232356	0.00751371		ANXA2	4.24176e-08	0.418481	0.94	0.898	8.48352e-05	11.6841	13.7362	11.7813	6.7292	14.2353	8.9259	4.63381	5.27323	5.60992	6.89784	2.85721		AL357093.2	1.04164e-13	0.543412	0.682	0.337	2.08328e-10	9.30487e-05	6.71387e-05	0.72271	0.000865508	0.00058489	0.0610187	9.07821e-07	1.16496e-05
ATAD2	1.40699e-14	0.63962	0.739	0.649	2.81399e-11	1.90477	0.65853	0.628002	0.426068	0.5447	0.45664	3.63166	0.413091	0.267367	0.332256	0.690259		ANXA3	1.08723e-23	0.301833	0.785	0.608	2.17446e-20	2.67992	1.76069	0.376402	0.632686	2.19171	0.796997	0.0571056	0.127777	0.0588924	0.0177769	0.132196		ANAPC4	3.38305e-06	0.40151	0.773	0.463	0.0067661	1.21219	1.67977	1.97832	0.651771	0.329351	0.442224	0.333262	0.539651
AURKA	1.04639e-27	0.740155	0.705	0.496	2.09278e-24	1.45686	0.34715	0.0857584	0.0673658	0.0993043	0.120861	3.28374	0.0631126	0.0657462	0.0512576	0.0135361		BHLHE41	2.55693e-74	0.618283	0.788	0.545	5.11386e-71	0.514599	1.64038	1.01491	0.365997	0.582724	0.320403	0.06269	0.240258	0.0968761	0.0209205	0.43249		ANKRD37	2.1328e-05	0.426647	0.659	0.563	0.042656	0.30019	0.151259	1.06938	0.484296	0.438535	0.139274	0.0647072	0.113257
AURKB	2.23928e-15	0.61055	0.647	0.582	4.47856e-12	1.02135	0.161156	0.0136858	0.0156048	0.202862	0.0684315	0.665144	0.0421543	0.0074075	0.00353506	0.0015068		BIRC5	1.57221e-27	0.430752	0.69	0.645	3.14441e-24	2.21671	0.70535	0.146472	0.100168	0.13199	0.0805552	5.50363	0.283267	0.0473724	0.0616202	0.0109566		ANKRD66	6.70024e-20	0.86242	0.727	0.277	1.34005e-16	8.84724e-07	1.55836e-05	1.36916	0.00020942	0.00014994	0.00918874	2.0023e-06	9.59225e-05
BIRC5	1.39274e-46	0.890278	0.826	0.661	2.78548e-43	2.21671	0.70535	0.146472	0.100168	0.13199	0.0805552	5.50363	0.283267	0.0473724	0.0616202	0.0109566		BUB1	8.77109e-31	0.316867	0.635	0.5	1.75422e-27	1.65854	0.475856	0.194472	0.0833594	0.0516821	0.0693906	2.46851	0.0987144	0.0373783	0.017082	0.00647244		ANLN	7.55664e-06	0.325956	0.705	0.524	0.0151133	2.29381	0.722391	1.07423	0.0512658	0.113814	0.0775792	6.28917	0.175469
BLM	9.79005e-23	0.448187	0.638	0.472	1.95801e-19	0.752795	0.2968	0.0547146	0.0208777	0.0231559	0.0474418	0.49126	0.111138	0.000572463	8.66523e-05	0.0338716		BUB1B	7.34265e-48	0.29599	0.355	0.636	1.46853e-44	0.920511	0.413615	0.295585	0.0504191	0.0543101	0.132914	1.63253	0.07402	0.000246323	0.00536038	0.000175981		ANXA1	2.44194e-08	0.666742	0.977	0.895	4.88387e-05	16.456	11.958	17.7567	3.88284	9.76759	4.54122	4.72891	3.34996
BRCA1	7.2758e-06	0.462324	0.58	0.598	0.0145516	1.104	0.736536	0.634689	0.0746829	0.0975196	0.167125	1.6607	0.110785	0.0675828	0.0593695	0.00923349		C2orf88	3.06232e-34	0.755999	0.891	0.923	6.12463e-31	14.418	15.1077	4.67186	7.09039	5.0796	2.52495	0.658888	1.08926	0.306495	0.258707	0.400412		ARMC3	6.52651e-23	1.42209	0.932	0.505	1.3053e-19	0.0305687	0.0705191	3.41718	0.0473969	0.127718	0.0797222	0.0184924	0.0119937
BRCA2	3.2795e-21	0.657632	0.609	0.312	6.55901e-18	1.20262	0.269278	0.366736	0.0436504	0.107378	0.160586	1.44307	0.335063	0.0615351	0.0479786	0.0350737		CCDC34	1.1066e-23	0.273141	0.372	0.58	2.2132e-20	1.50541	0.742134	2.25983	0.27718	0.462396	0.286718	2.53843	0.265639	0.250368	0.201304	0.101918		ARMC4	6.17401e-24	0.529548	0.636	0.151	1.2348e-20	0.00791701	6.80424e-05	0.700008	1.39718e-05	0.00192642	0.00296116	0.000387488	0.018974
BRIP1	3.17501e-21	0.341091	0.667	0.576	6.35002e-18	0.469819	0.0900902	0.1973	0.0127345	0.0176744	0.00377534	0.812666	0.0436759	0.00311318	0.00523656	0.0010751		CCN2	1.47067e-13	0.572908	0.615	0.532	2.94133e-10	1.19025	1.7875	3.95961	0.452435	0.907814	0.573945	0.39714	1.41891	0.581929	0.429949	1.2635		BBOF1	5.22062e-20	1.7722	0.909	0.563	1.04412e-16	0.144676	0.251816	6.95331	0.507781	0.261486	0.454749	0.123704	0.162413
BUB1	8.75611e-55	0.779282	0.802	0.548	1.75122e-51	1.65854	0.475856	0.194472	0.0833594	0.0516821	0.0693906	2.46851	0.0987144	0.0373783	0.017082	0.00647244		CCNA1	6.22927e-11	0.499642	0.529	0.394	1.24585e-07	0.888526	0.939188	4.6815	0.140821	0.277286	0.150894	0.052933	0.0632287	0.0177464	0.00779873	0.133426		C11orf16	7.6161e-280	0.319037	0.614	0	1.52322e-276	0	0	0.37807	0.00387636	0	0	0	0
BUB1B	4.51626e-10	0.482797	0.585	0.527	9.03252e-07	0.920511	0.413615	0.295585	0.0504191	0.0543101	0.132914	1.63253	0.07402	0.000246323	0.00536038	0.000175981		CCNB1	1.1823e-64	0.55323	0.722	0.548	2.36459e-61	1.99678	0.96163	0.928119	0.0918709	0.230104	0.114595	3.67991	0.248297	0.156334	0.0665264	0.0588521		C11orf88	2.37391e-178	1.47666	0.636	0.005	4.74783e-175	0	0.000122505	3.37861	7.60259e-05	1.88905e-05	0.0371971	0	0
C2orf88	1.17904e-14	0.379869	0.966	0.91	2.35809e-11	14.418	15.1077	4.67186	7.09039	5.0796	2.52495	0.658888	1.08926	0.306495	0.258707	0.400412		CCND1	1.16657e-44	0.92474	0.918	0.75	2.33314e-41	11.2036	11.8322	2.20482	1.95589	10.0948	2.99433	1.31447	2.34169	0.486128	0.313135	1.63474		C11orf97	2.31494e-25	1.39299	0.841	0.337	4.62988e-22	0.0115698	0.000214062	3.05672	0.010216	0.0124465	0.0243173	0	0
CCDC34	8.92298e-17	0.502245	0.667	0.509	1.7846e-13	1.50541	0.742134	2.25983	0.27718	0.462396	0.286718	2.53843	0.265639	0.250368	0.201304	0.101918		CD69	3.68002e-74	0.301908	0.771	0.589	7.36003e-71	0.376022	0.752302	0.227529	0.279594	0.340886	0.234301	0.00283322	0.0417168	0.0161354	0.00479987	0.0083324		C1orf194	0	1.17057	0.773	0	0	0	0	2.22383	2.48025e-06	0	-6.89642e-05	1.26326e-06	0.00392785
CCN1	1.8286e-09	0.4252	0.778	0.676	3.6572e-06	5.98228	5.5419	2.98327	2.22484	3.13081	2.86224	3.28772	4.40373	5.99345	6.39194	5.02659		CDC20	2.98841e-08	0.261177	0.451	0.554	5.97682e-05	1.26242	0.3831	0.456081	0.0452148	0.12139	0.076815	1.40485	0.0778455	0.0108979	0.00965545	0.0010471		C20orf85	3.88068e-27	1.78421	0.818	0.159	7.76137e-24	-0.000122497	0.00753414	5.0003	0.00226207	0.0278815	0.0900188	0.000375007	0.00491922
CCNA2	1.54539e-47	0.812644	0.754	0.488	3.09078e-44	1.5847	0.362211	0.0103843	0.0254893	0.0405522	0.0318244	1.78718	0.0770968	0.0172205	0.0170348	0.0119653		CDCA3	2.30805e-08	0.31353	0.535	0.439	4.6161e-05	0.502445	0.38583	0.000378814	0.0139126	0.00986443	0.0851089	1.71962	0.0456857	0.00995982	0.0234402	0.00334003		C21orf58	4.97472e-11	1.25173	0.773	0.619	9.94944e-08	0.464316	0.275394	3.05667	0.0292908	0.084763	0.0743288	0.413338	0.0198704
CCNB1	2.04385e-26	0.732246	0.763	0.606	4.08771e-23	1.99678	0.96163	0.928119	0.0918709	0.230104	0.114595	3.67991	0.248297	0.156334	0.0665264	0.0588521		CDK1	1.41668e-07	0.393991	0.442	0.601	0.000283336	2.11383	0.595796	0.931542	0.0811799	0.0619591	0.0792586	3.10603	0.0733533	0.0339801	0.0315652	0.011487		C2orf50	8.96406e-12	0.626998	0.727	0.487	1.79281e-08	0.00246903	0.0317211	0.894031	0.00201007	0.00207845	0.00372188	6.54133e-05	0.00145449
CCNB2	5.74601e-16	0.574156	0.594	0.441	1.1492e-12	0.934849	0.182479	0.137457	0.0341867	0.0384494	0.0516763	1.47942	0.0565744	0.0156043	0.00812745	0.132374		CENPF	3.98608e-13	1.22168	0.638	0.649	7.97217e-10	13.01	4.68599	4.20623	0.505831	1.15437	1.16743	17.3627	1.09489	0.214593	0.195404	0.104961		C5AR1	8.09481e-10	0.682176	0.705	0.433	1.61896e-06	0.000449694	0.00163085	1.02169	0.0415476	0.0248578	0.0825348	0.0206158	0.0187021
CCND1	8.74116e-19	0.449153	0.918	0.81	1.74823e-15	11.2036	11.8322	2.20482	1.95589	10.0948	2.99433	1.31447	2.34169	0.486128	0.313135	1.63474		CEP128	8.68177e-48	0.287812	0.681	0.524	1.73635e-44	0.497563	0.406182	1.10084	0.0420155	0.0896307	0.104107	0.394713	0.0352277	0.0835021	0.0661491	0.00711614		C5orf49	2.55362e-20	1.83476	0.886	0.573	5.10723e-17	0.0431378	0.0581302	5.58869	0.0544237	0.0368777	0.0177332	0.000717383	0.00733086
CCNF	9.04775e-06	0.264322	0.56	0.536	0.0180955	0.407672	0.110475	0.106302	0.038414	0.131822	0.0419769	0.561763	0.0609415	0.037617	0.0207612	0.124462		CEP55	4.89115e-26	0.497159	0.695	0.597	9.7823e-23	3.46545	0.924038	0.070218	0.152817	0.219533	0.205268	4.62416	0.218444	0.0412191	0.0620043	0.0665265		C6orf118	1.19519e-45	1.87431	0.864	0.13	2.39038e-42	0.01496	0.0200918	5.60146	8.68252e-05	0.0331849	0.0306475	0.0717565	0.0179237
CDC20	1.79103e-36	0.645502	0.715	0.521	3.58206e-33	1.26242	0.3831	0.456081	0.0452148	0.12139	0.076815	1.40485	0.0778455	0.0108979	0.00965545	0.0010471		CEP78	1.66203e-49	0.471657	0.742	0.568	3.32407e-46	1.0119	1.1164	2.32998	0.329921	0.294223	0.648688	0.705148	0.384681	0.104533	0.127407	0.11885		C9orf135	6.66283e-20	0.776661	0.727	0.277	1.33257e-16	8.84724e-07	1.3228e-05	1.17442	0.000187481	0.000124448	0.00533656	3.64326e-07	7.24632e-07
CDC45	3.50584e-10	0.327983	0.551	0.458	7.01167e-07	0.433376	0.0593806	-0.000396611	0.021045	0.0114631	0.00532929	0.263853	0.0341102	6.98774e-05	0.00153411	0.00217501		CEP83	4.64578e-19	0.3119	0.634	0.567	9.29157e-16	0.250689	0.459426	3.05009	0.0804224	0.034488	0.0888542	0.328332	0.317488	0.139046	0.197202	0.0983493		C9orf24	1.23999e-16	2.06892	0.818	0.55	2.47999e-13	0.0038589	0.0138814	7.22816	0.0611508	0.0561699	0.0383181	0.000245061	0.00130136
CDC6	2.81992e-15	0.482622	0.58	0.378	5.63984e-12	0.716352	0.119508	0.0138893	0.00983329	0.0742128	0.00927593	0.523904	0.160944	0.0112313	0.0012068	0.00596783		CFTR	1.66304e-06	0.526406	0.767	0.755	0.00332607	2.48284	3.13871	1.31675	1.75036	0.585036	1.27944	0.198596	0.162995	0.190728	0.0800906	0.0792735		CAPS	2.33935e-24	1.99562	1	0.732	4.67871e-21	2.97444	3.28116	22.2318	1.62069	0.715498	0.876077	0.170635	0.3545
CDCA2	4.09681e-50	0.665723	0.744	0.385	8.19361e-47	1.07492	0.143805	0.00323579	0.00960136	0.0667448	0.0402664	1.78315	0.0836914	0.0643268	0.00868021	0.0210073		CIP2A	3.6084e-07	0.266347	0.432	0.567	0.00072168	0.773782	0.441213	0.91528	0.100104	0.1158	0.135365	1.92689	0.0674926	0.0267827	0.0219893	0.0121628		CAPSL	9.59587e-200	1.84882	0.795	0.001	1.91917e-196	0	-0.000186561	5.36139	0.00188278	0.0045359	5.43644e-06	-6.01554e-05	0.00639998
CDCA5	2.90429e-31	0.448223	0.681	0.524	5.80859e-28	0.658027	0.123216	0.107637	0.0123883	0.0451033	0.0166955	0.854429	0.0886401	0.00309341	0.00781655	-0.000769315		CKS2	6.18986e-36	0.444828	0.754	0.555	1.23797e-32	3.68256	1.18541	1.18234	0.372121	0.481158	0.312865	3.51865	0.529877	0.280209	0.293908	0.446379		CASC1	3.1144e-16	1.18029	0.841	0.522	6.22879e-13	0.0613359	0.059776	2.49253	0.0883076	0.0651602	0.0472197	0.00183895	6.39676e-05
CDK1	3.28675e-54	0.889684	0.812	0.541	6.5735e-51	2.11383	0.595796	0.931542	0.0811799	0.0619591	0.0792586	3.10603	0.0733533	0.0339801	0.0315652	0.011487		CLDN10	2.79986e-21	0.354723	0.848	0.703	5.59972e-18	1.52049	3.61564	1.78419	1.98559	2.94553	1.22797	0.647764	0.405621	0.179568	0.16559	0.0665194		CC2D2A	2.04181e-10	0.965042	0.773	0.434	4.08361e-07	0.18383	0.157153	2.06557	0.158599	0.206998	0.223897	0.088708	0.221522
CDKN3	1.90912e-18	0.792371	0.647	0.546	3.81824e-15	1.59199	0.400264	0.0566034	0.0365005	0.0847067	0.0435465	3.37982	0.169145	0.0538173	0.0647157	0.0270509		CLSPN	2.11687e-29	0.522602	0.589	0.43	4.23373e-26	3.30413	0.78591	0.0293064	0.0310595	0.137634	0.183	2.63579	0.372189	0.0280374	0.045096	0.0160984		CCDC113	1.47806e-24	1.6271	0.955	0.406	2.95612e-21	0.101382	0.098318	4.5291	0.0872962	0.0488498	0.0833775	0.0125546	0.0210709
CENPA	2.28324e-32	0.315171	0.662	0.436	4.56647e-29	0.425427	0.101557	0.0333488	0.00566668	0.00482247	0.0214377	0.588289	0.0563159	0.000693699	0.00555194	0.00135258		CMTM6	1.97565e-44	0.978899	0.843	0.72	3.95129e-41	6.97303	8.62264	4.85535	2.40786	3.19971	2.85986	2.24012	2.5481	0.987301	1.24357	0.990433		CCDC146	2.25609e-08	0.547491	0.977	0.81	4.51219e-05	4.19641	4.4527	7.04292	3.02448	3.33646	2.2755	0.303382	0.432893
CENPE	4.98012e-16	1.11764	0.671	0.586	9.96024e-13	3.82427	1.10301	0.49619	0.326304	0.160017	0.406809	7.38865	0.339521	0.158088	0.144477	-0.0189948		COBL	7.3112e-31	0.306117	0.754	0.625	1.46224e-27	0.724335	0.818125	1.34447	0.317661	0.397856	0.393178	0.00210507	0.0436638	0.0255788	0.0111735	0.133375		CCDC17	5.16887e-13	1.05104	0.773	0.555	1.03377e-09	0.0337213	0.0340519	1.93773	0.0286008	0.00259112	0.0826174	0.027344	0.0109325
CENPF	1.15525e-46	1.48485	0.855	0.648	2.31051e-43	13.01	4.68599	4.20623	0.505831	1.15437	1.16743	17.3627	1.09489	0.214593	0.195404	0.104961		COL1A2	9.4217e-46	1.21062	0.916	0.848	1.88434e-42	4.6662	17.358	4.20644	5.41723	1.80764	9.5535	16.7026	22.2369	29.919	28.924	13.6944		CCDC170	1.0015e-21	2.05305	0.932	0.616	2.003e-18	0.207393	0.182472	8.01595	0.140721	0.116269	0.578373	0.999914	0.919945
CENPK	2.67229e-41	0.445776	0.734	0.446	5.34458e-38	0.797726	0.315241	0.580093	0.0354189	0.0632042	0.0220663	1.69802	0.125545	0.0290589	0.022094	0.059608		CPM	5.6843e-163	1.80129	0.918	0.584	1.13686e-159	5.87089	10.1695	1.56753	0.580985	1.5839	0.520502	0.214706	0.513871	0.132142	0.0529713	0.00240277		CCDC171	3.18443e-08	0.574425	0.705	0.582	6.36887e-05	0.316289	0.169858	1.01101	0.0783859	0.0845376	0.107301	0.158207	0.101618
CENPM	3.20227e-19	0.380736	0.686	0.616	6.40454e-16	0.708359	0.189675	0.697548	0.135535	0.136786	0.0800885	0.742413	0.0520804	0.0065059	0.00662679	0.0561354		CXADR	7.58591e-22	0.505209	0.824	0.643	1.51718e-18	2.1332	2.57997	1.15301	1.20064	1.04593	1.07519	0.206886	0.198648	0.20734	0.10234	0.228873		CCDC173	2.0888e-18	1.32519	0.773	0.344	4.1776e-15	0.0011144	0.0156719	2.81194	0.013589	0.0133983	0.0215511	0.00123075	0.0153321
CENPU	1.94921e-58	0.977795	0.841	0.541	3.89843e-55	2.44936	0.597253	1.42465	0.0824108	0.100228	0.140001	3.90376	0.155783	0.0176085	0.076826	0.0319984		DCBLD1	8.42946e-32	0.261708	0.392	0.607	1.68589e-28	0.526297	0.665087	0.407794	0.324901	0.160037	1.16889	4.50152	4.65642	3.2533	2.45464	5.70828		CCDC181	2.66169e-23	1.11522	0.795	0.224	5.32338e-20	-0.000558147	0.012261	2.07894	0.00545107	0.0207477	0.000340907	0.0284201	0.0296929
CENPW	3.19938e-08	0.368838	0.614	0.566	6.39876e-05	0.869755	0.484686	0.689442	0.147769	0.232924	0.257036	3.58715	0.222211	1.32121	0.672098	1.11479		DCBLD2	2.63542e-18	0.51414	0.793	0.657	5.27084e-15	3.20559	2.72059	1.34331	0.684137	2.74699	1.22096	3.14993	2.35052	1.62639	1.70515	1.28462		CCDC189	3.0205e-12	0.40113	0.75	0.495	6.041e-09	0.289564	0.0296895	0.590199	0.0504674	0.0366691	0.0373518	0.0162169	0.0162984
CEP295	1.92661e-17	0.396282	0.778	0.654	3.85321e-14	1.33852	0.810917	0.695156	0.452821	0.38212	0.744081	1.0528	0.423351	0.374113	0.248003	0.65618		DCDC2	1.81058e-18	0.890873	0.807	0.732	3.62116e-15	4.93905	6.19638	2.32944	1.84502	2.25556	1.77871	0.157959	0.352723	0.0691265	0.070824	0.20151		CCDC30	2.06724e-12	1.10512	0.795	0.57	4.13449e-09	0.122139	0.139323	2.5522	0.252456	0.077248	0.233041	0.077467	0.11813
CEP55	7.48874e-46	1.13532	0.816	0.63	1.49775e-42	3.46545	0.924038	0.070218	0.152817	0.219533	0.205268	4.62416	0.218444	0.0412191	0.0620043	0.0665265		DIAPH3	7.9308e-17	0.279044	0.356	0.506	1.58616e-13	1.5048	0.499997	0.0236827	0.0822279	0.282592	0.131369	3.40661	0.153342	0.0173721	0.0203602	0.0325575		CCDC34	1.98872e-07	0.726728	0.727	0.52	0.000397744	1.50541	0.742134	2.25983	0.27718	0.462396	0.286718	2.53843	0.265639
CHAF1A	2.20448e-26	0.733104	0.696	0.503	4.40895e-23	1.68698	0.437522	0.349717	0.174488	0.292993	0.277454	1.0973	0.175586	0.0566252	0.04967	0.105811		DLGAP5	4.63669e-54	0.61834	0.72	0.528	9.27338e-51	3.2584	0.985143	0.519832	0.0525724	0.11779	0.238282	6.51217	0.176045	0.0126328	0.0276898	0.00157623		CCDC65	4.67229e-30	1.06402	0.841	0.238	9.34457e-27	2.30821e-05	0.015299	1.91682	0.00348348	8.4351e-05	0.0456626	0.000363441	0.00516775
CHEK1	1.30599e-25	0.775127	0.681	0.506	2.61198e-22	1.51844	0.317942	0.0437201	0.0595734	0.117327	0.04815	0.967697	0.275071	0.225616	0.352263	0.0538942		DMKN	9.77898e-36	0.790221	0.813	0.636	1.9558e-32	4.00402	4.42407	3.59265	1.40631	1.61546	1.20716	0.59927	0.32445	0.183243	0.154776	0.292924		CCDC81	2.60015e-15	0.803636	0.795	0.477	5.2003e-12	0.00286406	0.0379999	1.26935	0.00651022	0.00340271	0.092184	0.00944729	0.0170173
CIP2A	9.72769e-14	0.356747	0.618	0.513	1.94554e-10	0.773782	0.441213	0.91528	0.100104	0.1158	0.135365	1.92689	0.0674926	0.0267827	0.0219893	0.0121628		DNMT1	4.4541e-10	0.498512	0.754	0.666	8.9082e-07	3.91577	2.56087	1.71369	1.17923	1.1173	1.23784	2.89616	1.11581	0.68419	0.607199	0.215798		CCN2	7.44946e-10	0.893707	0.818	0.562	1.48989e-06	1.19025	1.7875	3.95961	0.452435	0.907814	0.573945	0.39714	1.41891
CKAP2	1.97615e-20	0.601076	0.744	0.619	3.95231e-17	1.80614	0.751811	0.643475	0.399249	0.453766	0.430808	6.01174	0.693894	0.232007	0.258289	0.149212		DUSP6	8.10769e-09	0.632016	0.781	0.713	1.62154e-05	2.10141	2.71119	1.19572	1.08349	0.660416	0.661519	2.17272	3.4772	0.457005	0.176824	2.39808		CCNA1	1.65949e-19	1.33519	0.932	0.458	3.31899e-16	0.888526	0.939188	4.6815	0.140821	0.277286	0.150894	0.052933	0.0632287
CKS1B	8.4059e-42	0.514877	0.792	0.558	1.68118e-38	1.02727	0.27023	0.218551	0.147891	0.262111	0.133352	1.26682	0.179015	0.0964907	0.0672753	0.0756386		ECI2	1.15384e-28	1.11349	0.773	0.724	2.30767e-25	2.65971	4.16876	1.77534	0.793759	0.42652	0.539447	1.06988	0.963519	0.57313	0.662913	0.850574		CCNO	9.9328e-08	1.24809	0.659	0.501	0.000198656	0.110364	0.0336429	2.67056	0.0490194	0.0735934	0.0154138	-0.000211823	0.0055724
CKS2	1.4001e-51	1.01566	0.894	0.63	2.80019e-48	3.68256	1.18541	1.18234	0.372121	0.481158	0.312865	3.51865	0.529877	0.280209	0.293908	0.446379		EGR3	2.72063e-41	1.09542	0.734	0.657	5.44126e-38	1.59141	3.09058	0.410419	0.417619	0.227937	0.661021	0.456368	0.778672	0.629809	0.429023	0.968633		CCP110	8.37318e-08	1.08047	0.75	0.609	0.000167464	0.777525	0.683951	3.46139	0.393713	0.318181	0.557032	1.70046	0.404343
CLSPN	4.09155e-19	1.18527	0.657	0.491	8.1831e-16	3.30413	0.78591	0.0293064	0.0310595	0.137634	0.183	2.63579	0.372189	0.0280374	0.045096	0.0160984		ELOVL5	8.15954e-17	0.63871	0.765	0.736	1.63191e-13	2.34154	2.64189	1.37798	0.950273	0.845565	2.20361	5.07764	2.94165	4.19229	13.3017	1.59766		CDC20B	5.4209e-55	1.35278	0.705	0.024	1.08418e-51	0.00969409	0.0309036	2.91103	1.6869e-05	0.000217393	-5.38995e-06	-5.08622e-05	-2.50218e-05
CMTM6	3.48716e-15	0.319682	0.894	0.768	6.97433e-12	6.97303	8.62264	4.85535	2.40786	3.19971	2.85986	2.24012	2.5481	0.987301	1.24357	0.990433		ELOVL6	1.44002e-10	0.530637	0.71	0.623	2.88004e-07	1.23209	1.38729	0.56795	0.225561	0.907221	0.511649	1.10232	0.812625	0.289753	0.624169	0.0979818		CDHR3	1.62742e-18	1.36645	0.818	0.417	3.25485e-15	0.0093181	0.0049311	2.97972	0.0148093	0.0401006	0.101152	0.0171615	0.0128116
COTL1	9.41536e-13	0.34768	0.652	0.54	1.88307e-09	0.972654	0.543856	0.323932	0.211422	0.588997	0.457484	1.52349	1.97532	1.62703	1.53296	1.03664		EMP1	1.22581e-20	0.406862	0.815	0.688	2.45162e-17	2.93358	2.85213	1.26522	0.700802	3.99516	2.20177	7.96323	9.82017	4.40701	3.74027	6.6069		CDHR4	1.66664e-09	0.525085	0.636	0.361	3.33328e-06	6.72389e-05	0.000487319	0.693229	0.00329145	-7.8968e-05	0.00773811	9.89878e-05	0.00564957
CPM	4.53791e-21	0.286244	0.879	0.706	9.07581e-18	5.87089	10.1695	1.56753	0.580985	1.5839	0.520502	0.214706	0.513871	0.132142	0.0529713	0.00240277		ERRFI1	2.01617e-05	0.446067	0.857	0.836	0.0403233	3.63834	6.34765	1.81397	4.55961	1.29435	3.23893	0.76069	0.760663	1.05452	0.602038	0.435903		CDKL1	3.92396e-13	0.480386	0.75	0.491	7.84791e-10	0.0105608	0.0343543	0.671967	0.0497819	0.0050726	0.0427776	0.0790066	0.0627041
DCBLD2	1.43141e-19	0.422293	0.845	0.707	2.86282e-16	3.20559	2.72059	1.34331	0.684137	2.74699	1.22096	3.14993	2.35052	1.62639	1.70515	1.28462		EYA2	1.90394e-06	0.676947	0.745	0.748	0.00380788	2.03653	2.97674	0.509686	1.15892	0.632261	0.444175	0.059293	0.130228	0.0796755	0.0558546	0.00476107		CDKN1A	9.77161e-18	1.07914	0.955	0.548	1.95432e-14	0.652986	0.705016	5.70115	1.37705	2.63742	1.87404	1.99299	1.08461
DCDC2	6.37501e-10	0.285726	0.826	0.758	1.275e-06	4.93905	6.19638	2.32944	1.84502	2.25556	1.77871	0.157959	0.352723	0.0691265	0.070824	0.20151		FAM111B	2.80852e-79	0.28036	0.652	0.265	5.61704e-76	1.55914	0.351853	1.2743	0.0141267	0.0416421	0.0347182	1.54079	0.176582	0.000330401	0.00184625	-0.000396293		CDKN2A	1.35978e-08	0.442546	0.682	0.435	2.71957e-05	0.0676951	0.244753	0.840021	0.0983182	0.355135	0.239954	0.880809	0.452663
DEPDC1	1.74621e-28	0.600368	0.614	0.296	3.49243e-25	1.03121	0.250651	0.416337	0.0228137	0.0358032	0.0565309	3.17431	0.0779256	0.0505981	0.00192786	0.0153343		FDFT1	2.1989e-14	0.618041	0.771	0.697	4.39781e-11	3.43558	3.79155	1.51841	1.29203	2.4005	1.28957	1.77807	1.43227	0.641829	1.02067	0.324515		CDKN2D	2.31762e-06	0.552795	0.682	0.556	0.00463525	0.375977	0.21903	1.27727	0.364025	0.313905	0.188444	0.854672	0.173262
DEPDC1B	2.98936e-16	0.555601	0.643	0.484	5.97873e-13	1.15281	0.330112	0.132042	0.134118	0.327859	0.136492	0.307948	0.0432059	0.0138246	0.00469021	-0.00382489		FDPS	5.82399e-33	0.74732	0.913	0.831	1.1648e-29	7.74731	6.88513	2.62189	2.48353	3.44143	2.14915	2.59801	2.8839	1.47581	1.87723	1.36434		CDS1	7.40193e-09	0.854901	0.841	0.615	1.48039e-05	0.800195	0.820419	3.84878	1.16581	1.46246	0.800051	0.0505522	0.0391442
DIAPH3	8.14338e-39	0.685868	0.729	0.449	1.62868e-35	1.5048	0.499997	0.0236827	0.0822279	0.282592	0.131369	3.40661	0.153342	0.0173721	0.0203602	0.0325575		FGFBP1	2.34297e-08	0.426528	0.704	0.655	4.68594e-05	3.03697	3.90741	1.32879	1.10241	5.30191	1.11705	0.269553	0.369947	0.13006	0.0385265	0.219767		CENPM	3.80448e-06	0.339486	0.682	0.622	0.00760896	0.708359	0.189675	0.697548	0.135535	0.136786	0.0800885	0.742413	0.0520804
DLGAP5	3.94935e-54	1.10978	0.831	0.598	7.8987e-51	3.2584	0.985143	0.519832	0.0525724	0.11779	0.238282	6.51217	0.176045	0.0126328	0.0276898	0.00157623		FOSB	8.19025e-08	0.719945	0.931	0.914	0.000163805	7.82902	14.0078	8.3094	6.54382	5.63475	8.02214	4.55797	6.84742	5.22098	4.04616	11.4447		CEP126	7.41484e-15	1.13002	0.818	0.591	1.48297e-11	0.0668404	0.181167	2.38348	0.0525886	0.0324329	0.323876	0.291289	0.219421
DMKN	1.7529e-18	0.341246	0.889	0.704	3.5058e-15	4.00402	4.42407	3.59265	1.40631	1.61546	1.20716	0.59927	0.32445	0.183243	0.154776	0.292924		FOXA2	7.32304e-15	0.284893	0.614	0.491	1.46461e-11	0.450159	0.625207	1.04619	0.247527	0.151343	0.108682	0.0264797	0.0158895	0.00234054	0.0016546	6.59209e-05		CEP162	1.13592e-05	0.797673	0.773	0.635	0.0227184	0.522452	0.559244	2.14623	0.349694	0.230926	0.324972	0.321963	0.236873
DNMT1	2.07341e-24	0.610369	0.874	0.696	4.14682e-21	3.91577	2.56087	1.71369	1.17923	1.1173	1.23784	2.89616	1.11581	0.68419	0.607199	0.215798		GATA2	4.62606e-06	0.75826	0.72	0.699	0.00925211	2.1773	3.4473	1.49355	1.224	0.688013	1.39648	0.421692	0.803624	0.467961	0.628925	0.42031		CEP83	1.87109e-18	1.20492	0.886	0.576	3.74218e-15	0.250689	0.459426	3.05009	0.0804224	0.034488	0.0888542	0.328332	0.317488
DTL	4.97513e-21	0.443852	0.681	0.535	9.95027e-18	0.644768	0.136705	0.0497143	0.000883192	0.0325335	0.00294444	0.442963	0.0683826	0.0023423	0.0155671	0.000461362		GJA1	2.38495e-13	0.266656	0.635	0.616	4.7699e-10	0.374008	0.85101	0.275408	0.410321	0.438683	1.14121	3.22249	7.01755	6.08244	4.53464	9.29746		CFAP126	7.01739e-23	0.8668	0.818	0.363	1.40348e-19	0.000972527	0.00707749	1.38793	0.00266803	0.000599351	0.0209918	0.00448775	0.001889
E2F8	4.7205e-36	0.565115	0.681	0.433	9.441e-33	0.886903	0.131753	0.108836	0.0274308	0.0650367	0.0491971	0.368535	0.0821252	0.0137907	0.00297528	0.00923342		GJA4	4.21878e-46	0.818303	0.589	0.265	8.43755e-43	0.91435	1.28922	0.391339	0.00170479	0.0331851	0.0108463	0.0712725	0.0779474	0.00275286	0.00154695	0.00379221		CFAP157	9.74861e-26	1.47284	0.909	0.374	1.94972e-22	-2.54798e-05	0.031177	3.54684	0.02552	0.141801	0.0450975	4.25057e-05	5.5067e-05
ECT2	5.14064e-23	0.676089	0.763	0.563	1.02813e-19	2.29803	0.770524	1.45517	0.612752	0.551768	0.586539	1.80802	0.28643	0.151836	0.0898662	0.153743		GMNN	1.16374e-32	0.818001	0.754	0.64	2.32747e-29	4.70884	3.09571	0.945736	0.911547	0.514653	0.562797	3.41	0.965342	0.344585	0.284329	0.671826		CFAP161	3.52006e-23	0.698641	0.727	0.226	7.04011e-20	0.026615	3.36031e-07	1.01997	0.00420836	0.000573987	0.0158887	0.000174834	0.00336937
ELOVL5	5.26459e-10	0.273722	0.831	0.747	1.05292e-06	2.34154	2.64189	1.37798	0.950273	0.845565	2.20361	5.07764	2.94165	4.19229	13.3017	1.59766		GPX3	2.99739e-48	0.358476	0.795	0.6	5.99477e-45	1.51774	1.98619	0.622309	0.939736	1.49981	0.566525	0.102759	0.292577	0.0766103	0.0840056	0.194316		CFAP298	2.51583e-15	1.37342	0.909	0.747	5.03165e-12	1.23093	1.7292	8.45361	1.25866	1.15417	1.40167	1.05503	1.00739
EMP1	1.49651e-09	0.26643	0.807	0.732	2.99302e-06	2.93358	2.85213	1.26522	0.700802	3.99516	2.20177	7.96323	9.82017	4.40701	3.74027	6.6069		GREB1	7.69255e-09	0.328197	0.468	0.646	1.53851e-05	0.290659	0.544986	0.380293	0.12624	0.074714	0.152014	0.167127	0.625552	0.0715045	0.0541582	0.100464		CFAP299	3.86068e-115	0.438317	0.614	0.007	7.72136e-112	-2.35452e-05	7.90583e-07	0.552303	0.00183382	0.00427544	0.0174515	0.0106389	-0.00064347
ESCO2	1.05566e-28	0.751148	0.691	0.551	2.11131e-25	1.36851	0.238394	0.127291	0.0207132	0.127059	0.0527487	1.67515	0.0344607	0.00292394	0.00380432	0.0156197		H2AZ1	1.41039e-13	0.590914	0.886	0.738	2.82078e-10	9.57587	4.8254	2.46589	2.18033	2.35541	2.18401	10.8293	2.37969	1.15357	0.798317	3.32059		CFAP300	3.91034e-10	1.07588	0.727	0.516	7.82068e-07	0.00986224	0.0533209	2.01144	0.0112534	0.0246409	0.0111887	0.0124784	0.060873
EZH2	8.18618e-45	0.546965	0.783	0.471	1.63724e-41	1.42313	0.595839	0.560132	0.270894	0.331598	0.476296	1.84864	0.216565	0.0781204	0.0755506	0.66719		HELLS	1.61728e-09	0.398962	0.343	0.468	3.23456e-06	2.25701	0.599262	0.974046	0.0662367	0.0925292	0.0747494	3.11979	0.329014	0.0351488	0.0538716	0.159259		CFAP43	6.58544e-13	1.40979	0.795	0.545	1.31709e-09	0.0117059	0.182911	3.40664	0.023541	0.0339902	0.252467	0.00629101	0.0211787
FADS1	4.8906e-14	0.413829	0.816	0.77	9.78119e-11	3.5262	2.96812	1.09145	1.42489	1.60027	3.04866	9.49889	6.04573	7.23083	8.03107	6.64999		HLA-DMB	2.53297e-09	0.294409	0.641	0.514	5.06595e-06	1.2298	1.69201	0.384363	1.13576	0.638816	0.525549	0.0985074	0.127047	0.170759	0.058144	0.0474563		CFAP45	3.69279e-22	2.43519	0.909	0.481	7.38558e-19	0.0421209	0.0733867	11.2086	0.0795171	0.048699	0.0771473	0.0237779	0.0012154
FAM111A	1.22361e-29	0.555482	0.821	0.64	2.44722e-26	1.64829	0.777625	0.135448	0.401712	0.345175	0.778788	2.81269	0.695375	0.350654	0.400394	0.273871		HMGA1	9.18878e-42	0.820842	0.896	0.708	1.83776e-38	6.52863	5.5574	1.04829	1.29671	3.54307	1.72675	1.31863	1.59494	0.292716	0.125914	1.88378		CFAP52	8.92098e-291	0.906788	0.75	0.002	1.7842e-287	0.0174025	0	1.48057	0	9.5583e-05	0.00587355	7.64402e-08	0
FAM111B	1.85277e-50	0.785894	0.783	0.413	3.70554e-47	1.55914	0.351853	1.2743	0.0141267	0.0416421	0.0347182	1.54079	0.176582	0.000330401	0.00184625	-0.000396293		HMGB2	3.09053e-07	0.475814	0.605	0.716	0.000618106	11.5254	2.14196	1.39648	1.05638	0.659591	1.10546	14.0037	1.12044	0.737625	0.664351	0.867906		CFAP53	4.49849e-16	1.64933	0.864	0.557	8.99698e-13	0.0545725	0.186349	4.78384	0.0848266	0.0612872	0.177334	0.0623196	0.045949
FAM83D	6.47539e-38	0.2772	0.676	0.459	1.29508e-34	0.356575	0.0622866	0.00796726	0.00709251	0.0162939	0.01104	0.517915	0.0145339	0.00511036	0.00135598	2.13855e-05		HMMR	4.93669e-19	0.726434	0.622	0.574	9.87337e-16	4.80782	1.35641	0.511642	0.142525	0.131489	0.217831	7.01563	0.288209	0.0355908	0.0309589	0.0097039		CFAP57	1.77522e-22	1.42076	0.932	0.639	3.55045e-19	0.0177905	0.0236854	3.25357	0.0228933	0.0540812	0.0890588	0.000169089	0.00369795
FANCD2	3.99497e-18	0.433675	0.633	0.515	7.98994e-15	0.731598	0.201838	0.0108291	0.100518	0.0265869	0.0359476	0.787028	0.0225759	0.00429021	0.0140127	0.0182144		HSPA2	7.42589e-45	0.391108	0.814	0.701	1.48518e-41	1.71744	1.86277	0.889145	1.05472	0.602313	0.905493	1.86618	3.57	1.79828	1.72103	2.72886		CFAP70	2.0292e-15	1.29451	0.864	0.63	4.05839e-12	0.0554012	0.305113	3.23093	0.0999988	0.0779284	0.232215	0.0749522	0.0989186
FANCI	1.09787e-25	0.771645	0.7	0.524	2.19573e-22	1.66448	0.413609	0.176648	0.135338	0.116491	0.105402	1.90654	0.128737	0.0579247	0.071378	0.149105		HSPH1	2.1338e-06	0.480307	0.81	0.735	0.00426759	4.38819	4.12426	13.2402	1.95462	2.77549	2.72027	2.63414	2.16854	0.747409	1.10976	0.982985		CFH	5.72607e-11	0.37263	0.773	0.538	1.14521e-07	0.0599193	0.407014	0.811892	0.199415	0.162789	0.472557	2.11531	2.95206
FBXO5	7.97027e-26	0.518971	0.657	0.469	1.59405e-22	0.877364	0.165229	0.382546	0.0868568	0.0629974	0.068549	1.09019	0.13259	0.0659366	0.0652708	0.0814768		ID3	2.32273e-94	0.286302	0.757	0.658	4.64545e-91	0.518156	0.461348	0.106749	0.120639	0.0324721	0.112567	0.0576103	0.0341019	0.0449006	0.00292028	0.328288		CITED2	2.04396e-09	0.817972	0.886	0.709	4.08792e-06	0.710033	1.08517	4.31778	1.63913	1.49887	0.919521	1.97241	3.32218
FDFT1	8.02601e-14	0.276826	0.826	0.726	1.6052e-10	3.43558	3.79155	1.51841	1.29203	2.4005	1.28957	1.77807	1.43227	0.641829	1.02067	0.324515		ID4	1.38992e-31	0.521044	0.797	0.681	2.77984e-28	1.72947	1.61688	0.951779	0.56522	0.523045	0.389027	1.89539	1.25863	1.36054	2.88289	0.568645		CLCA4	7.50684e-06	0.697725	0.477	0.159	0.0150137	0.0146287	0.0305818	1.03283	1.68232e-07	0.00237561	6.47712e-08	0.0146607	2.89348e-07
FDPS	6.86601e-29	0.519875	0.961	0.86	1.3732e-25	7.74731	6.88513	2.62189	2.48353	3.44143	2.14915	2.59801	2.8839	1.47581	1.87723	1.36434		IDI1	9.69973e-06	0.37826	0.758	0.721	0.0193995	2.51633	2.38962	1.30929	1.21041	1.63629	0.896793	2.69829	1.85187	1.119	1.68954	0.482184		CLU	2.61371e-06	0.486577	0.886	0.746	0.00522741	1.17983	2.40179	4.44476	2.81614	1.65642	2.05565	1.16157	1.69641
FEN1	1.94252e-22	0.786919	0.715	0.566	3.88503e-19	1.71988	0.408716	0.0798807	0.137358	0.174639	0.0985928	1.77473	0.239906	0.082478	0.0351292	0.0554164		INHBB	2.07604e-27	1.04387	0.655	0.543	4.15207e-24	2.76244	3.1605	0.954414	0.359402	0.76165	0.433857	0.194715	0.362363	0.0193571	0.00410391	0.159207		CNTRL	1.84891e-06	0.983106	0.682	0.562	0.00369782	0.605093	0.37273	2.36529	0.163288	0.06119	0.189617	1.32269	0.139286
FOXM1	2.08092e-16	0.373757	0.609	0.467	4.16184e-13	0.570752	0.189632	0.103439	0.0151368	0.0276199	0.0155166	1.60565	0.144209	0.0368264	0.0422595	0.0113195		INSIG1	2.50102e-19	0.503895	0.765	0.628	5.00205e-16	2.58884	3.00802	1.81309	1.41746	1.43303	0.947116	2.57065	1.73008	0.860919	1.1634	1.11056		COBL	1.23238e-06	0.424982	0.795	0.671	0.00246475	0.724335	0.818125	1.34447	0.317661	0.397856	0.393178	0.00210507	0.0436638
GINS2	4.71866e-07	0.503068	0.527	0.431	0.000943732	0.801467	0.163316	0.00753302	0.00988812	0.163736	0.0268595	0.639495	0.116031	0.0112577	0.0362991	0.00211621		ITGA6	7.06444e-14	0.783767	0.867	0.873	1.41289e-10	5.97104	8.68123	2.36069	3.35468	3.6086	1.99202	1.03801	0.667387	0.226234	0.122619	0.130017		CST6	1.02143e-16	0.484817	0.705	0.239	2.04287e-13	0.0342172	0.00683369	0.719714	0.00766965	0.332343	0.0696801	-0.000243374	0.00525714
GINS4	3.47326e-17	0.299598	0.691	0.641	6.94652e-14	0.560285	0.327587	0.0515189	0.0580124	0.0768195	0.0362127	0.602282	0.139059	0.0180144	0.00297391	0.0131655		ITIH5	5.61534e-08	0.332531	0.777	0.712	0.000112307	1.66443	1.89548	0.852658	0.936263	1.47065	0.825106	0.126813	0.198859	0.123898	0.045963	0.177111		CTSL	4.25024e-06	0.356822	0.795	0.734	0.00850047	0.694921	0.948382	1.57633	0.681148	0.901668	1.63982	8.80426	11.0796
GJA4	5.09407e-10	0.263288	0.58	0.39	1.01881e-06	0.91435	1.28922	0.391339	0.00170479	0.0331851	0.0108463	0.0712725	0.0779474	0.00275286	0.00154695	0.00379221		KIAA0040	1.09624e-59	0.521176	0.783	0.571	2.19249e-56	1.20959	1.58507	0.544318	0.381565	0.96708	0.403931	0.166654	0.211057	0.165565	0.224293	0.0219607		CTSS	3.25885e-06	0.685469	0.727	0.529	0.00651771	0.123972	0.179304	2.01693	0.619623	1.23133	0.684987	0.204659	0.140523
GLA	3.05444e-06	0.295422	0.638	0.557	0.00610887	1.37107	1.51038	0.561313	0.277736	0.548455	0.395147	1.0766	0.496792	0.473735	1.01433	0.2193		KIF15	1.25899e-40	0.284564	0.66	0.558	2.51798e-37	1.01488	0.362208	0.72034	0.0232749	0.0292697	0.0551336	1.44489	0.041111	0.00882411	0.00758321	-0.0211539		DEUP1	3.10134e-240	0.380059	0.591	0	6.20269e-237	0	0	0.463511	0.00183382	0	0.0121947	0	0
GMNN	1.53168e-31	0.778678	0.865	0.684	3.06336e-28	4.70884	3.09571	0.945736	0.911547	0.514653	0.562797	3.41	0.965342	0.344585	0.284329	0.671826		KIF20B	5.34428e-09	0.575571	0.641	0.586	1.06886e-05	3.30733	1.25383	0.788332	0.268326	0.26524	0.464796	5.7857	0.35248	0.134471	0.10889	0.0204709		DHRS9	1.0714e-27	0.926147	0.614	0.098	2.1428e-24	1.32466e-05	2.11072e-06	1.56144	-2.88714e-05	0.0962215	0.0222756	0	0
GTSE1	2.81465e-50	0.63556	0.763	0.473	5.6293e-47	1.13994	0.304034	0.113954	0.0357374	0.0415937	0.0975534	1.54956	0.0817123	0.0196763	0.0124475	0.0102562		KLK10	5.81473e-36	0.594483	0.74	0.537	1.16295e-32	3.36368	2.63436	0.511799	0.222066	3.2107	0.882676	0.257303	0.301083	0.118369	0.024604	0.0911373		DNAAF1	3.72007e-18	2.11202	0.841	0.531	7.44015e-15	0.0199977	0.0145264	7.66196	0.0640042	0.0935931	0.166224	1.44895e-05	0.00352761
H1-3	9.64353e-34	0.474823	0.754	0.493	1.92871e-30	0.840356	0.117274	0.122788	0.183357	0.0982014	0.161418	0.639075	0.0917538	0.0377598	0.0406015	0.10821		KLK11	2.41363e-48	0.829604	0.804	0.696	4.82726e-45	2.52398	3.20638	0.983093	0.457323	1.89756	0.900069	0.104509	0.114406	0.0798177	0.0217922	0.0780634		DNAAF4	2.66678e-07	0.353638	0.682	0.571	0.000533355	0.0342912	0.0452031	0.461351	0.0187497	-9.06952e-05	0.00430519	0.000452011	0.0174801
H2AZ1	1.53566e-47	0.935111	0.966	0.792	3.07132e-44	9.57587	4.8254	2.46589	2.18033	2.35541	2.18401	10.8293	2.37969	1.15357	0.798317	3.32059		KNL1	8.13934e-12	0.268002	0.585	0.513	1.62787e-08	1.40088	0.352494	0.353536	0.0299214	0.0475056	0.203456	3.61854	0.154892	0.00566069	0.0111803	0.000604218		DNAH10	1.83092e-16	0.767784	0.773	0.409	3.66185e-13	0.000490385	0.00783977	1.16655	0.00627012	0.00059039	0.0305806	0.0255007	0.00568344
H4C3	2.00729e-30	1.05996	0.957	0.828	4.01457e-27	11.728	4.01731	1.50787	3.44637	2.2516	2.40548	6.32541	1.39656	0.740603	0.512936	0.991708		KRT13	7.87269e-55	0.646509	0.712	0.572	1.57454e-51	1.49888	1.79497	1.2728	0.0995667	1.49039	0.249376	0.0871305	0.151061	0.0177738	0.00677901	0.0159416		DNAH12	9.88541e-25	1.8329	0.818	0.251	1.97708e-21	9.1762e-05	0.000104199	5.33318	0.00222207	0.0794319	0.0876789	0.0257932	0.0107155
HELLS	3.86408e-26	0.93441	0.667	0.424	7.72816e-23	2.25701	0.599262	0.974046	0.0662367	0.0925292	0.0747494	3.11979	0.329014	0.0351488	0.0538716	0.159259		KRT23	9.11618e-26	0.35857	0.677	0.601	1.82324e-22	1.09348	1.25692	0.228361	0.186153	1.67638	0.263191	0.150385	0.25375	0.388495	0.247174	0.235928		DNAH3	8.10812e-10	0.454307	0.705	0.535	1.62162e-06	0.0017721	0.00794077	0.61061	0.0104955	0.101453	0.0538687	1.26591e-06	9.61906e-07
HES6	3.18449e-18	0.355109	0.758	0.698	6.36897e-15	1.06054	0.569819	2.51789	0.308522	0.274383	0.164941	0.242301	0.224209	0.0752609	0.042471	0.0351268		LAMB1	4.66589e-19	0.891481	0.827	0.757	9.33178e-16	2.35246	5.37138	3.1266	1.72116	1.30697	6.58511	16.2006	19.8623	21.3798	15.4042	15.9191		DNAH5	8.11203e-07	0.823248	0.773	0.672	0.00162241	0.0351908	0.192449	2.07674	0.605901	0.17717	0.624835	0.000892618	0.0166925
HJURP	4.52089e-44	0.692249	0.749	0.506	9.04178e-41	1.16978	0.137572	0.0051172	0.05234	0.0793003	0.110905	1.39538	0.0506457	0.0114633	0.0038339	0.000888857		LAMC2	1.05858e-16	0.563361	0.78	0.668	2.11716e-13	2.81266	3.66653	1.77952	0.974639	3.57587	2.64941	0.105501	0.218918	0.10826	0.0653076	0.380084		DNAH6	1.40208e-11	0.672304	0.727	0.49	2.80416e-08	0.0280461	0.0102952	1.00166	0.0174343	0.0556913	0.0221602	0.00103907	0.0107122
HMGA1	3.54633e-27	0.591634	0.908	0.775	7.09266e-24	6.52863	5.5574	1.04829	1.29671	3.54307	1.72675	1.31863	1.59494	0.292716	0.125914	1.88378		LBH	1.1689e-33	0.275688	0.639	0.378	2.33779e-30	0.161543	0.54565	0.748042	0.118312	0.327763	0.387257	1.25268	1.88972	0.628736	0.480002	0.439466		DNAH7	4.77191e-13	0.830944	0.773	0.529	9.54381e-10	0.0694312	0.13697	1.50784	0.0702285	0.0738013	0.113886	-6.08255e-05	0.0307336
HMGB2	1.48804e-64	1.65929	0.913	0.677	2.97607e-61	11.5254	2.14196	1.39648	1.05638	0.659591	1.10546	14.0037	1.12044	0.737625	0.664351	0.867906		LCP1	2.27689e-05	0.416279	0.358	0.452	0.0455379	0.451242	0.816685	0.022461	0.167389	0.284515	0.844199	1.1646	1.60522	2.18326	2.80054	1.55403		DNAI1	2.3802e-302	0.519647	0.682	0.001	4.7604e-299	0	0	0.683636	0.00227436	0.00226795	0.0339507	0	0
HMGN2	1.61548e-48	0.981413	0.942	0.733	3.23097e-45	6.83478	3.16865	1.29361	1.38902	0.897284	1.05327	8.67625	2.01744	1.44416	1.36885	0.822176		LIMA1	1.07245e-07	0.477492	0.886	0.876	0.00021449	7.03979	9.37882	4.59746	4.54683	7.94738	5.17306	1.92781	2.82115	1.25746	1.80134	0.8159		DNALI1	7.96065e-20	1.56138	0.932	0.625	1.59213e-16	0.263889	0.408675	5.38411	0.301668	0.34594	0.278647	0.211585	0.298947
HMMR	2.58607e-32	1.30269	0.758	0.594	5.17213e-29	4.80782	1.35641	0.511642	0.142525	0.131489	0.217831	7.01563	0.288209	0.0355908	0.0309589	0.0097039		LINC00472	7.28903e-07	0.33969	0.745	0.643	0.00145781	0.704099	1.87185	1.6585	1.25401	0.455784	1.64921	0.105941	0.15538	0.0672703	0.0877203	0.205595		DRC1	2.06838e-24	1.87375	0.886	0.424	4.13676e-21	0.00602438	0.106221	5.82912	0.0212434	0.0281379	0.0688802	0.000372896	0.00509356
HSPH1	9.59228e-09	0.271228	0.816	0.766	1.91846e-05	4.38819	4.12426	13.2402	1.95462	2.77549	2.72027	2.63414	2.16854	0.747409	1.10976	0.982985		LINC02762	4.90482e-27	0.382792	0.575	0.435	9.80964e-24	0.36681	0.529499	0.19661	0.0246466	0.0948366	0.0902022	0.0859012	0.0520576	0.064121	0.0747657	0.0132432		DRC3	8.10044e-14	1.00937	0.795	0.558	1.62009e-10	0.0168995	0.0405306	1.79465	0.00434018	0.011744	0.0814611	3.58595e-05	0.00696084
ID4	3.97145e-14	0.341861	0.802	0.724	7.94291e-11	1.72947	1.61688	0.951779	0.56522	0.523045	0.389027	1.89539	1.25863	1.36054	2.88289	0.568645		LMNB1	2.42249e-05	0.376976	0.585	0.558	0.0484498	1.54167	0.641079	0.0958491	0.136428	0.0953947	0.111283	1.19699	0.0974497	0.016318	0.0229185	0.00131506		DTHD1	2.41852e-09	1.35093	0.705	0.525	4.83705e-06	0.00892967	0.0413949	2.92948	0.00700824	0.0023473	0.117683	3.84017e-05	0.000290338
IDI1	1.12065e-05	0.264308	0.729	0.734	0.0224131	2.51633	2.38962	1.30929	1.21041	1.63629	0.896793	2.69829	1.85187	1.119	1.68954	0.482184		LONRF2	4.32038e-33	0.737518	0.793	0.729	8.64077e-30	1.49256	2.10086	0.907997	0.561347	0.26305	1.7624	2.58452	4.15232	2.33149	1.38604	2.82859		DUOX1	3.91304e-09	0.53511	0.75	0.578	7.82607e-06	0.0778164	0.294309	1.3849	0.67356	0.0428792	0.418277	0.0386463	0.00517791
INHBB	1.78903e-11	0.43725	0.71	0.588	3.57805e-08	2.76244	3.1605	0.954414	0.359402	0.76165	0.433857	0.194715	0.362363	0.0193571	0.00410391	0.159207		LRIG1	1.9802e-10	0.714699	0.684	0.748	3.96041e-07	2.15647	2.80471	0.583976	1.05441	0.319742	1.04262	0.349247	0.439309	0.261115	0.103431	0.530567		DYDC2	7.62537e-15	0.995777	0.818	0.471	1.52507e-11	0.0996572	0.0480712	1.8614	0.032056	0.119874	0.207245	0.00192439	0.009792
KIF11	1.75551e-32	0.95642	0.715	0.453	3.51102e-29	2.04835	0.325033	0.0657498	0.0980561	0.0595892	0.0822975	3.62724	0.0520802	0.100008	0.0604877	0.00403528		MAOB	1.67073e-67	0.252529	0.753	0.679	3.34146e-64	0.292791	0.649646	0.261354	0.317657	0.179745	0.753563	2.22167	1.79558	4.1538	5.76246	1.58542		DYNLRB2	1.76221e-16	1.19947	0.818	0.467	3.52443e-13	0.0093446	0.0181271	2.41876	0.0468221	0.0233015	0.0191107	-3.97679e-05	-0.00172398
KIF14	2.62757e-36	1.14135	0.715	0.494	5.25513e-33	2.80473	0.403191	0.874396	0.0531883	0.17443	0.247438	5.29728	0.181055	0.0243189	0.0396215	0.0587346		MCM4	1.64545e-23	0.321835	0.687	0.532	3.2909e-20	1.41865	0.620886	0.0300046	0.17444	0.175994	0.165753	0.947593	0.195338	0.0413226	0.0777843	0.13466		DZIP3	4.59299e-08	1.22555	0.727	0.615	9.18598e-05	0.560737	0.332957	3.44345	0.282992	0.139745	0.308805	0.644552	0.386378
KIF15	6.72634e-19	0.552362	0.671	0.595	1.34527e-15	1.01488	0.362208	0.72034	0.0232749	0.0292697	0.0551336	1.44489	0.041111	0.00882411	0.00758321	-0.0211539		MCM6	2.12552e-23	0.399234	0.708	0.64	4.25104e-20	1.88769	0.698241	0.0825367	0.123021	0.184874	0.117305	0.894846	0.491497	0.0761681	0.133253	0.0639511		EFCAB1	2.46859e-15	1.05468	0.659	0.166	4.93718e-12	0.000264404	0.0313098	1.90127	-5.17746e-05	0.00189648	0.00508417	0.0143055	0.0200877
KIF18A	1.77522e-11	0.61018	0.58	0.447	3.55044e-08	1.21435	0.398635	0.27331	0.0635984	0.162069	0.17054	1.74328	0.0761135	0.0670056	0.00390544	0.000841988		MFAP4	4.39581e-83	0.736812	0.805	0.673	8.79163e-80	0.447819	1.65908	1.02843	0.250071	0.336511	2.60787	19.392	36.2808	12.2277	12.0351	9.97439		EFCAB10	1.14756e-64	0.857767	0.636	0.034	2.29512e-61	0.00461538	-0.000109035	1.36471	0.00429275	0.0043459	0.0623946	0.00310406	0.0054032
KIF20A	1.17588e-09	0.274747	0.517	0.356	2.35175e-06	0.367471	0.0835661	0.0361765	0.0110659	0.0212831	0.000613623	2.28639	0.0574697	0.00688786	0.00621112	0.006938		MGLL	3.10871e-16	0.345114	0.775	0.593	6.21742e-13	0.62758	2.12898	4.08051	1.1734	1.33494	1.1413	2.94065	3.91307	1.73988	1.91674	6.09578		EFHB	2.79154e-18	0.512473	0.682	0.253	5.58307e-15	2.5575e-05	4.4866e-05	0.679253	0.0132089	0.00172526	3.55964e-05	1.21431e-05	2.23547e-05
KIF20B	7.1802e-34	0.972844	0.807	0.608	1.43604e-30	3.30733	1.25383	0.788332	0.268326	0.26524	0.464796	5.7857	0.35248	0.134471	0.10889	0.0204709		MMP26	8.85165e-30	0.344484	0.561	0.306	1.77033e-26	0.352378	0.546674	0.288799	0.0946841	0.0995178	0.0237542	0.00442856	0.0525574	0.0125442	0.00322543	0.000193233		EFHC1	2.04367e-20	1.54122	0.909	0.548	4.08733e-17	0.171358	0.232688	4.6779	0.232415	0.160629	0.243038	0.160213	0.176816
KIF23	2.9616e-72	1.03799	0.812	0.293	5.9232e-69	2.39559	0.492098	0.176711	0.0284271	0.0697931	0.156721	3.27865	0.22739	0.0513875	0.0506894	0.182356		MMP7	6.36403e-119	1.03705	0.954	0.739	1.27281e-115	69.2563	58.4968	15.689	8.194	53.5743	10.377	3.46278	7.13311	1.60781	0.45681	1.83826		EFHC2	5.82421e-17	0.964017	0.864	0.575	1.16484e-13	0.0230621	0.211852	1.89444	0.0682819	0.0217756	0.0335692	0.0540036	0.065521
KIF2C	2.84876e-17	0.382997	0.618	0.486	5.69752e-14	0.610687	0.160704	0.105222	0.0696074	0.0423853	0.0865627	2.08894	0.0245568	0.0183991	0.00998057	0.0125047		MSX1	2.10985e-10	0.412843	0.883	0.916	4.21971e-07	10.873	10.873	3.47482	8.41038	2.48606	4.35296	0.558423	0.852785	0.361784	0.243683	0.254105		ENKUR	3.67417e-27	2.03749	0.955	0.457	7.34834e-24	0.0158341	0.0614436	6.98792	0.0109141	0.0993217	0.0715493	0.0189341	0.0492386
KIFC1	3.22891e-52	0.642921	0.773	0.579	6.45783e-49	1.02555	0.118461	0.0148556	0.0389059	0.0292282	0.0305196	1.19636	0.0340646	0.00293667	0.00384515	0.00173372		NASP	9.83058e-06	0.611782	0.764	0.796	0.0196612	6.27339	4.81066	2.84397	2.38154	1.50452	2.44381	7.31965	3.23636	1.32368	1.27093	0.953115		ERICH2	7.86422e-10	0.339453	0.636	0.367	1.57284e-06	0.0223246	0.0150379	0.442668	0.0441529	0.0103235	0.00386349	0.0153498	0.0248255
KLK10	6.05778e-11	0.528995	0.725	0.611	1.21156e-07	3.36368	2.63436	0.511799	0.222066	3.2107	0.882676	0.257303	0.301083	0.118369	0.024604	0.0911373		NCAPG	2.48299e-18	0.260425	0.595	0.525	4.96599e-15	2.47003	0.337391	0.196987	0.0367032	0.0140344	0.0427152	3.74347	0.178947	0.0259209	0.0584684	0.0262843		ERICH3	2.75301e-22	2.0386	0.909	0.572	5.50602e-19	0.0524368	0.316017	7.71783	0.0228659	0.112788	0.160329	0.00743535	0.0241716
KLK11	9.29331e-20	0.274694	0.865	0.735	1.85866e-16	2.52398	3.20638	0.983093	0.457323	1.89756	0.900069	0.104509	0.114406	0.0798177	0.0217922	0.0780634		NDC80	1.09038e-11	0.293922	0.598	0.595	2.18077e-08	2.68234	0.412252	0.371724	0.0506233	0.0581631	0.0439887	4.11692	0.0554	0.11626	0.0749584	0.0170089		FAM111B	5.25375e-09	0.576151	0.75	0.442	1.05075e-05	1.55914	0.351853	1.2743	0.0141267	0.0416421	0.0347182	1.54079	0.176582
KNL1	3.88618e-29	0.732453	0.691	0.541	7.77236e-26	1.40088	0.352494	0.353536	0.0299214	0.0475056	0.203456	3.61854	0.154892	0.00566069	0.0111803	0.000604218		NRP1	4.5612e-53	0.524593	0.206	0.459	9.1224e-50	0.637652	0.854909	0.198415	0.0748401	0.162137	0.109229	0.639525	0.801734	0.529981	0.595737	0.536911		FAM183A	4.06683e-26	2.03132	0.932	0.461	8.13366e-23	0.0149823	0.0310114	6.82879	0.0197246	0.0454308	0.0954892	0.00161481	0.0116034
KPNA2	1.05289e-13	0.446072	0.768	0.664	2.10578e-10	1.97282	1.08426	0.652747	0.84507	0.70795	0.510837	2.72482	0.361239	0.256493	0.190896	0.126345		NSG1	2.00116e-13	0.282212	0.634	0.538	4.00232e-10	0.357957	0.566213	0.0989031	0.189289	0.158065	0.250558	0.150465	0.106222	1.17007	0.896457	0.39918		FAM216B	1.5003e-12	1.46526	0.705	0.355	3.00059e-09	2.54274e-05	0.000153365	3.39105	0.0319398	0.00518745	0.0292964	3.98252e-06	0.000229862
LIG1	5.9939e-14	0.55226	0.671	0.65	1.19878e-10	1.09401	0.290538	0.177458	0.163591	0.142701	0.284873	0.569738	0.133348	0.0202377	0.0256862	0.0992657		NUF2	4.60756e-10	0.314372	0.559	0.453	9.21512e-07	1.84223	0.490699	0.469853	0.0832417	0.103598	0.215828	4.1511	0.124488	0.0285058	0.0302893	-0.0169934		FAM81B	6.26205e-19	1.50382	0.773	0.304	1.25241e-15	0.010353	0.0041296	3.55285	0.00774424	0.0420792	0.00115295	-9.36415e-06	0.00152347
LMNB1	5.12173e-31	0.664764	0.734	0.568	1.02435e-27	1.54167	0.641079	0.0958491	0.136428	0.0953947	0.111283	1.19699	0.0974497	0.016318	0.0229185	0.00131506		ODC1	2.00145e-17	0.587542	0.807	0.734	4.0029e-14	3.25989	3.59082	3.46385	1.48522	1.73642	1.50548	1.20732	0.818727	0.639116	0.957207	0.470996		FAM92B	2.15793e-26	1.38769	0.818	0.271	4.31586e-23	0.000908039	0.0123857	3.0272	0.00291623	0.000147495	0.0502864	0.0114657	1.50569e-06
LMNB2	1.17084e-27	0.333001	0.744	0.591	2.34169e-24	0.887643	0.549999	0.372847	0.23772	0.248432	0.256913	1.14833	0.269592	0.0601659	0.144271	0.00228091		OLFM4	7.9267e-207	2.10336	0.893	0.535	1.58534e-203	4.54828	7.95605	0.298747	0.0727188	0.150249	0.160036	0.646293	0.850431	0.0352585	0.00210305	0.0377331		FANK1	1.23118e-14	1.35817	0.841	0.543	2.46236e-11	0.0382861	0.133286	3.53649	0.169441	0.312083	0.282352	0.00107739	0.05373
LRRCC1	7.46539e-07	0.350941	0.618	0.605	0.00149308	0.81684	0.458975	1.30745	0.145952	0.124469	0.0636461	0.925511	0.271722	0.209417	0.247358	0.0759559		ORC6	3.04005e-14	0.260423	0.614	0.523	6.0801e-11	0.983496	0.47989	0.699262	0.130141	0.169991	0.0827467	2.65007	0.18769	0.269156	0.185477	0.218176		FHAD1	1.54263e-20	1.69697	0.932	0.63	3.08526e-17	0.127015	0.116149	6.62967	0.731853	0.242349	0.989887	0.013908	0.00083769
MAD2L1	4.08267e-28	0.726206	0.725	0.579	8.16535e-25	1.38218	0.20611	0.231661	0.100978	0.169817	0.0644943	2.43863	0.208319	0.0368666	0.0342118	0.00885488		OSBPL3	3.63753e-14	0.294267	0.474	0.628	7.27506e-11	1.03203	1.46119	1.48166	0.721334	1.15022	0.861911	0.256187	0.118392	0.106472	0.0308025	0.122719		FNIP2	2.3069e-08	0.274367	0.75	0.526	4.6138e-05	0.225915	0.174507	0.720423	0.473646	0.180766	0.637569	0.170993	0.113109
MASTL	1.59462e-34	0.68088	0.802	0.609	3.18925e-31	1.48937	0.378285	0.23113	0.180746	0.231278	0.308724	2.37103	0.330181	0.269083	0.223629	0.0390193		PADI1	4.43757e-14	0.251829	0.662	0.545	8.87515e-11	0.817655	1.01402	0.368814	0.17001	1.67909	0.848105	0.0311461	0.0636574	0.0403384	0.00198875	0.140281		FOXJ1	2.82901e-27	2.84286	0.977	0.61	5.65802e-24	0.323698	0.530552	22.7312	0.341089	0.216701	0.374029	0.0475927	0.080968
MCM10	1.89384e-15	0.651977	0.609	0.501	3.78768e-12	1.1023	0.25824	-0.00234015	0.00671842	0.00545246	0.0158732	0.818064	0.0783564	0.00265162	0.0203431	0.0142554		PASK	4.34138e-26	0.251111	0.569	0.488	8.68276e-23	0.125465	0.303786	0.253118	0.0178474	0.00417279	0.0991148	0.0358866	0.0465255	0.00137774	4.87611e-05	0.00970568		GALM	1.46534e-07	0.443142	0.75	0.597	0.000293067	0.250834	0.342499	1.04008	0.280458	0.359154	0.21341	0.113949	0.0849043
MCM3	5.04973e-20	0.755702	0.739	0.574	1.00995e-16	2.51114	1.20514	0.210099	0.339895	0.375839	0.263771	1.6963	0.52901	0.113809	0.20992	0.13668		PCLAF	4.33355e-15	0.411069	0.535	0.446	8.66711e-12	2.29562	0.645187	0.176114	0.0851384	0.106206	0.00767545	3.47781	0.366951	0.0940542	0.0387843	0.0313332		GLUL	8.52294e-10	0.688906	0.955	0.751	1.70459e-06	1.20277	2.18449	5.00126	2.11306	1.88205	2.04483	6.37813	7.55357
MCM4	1.90818e-18	0.598417	0.705	0.587	3.81635e-15	1.41865	0.620886	0.0300046	0.17444	0.175994	0.165753	0.947593	0.195338	0.0413226	0.0777843	0.13466		PDGFRB	4.1716e-23	0.547063	0.725	0.635	8.34321e-20	0.343977	1.113	0.361527	0.258763	0.12114	1.58827	14.1131	22.3293	8.94444	5.52785	13.5096		H2AC8	8.38186e-06	0.7816	0.091	0.316	0.0167637	0.000551093	0.0126481	1.21125	0.0166035	0.00516996	0.0267304	0.000458784	0.0145747
MCM5	9.37167e-15	0.391115	0.643	0.564	1.87433e-11	0.639349	0.218841	0.0154373	0.0401763	0.0758659	0.025654	0.386935	0.0819916	0.00624052	0.0407013	-0.00398396		PEG10	9.36791e-44	0.691707	0.807	0.679	1.87358e-40	1.7357	2.06596	0.394412	0.606207	0.33532	0.405517	0.453164	0.140234	0.241157	0.238445	0.310919		H2BC8	4.78519e-08	0.44147	0.591	0.283	9.57039e-05	0.108935	0.106739	0.682261	0.0244333	0.172188	0.0567665	0.11874	0.0938528
MCM6	2.43437e-14	0.770914	0.71	0.664	4.86875e-11	1.88769	0.698241	0.0825367	0.123021	0.184874	0.117305	0.894846	0.491497	0.0761681	0.133253	0.0639511		PGR	1.57758e-125	1.10689	0.84	0.671	3.15515e-122	1.82079	2.64215	0.564224	0.234048	0.119584	0.366092	1.81534	2.93553	0.506872	0.579798	0.324707		HMGB3	1.19562e-05	0.628244	0.841	0.655	0.0239124	1.72842	1.43525	3.56302	1.71304	0.460626	0.471982	1.72401	0.35313
MELK	2.01453e-26	0.690418	0.71	0.571	4.02905e-23	1.32149	0.26448	0.638284	0.0802734	0.117067	0.140725	1.90423	0.0664231	0.063842	0.0393479	-0.00106821		PHLDA1	1.10343e-24	0.455325	0.621	0.447	2.20686e-21	1.06291	1.13808	0.805493	0.118999	1.0232	0.873721	3.36076	5.03325	1.37038	0.860427	7.9337		HSP90AA1	1.61469e-08	0.840034	1	0.975	3.22938e-05	31.7322	26.9734	58.2078	21.7228	22.7239	33.7917	25.7384	17.8211
MKI67	3.60244e-71	1.50957	0.918	0.571	7.20487e-68	9.60885	3.03333	0.486082	0.494013	0.200852	0.524485	13.8051	0.588071	0.126741	0.1191	0.0204275		PLA2G4A	1.06335e-45	0.605293	0.73	0.569	2.12669e-42	0.845175	1.6723	0.290795	0.464788	0.442131	0.40411	0.209987	0.0863556	0.0371458	0.0219008	0.0240679		HSPH1	1.25114e-12	1.26389	0.932	0.767	2.50229e-09	4.38819	4.12426	13.2402	1.95462	2.77549	2.72027	2.63414	2.16854
MMP7	8.04026e-32	0.708701	0.952	0.817	1.60805e-28	69.2563	58.4968	15.689	8.194	53.5743	10.377	3.46278	7.13311	1.60781	0.45681	1.83826		PLAT	5.59948e-68	0.406222	0.704	0.473	1.1199e-64	0.178628	0.639639	0.218111	0.0627234	0.175403	0.74921	5.58765	12.1202	1.43936	0.810707	3.93608		HYDIN	4.03602e-24	0.876253	0.773	0.185	8.07203e-21	0.0161818	0.0186659	1.43218	0.0107794	0.00239062	0.0630778	7.93514e-05	0.00162416
MNS1	8.09048e-14	0.514789	0.667	0.602	1.6181e-10	1.40444	0.444338	9.77177	0.0971205	0.105763	0.140525	0.491368	0.0470251	0.0170123	0.0487077	0.0502877		PODXL	3.2143e-10	0.703514	0.774	0.769	6.42859e-07	2.45483	6.57569	0.930072	2.41816	3.67922	2.19071	0.882399	1.74005	0.680351	0.896129	0.529168		IFT74	5.60275e-14	1.24855	0.932	0.782	1.12055e-10	2.11714	1.71597	7.3755	1.16585	0.936142	0.624904	2.01167	1.11335
MSX1	5.67638e-13	0.254727	0.976	0.903	1.13528e-09	10.873	10.873	3.47482	8.41038	2.48606	4.35296	0.558423	0.852785	0.361784	0.243683	0.254105		PPA1	4.48251e-06	0.542161	0.85	0.773	0.00896502	3.64019	4.70204	1.08246	2.63355	1.42114	2.16825	1.09145	0.941537	0.551289	0.622481	0.235902		IGFBP7	1.1365e-10	1.52713	0.818	0.621	2.27301e-07	0.179965	0.603261	6.59585	0.769748	0.712081	0.999364	3.31943	5.41663
NASP	1.90643e-30	0.571254	0.903	0.787	3.81286e-27	6.27339	4.81066	2.84397	2.38154	1.50452	2.44381	7.31965	3.23636	1.32368	1.27093	0.953115		PRR15	6.45085e-103	1.20909	0.815	0.588	1.29017e-99	1.73758	3.54534	1.3079	0.334963	0.417627	0.216921	0.0768137	0.287667	0.0479946	0.0429536	0.0206496		INTU	1.09766e-12	0.899255	0.818	0.578	2.19533e-09	0.336309	0.403481	2.40415	0.394687	0.349316	0.446973	0.182629	0.199462
NCAPG	1.00939e-54	1.11052	0.802	0.545	2.01879e-51	2.47003	0.337391	0.196987	0.0367032	0.0140344	0.0427152	3.74347	0.178947	0.0259209	0.0584684	0.0262843		PSIP1	7.64367e-14	0.386357	0.529	0.761	1.52873e-10	3.72138	2.25309	7.36343	1.24728	1.10725	2.2402	6.77531	2.05191	1.44839	1.28253	0.685482		IQCG	1.11857e-18	2.00861	0.886	0.543	2.23714e-15	0.135767	0.250326	8.02923	0.213261	0.171049	0.545722	0.237837	0.215538
NCAPG2	6.19752e-13	0.536631	0.623	0.556	1.2395e-09	1.01654	0.384904	0.0088393	0.0737625	0.0533616	0.112397	2.44575	0.156031	0.0774314	0.0704053	0.179367		RAB31	6.3414e-56	0.418981	0.753	0.601	1.26828e-52	0.384686	0.940189	0.29297	0.196474	0.500165	2.35583	4.12334	5.94624	6.34667	3.97607	6.30851		IQUB	1.29736e-24	1.07296	0.841	0.209	2.59471e-21	0.00498003	0.0464395	1.98924	0.00460998	0.0309709	0.00891302	0.00618098	0.0175787
NCAPH	7.31987e-44	1.01155	0.754	0.556	1.46397e-40	2.15571	0.291692	0.219845	0.0319394	0.151382	0.0194754	1.98756	0.0960748	0.00732586	0.00831105	0.0186656		RARRES2	2.79909e-29	0.642469	0.827	0.673	5.59818e-26	3.87308	4.65302	3.11281	1.66007	2.85534	2.24125	0.789542	1.29197	0.585663	0.348965	2.13346		JPT2	8.78374e-10	0.8784	0.909	0.746	1.75675e-06	1.69888	1.6894	5.79188	1.95375	1.81489	1.16215	0.763627	0.484624
NDC80	1.06986e-67	1.13212	0.85	0.593	2.13973e-64	2.68234	0.412252	0.371724	0.0506233	0.0581631	0.0439887	4.11692	0.0554	0.11626	0.0749584	0.0170089		RBBP8	1.01996e-28	1.08091	0.883	0.817	2.03992e-25	6.98021	8.02849	2.34789	1.99537	2.25427	1.72826	2.0664	1.08676	0.413312	0.681984	0.417498		KATNAL2	2.10632e-11	0.363333	0.705	0.428	4.21265e-08	0.0285549	0.0777393	0.499012	0.0188796	0.0406251	0.0493653	0.125085	0.0263385
NEK2	5.33925e-26	0.584552	0.686	0.552	1.06785e-22	0.908111	0.0532415	1.23857	0.013902	0.0651883	0.0805363	1.32037	0.0441316	0.00501218	0.00811693	0.00678163		RBP1	1.74552e-47	0.382028	0.69	0.454	3.49104e-44	0.492355	0.834167	0.248825	0.267774	0.206749	0.772316	8.87462	12.2194	4.31182	3.51909	3.90597		KIF9	2.04775e-22	1.36578	0.955	0.591	4.09551e-19	0.299077	0.382787	3.98775	0.205558	0.207062	0.17654	0.0604398	0.108005
NUF2	9.38484e-38	0.829966	0.749	0.495	1.87697e-34	1.84223	0.490699	0.469853	0.0832417	0.103598	0.215828	4.1511	0.124488	0.0285058	0.0302893	-0.0169934		RRM1	2.88226e-17	0.465716	0.635	0.492	5.76451e-14	2.79689	1.13689	0.234729	0.294464	0.473079	0.55481	4.29443	1.03411	0.995419	0.559144	1.34303		LCA5	1.35247e-14	0.677541	0.795	0.499	2.70493e-11	0.0992895	0.32752	1.31685	0.0870551	0.151844	0.238243	0.206063	0.193759
ODC1	1.73889e-10	0.250603	0.85	0.764	3.47777e-07	3.25989	3.59082	3.46385	1.48522	1.73642	1.50548	1.20732	0.818727	0.639116	0.957207	0.470996		S100A16	3.05861e-18	0.367799	0.863	0.744	6.11722e-15	3.95208	3.29921	0.954823	1.56856	3.12322	1.33251	2.09061	2.65076	1.18878	1.09472	1.4993		LDLRAD1	2.08003e-15	1.40319	0.75	0.376	4.16005e-12	0.00785822	0.000886972	3.15197	0.0244668	0.060519	0.0443763	5.05724e-07	0.0102305
OLFM4	5.95021e-15	0.357514	0.787	0.666	1.19004e-11	4.54828	7.95605	0.298747	0.0727188	0.150249	0.160036	0.646293	0.850431	0.0352585	0.00210305	0.0377331		SCD	8.04855e-08	0.579746	0.84	0.825	0.000160971	6.81449	8.41657	3.54317	4.22263	4.41725	3.77636	2.99396	2.76954	2.05295	2.23745	1.71984		LINC00488	1.61706e-17	0.558662	0.727	0.309	3.23412e-14	0.0115096	2.72278e-05	0.784547	0.0434485	0.00740179	-0.000478586	0	0
ORC6	1.01522e-05	0.443389	0.585	0.559	0.0203043	0.983496	0.47989	0.699262	0.130141	0.169991	0.0827467	2.65007	0.18769	0.269156	0.185477	0.218176		SCNN1G	1.64256e-15	0.470177	0.352	0.558	3.28511e-12	0.334802	0.813378	0.119155	0.170297	0.0286663	0.00548967	0.0166985	0.0528348	0.00869368	0.00158261	0.00818959		LINC01765	1.18768e-116	0.76099	0.591	0.007	2.37535e-113	0	0	1.14342	0	0.00934913	0.0107498	0	0
PBK	3.23598e-30	0.76946	0.662	0.419	6.47195e-27	1.41118	0.296207	0.0449096	0.00690724	0.048886	0.0196953	2.9656	0.0953224	0.0148871	0.0468794	0.0126738		SEC14L1	1.87755e-57	0.928997	0.88	0.719	3.7551e-54	3.01793	5.0389	1.49641	1.18643	1.94407	1.07247	0.766106	1.8417	0.632268	0.441146	0.51431		LINC02767	3.07337e-07	0.283248	0.636	0.453	0.000614674	0.0453245	0.138821	0.418258	0.042974	0.00247938	0.0525857	-0.00134002	0.0140288
PCDH7	9.96623e-12	0.377589	0.797	0.709	1.99325e-08	3.02669	2.54634	0.972095	1.36245	1.28654	1.4353	0.403823	0.38132	0.159289	0.0926387	0.267935		SEMA3A	8.32525e-07	0.595286	0.548	0.58	0.00166505	1.13753	1.10664	0.410612	0.115806	0.290513	0.182453	0.0920965	0.0983962	0.030436	0.00496764	0.0173868		LRP11	1.44915e-07	0.290225	0.682	0.549	0.000289831	0.0342665	0.0184508	0.384613	0.041727	0.0577948	0.0708052	0.0014215	0.00443533
PCLAF	1.26313e-41	0.938864	0.768	0.481	2.52627e-38	2.29562	0.645187	0.176114	0.0851384	0.106206	0.00767545	3.47781	0.366951	0.0940542	0.0387843	0.0313332		SEMA3B	1.73363e-26	0.749782	0.821	0.696	3.46726e-23	4.63534	6.54725	1.68051	1.79669	4.73045	2.20297	0.511956	0.656946	1.60616	1.37008	0.529859		LRRC23	8.15693e-10	1.20532	0.727	0.482	1.63139e-06	0.0407896	0.0709884	2.60509	0.101459	0.0646844	0.114246	0.0274536	0.0948959
PCNA	7.00993e-35	0.816417	0.826	0.66	1.40199e-31	2.24223	0.585233	0.325539	0.349192	0.354712	0.160161	2.45269	0.397368	0.0617161	0.110589	0.194938		SERPINA1	8.52184e-134	1.69407	0.854	0.528	1.70437e-130	3.77786	8.8064	2.09331	0.810439	0.778692	1.12333	0.386405	0.560959	0.118168	0.0204621	0.152848		LRRC46	4.73196e-25	0.962637	0.795	0.268	9.46393e-22	-0.000529134	-2.98943e-05	1.63627	0.000730123	0.043035	0.000803655	3.08449e-05	0.00503727
PEG10	1.88374e-10	0.276992	0.802	0.724	3.76748e-07	1.7357	2.06596	0.394412	0.606207	0.33532	0.405517	0.453164	0.140234	0.241157	0.238445	0.310919		SFRP1	2.23936e-28	0.380353	0.617	0.575	4.47872e-25	0.191662	0.508267	0.111232	0.0258228	0.0458796	0.134916	3.03719	4.20605	0.372545	0.332497	0.972673		LRRIQ1	3.19557e-22	2.06036	0.909	0.546	6.39113e-19	0.255492	0.249692	7.8951	0.0395461	0.0670273	0.195759	0.0018436	0.0491614
PGR	3.21364e-20	0.307072	0.812	0.733	6.42727e-17	1.82079	2.64215	0.564224	0.234048	0.119584	0.366092	1.81534	2.93553	0.506872	0.579798	0.324707		SGO2	7.49356e-18	0.277592	0.702	0.607	1.49871e-14	1.45237	0.409734	2.1277	0.0584577	0.0949396	0.16618	3.50353	0.144312	0.11592	0.0777938	0.394193		MAATS1	1.23039e-31	0.718036	0.705	0.061	2.46077e-28	0.00380867	0.000135795	1.05946	0.00693724	0.0069719	0.132063	0.00639503	0.00873865
PHGDH	2.6538e-17	0.420775	0.865	0.775	5.30759e-14	1.903	0.929648	0.388766	0.936582	0.838778	0.76134	1.26675	0.255131	0.765529	0.284919	0.43144		SLC12A2	1.8558e-20	0.862214	0.675	0.612	3.71159e-17	2.6648	2.73747	1.31873	0.508725	0.773184	0.952068	0.692911	0.656345	0.188679	0.118982	0.155225		MAK	6.98282e-15	0.748291	0.795	0.482	1.39656e-11	0.067263	0.115165	1.21562	0.00738732	0.00709068	0.00281832	0.00659935	0.023939
PIF1	5.93325e-23	0.352652	0.647	0.473	1.18665e-19	0.461303	0.0549441	0.0429369	0.00986769	0.0127901	0.0598983	0.41985	0.0528341	0.0985154	0.0669842	0.0138782		SLC39A8	6.47611e-18	0.409788	0.409	0.638	1.29522e-14	1.55855	1.19535	0.198242	0.460346	0.44856	0.373406	0.0889965	0.16779	0.136852	0.0519358	0.377449		MAP1A	1.15175e-11	1.02071	0.75	0.491	2.30349e-08	0.0062478	0.0404006	2.00186	0.118021	0.117128	0.410107	1.44879	0.804621
PLK1	2.25676e-08	0.272338	0.488	0.335	4.51352e-05	0.381944	0.109419	0.030517	0.00973292	0.0525762	3.21235e-06	0.695608	0.0134026	0.00378379	0.000775016	-0.000210233		SLC9A3R1	5.25284e-08	0.540525	0.618	0.563	0.000105057	1.21759	1.4765	1.12965	0.323112	0.778171	0.386803	0.181356	0.225945	0.0549169	0.0413407	0.0129717		MAP3K19	1.06695e-24	1.08512	0.818	0.3	2.1339e-21	-0.00226857	0.00198296	1.99827	0.0192528	0.0290366	0.0158022	-0.000651455	-9.69796e-05
POLQ	4.43178e-28	0.576546	0.696	0.554	8.86356e-25	1.01526	0.307316	0.0342201	0.0271485	0.0625032	0.100419	1.01407	0.0542426	0.0101861	0.0177413	0.0030312		SMC4	4.30408e-12	0.861165	0.83	0.77	8.60815e-09	12.4709	5.78268	3.07876	1.96233	1.59808	2.4856	15.9635	1.57507	0.977115	0.904208	0.663252		MAPK15	3.29066e-10	0.395238	0.682	0.444	6.58131e-07	0.00325901	0.0201682	0.518061	0.0242805	0.0344966	0.0820277	0.000151488	0.00861101
PRC1	1.91583e-35	0.854352	0.71	0.484	3.83166e-32	1.70428	0.300684	0.111777	0.05013	0.115244	0.189546	2.93645	0.0619051	0.0212771	0.0206379	0.049267		SORBS2	1.06868e-18	0.260702	0.449	0.685	2.13736e-15	1.59051	1.65272	1.42887	0.852786	1.58193	1.37119	0.0906935	0.0998633	0.054618	0.0441542	0.0290351		MELK	3.8225e-08	0.257605	0.727	0.581	7.64501e-05	1.32149	0.26448	0.638284	0.0802734	0.117067	0.140725	1.90423	0.0664231
PRR11	1.41903e-18	0.482468	0.662	0.614	2.83807e-15	0.821676	0.251794	0.0254456	0.0436701	0.08965	0.0505317	1.49657	0.149142	0.0440454	0.0261048	0.0234416		SOX17	5.64952e-42	1.0535	0.811	0.786	1.1299e-38	7.90051	11.2445	2.49324	3.60363	2.33047	1.23656	0.43156	0.732319	0.238926	0.0994447	0.119769		MGLL	1.98583e-09	0.726318	0.864	0.65	3.97166e-06	0.62758	2.12898	4.08051	1.1734	1.33494	1.1413	2.94065	3.91307
PSIP1	5.46793e-19	0.552715	0.831	0.684	1.09359e-15	3.72138	2.25309	7.36343	1.24728	1.10725	2.2402	6.77531	2.05191	1.44839	1.28253	0.685482		SOX9	3.02689e-48	0.401215	0.708	0.528	6.05378e-45	0.738623	0.867125	0.302576	0.18764	0.425694	0.162902	0.0548293	0.0721343	0.0062898	0.00451793	0.0324487		MLF1	6.85826e-21	0.902039	0.886	0.434	1.37165e-17	0.0194562	0.0847141	1.65265	0.0987311	0.0313336	0.0383407	0.111588	0.114607
PTTG1	1.33286e-29	0.604191	0.744	0.583	2.66573e-26	1.31814	0.447057	0.754458	0.151144	0.136395	0.134482	3.90092	0.171342	0.0279849	0.0773282	0.156275		SPARCL1	2.00561e-07	0.590328	0.775	0.791	0.000401122	1.18633	4.23441	1.6378	1.94895	1.76463	9.61832	42.9441	47.8144	39.9347	44.7703	16.6611		MNS1	5.32242e-28	2.08536	1	0.6	1.06448e-24	1.40444	0.444338	9.77177	0.0971205	0.105763	0.140525	0.491368	0.0470251
RAD51AP1	5.04199e-09	0.270048	0.314	0.549	1.0084e-05	0.379369	0.0953155	0.0666584	0.0149543	0.0662142	0.00784523	0.83466	0.0647144	0.0210952	0.0154993	0.0181771		SPATA13	8.85107e-26	1.04235	0.681	0.587	1.77021e-22	1.92756	3.56086	1.49489	0.704419	0.337684	0.446066	0.150475	0.382538	0.143661	0.0766165	0.170744		MORN2	4.86995e-12	1.46948	0.795	0.537	9.7399e-09	0.255962	0.436562	4.49816	0.158325	0.198595	0.121645	0.165101	0.258722
RBBP8	3.12843e-20	0.431999	0.937	0.838	6.25686e-17	6.98021	8.02849	2.34789	1.99537	2.25427	1.72826	2.0664	1.08676	0.413312	0.681984	0.417498		SPON1	2.0363e-07	0.643433	0.81	0.835	0.00040726	5.29406	7.24409	1.81938	3.11479	3.94384	2.82335	2.19506	2.40526	1.13479	1.36473	1.29935		MS4A8	1.24535e-07	0.801442	0.591	0.274	0.00024907	0.0052623	0.0382051	1.32079	0.0293525	0.104694	0.159695	-4.32662e-06	0.00274097
RFC4	8.007e-09	0.407644	0.652	0.595	1.6014e-05	0.969634	0.39616	0.16462	0.290887	0.198551	0.143592	0.761301	0.142665	0.0515053	0.073245	0.0827145		SPON2	1.0425e-38	0.267644	0.797	0.697	2.08499e-35	0.611781	0.952143	0.894311	0.521925	0.414422	3.02405	17.8774	28.8674	13.2098	13.479	7.4726		MUC1	4.83754e-06	0.341836	0.977	0.867	0.00967509	1.90543	3.20921	8.98021	7.80363	10.1873	5.93997	0.184415	0.162686
RRM1	8.93997e-37	0.85145	0.787	0.543	1.78799e-33	2.79689	1.13689	0.234729	0.294464	0.473079	0.55481	4.29443	1.03411	0.995419	0.559144	1.34303		SPRY1	6.02214e-85	0.856533	0.808	0.593	1.20443e-81	1.99378	2.30951	0.554977	0.370814	0.502441	0.343239	0.47177	0.782554	0.0632727	0.0308015	0.114664		MUC13	6.34285e-08	0.913381	0.727	0.623	0.000126857	0.0113884	0.0158754	1.97807	0.137991	0.85875	0.16069	0.000474899	0.0027937
RRM2	5.21874e-20	0.617633	0.667	0.582	1.04375e-16	1.0364	0.187687	0.130904	0.0271406	0.099252	0.062155	2.94575	0.0758707	0.025106	0.00442336	0.020123		STC1	6.99897e-27	0.789482	0.904	0.796	1.39979e-23	3.08595	9.76929	2.66624	4.70811	1.5881	9.01986	13.942	16.2958	8.16702	1.50996	53.0622		MYB	3.22023e-08	0.825781	0.705	0.581	6.44045e-05	0.11045	0.0804262	1.44887	0.0684838	0.0412836	0.0401466	0.00200727	0.00356891
S100A10	3.14199e-10	0.252584	0.932	0.858	6.28398e-07	5.71575	4.68967	4.07251	3.65087	4.80542	3.01408	0.22336	0.562796	0.28387	0.15977	0.478807		STK17A	1.32404e-22	0.670774	0.744	0.617	2.64808e-19	1.89666	2.33936	1.50806	0.663925	0.829957	0.554147	0.698812	0.459134	0.297447	0.251196	0.776859		MYCBPAP	1.74643e-21	0.412962	0.659	0.194	3.49286e-18	7.45361e-05	2.87826e-05	0.515199	0.00581882	0.000646042	0.00579374	0.00963007	0.00819378
S100A16	4.91929e-14	0.369681	0.865	0.784	9.83858e-11	3.95208	3.29921	0.954823	1.56856	3.12322	1.33251	2.09061	2.65076	1.18878	1.09472	1.4993		STMN1	1.48681e-65	1.04889	0.893	0.705	2.97363e-62	8.25842	5.87235	1.33019	1.49196	1.17009	1.43842	12.3521	2.08081	0.794321	0.806921	0.795774		MYO5B	6.4436e-09	0.584979	0.818	0.625	1.28872e-05	0.453863	0.400572	1.90206	0.663021	1.059	0.52753	0.0232134	0.0537184
SDF2L1	7.38005e-11	0.341506	0.725	0.617	1.47601e-07	1.12151	0.646002	0.411741	0.335989	0.705066	0.232406	0.530429	0.557498	0.321741	0.354667	0.306877		STX18	1.00038e-20	0.856242	0.843	0.883	2.00077e-17	9.48815	10.2382	3.33298	4.43488	1.9121	2.83666	0.835595	1.05146	0.730341	0.713904	0.756189		MZF1-AS1	2.07264e-11	0.91246	0.727	0.422	4.14528e-08	0.0817241	0.075867	1.64034	0.0526817	0.0336009	0.0439265	0.0515471	0.054234
SEMA3A	3.06725e-06	0.353101	0.589	0.567	0.0061345	1.13753	1.10664	0.410612	0.115806	0.290513	0.182453	0.0920965	0.0983962	0.030436	0.00496764	0.0173868		SULF1	1.95703e-43	0.344489	0.119	0.413	3.91406e-40	0.0889918	0.45542	0.0377945	0.0426173	-0.000605345	0.260339	1.48284	1.7422	0.39356	0.323831	0.521852		NAPSB	7.78785e-08	0.544659	0.227	0.63	0.000155757	0.046944	0.18268	1.4726	0.153334	2.01716	0.113094	0.0280252	0.0188227
SGO1	1.1789e-39	0.774003	0.749	0.538	2.35779e-36	1.48229	0.253934	1.00521	0.0421776	0.0798585	0.103049	1.84233	0.0503634	0.00304999	0.00727086	0.00515535		SYBU	1.17612e-08	0.266235	0.612	0.606	2.35224e-05	0.232299	0.465664	0.889025	0.145401	0.0602593	0.0394254	0.0206822	0.032477	0.0183624	0.00194948	0.062057		NEDD4L	1.529e-05	0.287228	0.773	0.615	0.03058	0.648631	0.595006	1.11016	0.532891	0.658214	0.208159	0.0818765	0.109242
SGO2	2.63021e-17	0.686107	0.686	0.643	5.26042e-14	1.45237	0.409734	2.1277	0.0584577	0.0949396	0.16618	3.50353	0.144312	0.11592	0.0777938	0.394193		TACSTD2	2.84662e-32	0.632286	0.844	0.666	5.69325e-29	12.3029	10.5473	3.89732	2.07649	13.7459	3.85803	0.774528	1.02797	0.341231	0.164654	0.613335		NEK10	6.3859e-07	0.650835	0.727	0.638	0.00127718	0.0189657	0.0341937	1.06646	0.142612	0.0280576	0.240169	0.000169906	0.0123404
SHCBP1	2.59902e-13	0.507413	0.527	0.283	5.19804e-10	0.957233	0.419655	0.280321	0.0428706	0.0235499	0.0438523	4.41726	0.0944606	0.0505776	0.070878	0.00355261		TAOK1	1.09113e-08	0.485009	0.755	0.809	2.18225e-05	1.84694	6.01265	2.16068	2.81227	4.73985	6.81314	2.86787	2.46316	2.87019	2.55	2.65734		NEK11	4.56555e-12	1.24308	0.818	0.574	9.1311e-09	0.130794	0.279398	3.46269	0.347096	0.237459	0.117384	0.0837695	0.0873992
SKA3	8.98197e-14	0.360864	0.531	0.348	1.79639e-10	0.547746	0.190653	0.0876499	0.0115498	0.0253652	0.0143498	0.9293	0.0830372	0.0256163	0.0300502	0.00925718		TFF1	6.34451e-31	0.424932	0.599	0.408	1.2689e-27	0.592254	0.790238	0.0697419	0.11558	0.324994	0.117668	0.0437493	0.14494	0.00269553	0.00343065	0.0154423		NEK5	2.52254e-09	0.706421	0.75	0.596	5.04507e-06	0.0092355	0.0485633	1.17777	0.113891	0.0617707	0.158837	0.0175478	0.0205419
SLC12A2	4.59079e-21	0.440608	0.821	0.638	9.18159e-18	2.6648	2.73747	1.31873	0.508725	0.773184	0.952068	0.692911	0.656345	0.188679	0.118982	0.155225		TFF3	5.13702e-21	0.592994	0.791	0.699	1.0274e-17	4.27527	8.15119	2.2437	4.20873	3.63224	3.42895	0.598631	0.678264	0.323114	0.211529	0.481143		NME5	4.2771e-11	1.17459	0.773	0.569	8.55419e-08	0.109908	0.168931	2.63647	0.0476223	0.247222	0.0674122	0.0231175	0.0513676
SLC39A8	1.09093e-09	0.401361	0.671	0.55	2.18186e-06	1.55855	1.19535	0.198242	0.460346	0.44856	0.373406	0.0889965	0.16779	0.136852	0.0519358	0.377449		TGM2	3.69964e-06	0.458546	0.811	0.742	0.00739928	2.18222	3.80967	1.3261	1.63174	3.19155	6.82152	21.5304	25.0664	23.239	22.5074	12.1038		NME9	4.82919e-51	0.569628	0.705	0.074	9.65839e-48	0	2.34902e-06	0.769247	0.0014451	0.00205893	0.016233	2.16144e-08	2.24685e-07
SLF1	6.54173e-11	0.289365	0.623	0.506	1.30835e-07	0.605371	0.394063	0.142099	0.116116	0.0362387	0.167225	0.587782	0.11605	0.0886182	0.0904721	0.198061		TMPO	5.059e-07	0.304087	0.707	0.789	0.0010118	4.30932	2.07122	1.91406	1.3244	1.10141	1.15079	4.74941	0.430853	0.18452	0.143297	0.225874		NPHP1	2.71979e-12	1.40681	0.795	0.501	5.43957e-09	0.0856231	0.144044	3.77924	0.225322	0.128209	0.367587	0.0626611	0.106871
SMC1A	1.10085e-34	0.957069	0.86	0.669	2.2017e-31	6.41431	2.64373	2.62092	1.30787	1.53596	1.66706	5.46842	1.74723	0.852969	1.20401	0.441768		TNFRSF12A	2.43511e-16	0.443468	0.825	0.695	4.87022e-13	4.34554	3.49035	1.86811	1.09942	4.08413	1.56745	0.946889	2.24501	0.552374	0.224046	3.54725		NPHP4	1.22403e-15	0.336107	0.75	0.346	2.44806e-12	0.0381205	0.0877538	0.471624	0.0379481	0.0200496	0.0133296	0.122084	0.102798
SMC2	7.14593e-40	1.00388	0.841	0.677	1.42919e-36	4.86453	1.98708	0.968111	0.63364	0.810856	0.712799	6.67221	0.755672	0.453732	0.382315	0.627025		TOP2A	1.05079e-36	1.13493	0.717	0.583	2.10158e-33	12.4683	3.39331	3.22008	0.390646	0.472894	1.38637	23.0382	0.930552	0.260872	0.204386	0.163104		ODC1	8.95842e-07	0.27713	0.909	0.769	0.00179168	3.25989	3.59082	3.46385	1.48522	1.73642	1.50548	1.20732	0.818727
SMC4	4.7428e-73	1.14664	0.99	0.791	9.4856e-70	12.4709	5.78268	3.07876	1.96233	1.59808	2.4856	15.9635	1.57507	0.977115	0.904208	0.663252		TPX2	9.67262e-08	0.517994	0.476	0.617	0.000193452	4.53599	1.07656	0.877071	0.208735	0.316687	0.312337	7.83797	0.433137	0.188647	0.162006	0.039978		ODF2L	1.35023e-20	1.54453	1	0.803	2.70045e-17	3.42733	2.88239	17.5748	3.08797	2.49548	5.63318	1.83252	2.13454
SPAG5	7.68462e-22	0.53248	0.671	0.538	1.53692e-18	0.894566	0.211848	0.391418	0.0377615	0.0691624	0.0859773	1.00698	0.0305519	0.0032497	0.0223151	0.0568815		TRIB1	5.59489e-30	0.353539	0.724	0.585	1.11898e-26	1.17072	1.07688	0.622087	0.489669	0.370338	0.560702	0.461485	0.826441	0.323866	0.500857	0.626348		ODF3B	2.953e-19	1.22378	0.864	0.432	5.90601e-16	0.035024	0.0161817	2.79062	0.201396	0.136167	0.146568	0.0757821	0.0255745
SPC24	4.76824e-23	0.405968	0.614	0.419	9.53649e-20	0.566249	0.0923761	0.0178328	0.00399746	0.0532578	0.113	0.800057	0.0958546	0.0335249	0.0626816	0.00707812		TRPC6	9.60738e-114	0.4341	0.768	0.5	1.92148e-110	0.797789	0.694176	0.285108	0.0916839	0.114125	0.0357489	0.109456	0.0957366	0.0282958	0.0498969	0.117211		OLMALINC	3.99151e-10	0.319986	0.818	0.59	7.98302e-07	0.617909	1.19494	1.18855	0.260479	0.185279	0.298122	0.0787168	0.0965953
SPC25	8.26082e-10	0.625198	0.57	0.492	1.65216e-06	0.993791	0.160731	0.00843717	0.016752	0.0134723	0.0397263	1.5531	0.0618985	0.00778423	0.00413307	0.000178502		TUBA1B	5.74304e-22	0.875134	0.903	0.831	1.14861e-18	17.416	8.76243	5.16554	3.12649	2.90739	3.14857	22.6622	4.62066	3.58375	3.86861	2.65676		OMG	6.83568e-19	0.933398	0.75	0.336	1.36714e-15	2.02913e-05	6.16337e-05	1.562	0.0173364	0.000167409	0.00161049	0.000531919	0.0082602
SPDL1	1.47542e-30	0.696858	0.821	0.585	2.95084e-27	2.73802	1.03746	0.527891	0.621875	1.20409	0.844732	3.52411	0.632988	0.269406	0.351869	0.337484		TUBB	1.39928e-16	0.629748	0.881	0.813	2.79855e-13	9.63859	5.4909	1.53366	2.66858	1.8649	2.61643	14.4597	4.07315	3.92583	4.19125	5.78079		P4HA2	1.48393e-07	0.342673	0.864	0.681	0.000296786	0.605498	0.894575	1.57753	0.838996	0.806917	2.16778	3.908	2.53447
SPRY1	2.3034e-14	0.362923	0.763	0.673	4.6068e-11	1.99378	2.30951	0.554977	0.370814	0.502441	0.343239	0.47177	0.782554	0.0632727	0.0308015	0.114664		UBE2T	1.94323e-14	0.309359	0.545	0.412	3.88646e-11	2.0251	0.532997	0.645928	0.115367	0.152462	0.0664696	3.52093	0.24758	0.048148	0.123183	0.0799481		PALMD	8.6544e-15	0.90207	0.841	0.567	1.73088e-11	0.204475	0.293677	1.98223	0.180563	0.115158	0.537415	1.17432	1.80139
STMN1	1.27506e-50	0.842735	0.966	0.775	2.55011e-47	8.25842	5.87235	1.33019	1.49196	1.17009	1.43842	12.3521	2.08081	0.794321	0.806921	0.795774		UGCG	3.94174e-07	0.404043	0.753	0.629	0.000788349	1.82459	2.05433	2.36522	0.915108	1.38811	1.31293	0.670463	0.735199	0.601702	0.351227	0.647855		PCM1	1.24476e-06	0.421527	0.977	0.898	0.00248952	5.29318	6.60993	9.65154	6.53578	3.54506	7.1323	3.98202	2.79957
STX18	2.03975e-18	0.396983	0.947	0.868	4.0795e-15	9.48815	10.2382	3.33298	4.43488	1.9121	2.83666	0.835595	1.05146	0.730341	0.713904	0.756189		VIM	4.41971e-55	0.824527	0.94	0.889	8.83941e-52	5.30702	12.032	8.31096	5.14688	3.49488	13.4377	29.458	19.4248	46.3056	42.4606	47.2223		PERP	6.7812e-06	0.570427	0.955	0.908	0.0135624	7.121	8.2992	15.0796	7.34932	10.3396	4.05298	0.815245	0.717047
TACC3	9.52098e-46	0.920661	0.778	0.472	1.9042e-42	2.14395	0.39797	0.512054	0.118016	0.278335	0.0876343	2.47865	0.0929477	0.0794971	0.0291414	0.00426902		VRK1	2.38644e-36	0.285321	0.71	0.567	4.77289e-33	1.09139	0.640309	0.812312	0.172186	0.404679	0.08868	1.13053	0.194822	0.115126	0.0746627	0.0508601		PIFO	2.5272e-28	1.75131	0.955	0.476	5.05439e-25	0.00305446	0.0215036	4.92937	0.0264778	0.0690897	0.113367	0.0013697	0.00441544
TACSTD2	2.27448e-16	0.505602	0.899	0.732	4.54896e-13	12.3029	10.5473	3.89732	2.07649	13.7459	3.85803	0.774528	1.02797	0.341231	0.164654	0.613335		WDHD1	9.25442e-26	0.296424	0.575	0.375	1.85088e-22	0.718759	0.407254	-0.0102194	0.0442811	0.0518066	0.102876	0.546757	0.0858485	0.0810121	0.0273774	0.139915		PIH1D2	9.63079e-14	1.44021	0.773	0.497	1.92616e-10	0.0690993	0.082079	3.48972	0.0684801	0.00582399	0.0664813	0.0203896	0.0660939
TK1	1.53283e-37	0.729792	0.763	0.505	3.06566e-34	1.69037	0.454861	1.0871	0.137882	0.294208	0.230457	2.21781	0.117669	0.0749946	0.087056	0.0187369		WDR66	9.78099e-20	0.327912	0.705	0.597	1.9562e-16	0.188144	0.782664	3.51641	0.269439	0.326038	0.577215	0.262922	0.286134	0.284055	0.155053	0.24846		PIH1D3	1.64712e-301	0.284742	0.636	0	3.29424e-298	0	0	0.329419	0	0	0	0	0
TMPO	2.11175e-34	0.727353	0.908	0.757	4.2235e-31	4.30932	2.07122	1.91406	1.3244	1.10141	1.15079	4.74941	0.430853	0.18452	0.143297	0.225874		ZWINT	4.66723e-15	0.314088	0.612	0.462	9.33446e-12	1.77637	0.485066	0.0373001	0.0561723	0.165267	0.0546769	1.51899	0.204436	0.0295064	0.0262772	-0.0198151		PLEKHS1	8.03015e-09	0.517249	0.727	0.542	1.60603e-05	0.308109	0.4668	1.12639	0.185652	0.041621	0.0699695	0.0873389	0.0565928
TNFAIP8L1	1.07459e-25	0.497684	0.652	0.435	2.14919e-22	0.956855	0.192307	3.56351	0.071197	0.0576293	0.0338306	0.663083	0.169611	0.0731134	0.0450344	0.293047																				PLK4	7.9995e-07	0.945052	0.636	0.448	0.0015999	0.52001	0.263749	1.94895	0.0171244	0.0150827	0.134735	0.502046	0.016125
TNFRSF12A	2.0069e-14	0.437631	0.836	0.742	4.0138e-11	4.34554	3.49035	1.86811	1.09942	4.08413	1.56745	0.946889	2.24501	0.552374	0.224046	3.54725																				PPIL6	2.62048e-22	1.89471	0.909	0.592	5.24097e-19	0.0918587	0.0644065	6.17981	0.0820878	0.0973984	0.114165	0.0197508	0.0739884
TOP2A	2.91672e-79	1.67218	0.947	0.633	5.83345e-76	12.4683	3.39331	3.22008	0.390646	0.472894	1.38637	23.0382	0.930552	0.260872	0.204386	0.163104																				PPP1R36	5.51513e-08	0.425606	0.705	0.61	0.000110303	0.0437578	0.0753301	0.640671	0.0757967	0.0720166	0.0235117	0.000358343	0.0694505
TPX2	2.68574e-54	1.27403	0.85	0.569	5.37147e-51	4.53599	1.07656	0.877071	0.208735	0.316687	0.312337	7.83797	0.433137	0.188647	0.162006	0.039978																				PPP1R42	1.18768e-116	0.293561	0.568	0.008	2.37535e-113	2.2673e-07	2.07513e-06	0.341197	0	0	4.70843e-07	0.000105498	0.00263078
TRIP13	1.81434e-15	0.305159	0.643	0.633	3.62868e-12	0.472772	0.151214	0.596895	0.0297877	0.030058	0.0542432	0.584516	0.0520433	0.0309735	0.0253565	0.0119799																				PRR29	2.59971e-25	0.791835	0.795	0.271	5.19943e-22	2.01e-05	7.24636e-05	1.21565	0.00802872	0.00184056	0.000952851	0	0
TRPC6	2.32488e-27	0.314319	0.758	0.598	4.64975e-24	0.797789	0.694176	0.285108	0.0916839	0.114125	0.0357489	0.109456	0.0957366	0.0282958	0.0498969	0.117211																				PSENEN	4.27966e-19	1.94668	0.955	0.663	8.55932e-16	1.14394	1.04122	13.1664	0.949963	1.10653	0.610791	1.03345	0.888918
TTK	2.06994e-15	0.667527	0.575	0.376	4.13987e-12	1.13091	0.184531	0.420766	0.0173241	0.0638716	0.00789442	1.84121	0.0832516	0.0307769	0.00214539	0.00575371																				PSIP1	4.79951e-12	1.09621	0.955	0.692	9.59903e-09	3.72138	2.25309	7.36343	1.24728	1.10725	2.2402	6.77531	2.05191
TUBA1B	4.53012e-63	1.0999	0.99	0.859	9.06023e-60	17.416	8.76243	5.16554	3.12649	2.90739	3.14857	22.6622	4.62066	3.58375	3.86861	2.65676																				PTGER2	2.15236e-05	0.356912	0.659	0.618	0.0430473	0.0019829	0.0142635	0.516332	0.126718	0.0162174	0.0439061	0.0143006	0.0177508
TUBA1C	9.34995e-40	0.881862	0.937	0.729	1.86999e-36	5.80965	2.18287	1.40248	1.63151	1.61758	1.67183	5.75055	1.27607	1.05225	0.992612	0.806937																				PTHLH	4.03852e-08	0.287102	0.682	0.553	8.07704e-05	0.000259952	0.00436034	0.365498	0.0374351	0.0486531	0.0397025	0.0310438	0.0274006
TUBB	1.35712e-42	0.858026	0.961	0.838	2.71424e-39	9.63859	5.4909	1.53366	2.66858	1.8649	2.61643	14.4597	4.07315	3.92583	4.19125	5.78079																				PTTG1	2.26181e-09	0.255668	0.795	0.594	4.52362e-06	1.31814	0.447057	0.754458	0.151144	0.136395	0.134482	3.90092	0.171342
TUBB4B	1.73935e-29	0.578062	0.932	0.836	3.47871e-26	6.70901	3.58592	17.563	2.79131	2.3205	3.09539	6.06116	1.8877	1.24675	1.31856	2.52548																				RASSF6	5.71677e-06	0.602418	0.75	0.616	0.0114335	0.158955	0.107522	1.33096	0.339653	0.537576	0.355928	0.0157106	0.00214701
TYMS	6.22571e-48	0.660386	0.792	0.584	1.24514e-44	1.20939	0.257667	0.178948	0.0811127	0.0548604	0.0531948	1.84492	0.184444	0.0333849	0.0103361	0.0194151																				RFX3	5.90242e-17	1.30896	0.864	0.477	1.18048e-13	0.29715	0.488927	3.97028	0.251447	0.310745	0.221227	0.0439133	0.237629
UACA	1.67916e-11	0.284229	0.884	0.841	3.35832e-08	5.14396	4.55375	4.14755	2.57142	4.50225	5.16811	1.74545	1.43605	1.30925	1.00319	0.786612																				RGCC	3.42941e-10	0.867463	0.773	0.6	6.85881e-07	0.162133	0.203657	1.93558	0.235824	0.333914	1.08008	1.76553	1.70788
UBE2C	5.68444e-33	0.675426	0.705	0.546	1.13689e-29	1.13035	0.175344	0.154227	0.0215031	0.0539896	0.0618882	2.6506	0.0698069	0.0281993	0.0305588	0.00653719																				RGS22	1.4054e-34	1.04441	0.705	0.125	2.8108e-31	0.000173246	0.0393019	1.93063	0.0433195	1.00089e-05	0.0017124	0.120577	0.0728672
UBE2T	2.12106e-49	0.859255	0.787	0.461	4.24212e-46	2.0251	0.532997	0.645928	0.115367	0.152462	0.0664696	3.52093	0.24758	0.048148	0.123183	0.0799481																				RHEX	1.94367e-06	0.353746	0.75	0.613	0.00388735	0.224028	0.423403	0.975222	0.409522	0.347368	0.358108	0.000652928	0.0287187
WDHD1	1.59083e-07	0.38224	0.56	0.44	0.000318166	0.718759	0.407254	-0.0102194	0.0442811	0.0518066	0.102876	0.546757	0.0858485	0.0810121	0.0273774	0.139915																				RIBC1	7.88072e-11	0.836588	0.727	0.554	1.57614e-07	0.0165252	0.0242117	1.34647	0.0117522	0.0128713	0.0297814	0.000925164	0.00860007
ZWILCH	7.7313e-22	0.433746	0.725	0.593	1.54626e-18	0.924218	0.444357	0.126838	0.143989	0.126417	0.128406	1.88342	0.23793	0.117252	0.106502	0.144766																				RIBC2	8.50562e-08	0.982638	0.705	0.553	0.000170112	0.273919	0.13187	1.89434	0.017173	0.0429006	0.0446212	0.280624	0.021537
ZWINT	1.44949e-33	0.817887	0.734	0.513	2.89899e-30	1.77637	0.485066	0.0373001	0.0561723	0.165267	0.0546769	1.51899	0.204436	0.0295064	0.0262772	-0.0198151																				RIPOR2	1.19373e-11	0.369961	0.682	0.349	2.38747e-08	0.00080961	0.046255	0.478861	0.0128299	0.00585466	0.1199	0.323506	0.267827
																																				ROPN1L	1.89931e-23	1.58314	0.795	0.26	3.79861e-20	-0.000462546	0.0493615	4.05212	0.0481668	0.00511234	0.00299078	-4.93268e-05	0.000949234
																																				RP1	2.00156e-16	0.882129	0.659	0.186	4.00312e-13	0.0100277	-4.21665e-05	1.45205	0.000867983	0.0898912	0.0176728	0.0133559	4.81913e-06
																																				RPGR	1.26307e-18	1.64308	0.932	0.633	2.52615e-15	0.384297	0.817391	7.38146	0.567455	0.497334	0.991933	0.40688	0.590639
																																				RRAD	4.00411e-06	0.980045	0.682	0.542	0.00800822	0.0833673	0.0457388	2.08051	0.231205	0.230172	0.258773	0.0335364	0.0113332
																																				RSPH1	8.10166e-28	2.78682	0.977	0.62	1.62033e-24	0.111125	0.4205	20.0759	0.26336	0.254357	0.57698	0.0125749	0.0609119
																																				RSPH4A	1.14592e-21	1.57463	0.886	0.489	2.29184e-18	0.00140424	0.0716136	3.97892	0.0165537	0.00310064	0.110747	0.0844074	0.0187026
																																				RSPH9	5.35508e-32	0.786361	0.636	0.068	1.07102e-28	1.18566e-05	0.000127665	1.19911	0.00390954	-6.50821e-05	0.00445531	0.0295669	0.0555033
																																				SAMD15	6.36483e-20	1.65633	0.909	0.493	1.27297e-16	0.103475	0.0923333	4.57731	0.0478228	0.0253291	0.0963076	0.0856066	0.0783861
																																				SATB1	1.26127e-05	0.279358	0.682	0.622	0.0252254	0.0828284	0.131914	0.457613	0.0786302	0.117624	0.069565	0.00267263	0.169518
																																				SAXO2	9.04297e-17	1.14772	0.818	0.563	1.80859e-13	0.0107054	0.0196353	2.2103	0.00352716	0.065263	0.0273634	-0.000135028	0.00182598
																																				SCGB1D4	6.68697e-07	0.391004	0.25	0.645	0.00133739	0.239278	0.159048	2.4364	2.86521	0.204881	1.13825	0.0211157	0.0096783
																																				SERPINE2	1.86297e-09	0.32656	0.705	0.535	3.72594e-06	0.0717465	0.0687578	0.452567	0.0156455	0.0781447	0.0105299	0.783549	0.605097
																																				SGO2	1.4138e-05	0.867394	0.682	0.646	0.0282759	1.45237	0.409734	2.1277	0.0584577	0.0949396	0.16618	3.50353	0.144312
																																				SIN3A	1.32275e-07	0.256086	0.773	0.558	0.000264549	0.406709	0.366971	0.868459	0.567943	0.301197	0.378762	0.810388	0.404727
																																				SLC27A2	8.91557e-09	0.266551	0.659	0.455	1.78311e-05	0.156805	0.0658764	0.354017	0.00048856	0.00180596	0.0138014	0.0166975	0.000745369
																																				SMIM22	3.71727e-08	0.533701	0.932	0.789	7.43453e-05	1.0077	1.36311	3.31099	1.29348	2.87892	0.896337	0.0376694	0.111259
																																				SMIM6	2.25621e-16	1.69458	0.864	0.56	4.51243e-13	0.296661	0.138569	5.66176	0.140251	0.595406	0.0776211	0.00372001	0.00717105
																																				SNTN	7.51266e-10	1.64286	0.705	0.422	1.50253e-06	0.000191228	0.00135448	4.40423	0.105251	0.000746175	0.165344	0.000378648	0.00816835
																																				SPA17	9.82329e-20	2.23439	0.886	0.506	1.96466e-16	0.807138	0.59024	12.7199	0.334332	0.367755	0.28709	1.0449	0.286541
																																				SPACA9	1.42044e-13	0.97548	0.773	0.522	2.84088e-10	0.0249661	0.0362165	1.72774	0.029225	0.0112838	0.0502577	0.0358898	0.0217873
																																				SPAG17	9.36972e-21	1.83168	0.886	0.571	1.87394e-17	0.0411725	0.0560584	5.55392	0.057209	0.0194301	0.176209	0.0288966	0.0108727
																																				SPAG6	2.00054e-15	0.666244	0.659	0.274	4.00107e-12	8.88096e-06	6.75992e-06	0.961338	0.00541121	0.0338024	0.00830344	1.99247e-06	3.97511e-05
																																				SPAG8	7.20616e-34	1.33255	0.909	0.279	1.44123e-30	0.007924	0.0269044	2.84136	0.0074233	0.00428136	0.00569982	0.000989008	0.0159152
																																				SPATA17	1.02836e-19	1.19309	0.909	0.629	2.05672e-16	0.0381268	0.0409622	2.47065	0.0492524	0.0963828	0.0406662	0.0137604	0.00497808
																																				SPATA18	5.06966e-13	1.18506	0.773	0.411	1.01393e-09	0.0903796	0.0792935	2.62845	0.10917	0.186822	0.192484	0.0114481	0.0431739
																																				SPATA6	4.01899e-11	0.505849	0.75	0.597	8.03798e-08	0.0641744	0.0923042	0.758457	0.0434281	0.0362917	0.0723629	0.0240545	0.0221269
																																				SPEF2	1.05306e-25	1.90557	0.977	0.584	2.10612e-22	0.145284	0.229994	6.90402	0.154151	0.137853	0.150748	0.176114	0.235385
																																				SRGAP3-AS2	1.61111e-17	0.426837	0.409	0	3.22223e-14	0	-1.14486e-05	0.532397	0	0	0	0	0
																																				STK33	2.00905e-14	1.54943	0.864	0.594	4.0181e-11	0.260304	0.173625	4.46574	0.164199	0.0593777	0.0985112	0.0032876	0.0586297
																																				STMND1	3.81117e-25	1.17711	0.682	0.14	7.62233e-22	3.98777e-06	0.0153476	2.26716	0.00339126	0.0024755	0.0176499	0.00654458	0.00715721
																																				SYBU	3.14056e-11	0.416397	0.818	0.613	6.28111e-08	0.232299	0.465664	0.889025	0.145401	0.0602593	0.0394254	0.0206822	0.032477
																																				SYT13	8.62764e-08	0.301143	0.659	0.442	0.000172553	0.00450789	6.85561e-05	0.387647	0.0462849	0.0442335	0.069197	-3.2632e-05	-0.000123123
																																				SYTL2	2.76e-14	0.293791	0.659	0.195	5.52001e-11	0.0162948	0.0136129	0.485928	0.0269441	0.596881	0.031633	0.0441617	0.0216136
																																				TAGLN2	2.78888e-06	0.583921	0.977	0.883	0.00557776	5.23055	4.898	9.15656	4.59515	3.99087	3.13773	1.33905	0.827209
																																				TCF7	2.42301e-10	0.725653	0.75	0.573	4.84603e-07	0.143963	0.108016	1.18898	0.0134701	0.0298234	0.139366	0.0738924	0.103586
																																				TCTEX1D2	8.14468e-11	1.18351	0.864	0.579	1.62894e-07	0.373091	0.280112	3.1092	0.217486	0.252007	0.182013	0.209983	0.189191
																																				TEKT1	1.01107e-20	0.843908	0.795	0.368	2.02214e-17	5.82463e-06	0.000139499	1.33436	0.00781806	0.00309089	0.00838459	6.39917e-05	2.44403e-05
																																				TK1	1.22666e-05	0.388331	0.705	0.526	0.0245331	1.69037	0.454861	1.0871	0.137882	0.294208	0.230457	2.21781	0.117669
																																				TMEM190	1.52091e-26	1.12872	0.659	0.155	3.04182e-23	6.38177e-07	8.22343e-05	2.09402	0.000120261	0.00446072	0.0510259	0.000219091	0.000693245
																																				TMEM231	4.16427e-16	1.58457	0.864	0.597	8.32853e-13	0.161962	0.0805189	4.3462	0.102452	0.0701324	0.0742436	0.117766	0.0770135
																																				TMEM232	3.03787e-06	0.603527	0.659	0.486	0.00607574	0.0122462	0.0196891	0.855658	0.0108739	0.0170429	0.0867885	0.02434	0.0145857
																																				TNFAIP8L1	4.79858e-17	1.34037	0.841	0.448	9.59716e-14	0.956855	0.192307	3.56351	0.071197	0.0576293	0.0338306	0.663083	0.169611
																																				TPPP3	1.03165e-19	2.63481	0.864	0.573	2.0633e-16	0.0967809	0.0595695	13.5733	0.0247577	0.0397789	0.195711	0.0265011	0.0289839
																																				TRAF3IP1	5.01903e-18	1.43645	0.955	0.758	1.00381e-14	1.18739	1.86386	10.7317	1.89984	1.70371	1.84391	0.807597	0.662178
																																				TRIM55	1.62832e-06	0.642617	0.545	0.251	0.00325663	0.0164423	0.00021049	0.908014	0.00125382	0.0083286	0.00527748	0	4.37786e-08
																																				TSGA10	5.16095e-12	1.41858	0.795	0.597	1.03219e-08	0.127992	0.242756	4.10087	0.270675	0.18445	0.30212	0.015127	0.0272634
																																				TSNAXIP1	6.86612e-08	0.379679	0.568	0.244	0.000137322	4.36551e-06	5.79954e-05	0.473539	0.0157289	0.00869329	-4.39749e-05	0.00344179	0.0164038
																																				TSPAN1	7.91468e-12	0.927966	0.977	0.875	1.58294e-08	6.29253	7.95624	25.218	6.01966	23.8006	6.21084	0.313763	0.528296
																																				TTC25	6.16146e-22	1.75135	0.864	0.383	1.23229e-18	0.00999872	0.0402232	4.90388	0.00848543	0.0452059	0.0241071	0.0225382	0.0397673
																																				TTC29	8.41553e-15	0.832154	0.727	0.409	1.68311e-11	0.00276818	0.0203128	1.32379	0.00828356	0.00447199	0.00183843	0.000146668	5.52218e-05
																																				TUBA1A	7.88388e-19	1.76738	0.932	0.667	1.57678e-15	1.2068	1.32195	11.0634	0.89173	0.873793	1.1747	6.12751	2.59019
																																				TUBA4B	3.05505e-241	0.945457	0.705	0.005	6.1101e-238	8.28556e-05	9.66424e-07	1.585	0.0100088	9.5583e-05	0.00587116	0.0133541	9.47252e-07
																																				TUBB4B	1.11956e-15	1.44886	0.977	0.842	2.23912e-12	6.70901	3.58592	17.563	2.79131	2.3205	3.09539	6.06116	1.8877
																																				UGCG	8.78212e-08	0.318597	0.864	0.678	0.000175642	1.82459	2.05433	2.36522	0.915108	1.38811	1.31293	0.670463	0.735199
																																				USP13	3.69087e-09	0.673039	0.682	0.523	7.38173e-06	0.172157	0.0455425	1.04297	0.0224279	0.00754418	0.041743	0.910525	0.223016
																																				VWA3A	7.65034e-77	0.776322	0.75	0.002	1.53007e-73	-0.00264643	0.0042828	1.17944	0.00312269	0.00183624	0.0353026	2.81759e-06	-4.83697e-05
																																				WDR63	3.93417e-12	0.463688	0.682	0.362	7.86833e-09	0.0156426	0.00291716	0.596897	0.00381841	0.00193437	0.0238122	0.0192533	0.0270752
																																				WDR66	3.17541e-11	1.14452	0.818	0.617	6.35082e-08	0.188144	0.782664	3.51641	0.269439	0.326038	0.577215	0.262922	0.286134
																																				WDR78	5.35407e-18	1.61631	0.864	0.522	1.07081e-14	0.187505	0.377375	5.20003	0.127103	0.237922	0.358219	0.140388	0.209231
																																				WDR86-AS1	9.83399e-15	0.844807	0.727	0.281	1.9668e-11	0.00403844	0.062756	1.40267	0.0129425	0.0388666	0.136359	0.0731242	0.177451
																																				ZBBX	1.39842e-23	1.57107	0.864	0.348	2.79685e-20	-0.00557755	0.0184253	3.99782	0.0254444	0.148017	0.129738	1.42607e-05	0.00169968
																																				ZBED2	1.32057e-10	0.254176	0.773	0.525	2.64113e-07	0.0682861	0.0824187	0.515486	0.14927	0.518428	0.425957	0.000248592	0.00178111
																																				ZMYND10	2.01557e-41	1.27474	0.705	0.022	4.03113e-38	0.00822065	0.0327199	2.62739	0.00599422	-0.00114439	-0.00875231	-5.03875e-05	0.00935102
																																				ZNF295-AS1	1.71797e-17	0.633262	0.705	0.285	3.43595e-14	-0.000510798	1.44041e-05	0.886558	0.00390086	-0.0007998	0.00129069	0.000116454	-0.00011067
[truncated: 37 more columns]
