# Supplementary material for: Modelling the impact of decidual senescence on embryo implantation in human endometrial assembloids
Source: eLife. 2021 Sep 6;10:e69603. doi: 10.7554/eLife.69603 (PMC8523170; doi:10.7554/eLife.69603)
Supplement: Figure 3—source data 2. [file elife-69603-fig3-data2.xlsx]

## Sheet: Figure 3-Source Data 2
Figure 3-Source Data 2: GO analysis of differentiated sub-populations
Supports Figure 3 panels D and F
GO analysis results for EpS4									GO analysis results for EpS5									GO analysis results for TP									GO analysis results for SS3									GO analysis results for SS4									GO analysis results for SS5
Analysis Type:	PANTHER Overrepresentation Test (Released 20200728)								Analysis Type:	PANTHER Overrepresentation Test (Released 20200728)								Analysis Type:	PANTHER Overrepresentation Test (Released 20200728)								Analysis Type:	PANTHER Overrepresentation Test (Released 20200728)								Analysis Type:	PANTHER Overrepresentation Test (Released 20200407)								Analysis Type:	PANTHER Overrepresentation Test (Released 20200407)
Annotation Version and Release Date:	GO Ontology database DOI: 10.5281/zenodo.4081749 Released 2020-10-09								Annotation Version and Release Date:	GO Ontology database DOI: 10.5281/zenodo.4081749 Released 2020-10-09								Annotation Version and Release Date:	GO Ontology database DOI: 10.5281/zenodo.4081749 Released 2020-10-09								Annotation Version and Release Date:	GO Ontology database DOI: 10.5281/zenodo.4081749 Released 2020-10-09								Annotation Version and Release Date:	GO Ontology database DOI: 10.5281/zenodo.3873405 Released 2020-06-01								Annotation Version and Release Date:	GO Ontology database DOI: 10.5281/zenodo.3873405 Released 2020-06-01
Analyzed List:	upload_1 (Homo sapiens)								Analyzed List:	upload_1 (Homo sapiens)								Analyzed List:	upload_1 (Homo sapiens)								Analyzed List:	upload_1 (Homo sapiens)								Analyzed List:	SS4 (Homo sapiens)								Analyzed List:	SS5 (Homo sapiens)
Reference List:	Homo sapiens (all genes in database)								Reference List:	Homo sapiens (all genes in database)								Reference List:	Homo sapiens (all genes in database)								Reference List:	Homo sapiens (all genes in database)								Reference List:	Homo sapiens (all genes in database)								Reference List:	Homo sapiens (all genes in database)
Test Type:	FISHER								Test Type:	FISHER								Test Type:	FISHER								Test Type:	FISHER								Test Type:	FISHER								Test Type:	FISHER
Correction:	FDR								Correction:	FDR								Correction:	FDR								Correction:	FDR								Correction:	FDR								Correction:	FDR
GO biological process complete	Homo sapiens - REFLIST (20595)	upload_1 (180)	upload_1 (expected)	upload_1 (over/under)	upload_1 (fold Enrichment)	upload_1 (raw P-value)	upload_1 (FDR)		GO biological process complete	Homo sapiens - REFLIST (20595)	upload_1 (231)	upload_1 (expected)	upload_1 (over/under)	upload_1 (fold Enrichment)	upload_1 (raw P-value)	upload_1 (FDR)		GO biological process complete	Homo sapiens - REFLIST (20595)	upload_1 (179)	upload_1 (expected)	upload_1 (over/under)	upload_1 (fold Enrichment)	upload_1 (raw P-value)	upload_1 (FDR)		GO biological process complete	Homo sapiens - REFLIST (20595)	upload_1 (103)	upload_1 (expected)	upload_1 (over/under)	upload_1 (fold Enrichment)	upload_1 (raw P-value)	upload_1 (FDR)		GO biological process complete	Homo sapiens reference genes (20851)	Genes (178)	Fold Enrichment	Raw p-value	False Discovery Rate p-value				GO biological process complete	Homo sapiens reference genes (20851)	Genes (267)	Fold Enrichment	Raw p-value
stress response to metal ion (GO:0097501)	18	7	0.16	+	44.5	1.37e-09	5.45e-06		tissue development (GO:0009888)	1762	68	19.76	+	3.44	1.1e-19	1.74e-15		extracellular structure organization (GO:0043062)	364	44	3.16	+	13.91	1.12e-35	8.87e-32		extracellular structure organization (GO:0043062)	364	17	1.82	+	9.34	6.1e-12	3.22e-08		Extracellular structure organization (GO:0043062)	362	29	9.38	3.43e-19	2.74e-15				Negative regulation of biological process (GO:0048519)	5530	151	2.13	1.62e-24
stress response to copper ion (GO:1990169)	16	7	0.14	+	50.06	7.11e-10	5.64e-06		regulation of cell migration (GO:0030334)	894	43	10.03	+	4.29	1.61e-15	1.28e-11		extracellular matrix organization (GO:0030198)	363	44	3.15	+	13.95	1e-35	1.59e-31		system development (GO:0048731)	4313	53	21.57	+	2.46	9.51e-12	3.77e-08		Extracellular matrix organization (GO:0030198)	361	29	9.41	3.2e-19	5.11e-15				Regulation of multicellular organismal process (GO:0051239)	3237	108	2.61	2.57e-22
detoxification of inorganic compound (GO:0061687)	18	7	0.16	+	44.5	1.37e-09	7.27e-06		regulation of cell motility (GO:2000145)	956	44	10.72	+	4.1	3.25e-15	1.72e-11		anatomical structure development (GO:0048856)	5294	101	46.01	+	2.2	6.89e-18	3.64e-14		response to oxygen levels (GO:0070482)	381	17	1.91	+	8.92	1.22e-11	3.86e-08		Regulation of multicellular organismal development (GO:2000026)	2099	54	3.01	9.41e-14	5.01e-10				Response to organic substance (GO:0010033)	3040	101	2.59	1.76e-20
cellular zinc ion homeostasis (GO:0006882)	34	8	0.3	+	26.92	2.49e-09	7.91e-06		regulation of locomotion (GO:0040012)	998	44	11.19	+	3.93	1.4e-14	5.56e-11		developmental process (GO:0032502)	5757	105	50.04	+	2.1	1.57e-17	6.23e-14		negative regulation of biological process (GO:0048519)	5581	62	27.91	+	2.22	2.56e-12	4.06e-08		Regulation of developmental process (GO:0050793)	2663	61	2.68	2.03e-13	8.09e-10				Regulation of cell population proliferation (GO:0042127)	1668	73	3.42	1.41e-20
detoxification of copper ion (GO:0010273)	16	7	0.14	+	50.06	7.11e-10	1.13e-05		regulation of cellular component movement (GO:0051270)	1035	44	11.61	+	3.79	4.78e-14	1.52e-10		system development (GO:0048731)	4313	88	37.49	+	2.35	9.41e-17	2.98e-13		extracellular matrix organization (GO:0030198)	363	17	1.82	+	9.36	5.85e-12	4.64e-08		System development (GO:0048731)	4490	82	2.14	6.55e-13	2.09e-09				Negative regulation of cellular process (GO:0048523)	4873	131	2.1	1.28e-19
chemical homeostasis (GO:0048878)	1127	32	9.85	+	3.25	5.16e-09	1.17e-05		epidermis development (GO:0008544)	423	28	4.74	+	5.9	1.72e-13	3.91e-10		cell adhesion (GO:0007155)	945	40	8.21	+	4.87	1.28e-16	3.39e-13		tube development (GO:0035295)	860	23	4.3	+	5.35	4.87e-11	9.66e-08		Regulation of multicellular organismal process (GO:0051239)	3237	67	2.42	9.05e-13	2.41e-09				Tissue development (GO:0009888)	1774	73	3.21	4.04e-19
zinc ion homeostasis (GO:0055069)	37	8	0.32	+	24.74	4.45e-09	1.18e-05		epithelium development (GO:0060429)	1121	45	12.57	+	3.58	1.64e-13	4.35e-10		biological adhesion (GO:0022610)	951	40	8.27	+	4.84	1.58e-16	3.58e-13		animal organ development (GO:0048513)	3244	44	16.22	+	2.71	8e-11	9.77e-08		Negative regulation of multicellular organismal process (GO:0051241)	1235	39	3.7	1.61e-12	3.67e-09				Response to stimulus (GO:0050896)	8523	182	1.67	4.87e-19
cellular response to zinc ion (GO:0071294)	25	7	0.22	+	32.04	9.14e-09	1.81e-05		cell adhesion (GO:0007155)	945	40	10.6	+	3.77	9.27e-13	1.63e-09		multicellular organism development (GO:0007275)	4899	93	42.58	+	2.18	7.18e-16	1.42e-12		developmental process (GO:0032502)	5757	61	28.79	+	2.12	5.63e-11	9.93e-08		Multicellular organism development (GO:0007275)	5086	86	1.98	7.95e-12	1.59e-08				Cellular response to organic substance (GO:0071310)	2378	83	2.73	1.2e-17
positive regulation of cell communication (GO:0010647)	1723	40	15.06	+	2.66	1.26e-08	2.22e-05		epithelial cell differentiation (GO:0030855)	683	34	7.66	+	4.44	8.42e-13	1.67e-09		regulation of developmental process (GO:0050793)	2465	61	21.42	+	2.85	1.54e-14	2.72e-11		regulation of multicellular organismal process (GO:0051239)	2696	40	13.48	+	2.97	6.41e-11	1.02e-07		Anatomical structure development (GO:0048856)	5478	89	1.9	2.81e-11	4.99e-08				Developmental process (GO:0032502)	5935	143	1.88	1.62e-17
response to organic substance (GO:0010033)	3006	56	26.27	+	2.13	1.94e-08	3.08e-05		biological adhesion (GO:0022610)	951	40	10.67	+	3.75	1.12e-12	1.78e-09		regulation of multicellular organismal process (GO:0051239)	2696	64	23.43	+	2.73	1.76e-14	2.79e-11		multicellular organismal process (GO:0032501)	6972	68	34.87	+	1.95	3.86e-11	1.02e-07		Negative regulation of cellular process (GO:0048523)	4873	82	1.97	5.23e-11	8.35e-08				Regulation of developmental process (GO:0050793)	2663	88	2.58	2.34e-17
cellular response to copper ion (GO:0071280)	29	7	0.25	+	27.62	2.2e-08	3.18e-05		regulation of cell population proliferation (GO:0042127)	1666	54	18.69	+	2.89	1.63e-12	2.35e-09		anatomical structure morphogenesis (GO:0009653)	2180	56	18.95	+	2.96	6.32e-14	9.11e-11		tissue development (GO:0009888)	1762	32	8.81	+	3.63	7.8e-11	1.03e-07		Negative regulation of developmental process (GO:0051093)	981	32	3.82	1.02e-10	1.36e-07				Regulation of localization (GO:0032879)	2846	91	2.5	4.35e-17
positive regulation of signal transduction (GO:0009967)	1561	37	13.64	+	2.71	2.97e-08	3.93e-05		system development (GO:0048731)	4313	95	48.38	+	1.96	5.73e-12	7.58e-09		multicellular organismal process (GO:0032501)	6972	109	60.6	+	1.8	2.45e-13	2.77e-10		multicellular organism development (GO:0007275)	4899	56	24.5	+	2.29	4.59e-11	1.04e-07		Negative regulation of biological process (GO:0048519)	5530	88	1.86	1.12e-10	1.38e-07				Extracellular structure organization (GO:0043062)	362	32	6.9	6.08e-17
positive regulation of signaling (GO:0023056)	1730	39	15.12	+	2.58	4.34e-08	4.92e-05		anatomical structure development (GO:0048856)	5294	108	59.38	+	1.82	7.71e-12	9.41e-09		animal organ development (GO:0048513)	3244	69	28.19	+	2.45	2.38e-13	2.91e-10		anatomical structure development (GO:0048856)	5294	58	26.48	+	2.19	7.7e-11	1.11e-07		Developmental process (GO:0032502)	5935	92	1.82	1e-10	1.46e-07				Extracellular matrix organization (GO:0030198)	361	32	6.92	5.65e-17
regulation of biological quality (GO:0065008)	4013	67	35.07	+	1.91	4.14e-08	5.05e-05		cell migration (GO:0016477)	973	39	10.91	+	3.57	9.2e-12	1.04e-08		negative regulation of multicellular organismal process (GO:0051241)	1022	37	8.88	+	4.17	2.26e-13	2.99e-10		vasculature development (GO:0001944)	525	18	2.63	+	6.86	1.82e-10	2.07e-07		Multicellular organismal process (GO:0032501)	7109	101	1.66	8.67e-10	9.89e-07				Cellular response to chemical stimulus (GO:0070887)	2941	92	2.44	1.34e-16
detoxification (GO:0098754)	132	11	1.15	+	9.53	4.88e-08	5.16e-05		animal organ development (GO:0048513)	3244	78	36.39	+	2.14	2.15e-11	2.28e-08		skeletal system development (GO:0001501)	488	26	4.24	+	6.13	3.74e-13	3.96e-10		response to hypoxia (GO:0001666)	343	15	1.72	+	8.74	2.85e-10	3.02e-07		Collagen fibril organization (GO:0030199)	48	9	21.96	1.16e-09	1.23e-06				Regulation of cellular component movement (GO:0051270)	1025	51	3.89	2.05e-16
transition metal ion homeostasis (GO:0055076)	134	11	1.17	+	9.39	5.63e-08	5.58e-05		developmental process (GO:0032502)	5757	113	64.57	+	1.75	2.56e-11	2.54e-08		regulation of cell migration (GO:0030334)	894	34	7.77	+	4.38	6.67e-13	6.61e-10		circulatory system development (GO:0072359)	871	22	4.36	+	5.05	3.96e-10	3.92e-07		Regulation of cell communication (GO:0010646)	3625	65	2.1	1.88e-09	1.88e-06				Response to oxygen levels (GO:0070482)	385	32	6.49	3.12e-16
positive regulation of response to stimulus (GO:0048584)	2295	46	20.06	+	2.29	7.49e-08	6.26e-05		regulation of cellular component organization (GO:0051128)	2367	63	26.55	+	2.37	6.89e-11	6.43e-08		response to organic substance (GO:0010033)	3006	65	26.13	+	2.49	1.06e-12	9.91e-10		response to decreased oxygen levels (GO:0036293)	355	15	1.78	+	8.45	4.5e-10	3.96e-07		Regulation of signaling (GO:0023051)	3664	65	2.08	2.28e-09	2.14e-06				Anatomical structure development (GO:0048856)	5478	133	1.9	3.95e-16
response to zinc ion (GO:0010043)	56	8	0.49	+	16.35	7.95e-08	6.31e-05		multicellular organism development (GO:0007275)	4899	100	54.95	+	1.82	9.84e-11	8.67e-08		cellular response to organic substance (GO:0071310)	2350	56	20.42	+	2.74	1.33e-12	1.17e-09		response to organic substance (GO:0010033)	3006	41	15.03	+	2.73	4.39e-10	4.09e-07		Animal organ development (GO:0048513)	3242	60	2.17	2.45e-09	2.17e-06				Regulation of locomotion (GO:0040012)	980	49	3.9	7.34e-16
response to hormone (GO:0009725)	816	25	7.13	+	3.51	7.46e-08	6.58e-05		locomotion (GO:0040011)	1340	44	15.03	+	2.93	1.96e-10	1.63e-07		regulation of cellular component movement (GO:0051270)	1035	36	9	+	4	1.57e-12	1.31e-09		response to abiotic stimulus (GO:0009628)	1162	25	5.81	+	4.3	5.39e-10	4.5e-07		Regulation of anatomical structure morphogenesis (GO:0022603)	1112	31	3.27	8.09e-09	6.8e-06				Regulation of cellular process (GO:0050794)	11160	207	1.45	7.79e-16
anatomical structure development (GO:0048856)	5294	80	46.27	+	1.73	7.15e-08	6.67e-05		epidermal cell differentiation (GO:0009913)	319	21	3.58	+	5.87	2.37e-10	1.88e-07		regulation of cell population proliferation (GO:0042127)	1666	46	14.48	+	3.18	1.97e-12	1.56e-09		blood vessel development (GO:0001568)	502	17	2.51	+	6.77	7.42e-10	5.88e-07		Positive regulation of biological process (GO:0048518)	6306	91	1.69	9.22e-09	7.36e-06				Regulation of cell motility (GO:2000145)	940	48	3.99	7.03e-16
response to endogenous stimulus (GO:0009719)	1417	34	12.38	+	2.75	9.11e-08	6.88e-05		anatomical structure morphogenesis (GO:0009653)	2180	59	24.45	+	2.41	2.54e-10	1.92e-07		regulation of locomotion (GO:0040012)	998	35	8.67	+	4.04	2.7e-12	2.04e-09		regulation of cellular component movement (GO:0051270)	1035	23	5.18	+	4.44	1.67e-09	1.26e-06		Cell surface receptor signaling pathway (GO:0007166)	2519	50	2.33	1.06e-08	8.07e-06				Regulation of cell migration (GO:0030334)	877	46	4.1	1.2e-15
inorganic ion homeostasis (GO:0098771)	715	23	6.25	+	3.68	1.13e-07	6.89e-05		regulation of cell adhesion (GO:0030155)	721	31	8.09	+	3.83	3.13e-10	2.26e-07		regulation of cell motility (GO:2000145)	956	34	8.31	+	4.09	4.03e-12	2.9e-09		regulation of cell population proliferation (GO:0042127)	1666	29	8.33	+	3.48	2.07e-09	1.49e-06		Cellular response to chemical stimulus (GO:0070887)	2941	55	2.19	1.49e-08	1.08e-05				Response to abiotic stimulus (GO:0009628)	1174	53	3.53	2.31e-15
developmental process (GO:0032502)	5757	84	50.32	+	1.67	1.09e-07	6.91e-05		cell motility (GO:0048870)	1106	39	12.41	+	3.14	3.53e-10	2.34e-07		tube development (GO:0035295)	860	32	7.47	+	4.28	6.12e-12	4.22e-09		anatomical structure formation involved in morphogenesis (GO:0048646)	889	21	4.45	+	4.72	3.39e-09	2.34e-06		Cellular response to organic substance (GO:0071310)	2378	48	2.36	1.87e-08	1.3e-05				Positive regulation of cell population proliferation (GO:0008284)	935	47	3.93	2.6e-15
cellular transition metal ion homeostasis (GO:0046916)	111	10	0.97	+	10.31	1.02e-07	7.06e-05		localization of cell (GO:0051674)	1106	39	12.41	+	3.14	3.53e-10	2.44e-07		cellular developmental process (GO:0048869)	3593	70	31.23	+	2.24	9.13e-12	6.04e-09		anatomical structure morphogenesis (GO:0009653)	2180	33	10.9	+	3.03	3.7e-09	2.45e-06		Anatomical structure morphogenesis (GO:0009653)	2189	45	2.41	2.4e-08	1.6e-05				Regulation of biological process (GO:0050789)	11714	212	1.41	2.72e-15
positive regulation of intracellular signal transduction (GO:1902533)	1016	28	8.88	+	3.15	9.8e-08	7.07e-05		response to stimulus (GO:0050896)	8502	143	95.36	+	1.5	3.97e-10	2.52e-07		positive regulation of cell migration (GO:0030335)	523	25	4.55	+	5.5	1.05e-11	6.67e-09		regulation of locomotion (GO:0040012)	998	22	4.99	+	4.41	4.65e-09	2.95e-06		Response to endogenous stimulus (GO:0009719)	1458	35	2.81	3.1e-08	1.98e-05				Regulation of cell adhesion (GO:0030155)	720	41	4.45	3.84e-15
system development (GO:0048731)	4313	69	37.7	+	1.83	1.08e-07	7.17e-05		positive regulation of biological process (GO:0048518)	6275	116	70.38	+	1.65	5.95e-10	3.63e-07		vasculature development (GO:0001944)	525	25	4.56	+	5.48	1.14e-11	6.94e-09		response to stress (GO:0006950)	3648	44	18.24	+	2.41	5.09e-09	3.1e-06		Response to organic substance (GO:0010033)	3040	55	2.12	4.79e-08	2.73e-05				Cellular response to stimulus (GO:0051716)	6610	147	1.74	5.69e-15
multicellular organismal process (GO:0032501)	6972	96	60.94	+	1.58	1.24e-07	7.31e-05		regulation of localization (GO:0032879)	2771	67	31.08	+	2.16	8.27e-10	4.86e-07		negative regulation of developmental process (GO:0051093)	887	32	7.71	+	4.15	1.33e-11	7.55e-09		negative regulation of multicellular organismal process (GO:0051241)	1022	22	5.11	+	4.3	7.1e-09	4.17e-06		Regulation of cell motility (GO:2000145)	940	27	3.36	4.7e-08	2.78e-05				Response to stress (GO:0006950)	3654	101	2.16	6.05e-15
cellular response to cadmium ion (GO:0071276)	39	7	0.34	+	20.54	1.31e-07	7.44e-05		cellular developmental process (GO:0048869)	3593	79	40.3	+	1.96	1.05e-09	5.94e-07		tissue development (GO:0009888)	1762	46	15.31	+	3	1.3e-11	7.65e-09		regulation of localization (GO:0032879)	2771	37	13.86	+	2.67	8.56e-09	4.85e-06		Regulation of cell migration (GO:0030334)	877	26	3.47	4.68e-08	2.87e-05				Biological regulation (GO:0065007)	12390	219	1.38	5.66e-15
cellular response to chemical stimulus (GO:0070887)	2924	53	25.56	+	2.07	1.52e-07	7.78e-05		multicellular organismal process (GO:0032501)	6972	124	78.2	+	1.59	1.13e-09	6.18e-07		response to wounding (GO:0009611)	540	25	4.69	+	5.33	2.03e-11	1.11e-08		regulation of cell motility (GO:2000145)	956	21	4.78	+	4.39	1.18e-08	6.44e-06		Cellular process (GO:0009987)	15430	161	1.22	6.22e-08	3.43e-05				Anatomical structure morphogenesis (GO:0009653)	2189	74	2.64	6.86e-15
regulation of cell death (GO:0010941)	1665	37	14.55	+	2.54	1.49e-07	7.87e-05		positive regulation of cell motility (GO:2000147)	546	26	6.12	+	4.25	1.25e-09	6.62e-07		positive regulation of cellular process (GO:0048522)	5685	92	49.41	+	1.86	2.31e-11	1.22e-08		negative regulation of cell population proliferation (GO:0008285)	698	18	3.49	+	5.16	1.43e-08	7.54e-06		Regulation of vasculature development (GO:1901342)	340	16	5.51	6.58e-08	3.5e-05				Response to hypoxia (GO:0001666)	347	29	6.53	7.37e-15
multicellular organism development (GO:0007275)	4899	75	42.82	+	1.75	1.46e-07	7.97e-05		cornification (GO:0070268)	113	13	1.27	+	10.26	1.55e-09	7.93e-07		negative regulation of biological process (GO:0048519)	5581	91	48.51	+	1.88	2.82e-11	1.28e-08		response to wounding (GO:0009611)	540	16	2.7	+	5.92	1.54e-08	7.88e-06		Skeletal system development (GO:0001501)	489	19	4.55	6.79e-08	3.5e-05				Response to chemical (GO:0042221)	4423	114	2.01	7.14e-15
regulation of growth (GO:0040008)	675	22	5.9	+	3.73	1.76e-07	8.44e-05		regulation of multicellular organismal process (GO:0051239)	2696	65	30.24	+	2.15	1.87e-09	9.29e-07		positive regulation of biological process (GO:0048518)	6275	98	54.54	+	1.8	2.58e-11	1.28e-08		positive regulation of cell motility (GO:2000147)	546	16	2.73	+	5.86	1.79e-08	8.87e-06		Positive regulation of cellular process (GO:0048522)	5737	83	1.69	7.3e-08	3.53e-05				Regulation of multicellular organismal development (GO:2000026)	2099	72	2.68	8.82e-15
regulation of programmed cell death (GO:0043067)	1528	35	13.35	+	2.62	1.71e-07	8.48e-05		positive regulation of cellular component movement (GO:0051272)	559	26	6.27	+	4.15	2.01e-09	9.64e-07		positive regulation of cell motility (GO:2000147)	546	25	4.75	+	5.27	2.54e-11	1.3e-08		regulation of cell migration (GO:0030334)	894	20	4.47	+	4.47	2.07e-08	9.94e-06		Regulation of cellular component movement (GO:0051270)	1025	28	3.2	7.16e-08	3.57e-05				Regulation of cell communication (GO:0010646)	3625	100	2.15	1.01e-14
response to chemical (GO:0042221)	4392	69	38.39	+	1.8	2.24e-07	0.000105		positive regulation of locomotion (GO:0040017)	561	26	6.29	+	4.13	2.15e-09	1e-06		response to oxygen-containing compound (GO:1901700)	1596	43	13.87	+	3.1	2.73e-11	1.31e-08		biological regulation (GO:0065007)	12575	89	62.89	+	1.42	2.16e-08	1.01e-05		Regulation of response to stimulus (GO:0048583)	4371	69	1.85	8.35e-08	3.92e-05				Response to decreased oxygen levels (GO:0036293)	360	29	6.29	1.77e-14
cellular chemical homeostasis (GO:0055082)	749	23	6.55	+	3.51	2.51e-07	0.000114		positive regulation of cell migration (GO:0030335)	523	25	5.87	+	4.26	2.47e-09	1.12e-06		blood vessel development (GO:0001568)	502	24	4.36	+	5.5	2.82e-11	1.31e-08		positive regulation of cellular component movement (GO:0051272)	559	16	2.8	+	5.72	2.46e-08	1.11e-05		Response to oxygen-containing compound (GO:1901700)	1604	36	2.63	9.93e-08	4.53e-05				Positive regulation of cell motility (GO:2000147)	550	35	4.97	2.26e-14
response to cadmium ion (GO:0046686)	67	8	0.59	+	13.66	2.8e-07	0.00012		secretion (GO:0046903)	1092	37	12.25	+	3.02	3.04e-09	1.34e-06		regulation of cell communication (GO:0010646)	3432	67	29.83	+	2.25	3.17e-11	1.4e-08		positive regulation of locomotion (GO:0040017)	561	16	2.81	+	5.7	2.58e-08	1.14e-05		Regulation of angiogenesis (GO:0045765)	307	15	5.72	1.08e-07	4.68e-05				Regulation of signaling (GO:0023051)	3664	100	2.13	2.36e-14
response to copper ion (GO:0046688)	44	7	0.38	+	18.2	2.74e-07	0.000121		cell differentiation (GO:0030154)	3537	77	39.67	+	1.94	3.94e-09	1.6e-06		positive regulation of cellular component movement (GO:0051272)	559	25	4.86	+	5.15	4.11e-11	1.72e-08		blood vessel morphogenesis (GO:0048514)	415	14	2.08	+	6.75	2.81e-08	1.17e-05		Regulation of locomotion (GO:0040012)	980	27	3.23	1.07e-07	4.74e-05				Negative regulation of cell communication (GO:0010648)	1429	57	3.12	2.85e-14
regulation of response to stimulus (GO:0048583)	4275	67	37.36	+	1.79	4.47e-07	0.000187		neutrophil activation (GO:0042119)	494	24	5.54	+	4.33	3.9e-09	1.63e-06		circulatory system development (GO:0072359)	871	31	7.57	+	4.09	4.05e-11	1.74e-08		response to stimulus (GO:0050896)	8502	71	42.52	+	1.67	2.75e-08	1.18e-05		Cell differentiation (GO:0030154)	3761	62	1.93	1.27e-07	5.33e-05				Negative regulation of signaling (GO:0023057)	1432	57	3.11	3.1e-14
regulation of cellular component movement (GO:0051270)	1035	27	9.05	+	2.98	4.9e-07	0.000199		movement of cell or subcellular component (GO:0006928)	1592	46	17.86	+	2.58	3.82e-09	1.64e-06		positive regulation of locomotion (GO:0040017)	561	25	4.88	+	5.13	4.42e-11	1.8e-08		regulation of biological process (GO:0050789)	11904	86	59.53	+	1.44	3.38e-08	1.37e-05		Response to lipid (GO:0033993)	871	25	3.36	1.59e-07	6.49e-05				Positive regulation of biological process (GO:0048518)	6306	141	1.75	3.54e-14
ion homeostasis (GO:0050801)	786	23	6.87	+	3.35	5.68e-07	0.000225		granulocyte activation (GO:0036230)	498	24	5.59	+	4.3	4.53e-09	1.8e-06		cell differentiation (GO:0030154)	3537	68	30.74	+	2.21	5.01e-11	1.99e-08		tube morphogenesis (GO:0035239)	664	17	3.32	+	5.12	4.18e-08	1.66e-05		Cellular developmental process (GO:0048869)	3815	62	1.9	1.68e-07	6.69e-05				Positive regulation of locomotion (GO:0040017)	565	35	4.84	4.78e-14
homeostatic process (GO:0042592)	1668	36	14.58	+	2.47	6.44e-07	0.000249		skin development (GO:0043588)	381	21	4.27	+	4.91	4.82e-09	1.82e-06		regulation of cell differentiation (GO:0045595)	1573	42	13.67	+	3.07	6.49e-11	2.51e-08		wound healing (GO:0042060)	439	14	2.2	+	6.38	5.52e-08	2.14e-05		Cellular response to oxygen-containing compound (GO:1901701)	1073	28	3.06	1.79e-07	6.99e-05				Positive regulation of cellular component movement (GO:0051272)	566	35	4.83	5.02e-14
regulation of locomotion (GO:0040012)	998	26	8.72	+	2.98	8.39e-07	0.00031		myeloid leukocyte activation (GO:0002274)	584	26	6.55	+	3.97	4.78e-09	1.85e-06		regulation of signaling (GO:0023051)	3468	67	30.14	+	2.22	7.05e-11	2.66e-08		positive regulation of cell migration (GO:0030335)	523	15	2.62	+	5.73	6.85e-08	2.59e-05		Response to external stimulus (GO:0009605)	2526	47	2.18	2.2e-07	8.35e-05				Tube development (GO:0035295)	863	43	3.89	6.28e-14
negative regulation of programmed cell death (GO:0043069)	932	25	8.15	+	3.07	8.34e-07	0.000315		export from cell (GO:0140352)	1024	35	11.49	+	3.05	6.96e-09	2.57e-06		negative regulation of cellular process (GO:0048523)	4946	83	42.99	+	1.93	9.82e-11	3.62e-08		regulation of cellular process (GO:0050794)	11345	83	56.74	+	1.46	7.84e-08	2.89e-05		Regulation of cell differentiation (GO:0045595)	1876	39	2.44	2.25e-07	8.36e-05				Negative regulation of response to stimulus (GO:0048585)	1837	65	2.76	6.64e-14
regulation of apoptotic process (GO:0042981)	1495	33	13.07	+	2.53	9.26e-07	0.000334		secretion by cell (GO:0032940)	976	34	10.95	+	3.11	7.45e-09	2.69e-06		response to stimulus (GO:0050896)	8502	117	73.89	+	1.58	1.21e-10	4.36e-08		negative regulation of cellular process (GO:0048523)	4946	50	24.74	+	2.02	8.34e-08	3.01e-05		Regulation of localization (GO:0032879)	2846	51	2.1	2.54e-07	9.23e-05				Regulation of response to stimulus (GO:0048583)	4371	110	1.97	1.27e-13
cation homeostasis (GO:0055080)	704	21	6.15	+	3.41	1.36e-06	0.000442		positive regulation of cellular process (GO:0048522)	5685	105	63.76	+	1.65	8.72e-09	3.01e-06		cell migration (GO:0016477)	973	32	8.46	+	3.78	1.32e-10	4.66e-08		cellular response to chemical stimulus (GO:0070887)	2924	36	14.62	+	2.46	1.2e-07	4.25e-05		Positive regulation of signaling (GO:0023056)	1908	39	2.39	3.15e-07	0.000112				Multicellular organismal process (GO:0032501)	7109	151	1.66	1.39e-13
regulation of cell migration (GO:0030334)	894	24	7.81	+	3.07	1.4e-06	0.000443		immune system process (GO:0002376)	2856	66	32.03	+	2.06	8.63e-09	3.04e-06		regulation of response to stimulus (GO:0048583)	4275	75	37.16	+	2.02	2.13e-10	7.34e-08		response to hormone (GO:0009725)	816	18	4.08	+	4.41	1.43e-07	4.93e-05		Cell migration (GO:0016477)	972	26	3.13	3.29e-07	0.000114				Positive regulation of cell migration (GO:0030335)	525	33	4.91	1.84e-13
positive regulation of biological process (GO:0048518)	6275	86	54.84	+	1.57	1.31e-06	0.000443		regulation of response to stimulus (GO:0048583)	4275	86	47.95	+	1.79	1.19e-08	3.94e-06		cellular response to chemical stimulus (GO:0070887)	2924	59	25.41	+	2.32	2.5e-10	8.44e-08		positive regulation of vasculature development (GO:1904018)	158	9	0.79	+	11.39	1.53e-07	4.96e-05		Negative regulation of cell differentiation (GO:0045596)	724	22	3.56	3.73e-07	0.000124				Negative regulation of multicellular organismal process (GO:0051241)	1235	51	3.22	2.4e-13
negative regulation of cell death (GO:0060548)	1025	26	8.96	+	2.9	1.36e-06	0.00045		positive regulation of response to stimulus (GO:0048584)	2295	57	25.74	+	2.21	1.18e-08	3.98e-06		positive regulation of cell population proliferation (GO:0008284)	941	31	8.18	+	3.79	2.58e-10	8.53e-08		positive regulation of angiogenesis (GO:0045766)	158	9	0.79	+	11.39	1.53e-07	5.06e-05		Negative regulation of epithelial cell proliferation (GO:0050680)	132	10	8.87	3.72e-07	0.000126				Cellular developmental process (GO:0048869)	3815	100	2.05	2.66e-13
regulation of cell motility (GO:2000145)	956	25	8.36	+	2.99	1.31e-06	0.000451		response to chemical (GO:0042221)	4392	87	49.26	+	1.77	1.78e-08	5.75e-06		regulation of signal transduction (GO:0009966)	3068	61	26.67	+	2.29	2.7e-10	8.73e-08		regulation of cell death (GO:0010941)	1665	26	8.33	+	3.12	1.51e-07	5.09e-05		Connective tissue development (GO:0061448)	209	12	6.73	4.21e-07	0.000137				Positive regulation of cell communication (GO:0010647)	1900	65	2.67	2.98e-13
cellular ion homeostasis (GO:0006873)	647	20	5.65	+	3.54	1.47e-06	0.000456		keratinocyte differentiation (GO:0030216)	269	17	3.02	+	5.63	2.29e-08	7.28e-06		response to lipid (GO:0033993)	844	29	7.34	+	3.95	4.14e-10	1.31e-07		response to chemical (GO:0042221)	4392	46	21.97	+	2.09	1.72e-07	5.47e-05		Response to organonitrogen compound (GO:0010243)	1011	26	3.01	6.81e-07	0.000218				Positive regulation of cellular process (GO:0048522)	5737	130	1.77	3.28e-13
cellular homeostasis (GO:0019725)	890	24	7.78	+	3.09	1.29e-06	0.000456		cell-cell adhesion (GO:0098609)	510	23	5.72	+	4.02	3.12e-08	9.71e-06		response to endogenous stimulus (GO:0009719)	1417	38	12.32	+	3.09	5.76e-10	1.79e-07		response to lipid (GO:0033993)	844	18	4.22	+	4.26	2.33e-07	7.24e-05		Positive regulation of cell communication (GO:0010647)	1900	38	2.34	7.5e-07	0.000235				Positive regulation of signaling (GO:0023056)	1908	65	2.66	3.59e-13
regulation of signal transduction (GO:0009966)	3068	52	26.81	+	1.94	1.64e-06	0.000501		myeloid cell activation involved in immune response (GO:0002275)	519	23	5.82	+	3.95	4.24e-08	1.29e-05		response to chemical (GO:0042221)	4392	75	38.17	+	1.96	6.88e-10	2.1e-07		regulation of angiogenesis (GO:0045765)	283	11	1.42	+	7.77	2.47e-07	7.53e-05		Negative regulation of cell population proliferation (GO:0008285)	701	21	3.51	8.77e-07	0.000269				Multicellular organism development (GO:0007275)	5086	120	1.84	5.01e-13
animal organ development (GO:0048513)	3244	54	28.35	+	1.9	1.68e-06	0.000504		regulation of molecular function (GO:0065009)	3067	67	34.4	+	1.95	4.82e-08	1.44e-05		cell development (GO:0048468)	1654	41	14.38	+	2.85	1.03e-09	3.07e-07		regulation of biological quality (GO:0065008)	4013	43	20.07	+	2.14	2.61e-07	7.82e-05		Regulation of cell population proliferation (GO:0042127)	1668	35	2.46	1.02e-06	0.000295				Regulation of cell differentiation (GO:0045595)	1876	64	2.66	5.42e-13
regulation of cell communication (GO:0010646)	3432	56	30	+	1.87	1.81e-06	0.000532		neutrophil degranulation (GO:0043312)	482	22	5.41	+	4.07	5.17e-08	1.52e-05		connective tissue development (GO:0061448)	209	15	1.82	+	8.26	1.06e-09	3.1e-07		regulation of vasculature development (GO:1901342)	286	11	1.43	+	7.69	2.73e-07	8.02e-05		Response to lipopolysaccharide (GO:0032496)	319	14	5.14	1e-06	0.000296				System development (GO:0048731)	4490	110	1.91	7.59e-13
negative regulation of apoptotic process (GO:0043066)	912	24	7.97	+	3.01	1.96e-06	0.000565		neutrophil activation involved in immune response (GO:0002283)	486	22	5.45	+	4.04	5.94e-08	1.71e-05		regulation of cell adhesion (GO:0030155)	721	26	6.27	+	4.15	1.4e-09	3.96e-07		cellular response to organic substance (GO:0071310)	2350	31	11.75	+	2.64	2.94e-07	8.18e-05		Cellular response to stimulus (GO:0051716)	6610	88	1.56	9.93e-07	0.000299				Animal organ development (GO:0048513)	3242	89	2.14	1.01e-12
response to toxic substance (GO:0009636)	239	12	2.09	+	5.74	2.06e-06	0.000583		negative regulation of cellular process (GO:0048523)	4946	93	55.48	+	1.68	6.6e-08	1.87e-05		regulation of cellular process (GO:0050794)	11345	138	98.6	+	1.4	1.38e-09	3.99e-07		reproductive structure development (GO:0048608)	428	13	2.14	+	6.07	2.94e-07	8.32e-05		Regulation of cell adhesion (GO:0030155)	720	21	3.42	1.33e-06	0.000378				Response to lipid (GO:0033993)	871	41	3.68	1.5e-12
positive regulation of cell motility (GO:2000147)	546	18	4.77	+	3.77	2.13e-06	0.000592		neutrophil mediated immunity (GO:0002446)	493	22	5.53	+	3.98	7.55e-08	2.1e-05		regulation of multicellular organismal development (GO:2000026)	1331	36	11.57	+	3.11	1.44e-09	4.01e-07		lung development (GO:0030324)	171	9	0.86	+	10.52	2.9e-07	8.36e-05		Response to cytokine (GO:0034097)	1124	27	2.81	1.46e-06	0.000409				Regulation of signal transduction (GO:0009966)	3147	87	2.16	1.91e-12
anatomical structure morphogenesis (GO:0009653)	2180	41	19.05	+	2.15	2.44e-06	0.000667		signaling (GO:0023052)	5504	100	61.73	+	1.62	8.23e-08	2.25e-05		regulation of cell-substrate adhesion (GO:0010810)	216	15	1.88	+	7.99	1.61e-09	4.41e-07		reproductive system development (GO:0061458)	432	13	2.16	+	6.02	3.26e-07	8.91e-05		Nervous system development (GO:0007399)	2422	44	2.13	1.56e-06	0.000422				Cell differentiation (GO:0030154)	3761	97	2.01	2.21e-12
positive regulation of locomotion (GO:0040017)	561	18	4.9	+	3.67	3.07e-06	0.000786		cell death (GO:0008219)	1083	34	12.15	+	2.8	8.64e-08	2.32e-05		regulation of biological process (GO:0050789)	11904	142	103.46	+	1.37	1.73e-09	4.56e-07		respiratory tube development (GO:0030323)	175	9	0.88	+	10.28	3.49e-07	9.38e-05		Cartilage development (GO:0051216)	156	10	7.51	1.56e-06	0.000429				Response to endogenous stimulus (GO:0009719)	1458	54	2.89	2.65e-12
positive regulation of cellular component movement (GO:0051272)	559	18	4.89	+	3.68	2.93e-06	0.000787		localization (GO:0051179)	5832	104	65.41	+	1.59	9.37e-08	2.48e-05		locomotion (GO:0040011)	1340	36	11.65	+	3.09	1.72e-09	4.61e-07		regulation of cell communication (GO:0010646)	3432	39	17.16	+	2.27	3.61e-07	9.54e-05		Regulation of signal transduction (GO:0009966)	3147	52	1.94	1.66e-06	0.000434				Cell communication (GO:0007154)	5413	123	1.77	2.71e-12
response to stress (GO:0006950)	3648	58	31.88	+	1.82	3.01e-06	0.000795		cell communication (GO:0007154)	5595	101	62.76	+	1.61	9.62e-08	2.5e-05		cell motility (GO:0048870)	1106	32	9.61	+	3.33	2.88e-09	7.37e-07		regulation of signaling (GO:0023051)	3468	39	17.34	+	2.25	4.12e-07	0.000107		Response to stimulus (GO:0050896)	8523	105	1.44	1.64e-06	0.000436				Response to external stimulus (GO:0009605)	2526	75	2.32	3.06e-12
regulation of signaling (GO:0023051)	3468	56	30.31	+	1.85	3.06e-06	0.000797		leukocyte degranulation (GO:0043299)	504	22	5.65	+	3.89	1.09e-07	2.79e-05		localization of cell (GO:0051674)	1106	32	9.61	+	3.33	2.88e-09	7.49e-07		negative regulation of blood coagulation (GO:0030195)	52	6	0.26	+	23.07	4.3e-07	0.00011		Tube development (GO:0035295)	863	23	3.12	1.79e-06	0.000447				Regulation of cell death (GO:0010941)	1707	59	2.7	3.32e-12
regulation of intracellular signal transduction (GO:1902531)	1779	36	15.55	+	2.32	3.23e-06	0.000813		regulation of developmental process (GO:0050793)	2465	57	27.65	+	2.06	1.23e-07	3.01e-05		cellular response to stimulus (GO:0051716)	6793	98	59.04	+	1.66	3.18e-09	7.87e-07		response to endogenous stimulus (GO:0009719)	1417	23	7.09	+	3.25	4.81e-07	0.000119		Cell communication (GO:0007154)	5413	76	1.64	1.79e-06	0.000453				Regulation of biological quality (GO:0065008)	4085	102	1.95	3.56e-12
cellular cation homeostasis (GO:0030003)	632	19	5.52	+	3.44	4.03e-06	0.000999		regulated exocytosis (GO:0045055)	691	26	7.75	+	3.35	1.23e-07	3.04e-05		wound healing (GO:0042060)	439	20	3.82	+	5.24	3.13e-09	7.87e-07		negative regulation of hemostasis (GO:1900047)	53	6	0.27	+	22.64	4.77e-07	0.00012		Response to molecule of bacterial origin (GO:0002237)	337	14	4.87	1.86e-06	0.000456				Signaling (GO:0023052)	5322	121	1.78	3.84e-12
positive regulation of cell migration (GO:0030335)	523	17	4.57	+	3.72	4.96e-06	0.00121		anatomical structure formation involved in morphogenesis (GO:0048646)	889	30	9.97	+	3.01	1.22e-07	3.08e-05		response to lipopolysaccharide (GO:0032496)	321	17	2.79	+	6.09	6.18e-09	1.51e-06		regulation of response to stimulus (GO:0048583)	4275	44	21.38	+	2.06	5.5e-07	0.000134		Negative regulation of blood vessel morphogenesis (GO:2000181)	122	9	8.64	1.78e-06	0.000457				Response to organic cyclic compound (GO:0014070)	927	41	3.45	9.87e-12
cellular developmental process (GO:0048869)	3593	56	31.4	+	1.78	7.65e-06	0.00184		positive regulation of multicellular organismal process (GO:0051240)	1429	40	16.03	+	2.5	1.51e-07	3.53e-05		regulation of anatomical structure morphogenesis (GO:0022603)	977	29	8.49	+	3.42	1.03e-08	2.47e-06		regulation of multicellular organismal development (GO:2000026)	1331	22	6.66	+	3.3	6.66e-07	0.00016		Regulation of biological process (GO:0050789)	11714	131	1.31	2.07e-06	0.000501				Secretion (GO:0046903)	1122	45	3.13	1.98e-11
cellular response to organic substance (GO:0071310)	2350	42	20.54	+	2.04	9.19e-06	0.00218		negative regulation of cell population proliferation (GO:0008285)	698	26	7.83	+	3.32	1.48e-07	3.56e-05		negative regulation of cell-substrate adhesion (GO:0010812)	63	9	0.55	+	16.44	1.14e-08	2.71e-06		negative regulation of coagulation (GO:0050819)	57	6	0.29	+	21.05	7.08e-07	0.000168		Cellular response to growth factor stimulus (GO:0071363)	502	17	3.97	2.14e-06	0.000502				Regulation of wound healing (GO:0061041)	145	17	9.16	2.71e-11
cellular response to endogenous stimulus (GO:0071495)	1146	26	10.02	+	2.6	9.73e-06	0.00227		myeloid leukocyte mediated immunity (GO:0002444)	514	22	5.77	+	3.82	1.51e-07	3.57e-05		biological regulation (GO:0065007)	12575	145	109.29	+	1.33	1.24e-08	2.88e-06		regulation of developmental process (GO:0050793)	2465	31	12.33	+	2.51	8.31e-07	0.000191		Signal transduction (GO:0007165)	4950	71	1.68	2.13e-06	0.000507				Response to oxygen-containing compound (GO:1901700)	1604	55	2.68	2.89e-11
circulatory system process (GO:0003013)	497	16	4.34	+	3.68	1.07e-05	0.00246		regulation of biological quality (GO:0065008)	4013	79	45.01	+	1.76	1.7e-07	3.91e-05		response to molecule of bacterial origin (GO:0002237)	338	17	2.94	+	5.79	1.28e-08	2.9e-06		cellular developmental process (GO:0048869)	3593	39	17.97	+	2.17	8.26e-07	0.000193		Circulatory system development (GO:0072359)	880	23	3.06	2.46e-06	0.00057				Positive regulation of signal transduction (GO:0009967)	1661	56	2.63	3.44e-11
Unclassified (UNCLASSIFIED)	2738	6	23.93	-	0.25	1.14e-05	0.00254		tube development (GO:0035295)	860	29	9.65	+	3.01	2.06e-07	4.66e-05		signaling (GO:0023052)	5504	84	47.84	+	1.76	1.26e-08	2.91e-06		angiogenesis (GO:0001525)	323	11	1.62	+	6.81	8.72e-07	0.000198		Response to biotic stimulus (GO:0009607)	1452	31	2.5	2.52e-06	0.000574				Signal transduction (GO:0007165)	4950	113	1.78	3.88e-11
metal ion homeostasis (GO:0055065)	620	18	5.42	+	3.32	1.16e-05	0.00256		cell junction assembly (GO:0034329)	279	16	3.13	+	5.11	2.11e-07	4.7e-05		response to cytokine (GO:0034097)	1125	31	9.78	+	3.17	1.6e-08	3.52e-06		respiratory system development (GO:0060541)	198	9	0.99	+	9.09	9.37e-07	0.000209		Response to nitrogen compound (GO:1901698)	1096	26	2.78	2.92e-06	0.000658				Response to hormone (GO:0009725)	850	38	3.49	4.61e-11
biological_process (GO:0008150)	17857	174	156.07	+	1.11	1.14e-05	0.00257		regulation of signaling (GO:0023051)	3468	71	38.9	+	1.83	2.22e-07	4.89e-05		response to organonitrogen compound (GO:0010243)	997	29	8.67	+	3.35	1.58e-08	3.54e-06		regulation of apoptotic process (GO:0042981)	1495	23	7.48	+	3.08	1.2e-06	0.000265		Cell motility (GO:0048870)	1100	26	2.77	3.12e-06	0.000682				Negative regulation of cell population proliferation (GO:0008285)	701	34	3.79	6.93e-11
regulation of localization (GO:0032879)	2771	46	24.22	+	1.9	1.5e-05	0.00321		cell activation (GO:0001775)	1075	33	12.06	+	2.74	2.26e-07	4.9e-05		cell-substrate adhesion (GO:0031589)	186	13	1.62	+	8.04	1.91e-08	4.1e-06		skeletal system development (GO:0001501)	488	13	2.44	+	5.33	1.23e-06	0.000268		Localization of cell (GO:0051674)	1100	26	2.77	3.12e-06	0.000692				Cellular response to cytokine stimulus (GO:0071345)	1034	42	3.17	7.03e-11
negative regulation of biological process (GO:0048519)	5581	76	48.78	+	1.56	1.49e-05	0.00323		cellular response to chemical stimulus (GO:0070887)	2924	63	32.8	+	1.92	2.33e-07	5.01e-05		cellular response to oxygen-containing compound (GO:1901701)	1069	30	9.29	+	3.23	1.89e-08	4.12e-06		connective tissue development (GO:0061448)	209	9	1.05	+	8.61	1.44e-06	0.000309		Regulation of cellular process (GO:0050794)	11160	126	1.32	3.42e-06	0.000738				Response to cytokine (GO:0034097)	1124	44	3.06	7.3e-11
animal organ morphogenesis (GO:0009887)	971	23	8.49	+	2.71	1.73e-05	0.00365		extracellular matrix organization (GO:0030198)	363	18	4.07	+	4.42	2.82e-07	5.97e-05		cartilage development (GO:0051216)	156	12	1.36	+	8.85	2.54e-08	5.31e-06		regulation of programmed cell death (GO:0043067)	1528	23	7.64	+	3.01	1.74e-06	0.000367		Negative regulation of vasculature development (GO:1901343)	134	9	7.87	3.67e-06	0.000782				Secretion by cell (GO:0032940)	1005	41	3.19	1.08e-10
cellular response to hormone stimulus (GO:0032870)	530	16	4.63	+	3.45	2.3e-05	0.0048		extracellular structure organization (GO:0043062)	364	18	4.08	+	4.41	2.93e-07	6.13e-05		cell communication (GO:0007154)	5595	84	48.63	+	1.73	2.54e-08	5.36e-06		homeostatic process (GO:0042592)	1668	24	8.34	+	2.88	2.15e-06	0.000449		Signaling (GO:0023052)	5322	74	1.63	3.79e-06	0.000796				Export from cell (GO:0140352)	1053	42	3.11	1.21e-10
cell differentiation (GO:0030154)	3537	54	30.91	+	1.75	2.54e-05	0.00523		response to organic substance (GO:0010033)	3006	64	33.72	+	1.9	3.03e-07	6.23e-05		tube morphogenesis (GO:0035239)	664	23	5.77	+	3.99	2.79e-08	5.74e-06		response to organic cyclic compound (GO:0014070)	889	17	4.45	+	3.82	2.28e-06	0.000469		Cellular response to endogenous stimulus (GO:0071495)	1187	27	2.66	3.97e-06	0.000822				Cell migration (GO:0016477)	972	40	3.21	1.46e-10
lung development (GO:0030324)	171	9	1.49	+	6.02	2.82e-05	0.00574		response to external stimulus (GO:0009605)	2532	57	28.4	+	2.01	3.1e-07	6.31e-05		animal organ morphogenesis (GO:0009887)	971	28	8.44	+	3.32	3.46e-08	6.95e-06		cell differentiation (GO:0030154)	3537	38	17.69	+	2.15	2.31e-06	0.000469		Vasculature development (GO:0001944)	528	17	3.77	4.11e-06	0.000841				Negative regulation of signal transduction (GO:0009968)	1290	47	2.85	1.53e-10
regulation of epithelial cell differentiation involved in kidney development (GO:2000696)	17	4	0.15	+	26.92	2.91e-05	0.00576		leukocyte activation (GO:0045321)	931	30	10.44	+	2.87	3.18e-07	6.38e-05		regulation of response to wounding (GO:1903034)	161	12	1.4	+	8.58	3.53e-08	7e-06		regulation of blood coagulation (GO:0030193)	71	6	0.36	+	16.9	2.34e-06	0.000469		Response to growth factor (GO:0070848)	531	17	3.75	4.42e-06	0.000893				Positive regulation of response to stimulus (GO:0048584)	2414	69	2.23	1.66e-10
enzyme linked receptor protein signaling pathway (GO:0007167)	730	19	6.38	+	2.98	2.87e-05	0.00577		negative regulation of biological process (GO:0048519)	5581	99	62.6	+	1.58	3.31e-07	6.57e-05		collagen fibril organization (GO:0030199)	50	8	0.43	+	18.41	3.45e-08	7.01e-06		regulation of hemostasis (GO:1900046)	72	6	0.36	+	16.66	2.52e-06	0.0005		Tissue development (GO:0009888)	1774	35	2.31	4.79e-06	0.000957				Positive regulation of multicellular organismal process (GO:0051240)	1788	57	2.49	2.02e-10
response to metal ion (GO:0010038)	371	13	3.24	+	4.01	3.19e-05	0.00625		programmed cell death (GO:0012501)	1046	32	11.73	+	2.73	3.78e-07	7.41e-05		regulation of localization (GO:0032879)	2771	52	24.08	+	2.16	6.27e-08	1.23e-05		regulation of response to stress (GO:0080134)	1566	23	7.83	+	2.94	2.62e-06	0.000513		Biological regulation (GO:0065007)	12390	135	1.28	5.19e-06	0.000998				Positive regulation of developmental process (GO:0051094)	1402	49	2.73	2.31e-10
respiratory tube development (GO:0030323)	175	9	1.53	+	5.88	3.36e-05	0.00649		exocytosis (GO:0006887)	787	27	8.83	+	3.06	4.05e-07	7.84e-05		regulation of biological quality (GO:0065008)	4013	66	34.88	+	1.89	7e-08	1.35e-05		epithelium development (GO:0060429)	1121	19	5.61	+	3.39	3.07e-06	0.000594		Positive regulation of multicellular organismal process (GO:0051240)	1788	35	2.29	5.13e-06	0.001				Extracellular matrix disassembly (GO:0022617)	66	12	14.2	2.7e-10
positive regulation of cellular process (GO:0048522)	5685	76	49.69	+	1.53	3.54e-05	0.00677		tissue morphogenesis (GO:0048729)	550	22	6.17	+	3.57	4.56e-07	8.71e-05		regulation of MAPK cascade (GO:0043408)	705	23	6.13	+	3.75	7.98e-08	1.53e-05		negative regulation of wound healing (GO:0061045)	75	6	0.38	+	16	3.15e-06	0.000601		Cardiovascular system development (GO:0072358)	537	17	3.71	5.1e-06	0.00101				Regulation of apoptotic process (GO:0042981)	1557	52	2.61	2.8e-10
cellular metal ion homeostasis (GO:0006875)	552	16	4.82	+	3.32	3.7e-05	0.00698		cell surface receptor signaling pathway (GO:0007166)	2510	56	28.15	+	1.99	5.05e-07	9.42e-05		response to nitrogen compound (GO:1901698)	1083	29	9.41	+	3.08	9.01e-08	1.7e-05		reproductive process (GO:0022414)	1466	22	7.33	+	3	3.21e-06	0.000607		Enzyme linked receptor protein signaling pathway (GO:0007167)	733	20	3.2	6.36e-06	0.00121				Regulation of response to wounding (GO:1903034)	175	17	7.59	3.99e-10
negative regulation of multicellular organismal process (GO:0051241)	1022	23	8.93	+	2.57	3.77e-05	0.00704		regulation of catalytic activity (GO:0050790)	2384	54	26.74	+	2.02	5.03e-07	9.5e-05		positive regulation of cell communication (GO:0010647)	1723	38	14.98	+	2.54	1.01e-07	1.88e-05		reproduction (GO:0000003)	1469	22	7.35	+	2.99	3.32e-06	0.000613		Reproductive structure development (GO:0048608)	432	15	4.07	6.53e-06	0.00123				Regulation of programmed cell death (GO:0043067)	1579	52	2.57	4.54e-10
positive regulation of branching involved in ureteric bud morphogenesis (GO:0090190)	19	4	0.17	+	24.09	4.24e-05	0.00783		keratinization (GO:0031424)	226	14	2.53	+	5.52	5.16e-07	9.52e-05		positive regulation of signaling (GO:0023056)	1730	38	15.04	+	2.53	1.12e-07	2.06e-05		chemical homeostasis (GO:0048878)	1127	19	5.64	+	3.37	3.31e-06	0.000619		Reproductive system development (GO:0061458)	436	15	4.03	7.26e-06	0.00135				Negative regulation of cell death (GO:0060548)	1016	40	3.07	5.13e-10
ear development (GO:0043583)	227	10	1.98	+	5.04	4.34e-05	0.00791		regulation of response to stress (GO:0080134)	1566	41	17.56	+	2.33	5.83e-07	0.000106		cell surface receptor signaling pathway (GO:0007166)	2510	48	21.82	+	2.2	1.25e-07	2.27e-05		export from cell (GO:0140352)	1024	18	5.12	+	3.51	3.54e-06	0.000645		Response to other organism (GO:0051707)	1418	30	2.48	7.37e-06	0.00135				Regulation of hormone levels (GO:0010817)	528	28	4.14	5.71e-10
cellular response to metal ion (GO:0071248)	193	9	1.69	+	5.34	6.93e-05	0.0125		positive regulation of developmental process (GO:0051094)	1277	36	14.32	+	2.51	7.13e-07	0.000129		movement of cell or subcellular component (GO:0006928)	1592	36	13.84	+	2.6	1.3e-07	2.34e-05		regulation of coagulation (GO:0050818)	77	6	0.39	+	15.58	3.63e-06	0.000654		Response to external biotic stimulus (GO:0043207)	1420	30	2.47	7.44e-06	0.00135				Response to wounding (GO:0009611)	533	28	4.1	6.99e-10
regulation of branching involved in ureteric bud morphogenesis (GO:0090189)	22	4	0.19	+	20.8	7.02e-05	0.0125		regulation of cell-cell adhesion (GO:0022407)	433	19	4.86	+	3.91	7.73e-07	0.000138		ossification (GO:0001503)	265	14	2.3	+	6.08	1.47e-07	2.61e-05		tissue morphogenesis (GO:0048729)	550	13	2.75	+	4.73	4.44e-06	0.000791		Cellular response to transforming growth factor beta stimulus (GO:0071560)	151	9	6.98	9.18e-06	0.00163				Anatomical structure formation involved in morphogenesis (GO:0048646)	897	37	3.22	7.33e-10
positive regulation of epithelial cell differentiation involved in kidney development (GO:2000698)	7	3	0.06	+	49.04	7.34e-05	0.0129		regulation of cell communication (GO:0010646)	3432	69	38.49	+	1.79	8e-07	0.000141		positive regulation of response to stimulus (GO:0048584)	2295	45	19.95	+	2.26	1.6e-07	2.83e-05		regulation of signal transduction (GO:0009966)	3068	34	15.34	+	2.22	4.58e-06	0.000808		Positive regulation of response to stimulus (GO:0048584)	2414	42	2.04	9.28e-06	0.00163				Cytokine-mediated signaling pathway (GO:0019221)	696	32	3.59	9.39e-10
blood circulation (GO:0008015)	405	13	3.54	+	3.67	7.58e-05	0.0132		signal transduction (GO:0007165)	5152	92	57.79	+	1.59	8.59e-07	0.00015		regulation of protein phosphorylation (GO:0001932)	1463	34	12.72	+	2.67	1.66e-07	2.9e-05		programmed cell death (GO:0012501)	1046	18	5.23	+	3.44	4.73e-06	0.000824		Negative regulation of cell development (GO:0010721)	336	13	4.53	9.15e-06	0.00164				Regulation of protein metabolic process (GO:0051246)	2851	75	2.05	9.95e-10
tissue development (GO:0009888)	1762	32	15.4	+	2.08	8.06e-05	0.0139		leukocyte activation involved in immune response (GO:0002366)	622	23	6.98	+	3.3	9.15e-07	0.000158		blood vessel morphogenesis (GO:0048514)	415	17	3.61	+	4.71	2.18e-07	3.71e-05		cell adhesion (GO:0007155)	945	17	4.73	+	3.6	5.07e-06	0.000875		Blood vessel development (GO:0001568)	505	16	3.71	9.7e-06	0.00168				Regulation of cellular protein metabolic process (GO:0032268)	2672	72	2.1	1.05e-09
respiratory system development (GO:0060541)	198	9	1.73	+	5.2	8.36e-05	0.0143		cell activation involved in immune response (GO:0002263)	626	23	7.02	+	3.28	1.02e-06	0.000174		signal transduction (GO:0007165)	5152	77	44.78	+	1.72	2.16e-07	3.73e-05		biological adhesion (GO:0022610)	951	17	4.76	+	3.57	5.51e-06	0.000939		Cellular response to cytokine stimulus (GO:0071345)	1034	24	2.72	1.05e-05	0.00179				Collagen catabolic process (GO:0030574)	43	10	18.16	1.07e-09
negative regulation of growth (GO:0045926)	250	10	2.18	+	4.58	9.4e-05	0.0157		positive regulation of cell population proliferation (GO:0008284)	941	29	10.55	+	2.75	1.22e-06	0.000206		positive regulation of signal transduction (GO:0009967)	1561	35	13.57	+	2.58	2.45e-07	4.14e-05		fibrinolysis (GO:0042730)	20	4	0.1	+	39.99	5.69e-06	0.000961		Cytokine-mediated signaling pathway (GO:0019221)	696	19	3.2	1.09e-05	0.00186				Cellular process (GO:0009987)	15430	238	1.2	1.38e-09
intracellular signal transduction (GO:0035556)	1680	31	14.68	+	2.11	9.33e-05	0.0158		regulation of protein phosphorylation (GO:0001932)	1463	38	16.41	+	2.32	1.99e-06	0.000332		cellular response to endogenous stimulus (GO:0071495)	1146	29	9.96	+	2.91	2.87e-07	4.79e-05		regulation of wound healing (GO:0061041)	131	7	0.66	+	10.68	5.85e-06	0.000976		Neurogenesis (GO:0022008)	1686	33	2.29	1.11e-05	0.00186				Positive regulation of vasculature development (GO:1904018)	191	17	6.95	1.38e-09
circulatory system development (GO:0072359)	871	20	7.61	+	2.63	9.61e-05	0.0159		regulation of cell growth (GO:0001558)	419	18	4.7	+	3.83	2.03e-06	0.000336		aging (GO:0007568)	283	14	2.46	+	5.69	3.14e-07	5.08e-05		signal transduction (GO:0007165)	5152	47	25.77	+	1.82	6.1e-06	0.00101		Regulation of epithelial cell proliferation (GO:0050678)	344	13	4.43	1.17e-05	0.00192				Regulation of vasculature development (GO:1901342)	340	22	5.05	1.45e-09
metanephric nephron tubule morphogenesis (GO:0072282)	8	3	0.07	+	42.91	0.0001	0.0162		positive regulation of signaling (GO:0023056)	1730	42	19.4	+	2.16	2.31e-06	0.000378		regulation of angiogenesis (GO:0045765)	283	14	2.46	+	5.69	3.14e-07	5.13e-05		cell migration (GO:0016477)	973	17	4.87	+	3.49	7.4e-06	0.00121		Regulation of ossification (GO:0030278)	198	10	5.92	1.16e-05	0.00193				Cell motility (GO:0048870)	1100	41	2.91	1.44e-09
regulation of apoptotic signaling pathway (GO:2001233)	359	12	3.14	+	3.82	9.95e-05	0.0163		leukocyte mediated immunity (GO:0002443)	762	25	8.55	+	2.93	2.43e-06	0.000394		cell-matrix adhesion (GO:0007160)	127	10	1.1	+	9.06	3.13e-07	5.17e-05		cell death (GO:0008219)	1083	18	5.42	+	3.32	7.57e-06	0.00123		Response to amino acid (GO:0043200)	118	8	7.94	1.21e-05	0.00197				Locomotion (GO:0040011)	1337	46	2.69	1.47e-09
reproductive process (GO:0022414)	1466	28	12.81	+	2.19	0.00011	0.0176		tube morphogenesis (GO:0035239)	664	23	7.45	+	3.09	2.65e-06	0.000425		regulation of vasculature development (GO:1901342)	286	14	2.49	+	5.63	3.54e-07	5.68e-05		secretion by cell (GO:0032940)	976	17	4.88	+	3.48	7.7e-06	0.00123		Positive regulation of lipid biosynthetic process (GO:0046889)	84	7	9.76	1.23e-05	0.00198				Localization of cell (GO:0051674)	1100	41	2.91	1.44e-09
reproduction (GO:0000003)	1469	28	12.84	+	2.18	0.000112	0.0178		regulation of biological process (GO:0050789)	11904	168	133.52	+	1.26	3.28e-06	0.000516		nervous system development (GO:0007399)	2202	43	19.14	+	2.25	3.71e-07	5.88e-05		regulation of body fluid levels (GO:0050878)	492	12	2.46	+	4.88	7.82e-06	0.00124		Sensory organ development (GO:0007423)	576	17	3.46	1.24e-05	0.00198				Multi-multicellular organism process (GO:0044706)	220	18	6.39	1.56e-09
divalent inorganic cation homeostasis (GO:0072507)	483	14	4.22	+	3.32	0.000115	0.018		negative regulation of ERK1 and ERK2 cascade (GO:0070373)	73	8	0.82	+	9.77	3.25e-06	0.000516		cellular response to amino acid stimulus (GO:0071230)	71	8	0.62	+	12.96	4.02e-07	6.32e-05		negative regulation of response to wounding (GO:1903035)	90	6	0.45	+	13.33	8.46e-06	0.0013		Negative regulation of angiogenesis (GO:0016525)	119	8	7.87	1.28e-05	0.00203				Epithelium development (GO:0060429)	1121	41	2.86	2.44e-09
negative regulation of developmental process (GO:0051093)	887	20	7.75	+	2.58	0.000122	0.019		positive regulation of cellular protein metabolic process (GO:0032270)	1625	40	18.23	+	2.19	3.58e-06	0.000556		regulation of wound healing (GO:0061041)	131	10	1.14	+	8.78	4.09e-07	6.36e-05		regulation of response to external stimulus (GO:0032101)	1203	19	6.02	+	3.16	8.35e-06	0.00131		Response to transforming growth factor beta (GO:0071559)	158	9	6.67	1.3e-05	0.00203				Regulation of protein phosphorylation (GO:0001932)	1461	48	2.57	2.61e-09
tissue morphogenesis (GO:0048729)	550	15	4.81	+	3.12	0.000126	0.0194		regulation of epithelial cell migration (GO:0010632)	232	13	2.6	+	5	3.78e-06	0.000583		cellular response to cytokine stimulus (GO:0071345)	1036	27	9	+	3	4.46e-07	6.87e-05		secretion (GO:0046903)	1092	18	5.46	+	3.3	8.46e-06	0.00132		Movement of cell or subcellular component (GO:0006928)	1584	31	2.29	1.47e-05	0.00227				Biological adhesion (GO:0022610)	945	37	3.06	2.85e-09
reproductive structure development (GO:0048608)	428	13	3.74	+	3.48	0.000129	0.0197		positive regulation of molecular function (GO:0044093)	1829	43	20.51	+	2.1	4.11e-06	0.000627		regulation of protein metabolic process (GO:0051246)	2798	50	24.32	+	2.06	5.13e-07	7.82e-05		signaling (GO:0023052)	5504	49	27.53	+	1.78	9.23e-06	0.00141		Regulation of endothelial cell migration (GO:0010594)	164	9	6.43	1.72e-05	0.00256				Regulation of cell-cell adhesion (GO:0022407)	429	24	4.37	3.88e-09
pattern specification involved in kidney development (GO:0061004)	9	3	0.08	+	38.14	0.000133	0.0199		negative regulation of locomotion (GO:0040013)	318	15	3.57	+	4.21	5.08e-06	0.000768		response to drug (GO:0042493)	392	16	3.41	+	4.7	5.27e-07	7.96e-05		response to nutrient levels (GO:0031667)	501	12	2.51	+	4.79	9.34e-06	0.00141		Unclassified (UNCLASSIFIED)	2939	7	0.28	1.71e-05	0.00257				Wound healing (GO:0042060)	435	24	4.31	5.01e-09
response to stimulus (GO:0050896)	8502	100	74.31	+	1.35	0.000134	0.0199		positive regulation of protein phosphorylation (GO:0001934)	1015	29	11.38	+	2.55	5.16e-06	0.000773		cellular component organization (GO:0016043)	5677	81	49.34	+	1.64	5.38e-07	7.98e-05		negative regulation of response to stimulus (GO:0048585)	1822	24	9.11	+	2.63	9.61e-06	0.00144		Biological_process (GO:0008150)	17912	171	1.12	1.71e-05	0.00259				Tube morphogenesis (GO:0035239)	667	30	3.51	5.32e-09
renal system pattern specification (GO:0072048)	9	3	0.08	+	38.14	0.000133	0.0201		positive regulation of intracellular signal transduction (GO:1902533)	1016	29	11.4	+	2.54	5.26e-06	0.00078		lung development (GO:0030324)	171	11	1.49	+	7.4	5.33e-07	7.98e-05		ion homeostasis (GO:0050801)	786	15	3.93	+	3.82	9.82e-06	0.00146		Cell development (GO:0048468)	1644	32	2.28	1.7e-05	0.00261				Circulatory system development (GO:0072359)	880	35	3.11	5.46e-09
nervous system development (GO:0007399)	2202	37	19.25	+	1.92	0.00014	0.0206		epithelial cell development (GO:0002064)	203	12	2.28	+	5.27	5.37e-06	0.000788		regulation of cell death (GO:0010941)	1665	36	14.47	+	2.49	5.91e-07	8.69e-05		cell motility (GO:0048870)	1106	18	5.53	+	3.25	1e-05	0.00146		Response to nutrient (GO:0007584)	165	9	6.39	1.8e-05	0.00266				Regulation of molecular function (GO:0065009)	3076	77	1.95	6e-09
reproductive system development (GO:0061458)	432	13	3.78	+	3.44	0.000141	0.0206		chemotaxis (GO:0006935)	548	20	6.15	+	3.25	5.86e-06	0.000854		collagen-activated signaling pathway (GO:0038065)	15	5	0.13	+	38.35	6.27e-07	9.13e-05		localization of cell (GO:0051674)	1106	18	5.53	+	3.25	1e-05	0.00147		Positive regulation of signal transduction (GO:0009967)	1661	32	2.26	1.87e-05	0.00274				Regulation of response to external stimulus (GO:0032101)	1208	42	2.72	6.36e-09
positive regulation of mesenchymal cell proliferation (GO:0002053)	27	4	0.24	+	16.95	0.000143	0.0206		regulation of endothelial cell migration (GO:0010594)	170	11	1.91	+	5.77	5.93e-06	0.000855		response to acid chemical (GO:0001101)	138	10	1.2	+	8.34	6.41e-07	9.24e-05		cell communication (GO:0007154)	5595	49	27.98	+	1.75	1.11e-05	0.00159		Response to chemical (GO:0042221)	4423	63	1.67	1.89e-05	0.00274				Regulation of angiogenesis (GO:0045765)	307	20	5.09	7.46e-09
ear morphogenesis (GO:0042471)	125	7	1.09	+	6.41	0.000155	0.0221		taxis (GO:0042330)	550	20	6.17	+	3.24	6.18e-06	0.000883		respiratory tube development (GO:0030323)	175	11	1.52	+	7.23	6.62e-07	9.47e-05		cellular response to stimulus (GO:0051716)	6793	56	33.97	+	1.65	1.2e-05	0.00172		Regulation of cell-substrate adhesion (GO:0010810)	214	10	5.47	2.2e-05	0.00311				Regulation of smooth muscle cell proliferation (GO:0048660)	137	14	7.98	8.01e-09
positive regulation of apoptotic signaling pathway (GO:2001235)	127	7	1.11	+	6.31	0.00017	0.0241		cytokine-mediated signaling pathway (GO:0019221)	701	23	7.86	+	2.93	6.3e-06	0.000892		cellular response to acid chemical (GO:0071229)	79	8	0.69	+	11.65	8.5e-07	0.00012		negative regulation of cell death (GO:0060548)	1025	17	5.13	+	3.32	1.44e-05	0.00204		Negative regulation of locomotion (GO:0040013)	313	12	4.49	2.22e-05	0.00311				Cell adhesion (GO:0007155)	939	36	2.99	8.1e-09
cytokine-mediated signaling pathway (GO:0019221)	701	17	6.13	+	2.77	0.000176	0.0247		regulation of signal transduction (GO:0009966)	3068	61	34.41	+	1.77	6.75e-06	0.000915		positive regulation of multicellular organismal process (GO:0051240)	1429	32	12.42	+	2.58	9.08e-07	0.000126		inorganic ion homeostasis (GO:0098771)	715	14	3.58	+	3.92	1.51e-05	0.00212		Cell adhesion (GO:0007155)	939	22	2.74	2.19e-05	0.00313				Negative regulation of cell adhesion (GO:0007162)	281	19	5.28	1.02e-08
regulation of morphogenesis of a branching structure (GO:0060688)	56	5	0.49	+	10.22	0.000186	0.0256		interspecies interaction between organisms (GO:0044419)	2125	47	23.83	+	1.97	6.61e-06	0.00092		regulation of cellular protein metabolic process (GO:0032268)	2661	48	23.13	+	2.08	9.02e-07	0.000127		metal ion homeostasis (GO:0055065)	620	13	3.1	+	4.19	1.55e-05	0.00216		Tube morphogenesis (GO:0035239)	667	18	3.16	2.19e-05	0.00315				Vasculature development (GO:0001944)	528	26	3.85	1.05e-08
cellular response to inorganic substance (GO:0071241)	221	9	1.93	+	4.66	0.000185	0.0258		positive regulation of cell communication (GO:0010647)	1723	41	19.33	+	2.12	6.73e-06	0.000921		mucopolysaccharide metabolic process (GO:1903510)	110	9	0.96	+	9.41	9.18e-07	0.000127		cellular process (GO:0009987)	15475	95	77.39	+	1.23	1.59e-05	0.00218		Negative regulation of cellular component movement (GO:0051271)	315	12	4.46	2.36e-05	0.00328				Negative regulation of apoptotic process (GO:0043066)	906	35	3.02	1.11e-08
response to cytokine (GO:0034097)	1125	23	9.83	+	2.34	0.000189	0.0259		positive regulation of response to external stimulus (GO:0032103)	505	19	5.66	+	3.35	6.68e-06	0.000922		regulation of phosphorylation (GO:0042325)	1634	35	14.2	+	2.46	9.92e-07	0.000136		multi-multicellular organism process (GO:0044706)	215	8	1.08	+	7.44	1.58e-05	0.00218		Biological adhesion (GO:0022610)	945	22	2.73	2.41e-05	0.00329				Negative regulation of wound healing (GO:0061045)	75	11	11.45	1.14e-08
urogenital system development (GO:0001655)	331	11	2.89	+	3.8	0.000204	0.0277		response to cytokine (GO:0034097)	1125	31	12.62	+	2.46	6.57e-06	0.000923		response to external stimulus (GO:0009605)	2532	46	22.01	+	2.09	1.05e-06	0.000142		apoptotic signaling pathway (GO:0097190)	286	9	1.43	+	6.29	1.67e-05	0.00227		Response to bacterium (GO:0009617)	738	19	3.02	2.41e-05	0.00331				Regulated exocytosis (GO:0045055)	696	30	3.37	1.34e-08
response to oxygen-containing compound (GO:1901700)	1596	29	13.95	+	2.08	0.000208	0.0277		regulation of MAPK cascade (GO:0043408)	705	23	7.91	+	2.91	6.89e-06	0.000926		anatomical structure formation involved in morphogenesis (GO:0048646)	889	24	7.73	+	3.11	1.15e-06	0.000154		response to extracellular stimulus (GO:0009991)	533	12	2.67	+	4.5	1.71e-05	0.00229		Collagen metabolic process (GO:0032963)	63	6	11.16	2.6e-05	0.00352				Cardiovascular system development (GO:0072358)	537	26	3.78	1.45e-08
negative regulation of cell differentiation (GO:0045596)	643	16	5.62	+	2.85	0.000207	0.0279		regulation of anatomical structure morphogenesis (GO:0022603)	977	28	10.96	+	2.56	7.2e-06	0.000961		negative regulation of cell differentiation (GO:0045596)	643	20	5.59	+	3.58	1.22e-06	0.000163		placenta development (GO:0001890)	156	7	0.78	+	8.97	1.74e-05	0.00231		Eye development (GO:0001654)	373	13	4.08	2.65e-05	0.00355				Regulation of response to stress (GO:0080134)	1627	50	2.4	1.51e-08
regulation of protein tyrosine kinase activity (GO:0061097)	92	6	0.8	+	7.46	0.000212	0.028		bicellular tight junction assembly (GO:0070830)	58	7	0.65	+	10.76	7.6e-06	0.000988		response to amino acid (GO:0043200)	117	9	1.02	+	8.85	1.48e-06	0.000196		regulation of transforming growth factor beta activation (GO:1901388)	8	3	0.04	+	74.98	1.92e-05	0.00252		Cellular response to biotic stimulus (GO:0071216)	220	10	5.32	2.76e-05	0.00368				Positive regulation of angiogenesis (GO:0045766)	171	15	6.85	1.57e-08
metanephric tubule morphogenesis (GO:0072173)	11	3	0.1	+	31.2	0.000217	0.0285		regulation of response to external stimulus (GO:0032101)	1203	32	13.49	+	2.37	7.48e-06	0.000989		regulation of cellular component organization (GO:0051128)	2367	44	20.57	+	2.14	1.5e-06	0.000197		positive regulation of developmental process (GO:0051094)	1277	19	6.39	+	2.98	1.91e-05	0.00252		Nucleic acid metabolic process (GO:0090304)	2292	4	0.2	2.81e-05	0.00371				Regulation of phosphorylation (GO:0042325)	1631	50	2.39	1.56e-08
tube development (GO:0035295)	860	19	7.52	+	2.53	0.000234	0.03		cellular response to cytokine stimulus (GO:0071345)	1036	29	11.62	+	2.5	7.55e-06	0.000991		glycosaminoglycan metabolic process (GO:0030203)	153	10	1.33	+	7.52	1.55e-06	0.000202		regulation of smooth muscle cell migration (GO:0014910)	62	5	0.31	+	16.13	2.09e-05	0.00272		Visual system development (GO:0150063)	377	13	4.04	2.94e-05	0.00385				Negative regulation of programmed cell death (GO:0043069)	923	35	2.96	1.74e-08
positive regulation of protein tyrosine kinase activity (GO:0061098)	59	5	0.52	+	9.7	0.000233	0.03		regulation of phosphorylation (GO:0042325)	1634	39	18.33	+	2.13	8.27e-06	0.00106		urogenital system development (GO:0001655)	331	14	2.88	+	4.87	1.87e-06	0.000241		regulation of response to wounding (GO:1903034)	161	7	0.81	+	8.69	2.11e-05	0.00272		Negative regulation of catalytic activity (GO:0043086)	819	20	2.86	3.03e-05	0.00393				Regulation of epithelial cell differentiation (GO:0030856)	150	14	7.29	2.31e-08
reactive oxygen species biosynthetic process (GO:1903409)	31	4	0.27	+	14.76	0.000231	0.0301		positive regulation of signal transduction (GO:0009967)	1561	38	17.51	+	2.17	8.22e-06	0.00106		regulation of body fluid levels (GO:0050878)	492	17	4.28	+	3.98	2.09e-06	0.000265		cellular metal ion homeostasis (GO:0006875)	552	12	2.76	+	4.35	2.39e-05	0.00306		Positive regulation of developmental process (GO:0051094)	1402	28	2.34	3.07e-05	0.00395				Cellular response to oxygen-containing compound (GO:1901701)	1073	38	2.77	2.31e-08
cell morphogenesis (GO:0000902)	721	17	6.3	+	2.7	0.000243	0.0309		immune response (GO:0006955)	1951	44	21.88	+	2.01	8.5e-06	0.00108		respiratory system development (GO:0060541)	198	11	1.72	+	6.39	2.08e-06	0.000266		smooth muscle cell migration (GO:0014909)	9	3	0.05	+	66.65	2.55e-05	0.00323		Response to acid chemical (GO:0001101)	137	8	6.84	3.35e-05	0.00427				Negative regulation of developmental process (GO:0051093)	981	36	2.87	2.38e-08
regulation of catalytic activity (GO:0050790)	2384	38	20.84	+	1.82	0.000252	0.0315		calcium-independent cell-cell adhesion via plasma membrane cell-adhesion molecules (GO:0016338)	21	5	0.24	+	21.23	8.74e-06	0.0011		enzyme linked receptor protein signaling pathway (GO:0007167)	730	21	6.34	+	3.31	2.18e-06	0.000274		locomotion (GO:0040011)	1340	19	6.7	+	2.84	3.67e-05	0.00462		Sensory system development (GO:0048880)	383	13	3.98	3.45e-05	0.00433				Regulation of cellular component organization (GO:0051128)	2432	64	2.06	2.74e-08
positive regulation of intrinsic apoptotic signaling pathway (GO:2001244)	60	5	0.52	+	9.53	0.000251	0.0315		tight junction assembly (GO:0120192)	60	7	0.67	+	10.4	9.32e-06	0.00116		positive regulation of macromolecule metabolic process (GO:0010604)	3566	57	30.99	+	1.84	2.36e-06	0.000295		myeloid leukocyte activation (GO:0002274)	584	12	2.92	+	4.11	4.09e-05	0.00511		Animal organ morphogenesis (GO:0009887)	968	22	2.66	3.44e-05	0.00436				Collagen metabolic process (GO:0032963)	63	10	12.4	2.72e-08
cellular divalent inorganic cation homeostasis (GO:0072503)	460	13	4.02	+	3.23	0.000256	0.0318		positive regulation of phosphorylation (GO:0042327)	1092	30	12.25	+	2.45	9.99e-06	0.00124		cellular response to growth factor stimulus (GO:0071363)	500	17	4.35	+	3.91	2.58e-06	0.00032		odontogenesis (GO:0042476)	121	6	0.61	+	9.91	4.17e-05	0.00516		Integrin-mediated signaling pathway (GO:0007229)	100	7	8.2	3.54e-05	0.00442				Regulation of blood coagulation (GO:0030193)	84	11	10.23	3.28e-08
transmembrane receptor protein tyrosine kinase signaling pathway (GO:0007169)	524	14	4.58	+	3.06	0.00026	0.0319		O-glycan processing (GO:0016266)	61	7	0.68	+	10.23	1.03e-05	0.00127		supramolecular fiber organization (GO:0097435)	501	17	4.35	+	3.9	2.65e-06	0.000326		exocytosis (GO:0006887)	787	14	3.94	+	3.56	4.26e-05	0.00524		Locomotion (GO:0040011)	1337	27	2.37	3.83e-05	0.0047				Positive regulation of intracellular signal transduction (GO:1902533)	1044	37	2.77	3.55e-08
regulation of mesenchymal cell apoptotic process (GO:2001053)	12	3	0.1	+	28.6	0.00027	0.0326		regulation of intracellular signal transduction (GO:1902531)	1779	41	19.95	+	2.05	1.08e-05	0.00132		cellular component organization or biogenesis (GO:0071840)	5896	81	51.24	+	1.58	2.72e-06	0.000332		female pregnancy (GO:0007565)	182	7	0.91	+	7.69	4.48e-05	0.00547		Regulation of cell development (GO:0060284)	975	22	2.64	3.82e-05	0.00473				Negative regulation of response to external stimulus (GO:0032102)	563	26	3.61	3.6e-08
regulation of nephron tubule epithelial cell differentiation (GO:0072182)	12	3	0.1	+	28.6	0.00027	0.0329		positive regulation of protein metabolic process (GO:0051247)	1703	40	19.1	+	2.09	1.09e-05	0.00132		regulation of ERK1 and ERK2 cascade (GO:0070372)	295	13	2.56	+	5.07	2.87e-06	0.000347		platelet-derived growth factor receptor signaling pathway (GO:0048008)	36	4	0.18	+	22.22	4.61e-05	0.00558		Apoptotic process (GO:0006915)	910	21	2.7	4.24e-05	0.00517				Regulation of hemostasis (GO:1900046)	85	11	10.11	3.67e-08
regulation of kidney development (GO:0090183)	33	4	0.29	+	13.87	0.000288	0.0346		regulation of growth (GO:0040008)	675	22	7.57	+	2.91	1.12e-05	0.00134		response to nutrient (GO:0007584)	165	10	1.43	+	6.97	2.94e-06	0.000354		regulated exocytosis (GO:0045055)	691	13	3.46	+	3.76	4.68e-05	0.00563		Cellular response to lipopolysaccharide (GO:0071222)	186	9	5.67	4.41e-05	0.00533				Regulation of cell-substrate adhesion (GO:0010810)	214	16	5.84	4.19e-08
neurogenesis (GO:0022008)	1401	26	12.24	+	2.12	0.000292	0.0348		tight junction organization (GO:0120193)	62	7	0.7	+	10.07	1.13e-05	0.00135		renal system development (GO:0072001)	298	13	2.59	+	5.02	3.19e-06	0.00038		cellular response to hypoxia (GO:0071456)	189	7	0.95	+	7.41	5.64e-05	0.00668		Negative regulation of phosphorylation (GO:0042326)	453	14	3.62	4.62e-05	0.00555				Positive regulation of protein phosphorylation (GO:0001934)	1012	36	2.78	5.08e-08
tube morphogenesis (GO:0035239)	664	16	5.8	+	2.76	0.000294	0.0348		positive regulation of cell adhesion (GO:0045785)	431	17	4.83	+	3.52	1.15e-05	0.00137		aminoglycan metabolic process (GO:0006022)	167	10	1.45	+	6.89	3.26e-06	0.000386		cation homeostasis (GO:0055080)	704	13	3.52	+	3.69	5.64e-05	0.00673		Cellular response to amino acid stimulus (GO:0071230)	71	6	9.9	4.87e-05	0.0058				Regulation of transport (GO:0051049)	1909	54	2.21	5.07e-08
kidney development (GO:0001822)	290	10	2.53	+	3.95	0.000299	0.0352		biological regulation (GO:0065007)	12575	173	141.05	+	1.23	1.24e-05	0.00145		response to hormone (GO:0009725)	816	22	7.09	+	3.1	3.41e-06	0.0004		negative regulation of cell communication (GO:0010648)	1386	19	6.93	+	2.74	5.76e-05	0.00677		Response to hormone (GO:0009725)	850	20	2.76	5.02e-05	0.00594				Negative regulation of transport (GO:0051051)	496	24	3.78	5.43e-08
regulation of fatty acid transport (GO:2000191)	34	4	0.3	+	13.46	0.00032	0.0373		vesicle-mediated transport (GO:0016192)	1964	44	22.03	+	2	1.42e-05	0.00165		sensory organ development (GO:0007423)	572	18	4.97	+	3.62	3.69e-06	0.00043		negative regulation of signaling (GO:0023057)	1389	19	6.95	+	2.74	5.92e-05	0.00691		Negative regulation of endothelial cell proliferation (GO:0001937)	43	5	13.62	5.24e-05	0.00615				Animal organ morphogenesis (GO:0009887)	968	35	2.82	5.42e-08
response to insulin (GO:0032868)	239	9	2.09	+	4.31	0.000324	0.0375		regulation of cytokine production (GO:0001817)	739	23	8.29	+	2.77	1.43e-05	0.00166		tissue remodeling (GO:0048771)	98	8	0.85	+	9.39	3.82e-06	0.000442		inflammatory response (GO:0006954)	516	11	2.58	+	4.26	6.33e-05	0.00734		Response to organic cyclic compound (GO:0014070)	927	21	2.65	5.49e-05	0.0064				Female pregnancy (GO:0007565)	189	15	6.2	5.39e-08
anion transport (GO:0006820)	604	15	5.28	+	2.84	0.000335	0.0385		cell development (GO:0048468)	1654	39	18.55	+	2.1	1.45e-05	0.00167		integrin-mediated signaling pathway (GO:0007229)	99	8	0.86	+	9.3	4.1e-06	0.000471		PERK-mediated unfolded protein response (GO:0036499)	13	3	0.07	+	46.14	6.39e-05	0.00735		Negative regulation of neurogenesis (GO:0050768)	293	11	4.4	5.89e-05	0.00677				Positive regulation of phosphate metabolic process (GO:0045937)	1160	39	2.63	5.64e-08
regulation of cell differentiation (GO:0045595)	1573	28	13.75	+	2.04	0.000348	0.0397		morphogenesis of an epithelium (GO:0002009)	440	17	4.94	+	3.44	1.49e-05	0.0017		regulation of phosphate metabolic process (GO:0019220)	1832	36	15.92	+	2.26	4.23e-06	0.000483		ossification (GO:0001503)	265	8	1.33	+	6.04	6.66e-05	0.00761		Positive regulation of cell migration (GO:0030335)	525	15	3.35	5.86e-05	0.00678				Regulation of anatomical structure morphogenesis (GO:0022603)	1112	38	2.67	5.69e-08
regulation of mesenchymal cell proliferation (GO:0010464)	35	4	0.31	+	13.08	0.000354	0.0401		cellular response to stimulus (GO:0051716)	6793	108	76.19	+	1.42	1.63e-05	0.00185		regulation of phosphorus metabolic process (GO:0051174)	1833	36	15.93	+	2.26	4.27e-06	0.000483		endodermal cell differentiation (GO:0035987)	40	4	0.2	+	20	6.74e-05	0.00763		Regulation of cellular ketone metabolic process (GO:0010565)	194	9	5.43	6.02e-05	0.00687				Positive regulation of phosphorus metabolic process (GO:0010562)	1160	39	2.63	5.64e-08
response to inorganic substance (GO:0010035)	542	14	4.74	+	2.96	0.000362	0.0407		regulation of kinase activity (GO:0043549)	911	26	10.22	+	2.54	1.68e-05	0.00189		platelet activation (GO:0030168)	135	9	1.17	+	7.67	4.49e-06	0.000505		cellular response to decreased oxygen levels (GO:0036294)	198	7	0.99	+	7.07	7.49e-05	0.00836		Cellular response to lipid (GO:0071396)	530	15	3.32	6.5e-05	0.00731				Positive regulation of macromolecule metabolic process (GO:0010604)	3621	83	1.79	5.88e-08
renal system development (GO:0072001)	298	10	2.6	+	3.84	0.000368	0.0409		regulation of protein kinase activity (GO:0045859)	801	24	8.98	+	2.67	1.69e-05	0.00189		glycosaminoglycan biosynthetic process (GO:0006024)	101	8	0.88	+	9.11	4.71e-06	0.000526		regulation of smooth muscle cell proliferation (GO:0048660)	135	6	0.68	+	8.89	7.47e-05	0.0084		Cellular response to molecule of bacterial origin (GO:0071219)	196	9	5.38	6.5e-05	0.00735				Regulation of coagulation (GO:0050818)	90	11	9.54	6.25e-08
central nervous system development (GO:0007417)	1019	21	8.91	+	2.36	0.000367	0.041		apical junction assembly (GO:0043297)	67	7	0.75	+	9.31	1.81e-05	0.002		positive regulation of MAPK cascade (GO:0043410)	526	17	4.57	+	3.72	4.96e-06	0.00055		morphogenesis of an epithelium (GO:0002009)	440	10	2.2	+	4.54	8.3e-05	0.00921		Regulation of phosphorylation (GO:0042325)	1631	30	2.15	6.8e-05	0.00759				Negative regulation of response to wounding (GO:1903035)	90	11	9.54	6.25e-08
positive regulation of morphogenesis of an epithelium (GO:1905332)	36	4	0.31	+	12.71	0.00039	0.0421		establishment of skin barrier (GO:0061436)	25	5	0.28	+	17.83	1.83e-05	0.00201		negative regulation of cellular component organization (GO:0051129)	709	20	6.16	+	3.25	5.13e-06	0.000565		cellular cation homeostasis (GO:0030003)	632	12	3.16	+	3.8	8.58e-05	0.00946		Central nervous system development (GO:0007417)	1019	22	2.53	7.23e-05	0.00802				Cell activation (GO:0001775)	1071	37	2.7	6.66e-08
biological regulation (GO:0065007)	12575	133	109.91	+	1.21	0.000385	0.0424		negative regulation of cell migration (GO:0030336)	271	13	3.04	+	4.28	1.85e-05	0.00202		response to growth factor (GO:0070848)	528	17	4.59	+	3.7	5.2e-06	0.000569		regulation of apoptotic signaling pathway (GO:2001233)	359	9	1.8	+	5.01	9.29e-05	0.0102		Negative regulation of metabolic process (GO:0009892)	3098	47	1.78	7.52e-05	0.00822				Blood vessel development (GO:0001568)	505	24	3.71	7.48e-08
animal organ formation (GO:0048645)	36	4	0.31	+	12.71	0.00039	0.0424		cell differentiation involved in embryonic placenta development (GO:0060706)	26	5	0.29	+	17.15	2.16e-05	0.00235		regulation of stem cell proliferation (GO:0072091)	72	7	0.63	+	11.19	5.39e-06	0.000582		cell activation (GO:0001775)	1075	16	5.38	+	2.98	9.44e-05	0.0103		Cellular response to growth hormone stimulus (GO:0071378)	23	4	20.37	7.48e-05	0.00824				Tissue morphogenesis (GO:0048729)	550	25	3.55	8.94e-08
regulation of hormone metabolic process (GO:0032350)	36	4	0.31	+	12.71	0.00039	0.0427		regulation of peptidase activity (GO:0052547)	454	17	5.09	+	3.34	2.19e-05	0.00237		regulation of membrane protein ectodomain proteolysis (GO:0051043)	25	5	0.22	+	23.01	5.37e-06	0.000584		cell surface receptor signaling pathway (GO:0007166)	2510	27	12.55	+	2.15	0.000107	0.0114		Positive regulation of lipid metabolic process (GO:0045834)	156	8	6.01	8e-05	0.00846				Movement of cell or subcellular component (GO:0006928)	1584	47	2.32	9.21e-08
regulation of apoptotic process involved in metanephric collecting duct development (GO:1900214)	2	2	0.02	+	> 100	0.000443	0.0434		immune effector process (GO:0002252)	1095	29	12.28	+	2.36	2.32e-05	0.00249		regulation of intracellular signal transduction (GO:1902531)	1779	35	15.46	+	2.26	6.01e-06	0.000645		cellular ion homeostasis (GO:0006873)	647	12	3.24	+	3.71	0.000107	0.0114		Regulation of cytokine production (GO:0001817)	739	18	2.85	7.97e-05	0.00848				Positive regulation of phosphorylation (GO:0042327)	1089	37	2.65	1e-07
negative regulation of apoptotic process involved in metanephric collecting duct development (GO:1900215)	2	2	0.02	+	> 100	0.000443	0.0436		regulation of transferase activity (GO:0051338)	1028	28	11.53	+	2.43	2.35e-05	0.0025		negative regulation of angiogenesis (GO:0016525)	105	8	0.91	+	8.77	6.16e-06	0.000655		negative regulation of cell adhesion (GO:0007162)	284	8	1.42	+	5.63	0.000106	0.0115		Cellular response to acid chemical (GO:0071229)	78	6	9.01	7.95e-05	0.00852				Positive regulation of metabolic process (GO:0009893)	3920	87	1.73	9.9e-08
regulation of apoptotic process involved in metanephric nephron tubule development (GO:1900217)	2	2	0.02	+	> 100	0.000443	0.0439		positive regulation of phosphate metabolic process (GO:0045937)	1163	30	13.04	+	2.3	2.5e-05	0.00263		positive regulation of nitrogen compound metabolic process (GO:0051173)	3202	52	27.83	+	1.87	6.22e-06	0.000658		integrated stress response signaling (GO:0140467)	16	3	0.08	+	37.49	0.000109	0.0115		Cellular response to organonitrogen compound (GO:0071417)	604	16	3.1	7.88e-05	0.00856				Lung development (GO:0030324)	171	14	6.39	1.06e-07
negative regulation of apoptotic process involved in metanephric nephron tubule development (GO:1900218)	2	2	0.02	+	> 100	0.000443	0.0442		regulation of cellular process (GO:0050794)	11345	159	127.25	+	1.25	2.53e-05	0.00264		regulation of protein modification process (GO:0031399)	1879	36	16.33	+	2.2	6.51e-06	0.000684		response to steroid hormone (GO:0048545)	285	8	1.43	+	5.61	0.000109	0.0115		Regulation of apoptotic process (GO:0042981)	1557	29	2.18	7.94e-05	0.00856				Positive regulation of cell differentiation (GO:0045597)	1005	35	2.72	1.3e-07
kidney field specification (GO:0072004)	2	2	0.02	+	> 100	0.000443	0.0445		positive regulation of phosphorus metabolic process (GO:0010562)	1163	30	13.04	+	2.3	2.5e-05	0.00265		negative regulation of blood vessel morphogenesis (GO:2000181)	106	8	0.92	+	8.68	6.57e-06	0.000686		cellular response to oxygen levels (GO:0071453)	215	7	1.08	+	6.51	0.000123	0.0126		Negative regulation of secretion by cell (GO:1903531)	203	9	5.19	8.41e-05	0.00883				Respiratory tube development (GO:0030323)	175	14	6.25	1.38e-07
cellular response to cytokine stimulus (GO:0071345)	1036	21	9.05	+	2.32	0.00042	0.0447		cellular response to organic substance (GO:0071310)	2350	49	26.36	+	1.86	2.57e-05	0.00266		female pregnancy (GO:0007565)	182	10	1.58	+	6.32	6.72e-06	0.000696		developmental process involved in reproduction (GO:0003006)	983	15	4.92	+	3.05	0.000122	0.0127		Regulation of cell death (GO:0010941)	1707	31	2.13	8.69e-05	0.00907				Regulation of intracellular signal transduction (GO:1902531)	1820	51	2.19	1.71e-07
regulation of metanephric DCT cell differentiation (GO:2000592)	2	2	0.02	+	> 100	0.000443	0.0447		positive regulation of cell growth (GO:0030307)	167	10	1.87	+	5.34	2.96e-05	0.00303		response to peptide (GO:1901652)	482	16	4.19	+	3.82	6.9e-06	0.00071		negative regulation of response to external stimulus (GO:0032102)	557	11	2.79	+	3.95	0.000123	0.0127		Regulation of nervous system development (GO:0051960)	959	21	2.57	8.79e-05	0.00911				Cellular response to lipid (GO:0071396)	530	24	3.54	1.75e-07
embryonic organ morphogenesis (GO:0048562)	303	10	2.65	+	3.78	0.000418	0.0448		regulation of water loss via skin (GO:0033561)	28	5	0.31	+	15.92	2.96e-05	0.00305		eye development (GO:0001654)	373	14	3.24	+	4.32	7.02e-06	0.000714		response to oxygen-containing compound (GO:1901700)	1596	20	7.98	+	2.51	0.000122	0.0127		Regulation of fever generation (GO:0031620)	8	3	43.93	9.36e-05	0.00964				Regulation of phosphate metabolic process (GO:0019220)	1828	51	2.18	1.84e-07
positive regulation of metanephric DCT cell differentiation (GO:2000594)	2	2	0.02	+	> 100	0.000443	0.045		positive regulation of immune system process (GO:0002684)	1051	28	11.79	+	2.38	3.06e-05	0.00307		negative regulation of vasculature development (GO:1901343)	107	8	0.93	+	8.6	7.01e-06	0.000718		intrinsic apoptotic signaling pathway (GO:0097193)	151	6	0.76	+	7.95	0.000135	0.0137		Regulation of phosphate metabolic process (GO:0019220)	1828	32	2.05	9.58e-05	0.00974				Regulation of phosphorus metabolic process (GO:0051174)	1829	51	2.18	1.85e-07
regulation of mesenchymal cell apoptotic process involved in metanephric nephron morphogenesis (GO:0072304)	2	2	0.02	+	> 100	0.000443	0.0453		regulation of cellular protein metabolic process (GO:0032268)	2661	53	29.85	+	1.78	3.04e-05	0.00307		regulation of cytosolic calcium ion concentration (GO:0051480)	322	13	2.8	+	4.65	7.14e-06	0.000721		endoderm formation (GO:0001706)	50	4	0.25	+	16	0.000151	0.0153		Positive regulation of cell motility (GO:2000147)	550	15	3.19	9.71e-05	0.00975				Cell-cell signaling (GO:0007267)	1167	38	2.54	1.88e-07
cell development (GO:0048468)	1654	29	14.46	+	2.01	0.000468	0.0456		cellular process (GO:0009987)	15475	200	173.57	+	1.15	3.02e-05	0.00307		positive regulation of metabolic process (GO:0009893)	3852	59	33.48	+	1.76	7.39e-06	0.000738		muscle structure development (GO:0061061)	477	10	2.39	+	4.19	0.000158	0.0159		Regulation of phosphorus metabolic process (GO:0051174)	1829	32	2.05	9.66e-05	0.00976				Neutrophil mediated immunity (GO:0002446)	493	23	3.64	1.94e-07
regulation of morphogenesis of an epithelium (GO:1905330)	68	5	0.59	+	8.41	0.000431	0.0456		negative regulation of cell motility (GO:2000146)	286	13	3.21	+	4.05	3.16e-05	0.00312		angiogenesis (GO:0001525)	323	13	2.81	+	4.63	7.37e-06	0.00074		nucleic acid metabolic process (GO:0090304)	2219	1	11.1	-	0.09	0.000178	0.0178		Regulation of programmed cell death (GO:0043067)	1579	29	2.15	9.55e-05	0.00977				Positive regulation of molecular function (GO:0044093)	1835	51	2.17	1.97e-07
negative regulation of mesenchymal cell apoptotic process involved in metanephric nephron morphogenesis (GO:0072305)	2	2	0.02	+	> 100	0.000443	0.0456		response to organic cyclic compound (GO:0014070)	889	25	9.97	+	2.51	3.13e-05	0.00312		aminoglycan biosynthetic process (GO:0006023)	108	8	0.94	+	8.52	7.48e-06	0.000741		negative regulation of apoptotic process (GO:0043066)	912	14	4.56	+	3.07	0.000197	0.0196		Generation of neurons (GO:0048699)	1582	29	2.15	9.81e-05	0.00978				Exocytosis (GO:0006887)	792	30	2.96	2.04e-07
inner ear morphogenesis (GO:0042472)	106	6	0.93	+	6.48	0.000436	0.0458		homeostatic process (GO:0042592)	1668	38	18.71	+	2.03	3.16e-05	0.00313		regulation of apoptotic process (GO:0042981)	1495	31	12.99	+	2.39	7.61e-06	0.00075		apoptotic process (GO:0006915)	913	14	4.57	+	3.07	0.000199	0.0196		Regulation of cytokine secretion (GO:0050707)	210	9	5.02	0.000108	0.0106				Regulation of epithelial cell proliferation (GO:0050678)	344	19	4.31	2.08e-07
metanephric nephron tubule development (GO:0072234)	15	3	0.13	+	22.88	0.000474	0.0459		digestive system process (GO:0022600)	74	7	0.83	+	8.43	3.27e-05	0.0032		neurogenesis (GO:0022008)	1401	30	12.18	+	2.46	7.74e-06	0.000758		neutrophil activation (GO:0042119)	494	10	2.47	+	4.05	0.000209	0.0205		Positive regulation of cell adhesion (GO:0045785)	430	13	3.54	0.000107	0.0106				Neutrophil activation (GO:0042119)	495	23	3.63	2.07e-07
pronephric field specification (GO:0039003)	2	2	0.02	+	> 100	0.000443	0.0459		positive regulation of cell differentiation (GO:0045597)	837	24	9.39	+	2.56	3.37e-05	0.00328		visual system development (GO:0150063)	377	14	3.28	+	4.27	7.89e-06	0.000768		granulocyte activation (GO:0036230)	498	10	2.49	+	4.02	0.000223	0.0217		Cellular response to interferon-gamma (GO:0071346)	164	8	5.71	0.000112	0.0109				Embryo development (GO:0009790)	1027	35	2.66	2.15e-07
cellular process (GO:0009987)	15475	155	135.25	+	1.15	0.000479	0.046		vasculature development (GO:0001944)	525	18	5.89	+	3.06	3.85e-05	0.0037		chemotaxis (GO:0006935)	548	17	4.76	+	3.57	8.34e-06	0.000807		muscle cell migration (GO:0014812)	21	3	0.11	+	28.56	0.000224	0.0217		Developmental process involved in reproduction (GO:0003006)	977	21	2.52	0.000113	0.011				Homeostatic process (GO:0042592)	1686	48	2.22	2.27e-07
pattern specification involved in pronephros development (GO:0039017)	2	2	0.02	+	> 100	0.000443	0.0462		response to lipid (GO:0033993)	844	24	9.47	+	2.54	3.83e-05	0.0037		taxis (GO:0042330)	550	17	4.78	+	3.56	8.74e-06	0.000835		response to temperature stimulus (GO:0009266)	168	6	0.84	+	7.14	0.000236	0.0227		Positive regulation of p38mapk cascade (GO:1900745)	26	4	18.02	0.000115	0.0111				Granulocyte activation (GO:0036230)	500	23	3.59	2.46e-07
inner ear development (GO:0048839)	202	8	1.77	+	4.53	0.000505	0.0482		positive regulation of protein modification process (GO:0031401)	1244	31	13.95	+	2.22	3.98e-05	0.0038		negative regulation of response to stimulus (GO:0048585)	1822	35	15.84	+	2.21	8.73e-06	0.00084		endoplasmic reticulum unfolded protein response (GO:0030968)	107	5	0.54	+	9.34	0.000244	0.0229		Negative regulation of nervous system development (GO:0051961)	317	11	4.06	0.000116	0.0111				Negative regulation of protein metabolic process (GO:0051248)	1135	37	2.55	2.7e-07
									response to other organism (GO:0051707)	1427	34	16.01	+	2.12	4.02e-05	0.00382		collagen-activated tyrosine kinase receptor signaling pathway (GO:0038063)	12	4	0.1	+	38.35	8.95e-06	0.00085		negative regulation of programmed cell death (GO:0043069)	932	14	4.66	+	3	0.000246	0.0229		Collagen biosynthetic process (GO:0032964)	9	3	39.05	0.000124	0.0117				Positive regulation of cell adhesion (GO:0045785)	430	21	3.81	3.3e-07
									response to external biotic stimulus (GO:0043207)	1429	34	16.03	+	2.12	4.09e-05	0.00386		sensory system development (GO:0048880)	383	14	3.33	+	4.21	9.37e-06	0.000885		regulation of smooth muscle cell-matrix adhesion (GO:2000097)	3	2	0.02	+	> 100	0.000243	0.0229		Ossification (GO:0001503)	265	10	4.42	0.000123	0.0117				Response to nitrogen compound (GO:1901698)	1096	36	2.57	3.35e-07
									regulation of ERK1 and ERK2 cascade (GO:0070372)	295	13	3.31	+	3.93	4.29e-05	0.00401		calcium ion homeostasis (GO:0055074)	442	15	3.84	+	3.9	1.05e-05	0.000979		VEGF-activated platelet-derived growth factor receptor signaling pathway (GO:0038086)	3	2	0.02	+	> 100	0.000243	0.0231		Urogenital system development (GO:0001655)	319	11	4.04	0.000122	0.0117				Reproductive structure development (GO:0048608)	432	21	3.8	3.55e-07
									negative regulation of cellular component movement (GO:0051271)	295	13	3.31	+	3.93	4.29e-05	0.00403		negative regulation of cell adhesion (GO:0007162)	284	12	2.47	+	4.86	1.05e-05	0.000983		positive regulation of cell proliferation by VEGF-activated platelet derived growth factor receptor signaling pathway (GO:0038091)	3	2	0.02	+	> 100	0.000243	0.0232		Gonad development (GO:0008406)	215	9	4.9	0.000128	0.0119				Positive regulation of protein modification process (GO:0031401)	1243	39	2.45	3.68e-07
									endothelial cell development (GO:0001885)	52	6	0.58	+	10.29	4.36e-05	0.00405		regulation of programmed cell death (GO:0043067)	1528	31	13.28	+	2.33	1.08e-05	0.001		hyperosmotic response (GO:0006972)	22	3	0.11	+	27.27	0.000254	0.0236		Negative regulation of cell migration (GO:0030336)	266	10	4.4	0.000127	0.0119				Myeloid leukocyte mediated immunity (GO:0002444)	514	23	3.49	3.9e-07
									positive regulation of endothelial cell migration (GO:0010595)	109	8	1.22	+	6.54	4.9e-05	0.00452		carbohydrate derivative catabolic process (GO:1901136)	194	10	1.69	+	5.93	1.14e-05	0.00105		positive regulation of multicellular organismal process (GO:0051240)	1429	18	7.15	+	2.52	0.000263	0.0243		Positive regulation of locomotion (GO:0040017)	565	15	3.11	0.00013	0.012				Regulation of catalytic activity (GO:0050790)	2392	60	1.96	3.89e-07
									establishment of localization (GO:0051234)	4683	80	52.53	+	1.52	5.15e-05	0.00472		kidney development (GO:0001822)	290	12	2.52	+	4.76	1.28e-05	0.00117		regulation of endopeptidase activity (GO:0052548)	424	9	2.12	+	4.24	0.000313	0.0287		Positive regulation of cellular component movement (GO:0051272)	566	15	3.1	0.000132	0.0122				Reproductive process (GO:0022414)	1453	43	2.31	4.02e-07
									intestinal absorption (GO:0050892)	32	5	0.36	+	13.93	5.25e-05	0.00478		response to vitamin (GO:0033273)	84	7	0.73	+	9.59	1.38e-05	0.00126		negative regulation of endopeptidase activity (GO:0010951)	252	7	1.26	+	5.55	0.000316	0.0288		Regulation of neurogenesis (GO:0050767)	845	19	2.63	0.000139	0.0128				Reproductive system development (GO:0061458)	436	21	3.76	4.09e-07
									cell junction organization (GO:0034330)	491	17	5.51	+	3.09	5.64e-05	0.00511		negative regulation of cell population proliferation (GO:0008285)	698	19	6.07	+	3.13	1.46e-05	0.00132		regulation of platelet-derived growth factor receptor signaling pathway (GO:0010640)	24	3	0.12	+	24.99	0.000321	0.0289		Sex differentiation (GO:0007548)	270	10	4.34	0.000143	0.013				Cellular response to hypoxia (GO:0071456)	193	14	5.66	4.2e-07
									response to stress (GO:0006950)	3648	66	40.92	+	1.61	6e-05	0.00538		cytokine-mediated signaling pathway (GO:0019221)	701	19	6.09	+	3.12	1.54e-05	0.00139		response to hyperoxia (GO:0055093)	24	3	0.12	+	24.99	0.000321	0.0291		Negative regulation of phosphate metabolic process (GO:0045936)	572	15	3.07	0.000148	0.0134				Reproduction (GO:0000003)	1456	43	2.31	4.19e-07
									establishment of endothelial barrier (GO:0061028)	33	5	0.37	+	13.51	5.99e-05	0.0054		extracellular matrix assembly (GO:0085029)	32	5	0.28	+	17.98	1.57e-05	0.0014		heart development (GO:0007507)	524	10	2.62	+	3.82	0.000331	0.0297		Negative regulation of phosphorus metabolic process (GO:0010563)	573	15	3.07	0.00015	0.0136				Response to organonitrogen compound (GO:0010243)	1011	34	2.63	4.38e-07
									RNA processing (GO:0006396)	922	0	10.34	-	< 0.01	6.3e-05	0.00556		positive regulation of cell differentiation (GO:0045597)	837	21	7.27	+	2.89	1.67e-05	0.00149		regulation of proteolysis (GO:0030162)	735	12	3.68	+	3.26	0.000338	0.0302		Cell-matrix adhesion (GO:0007160)	128	7	6.41	0.000154	0.0138				Cell surface receptor signaling pathway (GO:0007166)	2519	62	1.92	4.42e-07
									regulation of phosphorus metabolic process (GO:0051174)	1833	40	20.56	+	1.95	6.29e-05	0.00557		negative regulation of response to wounding (GO:1903035)	90	7	0.78	+	8.95	2.1e-05	0.00186		movement of cell or subcellular component (GO:0006928)	1592	19	7.96	+	2.39	0.000341	0.0302		Development of primary sexual characteristics (GO:0045137)	221	9	4.77	0.000156	0.0139				Positive regulation of cellular protein metabolic process (GO:0032270)	1620	46	2.22	4.7e-07
									regulation of phosphate metabolic process (GO:0019220)	1832	40	20.55	+	1.95	6.25e-05	0.00557		homeostatic process (GO:0042592)	1668	32	14.5	+	2.21	2.48e-05	0.00218		maternal process involved in female pregnancy (GO:0060135)	63	4	0.32	+	12.7	0.000348	0.0307		Positive regulation of steroid metabolic process (GO:0045940)	29	4	16.16	0.000168	0.0149				Regulation of protein modification process (GO:0031399)	1877	51	2.12	4.8e-07
									regulation of protein metabolic process (GO:0051246)	2798	54	31.38	+	1.72	6.63e-05	0.00581		cellular response to organonitrogen compound (GO:0071417)	598	17	5.2	+	3.27	2.48e-05	0.00218		positive regulation of positive chemotaxis (GO:0050927)	25	3	0.13	+	23.99	0.000358	0.0314		Regulation of protein phosphorylation (GO:0001932)	1461	27	2.16	0.000169	0.0149				Neutrophil degranulation (GO:0043312)	482	22	3.56	5.13e-07
									negative regulation of catalytic activity (GO:0043086)	820	23	9.2	+	2.5	6.84e-05	0.00596		regulation of response to stress (GO:0080134)	1566	31	13.61	+	2.28	2.51e-05	0.00219		regulation of odontoblast differentiation (GO:1901329)	4	2	0.02	+	99.98	0.000363	0.0317		Regulation of response to wounding (GO:1903034)	175	8	5.35	0.000171	0.015				Positive regulation of smooth muscle cell proliferation (GO:0048661)	89	10	8.77	5.11e-07
									blood vessel development (GO:0001568)	502	17	5.63	+	3.02	7.33e-05	0.00632		collagen metabolic process (GO:0032963)	62	6	0.54	+	11.13	2.65e-05	0.00229		animal organ morphogenesis (GO:0009887)	971	14	4.86	+	2.88	0.00037	0.032		Regulation of embryonic development (GO:0045995)	131	7	6.26	0.000177	0.0154				Positive regulation of transport (GO:0051050)	1019	34	2.61	5.21e-07
									cell-cell junction organization (GO:0045216)	187	10	2.1	+	4.77	7.33e-05	0.00635		multi-multicellular organism process (GO:0044706)	215	10	1.87	+	5.35	2.66e-05	0.0023		negative regulation of peptidase activity (GO:0010466)	261	7	1.31	+	5.36	0.000388	0.0335		Regulation of epithelial cell migration (GO:0010632)	226	9	4.66	0.000183	0.0158				Respiratory system development (GO:0060541)	198	14	5.52	5.61e-07
									negative regulation of cell-cell adhesion (GO:0022408)	188	10	2.11	+	4.74	7.64e-05	0.00656		positive regulation of cellular metabolic process (GO:0031325)	3385	52	29.42	+	1.77	2.72e-05	0.00233		regulation of anatomical structure morphogenesis (GO:0022603)	977	14	4.89	+	2.87	0.000393	0.0337		Negative regulation of secretion (GO:0051048)	226	9	4.66	0.000183	0.0159				Positive regulation of protein metabolic process (GO:0051247)	1733	48	2.16	5.78e-07
									regulation of actin filament-based process (GO:0032970)	406	15	4.55	+	3.29	7.76e-05	0.00662		positive regulation of developmental process (GO:0051094)	1277	27	11.1	+	2.43	2.86e-05	0.00242		response to external stimulus (GO:0009605)	2532	26	12.66	+	2.05	0.000402	0.0337		Negative regulation of cell motility (GO:2000146)	281	10	4.17	0.000195	0.0165				Neutrophil activation involved in immune response (GO:0002283)	486	22	3.54	5.86e-07
									regulation of protein modification process (GO:0031399)	1879	40	21.08	+	1.9	8.56e-05	0.00727		divalent inorganic cation homeostasis (GO:0072507)	483	15	4.2	+	3.57	2.86e-05	0.00243		cellular chemical homeostasis (GO:0055082)	749	12	3.75	+	3.2	0.0004	0.0337		Regulation of biological quality (GO:0065008)	4085	56	1.61	0.000194	0.0166				Regulation of protein serine/threonine kinase activity (GO:0071900)	527	23	3.41	5.91e-07
									transport (GO:0006810)	4543	77	50.96	+	1.51	8.72e-05	0.00728		regulation of metallopeptidase activity (GO:1905048)	17	4	0.15	+	27.07	2.84e-05	0.00243		embryonic placenta morphogenesis (GO:0060669)	26	3	0.13	+	23.07	0.000398	0.0338		Regulation of interleukin-2 production (GO:0032663)	58	5	10.1	0.000194	0.0167				Regulation of metabolic process (GO:0019222)	7021	130	1.45	6.17e-07
									response to biotic stimulus (GO:0009607)	1464	34	16.42	+	2.07	8.72e-05	0.00732		carbohydrate derivative metabolic process (GO:1901135)	1011	23	8.79	+	2.62	2.93e-05	0.00246		regulation of positive chemotaxis (GO:0050926)	26	3	0.13	+	23.07	0.000398	0.034		Collagen-activated tyrosine kinase receptor signaling pathway (GO:0038063)	11	3	31.95	0.000203	0.017				Negative regulation of blood coagulation (GO:0030195)	51	8	12.25	7.47e-07
									amino acid import (GO:0043090)	36	5	0.4	+	12.38	8.7e-05	0.00734		cellular calcium ion homeostasis (GO:0006874)	427	14	3.71	+	3.77	3.01e-05	0.00251		localization (GO:0051179)	5832	46	29.17	+	1.58	0.000416	0.0344		Regulation of immune system process (GO:0002682)	1733	30	2.03	0.000202	0.017				Endoderm formation (GO:0001706)	51	8	12.25	7.47e-07
									regulation of membrane permeability (GO:0090559)	88	7	0.99	+	7.09	9.11e-05	0.00756		negative regulation of locomotion (GO:0040013)	318	12	2.76	+	4.34	3.07e-05	0.00255		receptor internalization (GO:0031623)	66	4	0.33	+	12.12	0.000412	0.0344		Regulation of lipid catabolic process (GO:0050994)	59	5	9.93	0.000209	0.0175				Cellular response to decreased oxygen levels (GO:0036294)	203	14	5.39	7.42e-07
									regulation of actin cytoskeleton organization (GO:0032956)	365	14	4.09	+	3.42	9.21e-05	0.00761		positive regulation of intracellular signal transduction (GO:1902533)	1016	23	8.83	+	2.6	3.16e-05	0.00257		negative regulation of proteolysis (GO:0045861)	349	8	1.75	+	4.58	0.000415	0.0345		Cell-cell signaling (GO:0007267)	1167	23	2.31	0.000215	0.0179				Blood vessel morphogenesis (GO:0048514)	415	20	3.76	7.73e-07
									blood vessel morphogenesis (GO:0048514)	415	15	4.65	+	3.22	9.81e-05	0.00807		regulation of cytokine production (GO:0001817)	739	19	6.42	+	2.96	3.13e-05	0.00257		regulation of cell-matrix adhesion (GO:0001952)	123	5	0.62	+	8.13	0.000451	0.0371		Cellular response to nitrogen compound (GO:1901699)	662	16	2.83	0.000219	0.0181				Cellular response to stress (GO:0033554)	1761	48	2.13	7.79e-07
									negative regulation of cell cycle phase transition (GO:1901988)	235	11	2.64	+	4.17	0.0001	0.00822		positive regulation of protein phosphorylation (GO:0001934)	1015	23	8.82	+	2.61	3.11e-05	0.00257		embryo development (GO:0009790)	994	14	4.97	+	2.82	0.000466	0.0381		Regulation of fibroblast growth factor receptor signaling pathway (GO:0040036)	32	4	14.64	0.000237	0.0195				Positive regulation of cell death (GO:0010942)	710	27	2.97	8.04e-07
									epithelial cell proliferation (GO:0050673)	90	7	1.01	+	6.93	0.000104	0.00841		negative regulation of signal transduction (GO:0009968)	1290	27	11.21	+	2.41	3.15e-05	0.00257		regulation of inflammatory response (GO:0050727)	550	10	2.75	+	3.64	0.00048	0.0391		Negative regulation of molecular function (GO:0044092)	1178	23	2.29	0.000239	0.0195				Negative regulation of hemostasis (GO:1900047)	52	8	12.01	8.52e-07
									negative regulation of response to stimulus (GO:0048585)	1822	39	20.44	+	1.91	0.000104	0.00843		positive regulation of cell adhesion (GO:0045785)	431	14	3.75	+	3.74	3.32e-05	0.00266		embryonic organ development (GO:0048568)	453	9	2.27	+	3.97	0.0005	0.0405		Response to wounding (GO:0009611)	533	14	3.08	0.000242	0.0197				Cell activation involved in immune response (GO:0002263)	626	25	3.12	9.02e-07
									positive regulation of macromolecule metabolic process (GO:0010604)	3566	64	40	+	1.6	0.000108	0.00871		negative regulation of cell-matrix adhesion (GO:0001953)	38	5	0.33	+	15.14	3.32e-05	0.00267		vasculogenesis (GO:0001570)	70	4	0.35	+	11.43	0.000509	0.0408		Response to interferon-gamma (GO:0034341)	186	8	5.04	0.000255	0.0205				Myeloid leukocyte activation (GO:0002274)	584	24	3.21	9.3e-07
									positive regulation of cell-cell adhesion (GO:0022409)	280	12	3.14	+	3.82	0.000109	0.00872		tissue morphogenesis (GO:0048729)	550	16	4.78	+	3.35	3.31e-05	0.00268		regulation of peptidase activity (GO:0052547)	454	9	2.27	+	3.96	0.000508	0.0409		Cellular component organization (GO:0016043)	5658	71	1.47	0.000254	0.0206				Regulation of cell-matrix adhesion (GO:0001952)	121	11	7.1	9.64e-07
									response to bacterium (GO:0009617)	734	21	8.23	+	2.55	0.00011	0.00874		negative regulation of cell communication (GO:0010648)	1386	28	12.05	+	2.32	3.39e-05	0.0027		osteoblast differentiation (GO:0001649)	127	5	0.64	+	7.87	0.000519	0.0412		Negative regulation of cell-substrate adhesion (GO:0010812)	62	5	9.45	0.000259	0.0208				Leukocyte degranulation (GO:0043299)	504	22	3.41	1.05e-06
									regulation of stress fiber assembly (GO:0051492)	92	7	1.03	+	6.78	0.000118	0.00937		regulation of smooth muscle cell proliferation (GO:0048660)	135	8	1.17	+	6.82	3.43e-05	0.00272		negative regulation of developmental process (GO:0051093)	887	13	4.44	+	2.93	0.000522	0.0412		Regulation of mesenchymal cell proliferation (GO:0010464)	33	4	14.2	0.000264	0.021				Aging (GO:0007568)	279	16	4.48	1.22e-06
									regulation of organelle organization (GO:0033043)	1207	29	13.54	+	2.14	0.000123	0.00964		lymph node development (GO:0048535)	18	4	0.16	+	25.57	3.45e-05	0.00273		positive regulation of apoptotic signaling pathway (GO:2001235)	127	5	0.64	+	7.87	0.000519	0.0414		Leukocyte chemotaxis (GO:0030595)	142	7	5.77	0.000283	0.0222				Inflammatory response (GO:0006954)	513	22	3.35	1.38e-06
									regulation of endopeptidase activity (GO:0052548)	424	15	4.76	+	3.15	0.000123	0.00968		negative regulation of cell migration (GO:0030336)	271	11	2.36	+	4.67	3.51e-05	0.00274		cellular homeostasis (GO:0019725)	890	13	4.45	+	2.92	0.000539	0.0423		Female pregnancy (GO:0007565)	189	8	4.96	0.000282	0.0223				Negative regulation of coagulation (GO:0050819)	56	8	11.16	1.41e-06
									semaphorin-plexin signaling pathway (GO:0071526)	39	5	0.44	+	11.43	0.000123	0.00969		negative regulation of signaling (GO:0023057)	1389	28	12.07	+	2.32	3.5e-05	0.00275		RNA metabolic process (GO:0016070)	1599	0	8	-	< 0.01	0.000558	0.0434		Negative regulation of protein phosphorylation (GO:0001933)	413	12	3.4	0.000282	0.0224				Leukocyte activation (GO:0045321)	923	31	2.62	1.52e-06
									apoptotic signaling pathway (GO:0097190)	286	12	3.21	+	3.74	0.000132	0.0102		negative regulation of cell death (GO:0060548)	1025	23	8.91	+	2.58	3.61e-05	0.00281		cellular divalent inorganic cation homeostasis (GO:0072503)	460	9	2.3	+	3.91	0.000557	0.0435		Blood vessel morphogenesis (GO:0048514)	415	12	3.39	0.000294	0.023				Cellular metal ion homeostasis (GO:0006875)	560	23	3.21	1.6e-06
									animal organ morphogenesis (GO:0009887)	971	25	10.89	+	2.3	0.000135	0.0104		extracellular matrix disassembly (GO:0022617)	66	6	0.57	+	10.46	3.67e-05	0.00284		negative regulation of fibroblast proliferation (GO:0048147)	30	3	0.15	+	20	0.000586	0.0453		Regulation of heat generation (GO:0031650)	13	3	27.03	0.000308	0.024				Regulation of cytokine production (GO:0001817)	739	27	2.85	1.68e-06
									cell-cell junction assembly (GO:0007043)	127	8	1.42	+	5.62	0.000134	0.0104		cellular response to lipid (GO:0071396)	500	15	4.35	+	3.45	4.2e-05	0.00323		cellular response to unfolded protein (GO:0034620)	132	5	0.66	+	7.57	0.000615	0.0474		Regulation of fatty acid metabolic process (GO:0019217)	102	6	6.89	0.000317	0.0246				Myeloid cell activation involved in immune response (GO:0002275)	520	22	3.3	1.71e-06
									regulation of leukocyte proliferation (GO:0070663)	244	11	2.74	+	4.02	0.000138	0.0106		peripheral nervous system axon regeneration (GO:0014012)	6	3	0.05	+	57.53	5.09e-05	0.0039		aging (GO:0007568)	283	7	1.42	+	4.95	0.000621	0.0476		Gland development (GO:0048732)	419	12	3.35	0.00032	0.0247				Cellular response to oxygen levels (GO:0071453)	220	14	4.97	1.82e-06
									leukocyte migration (GO:0050900)	381	14	4.27	+	3.28	0.000142	0.0108		cell-cell signaling (GO:0007267)	1123	24	9.76	+	2.46	5.14e-05	0.00392		regulation of cellular protein metabolic process (GO:0032268)	2661	26	13.31	+	1.95	0.000629	0.048		Regulation of response to external stimulus (GO:0032101)	1208	23	2.23	0.000322	0.0247				Negative regulation of cellular protein metabolic process (GO:0032269)	1058	34	2.51	1.82e-06
									positive regulation of transferase activity (GO:0051347)	693	20	7.77	+	2.57	0.000143	0.0109		cellular process (GO:0009987)	15475	157	134.5	+	1.17	5.36e-05	0.00407		nucleobase-containing compound metabolic process (GO:0006139)	2713	3	13.57	-	0.22	0.000641	0.0482		Negative regulation of cytokine secretion (GO:0050710)	66	5	8.87	0.00034	0.026				Response to extracellular stimulus (GO:0009991)	524	22	3.28	1.93e-06
									positive regulation of cellular component organization (GO:0051130)	1160	28	13.01	+	2.15	0.000156	0.0118		cellular response to lipopolysaccharide (GO:0071222)	188	9	1.63	+	5.51	5.47e-05	0.00413		eye development (GO:0001654)	373	8	1.87	+	4.29	0.000636	0.0483		Response to peptide (GO:1901652)	486	13	3.13	0.000342	0.026				Morphogenesis of a branching epithelium (GO:0061138)	160	12	5.86	2.05e-06
									positive regulation of catalytic activity (GO:0043085)	1474	33	16.53	+	2	0.000168	0.0126		negative regulation of cell motility (GO:2000146)	286	11	2.49	+	4.43	5.61e-05	0.00421		response to increased oxygen levels (GO:0036296)	31	3	0.16	+	19.35	0.00064	0.0484		Programmed cell death (GO:0012501)	1042	21	2.36	0.000362	0.0271				Muscle structure development (GO:0061061)	485	21	3.38	2.09e-06
									response to oxygen-containing compound (GO:1901700)	1596	35	17.9	+	1.96	0.000171	0.0128		blood coagulation (GO:0007596)	291	11	2.53	+	4.35	6.51e-05	0.00487		endoderm development (GO:0007492)	75	4	0.38	+	10.66	0.000653	0.0488		Positive regulation of small molecule metabolic process (GO:0062013)	148	7	5.54	0.000359	0.0272				Positive regulation of programmed cell death (GO:0043068)	658	25	2.97	2.13e-06
									regulation of mitotic cell cycle (GO:0007346)	597	18	6.7	+	2.69	0.000185	0.0138		cellular divalent inorganic cation homeostasis (GO:0072503)	460	14	4	+	3.5	6.56e-05	0.00488		transition metal ion homeostasis (GO:0055076)	134	5	0.67	+	7.46	0.000657	0.0489		Regulation of cell growth (GO:0001558)	425	12	3.31	0.000362	0.0273				Cellular response to endogenous stimulus (GO:0071495)	1187	36	2.37	2.16e-06
									circulatory system development (GO:0072359)	871	23	9.77	+	2.35	0.0002	0.0149		regulation of metabolic process (GO:0019222)	6989	87	60.74	+	1.43	6.62e-05	0.00491		epithelial cell differentiation (GO:0030855)	683	11	3.42	+	3.22	0.000676	0.0499		Collagen-activated signaling pathway (GO:0038065)	14	3	25.1	0.000372	0.0277				Regulation of chemotaxis (GO:0050920)	225	14	4.86	2.33e-06
									regulation of actomyosin structure organization (GO:0110020)	101	7	1.13	+	6.18	0.000203	0.015		coagulation (GO:0050817)	293	11	2.55	+	4.32	6.91e-05	0.0051		intracellular sequestering of iron ion (GO:0006880)	6	2	0.03	+	66.65	0.000673	0.0499		Response to nutrient levels (GO:0031667)	491	13	3.1	0.000376	0.0279				Leukocyte activation involved in immune response (GO:0002366)	622	24	3.01	2.67e-06
									response to endogenous stimulus (GO:0009719)	1417	32	15.89	+	2.01	0.000205	0.015		heart development (GO:0007507)	524	15	4.55	+	3.29	7.01e-05	0.00515											Regulation of response to stress (GO:0080134)	1627	28	2.02	0.000387	0.0286				Localization (GO:0051179)	5845	111	1.48	2.74e-06
									negative regulation of MAPK cascade (GO:0043409)	174	9	1.95	+	4.61	0.000213	0.0156		muscle system process (GO:0003012)	294	11	2.56	+	4.3	7.11e-05	0.0052											Response to growth hormone (GO:0060416)	37	4	12.66	0.000394	0.029				Regulation of hydrolase activity (GO:0051336)	1297	38	2.29	2.76e-06
									regulation of epithelial cell proliferation (GO:0050678)	349	13	3.91	+	3.32	0.000216	0.0157		negative regulation of wound healing (GO:0061045)	75	6	0.65	+	9.2	7.15e-05	0.0052											Supramolecular fiber organization (GO:0097435)	497	13	3.06	0.00042	0.0308				Positive regulation of nitrogen compound metabolic process (GO:0051173)	3274	72	1.72	2.86e-06
									negative regulation of mitotic cell cycle (GO:0045930)	303	12	3.4	+	3.53	0.00022	0.0159		negative regulation of metallopeptidase activity (GO:1905049)	7	3	0.06	+	49.31	7.22e-05	0.00523											Cell chemotaxis (GO:0060326)	202	8	4.64	0.000433	0.031				Positive regulation of protein kinase activity (GO:0045860)	538	22	3.19	2.91e-06
									defense response (GO:0006952)	1429	32	16.03	+	2	0.000223	0.0161		negative regulation of cellular component movement (GO:0051271)	295	11	2.56	+	4.29	7.32e-05	0.00526											Regulation of immune response (GO:0050776)	1151	22	2.24	0.000425	0.031				Negative regulation of nitrogen compound metabolic process (GO:0051172)	2409	58	1.88	2.94e-06
									positive regulation of lymphocyte proliferation (GO:0050671)	138	8	1.55	+	5.17	0.00023	0.0165		regulation of epithelial cell proliferation (GO:0050678)	349	12	3.03	+	3.96	7.29e-05	0.00526											Regulation of gastrulation (GO:0010470)	38	4	12.33	0.000432	0.0311				Response to molecule of bacterial origin (GO:0002237)	337	17	3.94	2.97e-06
									positive regulation of mononuclear cell proliferation (GO:0032946)	139	8	1.56	+	5.13	0.000241	0.0172		hemostasis (GO:0007599)	296	11	2.57	+	4.28	7.54e-05	0.00539											Regulation of p38mapk cascade (GO:1900744)	38	4	12.33	0.000432	0.0312				Embryonic morphogenesis (GO:0048598)	583	23	3.08	3.05e-06
									intracellular signal transduction (GO:0035556)	1680	36	18.84	+	1.91	0.000243	0.0172		cellular response to nitrogen compound (GO:1901699)	656	17	5.7	+	2.98	7.58e-05	0.00539											Negative regulation of kinase activity (GO:0033673)	255	9	4.13	0.000431	0.0313				Morphogenesis of a branching structure (GO:0001763)	169	12	5.55	3.5e-06
									regulation of actin filament bundle assembly (GO:0032231)	104	7	1.17	+	6	0.000241	0.0172		cellular response to molecule of bacterial origin (GO:0071219)	197	9	1.71	+	5.26	7.72e-05	0.00547											RNA metabolic process (GO:0016070)	1692	3	0.21	0.000443	0.0316				Negative regulation of cell differentiation (GO:0045596)	724	26	2.8	3.56e-06
									negative chemotaxis (GO:0050919)	46	5	0.52	+	9.69	0.000249	0.0176		regulation of cell junction assembly (GO:1901888)	198	9	1.72	+	5.23	8.01e-05	0.00565											Eye morphogenesis (GO:0048592)	154	7	5.32	0.000452	0.0321				Positive regulation of protein kinase B signaling (GO:0051897)	170	12	5.51	3.7e-06
									protein O-linked glycosylation (GO:0006493)	105	7	1.18	+	5.94	0.000255	0.0179		response to bacterium (GO:0009617)	734	18	6.38	+	2.82	9.18e-05	0.00645											Positive regulation of cell death (GO:0010942)	710	16	2.64	0.000466	0.0329				Negative regulation of metabolic process (GO:0009892)	3098	69	1.74	3.73e-06
									positive regulation of defense response (GO:0031349)	356	13	3.99	+	3.26	0.00026	0.0181		central nervous system development (GO:0007417)	1019	22	8.86	+	2.48	9.38e-05	0.00656											Positive regulation of fatty acid metabolic process (GO:0045923)	39	4	12.01	0.000473	0.0333				Negative regulation of macromolecule metabolic process (GO:0010605)	2846	65	1.78	3.9e-06
									regulation of cell differentiation (GO:0045595)	1573	34	17.64	+	1.93	0.000263	0.0183		negative regulation of membrane protein ectodomain proteolysis (GO:0051045)	8	3	0.07	+	43.15	9.87e-05	0.00686											Mesenchymal cell differentiation (GO:0048762)	156	7	5.26	0.000486	0.0341				Regulation of body fluid levels (GO:0050878)	506	21	3.24	3.95e-06
									positive regulation of growth (GO:0045927)	265	11	2.97	+	3.7	0.000274	0.0189		positive regulation of protein metabolic process (GO:0051247)	1703	31	14.8	+	2.09	0.000101	0.00696											Cell death (GO:0008219)	1079	21	2.28	0.00049	0.0341				Negative regulation of secretion by cell (GO:1903531)	203	13	5	4e-06
									type B pancreatic cell proliferation (GO:0044342)	9	3	0.1	+	29.72	0.000275	0.019		cell chemotaxis (GO:0060326)	206	9	1.79	+	5.03	0.000107	0.00738											Response to stress (GO:0006950)	3654	50	1.6	0.000495	0.0344				Cellular divalent inorganic cation homeostasis (GO:0072503)	466	20	3.35	4.19e-06
									lens fiber cell differentiation (GO:0070306)	25	4	0.28	+	14.26	0.000282	0.0193		response to stress (GO:0006950)	3648	53	31.71	+	1.67	0.00011	0.00755											Leukocyte migration (GO:0050900)	378	11	3.41	0.000499	0.0345				Regulation of MAPK cascade (GO:0043408)	732	26	2.77	4.31e-06
									regulation of chemotaxis (GO:0050920)	223	10	2.5	+	4	0.000288	0.0196		positive regulation of phosphate metabolic process (GO:0045937)	1163	24	10.11	+	2.37	0.000113	0.0077											Embryonic camera-type eye development (GO:0031076)	40	4	11.71	0.000517	0.0356				Cell aging (GO:0007569)	66	8	9.47	4.31e-06
									negative regulation of molecular function (GO:0044092)	1176	28	13.19	+	2.12	0.000288	0.0197		positive regulation of phosphorus metabolic process (GO:0010562)	1163	24	10.11	+	2.37	0.000113	0.00773											Regulation of hepatocyte proliferation (GO:2000345)	16	3	21.96	0.000523	0.0358				Positive regulation of protein serine/threonine kinase activity (GO:0071902)	350	17	3.79	4.8e-06
									negative regulation of phosphorylation (GO:0042326)	461	15	5.17	+	2.9	0.000295	0.02		positive regulation of ERK1 and ERK2 cascade (GO:0070374)	208	9	1.81	+	4.98	0.000115	0.00778											Positive regulation of nuclear division (GO:0051785)	73	5	8.02	0.000526	0.0359				Response to glucocorticoid (GO:0051384)	147	11	5.84	5.61e-06
									entry into host (GO:0044409)	108	7	1.21	+	5.78	0.000299	0.0202		bone mineralization (GO:0030282)	51	5	0.44	+	11.28	0.00012	0.00811											Negative regulation of cellular component organization (GO:0051129)	723	16	2.59	0.000564	0.0383				Positive regulation of chemotaxis (GO:0050921)	147	11	5.84	5.61e-06
									negative regulation of cell communication (GO:0010648)	1386	31	15.55	+	1.99	0.000302	0.0203		cellular metal ion homeostasis (GO:0006875)	552	15	4.8	+	3.13	0.000123	0.00826											Positive regulation of apoptotic process (GO:0043065)	652	15	2.69	0.000571	0.0386				Positive regulation of apoptotic process (GO:0043065)	652	24	2.87	5.77e-06
									cell morphogenesis involved in differentiation (GO:0000904)	568	17	6.37	+	2.67	0.000303	0.0203		odontogenesis (GO:0042476)	121	7	1.05	+	6.66	0.000123	0.00826											Neutrophil chemotaxis (GO:0030593)	76	5	7.71	0.000626	0.042				Odontogenesis (GO:0042476)	120	10	6.51	6.21e-06
									regulation of lymphocyte proliferation (GO:0050670)	225	10	2.52	+	3.96	0.000308	0.0205		positive regulation of cellular protein metabolic process (GO:0032270)	1625	30	14.12	+	2.12	0.000125	0.00833											Positive regulation of programmed cell death (GO:0043068)	658	15	2.67	0.000626	0.0421				Response to lipopolysaccharide (GO:0032496)	319	16	3.92	6.25e-06
									negative regulation of signaling (GO:0023057)	1389	31	15.58	+	1.99	0.000308	0.0205		cell junction organization (GO:0034330)	491	14	4.27	+	3.28	0.000128	0.00849											Regulation of small molecule metabolic process (GO:0062012)	454	12	3.1	0.00064	0.0427				Angiogenesis (GO:0001525)	321	16	3.89	6.73e-06
									inflammatory response (GO:0006954)	516	16	5.79	+	2.76	0.000313	0.0207		regulation of macromolecule metabolic process (GO:0060255)	6459	81	56.14	+	1.44	0.00013	0.00856											Modulation of chemical synaptic transmission (GO:0050804)	455	12	3.09	0.000652	0.0434				Morphogenesis of an epithelium (GO:0002009)	441	19	3.36	6.94e-06
									regulation of mononuclear cell proliferation (GO:0032944)	227	10	2.55	+	3.93	0.00033	0.0217		metal ion homeostasis (GO:0055065)	620	16	5.39	+	2.97	0.00013	0.00859											Regulation of trans-synaptic signaling (GO:0099177)	456	12	3.08	0.000664	0.044				Positive regulation of kinase activity (GO:0033674)	615	23	2.92	7.1e-06
									positive regulation of metabolic process (GO:0009893)	3852	66	43.21	+	1.53	0.000342	0.0224		regulation of cell-matrix adhesion (GO:0001952)	123	7	1.07	+	6.55	0.000136	0.00891											Response to extracellular stimulus (GO:0009991)	524	13	2.91	0.00068	0.0449				Regulation of protein kinase activity (GO:0045859)	803	27	2.63	7.38e-06
									negative regulation of multicellular organismal process (GO:0051241)	1022	25	11.46	+	2.18	0.000348	0.0227		regulation of primary metabolic process (GO:0080090)	6057	77	52.64	+	1.46	0.000137	0.00896											Negative regulation of endodermal cell differentiation (GO:1903225)	3	2	78.09	0.000701	0.046				Regulation of cell activation (GO:0050865)	662	24	2.83	7.38e-06
									regulation of programmed cell death (GO:0043067)	1528	33	17.14	+	1.93	0.000351	0.0228		positive regulation of phosphorylation (GO:0042327)	1092	23	9.49	+	2.42	0.000142	0.00922											Positive regulation of steroid biosynthetic process (GO:0010893)	18	3	19.52	0.000709	0.0462				Regulation of macromolecule metabolic process (GO:0060255)	6474	118	1.42	7.58e-06
									negative regulation of cell cycle (GO:0045786)	576	17	6.46	+	2.63	0.000354	0.023		generation of neurons (GO:0048699)	1278	25	11.11	+	2.25	0.00015	0.0097											Negative regulation of fibroblast growth factor receptor signaling pathway (GO:0040037)	18	3	19.52	0.000709	0.0464				Divalent inorganic cation homeostasis (GO:0072507)	487	20	3.21	7.83e-06
									negative regulation of protein phosphorylation (GO:0001933)	419	14	4.7	+	2.98	0.000362	0.0234		basement membrane organization (GO:0071711)	28	4	0.24	+	16.44	0.000159	0.0102											Positive regulation of metabolic process (GO:0009893)	3920	52	1.55	0.000729	0.0473				Negative regulation of cell-cell adhesion (GO:0022408)	184	12	5.09	7.92e-06
									response to lipopolysaccharide (GO:0032496)	321	12	3.6	+	3.33	0.000365	0.0234		artery development (GO:0060840)	88	6	0.76	+	7.84	0.000164	0.0105											Multi-multicellular organism process (GO:0044706)	220	8	4.26	0.000743	0.048				Skeletal system development (GO:0001501)	489	20	3.19	8.29e-06
									regulation of defense response (GO:0031347)	856	22	9.6	+	2.29	0.000372	0.0237		regulation of nitrogen compound metabolic process (GO:0051171)	5869	75	51.01	+	1.47	0.000166	0.0106											Lipid biosynthetic process (GO:0008610)	599	14	2.74	0.00075	0.0483				Negative regulation of endopeptidase activity (GO:0010951)	254	14	4.3	8.74e-06
									regulation of binding (GO:0051098)	370	13	4.15	+	3.13	0.000371	0.0237		elastic fiber assembly (GO:0048251)	10	3	0.09	+	34.52	0.000169	0.0108											Organonitrogen compound metabolic process (GO:1901564)	5421	67	1.45	0.00077	0.0494				Response to nutrient levels (GO:0031667)	491	20	3.18	8.78e-06
									regulation of cell death (GO:0010941)	1665	35	18.68	+	1.87	0.000377	0.024		cellular response to biotic stimulus (GO:0071216)	220	9	1.91	+	4.71	0.000172	0.0109																				Metal ion homeostasis (GO:0055065)	624	23	2.88	8.91e-06
									angiogenesis (GO:0001525)	323	12	3.62	+	3.31	0.000385	0.0241		substrate adhesion-dependent cell spreading (GO:0034446)	56	5	0.49	+	10.27	0.000181	0.0114																				Response to steroid hormone (GO:0048545)	329	16	3.8	9.03e-06
									regulation of multicellular organismal development (GO:2000026)	1331	30	14.93	+	2.01	0.000384	0.0242		positive regulation of phosphatidylinositol 3-kinase signaling (GO:0014068)	90	6	0.78	+	7.67	0.000184	0.0115																				Positive regulation of extrinsic apoptotic signaling pathway (GO:2001238)	52	7	10.51	9.29e-06
									movement in host environment (GO:0052126)	113	7	1.27	+	5.52	0.000388	0.0242		roof of mouth development (GO:0060021)	90	6	0.78	+	7.67	0.000184	0.0116																				Tissue remodeling (GO:0048771)	99	9	7.1	9.48e-06
									positive regulation of MAPK cascade (GO:0043410)	526	16	5.9	+	2.71	0.000384	0.0243		embryonic skeletal system development (GO:0048706)	130	7	1.13	+	6.2	0.000188	0.0118																				Regulation of peptidyl-tyrosine phosphorylation (GO:0050730)	257	14	4.25	9.92e-06
									positive regulation of leukocyte proliferation (GO:0070665)	150	8	1.68	+	4.75	0.000392	0.0244		neuron projection regeneration (GO:0031102)	30	4	0.26	+	15.34	0.000202	0.0125																				Osteoblast differentiation (GO:0001649)	127	10	6.15	9.89e-06
									response to growth factor (GO:0070848)	528	16	5.92	+	2.7	0.0004	0.0248		regulation of neuron projection regeneration (GO:0070570)	30	4	0.26	+	15.34	0.000202	0.0126																				Negative regulation of phosphorylation (GO:0042326)	453	19	3.28	9.99e-06
									protein localization to cell periphery (GO:1990778)	233	10	2.61	+	3.83	0.000402	0.0248		negative regulation of neuron projection development (GO:0010977)	133	7	1.16	+	6.06	0.000215	0.0133																				Regulation of peptidase activity (GO:0052547)	454	19	3.27	1.03e-05
									digestion (GO:0007586)	114	7	1.28	+	5.47	0.000408	0.0251		biomineral tissue development (GO:0031214)	93	6	0.81	+	7.42	0.000217	0.0133																				Positive regulation of catalytic activity (GO:0043085)	1474	40	2.12	1.1e-05
									endothelial cell differentiation (GO:0045446)	81	6	0.91	+	6.6	0.000417	0.0255		embryonic morphogenesis (GO:0048598)	583	15	5.07	+	2.96	0.000219	0.0133																				Regulation of inflammatory response (GO:0050727)	543	21	3.02	1.11e-05
									positive regulation of epithelial cell migration (GO:0010634)	152	8	1.7	+	4.69	0.000427	0.026		biomineralization (GO:0110148)	93	6	0.81	+	7.42	0.000217	0.0134																				Positive regulation of MAPK cascade (GO:0043410)	545	21	3.01	1.17e-05
									negative regulation of cell cycle process (GO:0010948)	329	12	3.69	+	3.25	0.000451	0.0274		cell morphogenesis (GO:0000902)	721	17	6.27	+	2.71	0.000228	0.0138																				Cellular response to organic cyclic compound (GO:0071407)	545	21	3.01	1.17e-05
									positive regulation of protein kinase activity (GO:0045860)	536	16	6.01	+	2.66	0.000468	0.0282		localization (GO:0051179)	5832	74	50.69	+	1.46	0.000227	0.0138																				Cellular cation homeostasis (GO:0030003)	636	23	2.82	1.2e-05
									regulation of angiogenesis (GO:0045765)	283	11	3.17	+	3.47	0.000467	0.0283		regulation of cellular metabolic process (GO:0031323)	6275	78	54.54	+	1.43	0.000231	0.0139																				Negative regulation of secretion (GO:0051048)	226	13	4.49	1.19e-05
									positive regulation of cellular metabolic process (GO:0031325)	3385	59	37.97	+	1.55	0.00047	0.0283		negative regulation of cell development (GO:0010721)	180	8	1.56	+	5.11	0.000232	0.0139																				Endoderm development (GO:0007492)	77	8	8.11	1.22e-05
									negative regulation of cell adhesion (GO:0007162)	284	11	3.19	+	3.45	0.00048	0.0287		positive regulation of cytosolic calcium ion concentration (GO:0007204)	283	10	2.46	+	4.07	0.000237	0.0142																				Regulation of extrinsic apoptotic signaling pathway (GO:2001236)	161	11	5.34	1.26e-05
									regulation of proteolysis (GO:0030162)	735	20	8.24	+	2.43	0.000491	0.0292		negative regulation of cell junction assembly (GO:1901889)	32	4	0.28	+	14.38	0.000253	0.0151																				Gland development (GO:0048732)	419	18	3.35	1.26e-05
									protein localization to plasma membrane (GO:0072659)	196	9	2.2	+	4.09	0.00049	0.0292		cell activation (GO:0001775)	1075	22	9.34	+	2.35	0.000256	0.0152																				Negative regulation of peptidase activity (GO:0010466)	263	14	4.16	1.27e-05
									regulation of apoptotic process (GO:0042981)	1495	32	16.77	+	1.91	0.000503	0.0297		response to peptide hormone (GO:0043434)	401	12	3.49	+	3.44	0.000255	0.0152																				Regulation of secretion (GO:0051046)	830	27	2.54	1.31e-05
									placenta development (GO:0001890)	156	8	1.75	+	4.57	0.000503	0.0298		regulation of hydrolase activity (GO:0051336)	1298	25	11.28	+	2.22	0.000275	0.0162																				Positive regulation of peptidyl-tyrosine phosphorylation (GO:0050731)	194	12	4.83	1.31e-05
									regulation of vasculature development (GO:1901342)	286	11	3.21	+	3.43	0.000508	0.0298		blood circulation (GO:0008015)	405	12	3.52	+	3.41	0.000278	0.0164																				Regulation of protein kinase B signaling (GO:0051896)	228	13	4.45	1.3e-05
									neuron cellular homeostasis (GO:0070050)	30	4	0.34	+	11.89	0.000527	0.0307		hyaluronan metabolic process (GO:0030212)	33	4	0.29	+	13.95	0.000282	0.0164																				Regulation of growth (GO:0040008)	687	24	2.73	1.33e-05
									regulation of epidermal growth factor-activated receptor activity (GO:0007176)	30	4	0.34	+	11.89	0.000527	0.0308		glycosaminoglycan catabolic process (GO:0006027)	62	5	0.54	+	9.28	0.000282	0.0165																				Immune system process (GO:0002376)	2832	63	1.74	1.37e-05
									negative regulation of signal transduction (GO:0009968)	1290	29	14.47	+	2	0.000534	0.031		secretion (GO:0046903)	1092	22	9.49	+	2.32	0.000295	0.0171																				Ossification (GO:0001503)	265	14	4.13	1.38e-05
									embryo development (GO:0009790)	994	24	11.15	+	2.15	0.000537	0.0311		immune system process (GO:0002376)	2856	43	24.82	+	1.73	0.000298	0.0173																				Negative regulation of cell migration (GO:0030336)	266	14	4.11	1.43e-05
									cell cycle checkpoint (GO:0000075)	199	9	2.23	+	4.03	0.000544	0.0314		artery morphogenesis (GO:0048844)	63	5	0.55	+	9.13	0.000302	0.0174																				Positive regulation of epithelial cell proliferation (GO:0050679)	196	12	4.78	1.44e-05
									hemidesmosome assembly (GO:0031581)	12	3	0.13	+	22.29	0.000555	0.0319		positive regulation of vasoconstriction (GO:0045907)	34	4	0.3	+	13.54	0.000313	0.018																				Response to bacterium (GO:0009617)	738	25	2.65	1.45e-05
									response to molecule of bacterial origin (GO:0002237)	338	12	3.79	+	3.17	0.000568	0.0324		regulation of tube diameter (GO:0035296)	143	7	1.24	+	5.63	0.000328	0.0187																				Response to corticosteroid (GO:0031960)	164	11	5.24	1.48e-05
									mitotic cell cycle checkpoint (GO:0007093)	159	8	1.78	+	4.49	0.000567	0.0325		regulation of growth (GO:0040008)	675	16	5.87	+	2.73	0.00033	0.0188																				Regulation of endopeptidase activity (GO:0052548)	425	18	3.31	1.52e-05
									biological_process (GO:0008150)	17857	217	200.29	+	1.08	0.000582	0.033		regulation of blood vessel diameter (GO:0097746)	143	7	1.24	+	5.63	0.000328	0.0188																				Chemical homeostasis (GO:0048878)	1125	33	2.29	1.55e-05
									Unclassified (UNCLASSIFIED)	2738	14	30.71	-	0.46	0.000582	0.0331		cellular homeostasis (GO:0019725)	890	19	7.74	+	2.46	0.000332	0.0188																				Negative regulation of cellular metabolic process (GO:0031324)	2607	59	1.77	1.58e-05
									regeneration (GO:0031099)	160	8	1.79	+	4.46	0.00059	0.0333		regulation of tube size (GO:0035150)	144	7	1.25	+	5.59	0.000341	0.0191																				Regulation of MAP kinase activity (GO:0043405)	346	16	3.61	1.64e-05
									response to corticosteroid (GO:0031960)	161	8	1.81	+	4.43	0.000613	0.0344		regulation of epithelial cell differentiation (GO:0030856)	144	7	1.25	+	5.59	0.000341	0.0191																				Biological_process (GO:0008150)	17912	252	1.1	1.68e-05
									regulation of response to wounding (GO:1903034)	161	8	1.81	+	4.43	0.000613	0.0345		response to estradiol (GO:0032355)	144	7	1.25	+	5.59	0.000341	0.0192																				Cellular ion homeostasis (GO:0006873)	650	23	2.76	1.67e-05
									embryonic placenta development (GO:0001892)	88	6	0.99	+	6.08	0.00063	0.0352		muscle structure development (GO:0061061)	477	13	4.15	+	3.14	0.000341	0.0192																				Unclassified (UNCLASSIFIED)	2939	15	0.4	1.68e-05
									cellular response to growth factor stimulus (GO:0071363)	500	15	5.61	+	2.67	0.000668	0.0372		regulation of mesenchymal cell proliferation (GO:0010464)	35	4	0.3	+	13.15	0.000346	0.0193																				Response to ketone (GO:1901654)	201	12	4.66	1.83e-05
									negative regulation of growth (GO:0045926)	250	10	2.8	+	3.57	0.00068	0.0376		cellular chemical homeostasis (GO:0055082)	749	17	6.51	+	2.61	0.00035	0.0194																				Regulation of primary metabolic process (GO:0080090)	6088	111	1.42	1.86e-05
									positive regulation of epidermal growth factor-activated receptor activity (GO:0045741)	13	3	0.15	+	20.57	0.000678	0.0376		gland development (GO:0048732)	416	12	3.62	+	3.32	0.000352	0.0195																				Regulation of extrinsic apoptotic signaling pathway via death domain receptors (GO:1902041)	59	7	9.27	1.97e-05
									positive regulation of nitrogen compound metabolic process (GO:0051173)	3202	56	35.91	+	1.56	0.000686	0.0378		platelet-derived growth factor receptor signaling pathway (GO:0048008)	36	4	0.31	+	12.78	0.000382	0.0211																				Positive regulation of wound healing (GO:0090303)	59	7	9.27	1.97e-05
									positive regulation of kinase activity (GO:0033674)	613	17	6.88	+	2.47	0.0007	0.0384		cellular component morphogenesis (GO:0032989)	617	15	5.36	+	2.8	0.000393	0.0213																				Regulation of protein localization (GO:0032880)	1079	32	2.32	2.03e-05
									cellular component morphogenesis (GO:0032989)	617	17	6.92	+	2.46	0.000751	0.0411		cell migration involved in heart development (GO:0060973)	14	3	0.12	+	24.65	0.000391	0.0213																				Cell death (GO:0008219)	1079	32	2.32	2.03e-05
									regulation of blood vessel endothelial cell migration (GO:0043535)	93	6	1.04	+	5.75	0.000829	0.0452		negative regulation of stem cell proliferation (GO:2000647)	14	3	0.12	+	24.65	0.000391	0.0214																				Response to alcohol (GO:0097305)	239	13	4.25	2.09e-05
									cell-cell adhesion via plasma-membrane adhesion molecules (GO:0098742)	257	10	2.88	+	3.47	0.000833	0.0453		positive regulation of protein modification process (GO:0031401)	1244	24	10.81	+	2.22	0.000391	0.0215																				Positive regulation of cellular metabolic process (GO:0031325)	3452	72	1.63	2.14e-05
									response to abiotic stimulus (GO:0009628)	1162	26	13.03	+	1.99	0.000877	0.0475		chemical homeostasis (GO:0048878)	1127	22	9.8	+	2.25	0.000412	0.0223																				Negative regulation of cellular component movement (GO:0051271)	315	15	3.72	2.18e-05
									negative regulation of kinase activity (GO:0033673)	259	10	2.91	+	3.44	0.000882	0.0476		cellular response to transforming growth factor beta stimulus (GO:0071560)	149	7	1.3	+	5.41	0.000415	0.0224																				Regulation of protein secretion (GO:0050708)	483	19	3.07	2.35e-05
									regulation of wound healing (GO:0061041)	131	7	1.47	+	4.76	0.000894	0.0481		positive regulation of receptor signaling pathway via JAK-STAT (GO:0046427)	37	4	0.32	+	12.44	0.000421	0.0225																				Regulation of insulin-like growth factor receptor signaling pathway (GO:0043567)	23	5	16.98	2.41e-05
									endothelium development (GO:0003158)	95	6	1.07	+	5.63	0.00092	0.0493		aminoglycan catabolic process (GO:0006026)	68	5	0.59	+	8.46	0.00042	0.0225																				Leukocyte mediated immunity (GO:0002443)	762	25	2.56	2.43e-05
																		positive regulation of response to wounding (GO:1903036)	68	5	0.59	+	8.46	0.00042	0.0226																				Negative regulation of cell motility (GO:2000146)	281	14	3.89	2.56e-05
																		regulation of myosin light chain kinase activity (GO:0035504)	2	2	0.02	+	> 100	0.000438	0.0232																				Inorganic ion homeostasis (GO:0098771)	716	24	2.62	2.55e-05
																		positive regulation of myosin light chain kinase activity (GO:0035505)	2	2	0.02	+	> 100	0.000438	0.0232																				Endodermal cell differentiation (GO:0035987)	41	6	11.43	2.68e-05
																		negative regulation of smooth muscle cell-matrix adhesion (GO:2000098)	2	2	0.02	+	> 100	0.000438	0.0233																				Positive regulation of gene expression (GO:0010628)	2363	54	1.78	2.68e-05
																		reproductive structure development (GO:0048608)	428	12	3.72	+	3.23	0.000451	0.0238																				Response to temperature stimulus (GO:0009266)	176	11	4.88	2.74e-05
																		eye morphogenesis (GO:0048592)	152	7	1.32	+	5.3	0.000466	0.0245																				Negative regulation of immune system process (GO:0002683)	625	22	2.75	2.77e-05
																		regulation of cell-substrate junction organization (GO:0150116)	70	5	0.61	+	8.22	0.000476	0.0249																				Regulation of smooth muscle cell migration (GO:0014910)	63	7	8.68	2.9e-05
																		reproductive system development (GO:0061458)	432	12	3.75	+	3.2	0.000489	0.0255																				Positive regulation of leukocyte migration (GO:0002687)	145	10	5.39	2.9e-05
																		cellular response to environmental stimulus (GO:0104004)	312	10	2.71	+	3.69	0.000499	0.0258																				Regulation of actin filament-based process (GO:0032970)	405	17	3.28	2.92e-05
																		cellular cation homeostasis (GO:0030003)	632	15	5.49	+	2.73	0.000501	0.0258																				Regulation of kinase activity (GO:0043549)	912	28	2.4	2.97e-05
																		regulation of protein serine/threonine kinase activity (GO:0071900)	497	13	4.32	+	3.01	0.000497	0.0258																				Regulation of osteoblast differentiation (GO:0045667)	116	9	6.06	3.08e-05
																		cellular response to abiotic stimulus (GO:0071214)	312	10	2.71	+	3.69	0.000499	0.0259																				Regulation of cellular metabolic process (GO:0031323)	6299	113	1.4	3.08e-05
																		response to retinoic acid (GO:0032526)	110	6	0.96	+	6.28	0.00051	0.0262																				Negative regulation of hormone secretion (GO:0046888)	64	7	8.54	3.18e-05
																		cation homeostasis (GO:0055080)	704	16	6.12	+	2.61	0.000517	0.0264																				Regulation of apoptotic signaling pathway (GO:2001233)	408	17	3.25	3.19e-05
																		neuron development (GO:0048666)	850	18	7.39	+	2.44	0.000525	0.0268																				Regulation of secretion by cell (GO:1903530)	775	25	2.52	3.18e-05
																		positive regulation of hydrolase activity (GO:0051345)	777	17	6.75	+	2.52	0.000526	0.0268																				Regulation of immune system process (GO:0002682)	1733	43	1.94	3.24e-05
																		regulation of Wnt signaling pathway (GO:0030111)	374	11	3.25	+	3.38	0.00053	0.0269																				Formation of primary germ layer (GO:0001704)	117	9	6.01	3.28e-05
																		response to transforming growth factor beta (GO:0071559)	156	7	1.36	+	5.16	0.00054	0.0273																				Regulation of leukocyte migration (GO:0002685)	214	12	4.38	3.28e-05
																		glycoprotein metabolic process (GO:0009100)	376	11	3.27	+	3.37	0.000554	0.0277																				Cellular response to chemical stress (GO:0062197)	288	14	3.8	3.31e-05
																		regulation of hepatocyte proliferation (GO:2000345)	16	3	0.14	+	21.57	0.000551	0.0277																				Response to drug (GO:0042493)	289	14	3.78	3.43e-05
																		endodermal cell differentiation (GO:0035987)	40	4	0.35	+	11.51	0.000553	0.0278																				Cell population proliferation (GO:0008283)	497	19	2.99	3.42e-05
																		morphogenesis of an epithelium (GO:0002009)	440	12	3.82	+	3.14	0.000572	0.0285																				Negative regulation of protein phosphorylation (GO:0001933)	413	17	3.21	3.7e-05
																		regulation of phospholipase activity (GO:0010517)	73	5	0.63	+	7.88	0.00057	0.0285																				Response to inorganic substance (GO:0010035)	546	20	2.86	3.79e-05
																		regulation of response to external stimulus (GO:0032101)	1203	23	10.46	+	2.2	0.000585	0.029																				VEGF-activated platelet-derived growth factor receptor signaling pathway (GO:0038086)	3	3	78.09	3.89e-05
																		regulation of neuron projection development (GO:0010975)	442	12	3.84	+	3.12	0.000595	0.0294																				Positive regulation of cell proliferation by VEGF-activated platelet derived growth factor receptor signaling pathway (GO:0038091)	3	3	78.09	3.89e-05
																		regulation of collagen metabolic process (GO:0010712)	41	4	0.36	+	11.22	0.000603	0.0294																				PERK-mediated unfolded protein response (GO:0036499)	12	4	26.03	4.03e-05
																		ion homeostasis (GO:0050801)	786	17	6.83	+	2.49	0.000597	0.0294																				Integrated stress response signaling (GO:0140467)	12	4	26.03	4.03e-05
																		positive regulation of receptor signaling pathway via STAT (GO:1904894)	41	4	0.36	+	11.22	0.000603	0.0295																				Response to mechanical stimulus (GO:0009612)	219	12	4.28	4.06e-05
																		morphogenesis of a branching epithelium (GO:0061138)	159	7	1.38	+	5.07	0.000602	0.0296																				Regulation of ERK1 and ERK2 cascade (GO:0070372)	294	14	3.72	4.1e-05
																		inorganic ion homeostasis (GO:0098771)	715	16	6.21	+	2.57	0.000608	0.0296																				Cellular response to biotic stimulus (GO:0071216)	220	12	4.26	4.23e-05
																		cellular ion homeostasis (GO:0006873)	647	15	5.62	+	2.67	0.000634	0.0308																				Cellular response to lipopolysaccharide (GO:0071222)	186	11	4.62	4.43e-05
																		vascular process in circulatory system (GO:0003018)	265	9	2.3	+	3.91	0.000639	0.0309																				Positive regulation of transferase activity (GO:0051347)	697	23	2.58	4.76e-05
																		negative regulation of fibroblast growth factor receptor signaling pathway (GO:0040037)	17	3	0.15	+	20.3	0.000644	0.031																				Regulation of calcium ion transport (GO:0051924)	260	13	3.9	4.8e-05
																		camera-type eye development (GO:0043010)	323	10	2.81	+	3.56	0.000648	0.0311																				Regulation of peptide secretion (GO:0002791)	513	19	2.89	5.15e-05
																		regulation of extracellular matrix organization (GO:1903053)	42	4	0.37	+	10.96	0.000656	0.0314																				Programmed cell death (GO:0012501)	1042	30	2.25	5.31e-05
																		regulation of ossification (GO:0030278)	116	6	1.01	+	5.95	0.000666	0.0317																				Cellular chemical homeostasis (GO:0055082)	752	24	2.49	5.4e-05
																		formation of primary germ layer (GO:0001704)	116	6	1.01	+	5.95	0.000666	0.0318																				Positive regulation of response to wounding (GO:1903036)	70	7	7.81	5.4e-05
																		regulation of tissue remodeling (GO:0034103)	76	5	0.66	+	7.57	0.000678	0.0322																				Positive regulation of hemostasis (GO:1900048)	28	5	13.95	5.53e-05
																		renal system process (GO:0003014)	117	6	1.02	+	5.9	0.000695	0.0328																				Positive regulation of blood coagulation (GO:0030194)	28	5	13.95	5.53e-05
																		gastrulation (GO:0007369)	163	7	1.42	+	4.94	0.000694	0.0328																				Cation homeostasis (GO:0055080)	704	23	2.55	5.52e-05
																		inflammatory response (GO:0006954)	516	13	4.48	+	2.9	0.000698	0.0329																				Intracellular signal transduction (GO:0035556)	1652	41	1.94	5.56e-05
																		regulation of smooth muscle cell-matrix adhesion (GO:2000097)	3	2	0.03	+	76.7	0.000726	0.0331																				Male sex differentiation (GO:0046661)	158	10	4.94	5.75e-05
																		VEGF-activated platelet-derived growth factor receptor signaling pathway (GO:0038086)	3	2	0.03	+	76.7	0.000726	0.0332																				Positive regulation of MAP kinase activity (GO:0043406)	266	13	3.82	5.99e-05
																		neuromuscular junction development (GO:0007528)	43	4	0.37	+	10.7	0.000712	0.0332																				Cellular response to hormone stimulus (GO:0032870)	565	20	2.76	5.98e-05
																		positive regulation of cell proliferation by VEGF-activated platelet derived growth factor receptor signaling pathway (GO:0038091)	3	2	0.03	+	76.7	0.000726	0.0333																				Hormone metabolic process (GO:0042445)	193	11	4.45	6.07e-05
																		regulation of defense response to virus by host (GO:0050691)	43	4	0.37	+	10.7	0.000712	0.0333																				Positive regulation of coagulation (GO:0050820)	29	5	13.46	6.41e-05
																		positive regulation of cytokine production (GO:0001819)	453	12	3.94	+	3.05	0.000733	0.0333																				Apoptotic process (GO:0006915)	910	27	2.32	6.64e-05
																		metanephric glomerulus morphogenesis (GO:0072275)	3	2	0.03	+	76.7	0.000726	0.0334																				Gastrulation (GO:0007369)	161	10	4.85	6.68e-05
																		cell-substrate junction assembly (GO:0007044)	43	4	0.37	+	10.7	0.000712	0.0334																				Cellular response to molecule of bacterial origin (GO:0071219)	196	11	4.38	6.93e-05
																		metanephric glomerulus vasculature morphogenesis (GO:0072276)	3	2	0.03	+	76.7	0.000726	0.0335																				Cellular homeostasis (GO:0019725)	915	27	2.3	7.18e-05
																		metanephric glomerular capillary formation (GO:0072277)	3	2	0.03	+	76.7	0.000726	0.0336																				Kidney development (GO:0001822)	273	13	3.72	7.71e-05
																		response to mechanical stimulus (GO:0009612)	215	8	1.87	+	4.28	0.000722	0.0336																				Negative regulation of locomotion (GO:0040013)	313	14	3.49	7.8e-05
																		negative regulation of endodermal cell differentiation (GO:1903225)	3	2	0.03	+	76.7	0.000726	0.0337																				Response to growth factor (GO:0070848)	531	19	2.79	8e-05
																		retina vasculature development in camera-type eye (GO:0061298)	18	3	0.16	+	19.18	0.000746	0.0338																				Response to peptide (GO:1901652)	486	18	2.89	8.12e-05
																		negative regulation of macromolecule metabolic process (GO:0010605)	2902	42	25.22	+	1.67	0.000773	0.0347																				Positive regulation of extrinsic apoptotic signaling pathway via death domain receptors (GO:1902043)	15	4	20.82	8.34e-05
																		cell-substrate junction organization (GO:0150115)	44	4	0.38	+	10.46	0.000772	0.0348																				Response to biotic stimulus (GO:0009607)	1452	37	1.99	8.81e-05
																		positive regulation of stem cell proliferation (GO:2000648)	44	4	0.38	+	10.46	0.000772	0.0349																				Regulation of vascular associated smooth muscle cell proliferation (GO:1904705)	52	6	9.01	9.01e-05
																		transmembrane receptor protein tyrosine kinase signaling pathway (GO:0007169)	524	13	4.55	+	2.85	0.000801	0.0359																				Immune effector process (GO:0002252)	1086	30	2.16	9.07e-05
																		morphogenesis of a branching structure (GO:0001763)	168	7	1.46	+	4.79	0.000823	0.0368																				Regulation of leukocyte cell-cell adhesion (GO:1903037)	318	14	3.44	9.16e-05
																		regulation of cell activation (GO:0050865)	667	15	5.8	+	2.59	0.000858	0.0382																				Male gonad development (GO:0008584)	135	9	5.21	9.29e-05
																		regulation of endothelial cell migration (GO:0010594)	170	7	1.48	+	4.74	0.000879	0.0391																				Urogenital system development (GO:0001655)	319	14	3.43	9.45e-05
																		positive regulation of phospholipase C activity (GO:0010863)	46	4	0.4	+	10	0.000901	0.0398																				Negative regulation of proteolysis (GO:0045861)	361	15	3.24	9.6e-05
																		bone remodeling (GO:0046849)	46	4	0.4	+	10	0.000901	0.0399																				Cellular senescence (GO:0090398)	32	5	12.2	9.74e-05
																		immune system development (GO:0002520)	671	15	5.83	+	2.57	0.00091	0.04																				Development of primary male sexual characteristics (GO:0046546)	136	9	5.17	9.8e-05
																		cell junction assembly (GO:0034329)	279	9	2.42	+	3.71	0.00091	0.0401																				Striated muscle cell differentiation (GO:0051146)	205	11	4.19	0.000101
																		positive regulation of cell-cell adhesion (GO:0022409)	280	9	2.43	+	3.7	0.000932	0.0409																				Response to estrogen (GO:0043627)	78	7	7.01	0.000102
																		response to other organism (GO:0051707)	1427	25	12.4	+	2.02	0.000946	0.0413																				Negative regulation of cytokine production (GO:0001818)	282	13	3.6	0.000105
																		regulation of catalytic activity (GO:0050790)	2384	36	20.72	+	1.74	0.00095	0.0414																				Renal system development (GO:0072001)	283	13	3.59	0.000109
																		response to external biotic stimulus (GO:0043207)	1429	25	12.42	+	2.01	0.000957	0.0416																				Immune response (GO:0006955)	1927	45	1.82	0.000112
																		regulation of phosphatidylinositol 3-kinase signaling (GO:0014066)	125	6	1.09	+	5.52	0.000967	0.0419																				Positive regulation of cytosolic calcium ion concentration (GO:0007204)	286	13	3.55	0.00012
																		response to vitamin A (GO:0033189)	20	3	0.17	+	17.26	0.000981	0.0423																				Regulation of nitrogen compound metabolic process (GO:0051171)	5895	105	1.39	0.000122
																		growth hormone receptor signaling pathway (GO:0060396)	20	3	0.17	+	17.26	0.000981	0.0424																				Fat cell differentiation (GO:0045444)	109	8	5.73	0.000122
																		regulation of actin filament-based process (GO:0032970)	406	11	3.53	+	3.12	0.00102	0.0437																				Response to other organism (GO:0051707)	1418	36	1.98	0.000123
																		neuron differentiation (GO:0030182)	1050	20	9.13	+	2.19	0.00102	0.0437																				Response to external biotic stimulus (GO:0043207)	1420	36	1.98	0.000124
																		osteoblast differentiation (GO:0001649)	127	6	1.1	+	5.44	0.00105	0.0444																				Negative regulation of protein maturation (GO:1903318)	34	5	11.48	0.000126
																		nephron development (GO:0072006)	127	6	1.1	+	5.44	0.00105	0.0445																				Negative regulation of protein processing (GO:0010955)	34	5	11.48	0.000126
																		positive regulation of epithelial to mesenchymal transition (GO:0010718)	48	4	0.42	+	9.59	0.00105	0.0446																				Peptide hormone processing (GO:0016486)	34	5	11.48	0.000126
																		regulation of phospholipase C activity (GO:1900274)	48	4	0.42	+	9.59	0.00105	0.0447																				Muscle cell differentiation (GO:0042692)	248	12	3.78	0.000126
																		negative regulation of cell projection organization (GO:0031345)	176	7	1.53	+	4.58	0.00107	0.0452																				Defense response (GO:0006952)	1424	36	1.97	0.000128
																		carbohydrate derivative biosynthetic process (GO:1901137)	611	14	5.31	+	2.64	0.00107	0.0452																				Interspecies interaction between organisms (GO:0044419)	2073	47	1.77	0.000129
																		cellular response to vitamin (GO:0071295)	21	3	0.18	+	16.44	0.00111	0.0469																				Regulation of kidney development (GO:0090183)	56	6	8.37	0.000131
																		platelet degranulation (GO:0002576)	129	6	1.12	+	5.35	0.00113	0.0474																				Regulation of establishment of protein localization (GO:0070201)	786	24	2.38	0.000132
																		negative regulation of metabolic process (GO:0009892)	3149	44	27.37	+	1.61	0.00117	0.049																				Ion homeostasis (GO:0050801)	789	24	2.38	0.000137
																		positive regulation of smooth muscle cell proliferation (GO:0048661)	87	5	0.76	+	6.61	0.00121	0.0494																				Negative regulation of gene expression (GO:0010629)	1966	45	1.79	0.000141
																		positive regulation of fibroblast proliferation (GO:0048146)	50	4	0.43	+	9.2	0.0012	0.0495																				Signaling receptor ligand precursor processing (GO:0140448)	35	5	11.16	0.000143
																		endocrine process (GO:0050886)	50	4	0.43	+	9.2	0.0012	0.0496																				Regulation of transforming growth factor beta production (GO:0071634)	35	5	11.16	0.000143
																		response to biotic stimulus (GO:0009607)	1464	25	12.72	+	1.96	0.00119	0.0497																				Regulation of binding (GO:0051098)	375	15	3.12	0.000143
																		gliogenesis (GO:0042063)	233	8	2.03	+	3.95	0.00119	0.0497																				Regulation of epithelial cell apoptotic process (GO:1904035)	83	7	6.59	0.000146
																		response to organic cyclic compound (GO:0014070)	889	18	7.73	+	2.33	0.0012	0.0498																				Regulation of gene expression (GO:0010468)	4873	90	1.44	0.000147
																		endoderm formation (GO:0001706)	50	4	0.43	+	9.2	0.0012	0.0498																				Regulation of interleukin-6 production (GO:0032675)	145	9	4.85	0.000155
																		Unclassified (UNCLASSIFIED)	2738	10	23.8	-	0.42	0.00122	0.0498																				Hormone transport (GO:0009914)	84	7	6.51	0.000156
																		face development (GO:0060324)	50	4	0.43	+	9.2	0.0012	0.0499																				Negative regulation of plasminogen activation (GO:0010757)	6	3	39.05	0.000159
																		biological_process (GO:0008150)	17857	169	155.2	+	1.09	0.00122	0.0499																				Positive regulation of apoptotic signaling pathway (GO:2001235)	180	10	4.34	0.00016
																																													Platelet-derived growth factor receptor signaling pathway (GO:0048008)	36	5	10.85	0.000161
																																													Positive regulation of epithelial cell migration (GO:0010634)	146	9	4.81	0.000163
																																													Regulation of proteolysis (GO:0030162)	742	23	2.42	0.000167
																																													Negative regulation of molecular function (GO:0044092)	1178	31	2.06	0.000168
																																													Regulation of cell growth (GO:0001558)	425	16	2.94	0.000169
																																													Negative regulation of cysteine-type endopeptidase activity involved in apoptotic process (GO:0043154)	87	7	6.28	0.000192
																																													Positive regulation of establishment of protein localization (GO:1904951)	477	17	2.78	0.000199
																																													RNA processing (GO:0006396)	919	1	0.08	0.0002
																																													Regulation of cell migration involved in sprouting angiogenesis (GO:0090049)	38	5	10.28	0.000202
																																													Positive regulation of interleukin-6 secretion (GO:2000778)	38	5	10.28	0.000202
																																													Negative regulation of cell-matrix adhesion (GO:0001953)	38	5	10.28	0.000202
																																													Negative regulation of phosphate metabolic process (GO:0045936)	572	19	2.59	0.000202
																																													Cellular calcium ion homeostasis (GO:0006874)	433	16	2.89	0.000207
																																													Regulation of protein transport (GO:0051223)	761	23	2.36	0.000207
																																													Cellular response to external stimulus (GO:0071496)	345	14	3.17	0.000207
																																													Negative regulation of phosphorus metabolic process (GO:0010563)	573	19	2.59	0.000206
																																													Negative regulation of catalytic activity (GO:0043086)	819	24	2.29	0.000208
																																													Negative regulation of ion transport (GO:0043271)	152	9	4.62	0.000216
																																													Fibrinolysis (GO:0042730)	20	4	15.62	0.000217
																																													Positive regulation of receptor signaling pathway via STAT (GO:1904894)	89	7	6.14	0.000218
																																													Negative regulation of cell-substrate adhesion (GO:0010812)	62	6	7.56	0.000219
																																													Developmental process involved in reproduction (GO:0003006)	977	27	2.16	0.000221
																																													Regulation of epithelial cell migration (GO:0010632)	226	11	3.8	0.000228
																																													Regulation of cell-substrate junction assembly (GO:0090109)	63	6	7.44	0.000238
																																													Regulation of focal adhesion assembly (GO:0051893)	63	6	7.44	0.000238
																																													Positive regulation of cell migration involved in sprouting angiogenesis (GO:0090050)	21	4	14.87	0.000256
																																													Epithelial tube morphogenesis (GO:0060562)	311	13	3.26	0.000264
																																													Cellular component disassembly (GO:0022411)	398	15	2.94	0.000266
																																													Calcium ion homeostasis (GO:0055074)	446	16	2.8	0.000284
																																													Regulation of leukocyte chemotaxis (GO:0002688)	125	8	5	0.000295
																																													Maternal process involved in female pregnancy (GO:0060135)	66	6	7.1	0.0003
																																													Mesenchymal-epithelial cell signaling (GO:0060638)	8	3	29.29	0.000306
																																													Embryo implantation (GO:0007566)	42	5	9.3	0.000309
																																													Regulation of transferase activity (GO:0051338)	1031	28	2.12	0.000307
																																													Establishment of localization in cell (GO:0051649)	2374	51	1.68	0.000307
																																													Regulation of phosphatidylinositol 3-kinase signaling (GO:0014066)	126	8	4.96	0.000311
																																													Enzyme linked receptor protein signaling pathway (GO:0007167)	733	22	2.34	0.000314
																																													Negative regulation of cysteine-type endopeptidase activity (GO:2000117)	95	7	5.75	0.000317
																																													Regulation of cell-substrate junction organization (GO:0150116)	67	6	6.99	0.000324
																																													Regulation of peptide transport (GO:0090087)	793	23	2.27	0.000324
																																													Embryonic organ development (GO:0048568)	452	16	2.76	0.000328
																																													Positive regulation of cell-cell adhesion (GO:0022409)	277	12	3.38	0.000333
																																													Positive regulation of stem cell proliferation (GO:2000648)	43	5	9.08	0.000342
																																													Positive regulation of phospholipase C activity (GO:0010863)	43	5	9.08	0.000342
																																													Cellular response to unfolded protein (GO:0034620)	128	8	4.88	0.000343
																																													Chemotaxis (GO:0006935)	549	18	2.56	0.000345
																																													Regulation of protein processing (GO:0070613)	68	6	6.89	0.000348
																																													Cellular response to growth factor stimulus (GO:0071363)	502	17	2.64	0.000352
																																													Taxis (GO:0042330)	551	18	2.55	0.000359
																																													Protein processing (GO:0016485)	164	9	4.29	0.000369
																																													Negative regulation of epithelial cell apoptotic process (GO:1904036)	44	5	8.87	0.000377
																																													Positive regulation of leukocyte chemotaxis (GO:0002690)	98	7	5.58	0.000379
																																													Positive regulation of protein secretion (GO:0050714)	281	12	3.33	0.000376
																																													Response to nutrient (GO:0007584)	165	9	4.26	0.000384
																																													Cell chemotaxis (GO:0060326)	202	10	3.87	0.000385
																																													Response to unfolded protein (GO:0006986)	165	9	4.26	0.000384
																																													Negative regulation of cell activation (GO:0050866)	203	10	3.85	0.000399
																																													Regulation of protein maturation (GO:1903317)	70	6	6.69	0.000403
																																													Positive regulation of protein transport (GO:0051222)	461	16	2.71	0.000404
																																													Cellular component organization (GO:0016043)	5658	99	1.37	0.000408
																																													Negative regulation of osteoblast differentiation (GO:0045668)	45	5	8.68	0.000414
																																													Regulation of phospholipase C activity (GO:1900274)	45	5	8.68	0.000414
																																													Branching morphogenesis of an epithelial tube (GO:0048754)	132	8	4.73	0.000417
																																													Negative regulation of hydrolase activity (GO:0051346)	463	16	2.7	0.000423
																																													Cellular response to reactive oxygen species (GO:0034614)	133	8	4.7	0.000438
																																													Regulation of cytosolic calcium ion concentration (GO:0051480)	329	13	3.09	0.000442
																																													Positive regulation of cytokine production (GO:0001819)	465	16	2.69	0.000443
																																													Release of sequestered calcium ion into cytosol (GO:0051209)	46	5	8.49	0.000455
																																													Negative regulation of smooth muscle cell proliferation (GO:0048662)	46	5	8.49	0.000455
																																													Regulation of endothelial cell proliferation (GO:0001936)	134	8	4.66	0.000459
																																													Acute inflammatory response (GO:0002526)	72	6	6.51	0.000463
																																													Regulation of fat cell differentiation (GO:0045598)	134	8	4.66	0.000459
																																													Apoptotic signaling pathway (GO:0097190)	288	12	3.25	0.000465
																																													Positive regulation of secretion by cell (GO:1903532)	421	15	2.78	0.00047
																																													Regulation of T cell activation (GO:0050863)	332	13	3.06	0.00048
																																													Positive regulation of epithelial to mesenchymal transition (GO:0010718)	47	5	8.31	0.000498
																																													Negative regulation of sequestering of calcium ion (GO:0051283)	47	5	8.31	0.000498
																																													Negative regulation of epithelial cell differentiation (GO:0030857)	47	5	8.31	0.000498
																																													Positive regulation of ERK1 and ERK2 cascade (GO:0070374)	209	10	3.74	0.000496
																																													Connective tissue development (GO:0061448)	209	10	3.74	0.000496
																																													Negative regulation of protein serine/threonine kinase activity (GO:0071901)	136	8	4.59	0.000503
																																													Regulation of cytokine secretion (GO:0050707)	210	10	3.72	0.000514
																																													Smooth muscle cell migration (GO:0014909)	10	3	23.43	0.00052
																																													Chondrocyte proliferation (GO:0035988)	10	3	23.43	0.00052
																																													Regulation of nitric oxide mediated signal transduction (GO:0010749)	10	3	23.43	0.00052
																																													Positive regulation of positive chemotaxis (GO:0050927)	26	4	12.01	0.000529
																																													Endoplasmic reticulum unfolded protein response (GO:0030968)	104	7	5.26	0.00053
																																													Positive regulation of hydrolase activity (GO:0051345)	770	22	2.23	0.000527
																																													Regulation of transmembrane receptor protein serine/threonine kinase signaling pathway (GO:0090092)	251	11	3.42	0.000534
																																													Regulation of cell cycle (GO:0051726)	1200	30	1.95	0.000534
																																													Response to amyloid-beta (GO:1904645)	48	5	8.13	0.000544
																																													Cell development (GO:0048468)	1644	38	1.81	0.000545
																																													Negative regulation of growth (GO:0045926)	252	11	3.41	0.000551
																																													Heart development (GO:0007507)	525	17	2.53	0.000575
																																													Inactivation of MAPK activity (GO:0000188)	27	4	11.57	0.000601
																																													Decidualization (GO:0046697)	27	4	11.57	0.000601
																																													Regulation of astrocyte differentiation (GO:0048710)	27	4	11.57	0.000601
																																													Regulation of positive chemotaxis (GO:0050926)	27	4	11.57	0.000601
																																													Blood coagulation (GO:0007596)	297	12	3.16	0.000604
																																													Gonad development (GO:0008406)	215	10	3.63	0.000613
																																													Coagulation (GO:0050817)	299	12	3.13	0.000639
																																													Hormone secretion (GO:0046879)	77	6	6.09	0.000646
																																													Positive regulation of binding (GO:0051099)	178	9	3.95	0.000648
																																													Muscle tissue development (GO:0060537)	301	12	3.11	0.000676
																																													Positive regulation of transcription by RNA polymerase II (GO:0045944)	1259	31	1.92	0.000673
																																													Neurogenesis (GO:0022008)	1686	38	1.76	0.000686
																																													Cardiocyte differentiation (GO:0035051)	109	7	5.02	0.00069
																																													Regulation of lymphocyte activation (GO:0051249)	534	17	2.49	0.00069
																																													Positive chemotaxis (GO:0050918)	51	5	7.66	0.000702
																																													Regulation of animal organ morphogenesis (GO:2000027)	260	11	3.3	0.000706
																																													Hemostasis (GO:0007599)	302	12	3.1	0.000695
																																													Regulation of granulocyte chemotaxis (GO:0071622)	51	5	7.66	0.000702
																																													Regulation of endothelial cell apoptotic process (GO:2000351)	51	5	7.66	0.000702
																																													Vascular process in circulatory system (GO:0003018)	260	11	3.3	0.000706
																																													Regulation of cysteine-type endopeptidase activity involved in apoptotic process (GO:0043281)	219	10	3.57	0.000702
																																													Positive regulation of peptide secretion (GO:0002793)	304	12	3.08	0.000735
																																													Nervous system development (GO:0007399)	2422	50	1.61	0.000737
																																													Response to estradiol (GO:0032355)	145	8	4.31	0.000751
																																													Regulation of morphogenesis of an epithelium (GO:1905330)	182	9	3.86	0.000753
																																													Development of primary sexual characteristics (GO:0045137)	221	10	3.53	0.00075
																																													Response to oxidative stress (GO:0006979)	395	14	2.77	0.000758
																																													Female sex differentiation (GO:0046660)	111	7	4.92	0.000764
																																													Epithelial cell differentiation (GO:0030855)	682	20	2.29	0.000762
																																													Regulation of G protein-coupled receptor signaling pathway (GO:0008277)	146	8	4.28	0.000784
																																													Muscle cell development (GO:0055001)	146	8	4.28	0.000784
																																													Regulation of leukocyte activation (GO:0002694)	620	19	2.39	0.00079
																																													Regulation of metal ion transport (GO:0010959)	397	14	2.75	0.000795
																																													Regulation of plasminogen activation (GO:0010755)	12	3	19.52	0.000812
																																													Positive regulation of astrocyte differentiation (GO:0048711)	12	3	19.52	0.000812
																																													Cellular response to topologically incorrect protein (GO:0035967)	147	8	4.25	0.000817
																																													Odontogenesis of dentin-containing tooth (GO:0042475)	81	6	5.78	0.000829
																																													Response to vitamin D (GO:0033280)	30	4	10.41	0.00086
																																													Negative regulation of endothelial cell apoptotic process (GO:2000352)	30	4	10.41	0.00086
																																													Positive regulation of secretion (GO:0051047)	448	15	2.61	0.000868
																																													Response to topologically incorrect protein (GO:0035966)	186	9	3.78	0.000873
																																													Cardiac muscle cell differentiation (GO:0055007)	82	6	5.71	0.00088
																																													Positive regulation of cellular component organization (GO:0051130)	1213	30	1.93	0.000881
																																													Negative regulation of muscle tissue development (GO:1901862)	54	5	7.23	0.000893
																																													Cellular response to abiotic stimulus (GO:0071214)	311	12	3.01	0.000889
																																													Cellular response to environmental stimulus (GO:0104004)	311	12	3.01	0.000889
																																													Regulation of reactive oxygen species metabolic process (GO:2000377)	187	9	3.76	0.000905
																																													Positive regulation of cellular biosynthetic process (GO:0031328)	2066	44	1.66	0.000918
																																													Regulation of fibroblast proliferation (GO:0048145)	83	6	5.65	0.000934
																																													Oncogene-induced cell senescence (GO:0090402)	2	2	78.09	0.00094
																																													Sex differentiation (GO:0007548)	270	11	3.18	0.000948
																																													Response to peptide hormone (GO:0043434)	405	14	2.7	0.000956
																																													Hyaluronan metabolic process (GO:0030212)	31	4	10.08	0.000961
																																													Replicative senescence (GO:0090399)	13	3	18.02	0.000991
																																													Positive regulation of RNA biosynthetic process (GO:1902680)	1695	38	1.75	0.000993
																																													Positive regulation of T cell differentiation in thymus (GO:0033089)	13	3	18.02	0.000991
																																													Positive regulation of nucleic acid-templated transcription (GO:1903508)	1694	38	1.75	0.00099
																																													Regulation of tumor necrosis factor production (GO:0032680)	152	8	4.11	0.001
																																													Regulation of transcription regulatory region DNA binding (GO:2000677)	56	5	6.97	0.00104
																																													Positive regulation of blood vessel endothelial cell migration (GO:0043536)	56	5	6.97	0.00104
																																													Regulation of ion transport (GO:0043269)	705	20	2.22	0.00105
																																													Regulation of defense response (GO:0031347)	863	23	2.08	0.00105
																																													Protein maturation (GO:0051604)	232	10	3.37	0.00107
																																													Positive regulation of leukocyte cell-cell adhesion (GO:1903039)	233	10	3.35	0.0011
																																													Positive regulation of receptor signaling pathway via JAK-STAT (GO:0046427)	86	6	5.45	0.00111
																																													Positive regulation of transcription, DNA-templated (GO:0045893)	1600	36	1.76	0.00112
																																													Regulation of morphogenesis of a branching structure (GO:0060688)	57	5	6.85	0.00112
																																													Regulation of tumor necrosis factor superfamily cytokine production (GO:1903555)	155	8	4.03	0.00113
																																													Cellular localization (GO:0051641)	2996	58	1.51	0.00116
																																													Cell-cell adhesion (GO:0098609)	511	16	2.45	0.00117
																																													Ureteric bud development (GO:0001657)	87	6	5.39	0.00117
																																													Sequestering of extracellular ligand from receptor (GO:0035581)	14	3	16.73	0.00119
																																													Regulation of type B pancreatic cell proliferation (GO:0061469)	14	3	16.73	0.00119
																																													Regulation of neuroinflammatory response (GO:0150077)	33	4	9.47	0.00119
																																													Sprouting angiogenesis (GO:0002040)	58	5	6.73	0.0012
																																													Placenta development (GO:0001890)	157	8	3.98	0.00122
																																													Response to vitamin (GO:0033273)	88	6	5.32	0.00124
																																													Mesonephric epithelium development (GO:0072163)	88	6	5.32	0.00124
																																													Negative regulation of intracellular signal transduction (GO:1902532)	514	16	2.43	0.00124
																																													Mesonephric tubule development (GO:0072164)	88	6	5.32	0.00124
																																													Response to reactive oxygen species (GO:0000302)	196	9	3.59	0.00124
																																													Cellular response to nitrogen compound (GO:1901699)	662	19	2.24	0.00128
																																													Positive regulation of phospholipase activity (GO:0010518)	59	5	6.62	0.00129
																																													Artery development (GO:0060840)	89	6	5.26	0.00131
																																													Cellular zinc ion homeostasis (GO:0006882)	34	4	9.19	0.00132
																																													Cellular response to alcohol (GO:0097306)	89	6	5.26	0.00131
																																													Positive regulation of RNA metabolic process (GO:0051254)	1784	39	1.71	0.00131
																																													Epithelial cell proliferation (GO:0050673)	89	6	5.26	0.00131
																																													Regulation of ossification (GO:0030278)	198	9	3.55	0.00133
																																													Regulation of cell junction assembly (GO:1901888)	199	9	3.53	0.00137
																																													Positive regulation of DNA binding (GO:0043388)	60	5	6.51	0.00138
																																													Regulation of epithelial to mesenchymal transition (GO:0010717)	90	6	5.21	0.00138
																																													Regulation of lipid metabolic process (GO:0019216)	422	14	2.59	0.00139
																																													Regulation of gliogenesis (GO:0014013)	124	7	4.41	0.00141
																																													Mitotic cell cycle phase transition (GO:0044772)	284	11	3.02	0.0014
																																													Positive regulation of calcium ion transport (GO:0051928)	124	7	4.41	0.00141
																																													Regulation of RNA polymerase II regulatory region sequence-specific DNA binding (GO:1903025)	15	3	15.62	0.00142
																																													Positive regulation of biosynthetic process (GO:0009891)	2099	44	1.64	0.00142
																																													Regulation of hemopoiesis (GO:1903706)	472	15	2.48	0.00143
																																													Positive regulation of vascular associated smooth muscle cell proliferation (GO:1904707)	35	4	8.92	0.00145
																																													Maintenance of blood-brain barrier (GO:0035633)	35	4	8.92	0.00145
																																													Roof of mouth development (GO:0060021)	91	6	5.15	0.00146
																																													Myeloid leukocyte migration (GO:0097529)	125	7	4.37	0.00147
																																													Cellular response to oxidative stress (GO:0034599)	243	10	3.21	0.00149
																																													Establishment of localization (GO:0051234)	4698	83	1.38	0.00149
																																													Regulation of cysteine-type endopeptidase activity (GO:2000116)	243	10	3.21	0.00149
																																													Manganese ion homeostasis (GO:0055071)	3	2	52.06	0.00155
																																													Female gonad development (GO:0008585)	92	6	5.09	0.00154
																																													Regulation of smooth muscle cell-matrix adhesion (GO:2000097)	3	2	52.06	0.00155
																																													Senescence-associated heterochromatin focus assembly (GO:0035986)	3	2	52.06	0.00155
																																													Mesonephros development (GO:0001823)	92	6	5.09	0.00154
																																													Regeneration (GO:0031099)	163	8	3.83	0.00154
																																													Metanephric glomerulus morphogenesis (GO:0072275)	3	2	52.06	0.00155
																																													Positive regulation of cell-substrate adhesion (GO:0010811)	126	7	4.34	0.00154
																																													Metanephric glomerular capillary formation (GO:0072277)	3	2	52.06	0.00155
																																													Metanephric glomerulus vasculature morphogenesis (GO:0072276)	3	2	52.06	0.00155
																																													Regulation of platelet activation (GO:0010543)	36	4	8.68	0.0016
																																													Regulation of blood vessel endothelial cell proliferation involved in sprouting angiogenesis (GO:1903587)	16	3	14.64	0.00167
																																													Regulation of extracellular matrix disassembly (GO:0010715)	16	3	14.64	0.00167
																																													Hyaluronan catabolic process (GO:0030214)	16	3	14.64	0.00167
																																													Digestive tract development (GO:0048565)	128	7	4.27	0.00167
																																													Extracellular regulation of signal transduction (GO:1900115)	16	3	14.64	0.00167
																																													Extracellular negative regulation of signal transduction (GO:1900116)	16	3	14.64	0.00167
																																													Developmental growth (GO:0048589)	383	13	2.65	0.00168
																																													Calcium ion transmembrane import into cytosol (GO:0097553)	63	5	6.2	0.0017
																																													Positive regulation of endothelial cell proliferation (GO:0001938)	94	6	4.98	0.00171
																																													Cell cycle phase transition (GO:0044770)	292	11	2.94	0.00173
																																													Zinc ion homeostasis (GO:0055069)	37	4	8.44	0.00175
																																													Negative regulation of striated muscle cell differentiation (GO:0051154)	37	4	8.44	0.00175
																																													Regulation of DNA binding (GO:0051101)	129	7	4.24	0.00175
																																													Regulation of collagen biosynthetic process (GO:0032965)	37	4	8.44	0.00175
																																													Aminoglycan metabolic process (GO:0006022)	167	8	3.74	0.00178
																																													Positive regulation of cell activation (GO:0050867)	436	14	2.51	0.00187
																																													Regulation of lipase activity (GO:0060191)	96	6	4.88	0.00189
																																													Kidney epithelium development (GO:0072073)	131	7	4.17	0.0019
																																													ER-nucleus signaling pathway (GO:0006984)	38	4	8.22	0.00192
																																													Maternal placenta development (GO:0001893)	38	4	8.22	0.00192
																																													Growth (GO:0040007)	389	13	2.61	0.00192
																																													Regulation of organic acid transport (GO:0032890)	65	5	6.01	0.00193
																																													Proteolysis (GO:0006508)	1287	30	1.82	0.00194
[truncated: 1 more columns]
