# Supplementary material for: Modelling the impact of decidual senescence on embryo implantation in human endometrial assembloids
Source: eLife. 2021 Sep 6;10:e69603. doi: 10.7554/eLife.69603 (PMC8523170; doi:10.7554/eLife.69603)
Supplement: Figure 3—source data 3. — Population markers were generated in Seurat v3 using FindMarkers on specified comparisons. Supports Figure 3E. [file elife-69603-fig3-data3.xlsx]

## Sheet: Figure 3-Source Data 3
Figure 3-Source Data 3
Supports Figure 3 E
Population markers were generated in Seurat v3 using FindMarkers on specified comparisons.
SS1 - cell cycle																			SS2 - proliferative phase																			SS3 - pre-decidual
(ident.1 = SS1, ident.2 = c(SS2,SS3,SS4,SS5), only.pos=TRUE)																			(ident.1 = SS4, ident.2 = SS2)																			(ident.1 = SS3, ident.2 = SS4, only.pos=TRUE)
						Average expression																			Average expression																			Average expression
Gene Name	p_val	avg_logFC	pct.1	pct.2	p_val_adj	EpS1	EpS2	EpS3	EpS4	EpS5	TP	SS1	SS2	SS3	SS4	SS5			Gene Name	p_val	avg_logFC	pct.1	pct.2	p_val_adj	EpS1	EpS2	EpS3	EpS4	EpS5	TP	SS1	SS2	SS3	SS4	SS5			Gene Name	p_val	avg_logFC	pct.1	pct.2	p_val_adj	EpS1	EpS2	EpS3	EpS4	EpS5	TP
ACAT2	8.51936e-26	0.585158	0.813	0.641	1.70387e-22	2.39263	1.37112	0.526668	0.553781	1.04418	0.39535	1.86374	0.807064	0.269323	0.736135	0.282392			ABCA9	3.94452e-08	-0.406496	0.252	0.43	7.88905e-05	0.0142761	0.0578311	7.77481e-05	-2.58075e-06	-0.00066147	0.00808158	0.0702419	0.503448	0.00906291	0.0012656	0.0618712			AKR1B1	2.87722e-14	0.444992	0.585	0.459	5.75444e-11	0.375637	0.435031	0.0416167	0.433946	0.935652	1.28379
ACSL4	2.94795e-16	0.304048	0.804	0.59	5.8959e-13	2.45604	4.91472	1.84685	6.07149	0.712285	4.21794	1.67118	0.82148	1.0073	0.761336	3.38875			AC027288.3	3.02768e-12	-0.337249	0.346	0.482	6.05536e-09	0.0907057	0.0633639	0.167492	0.0154807	-0.00204113	0.0577383	0.17959	0.715682	0.241823	0.224536	0.18358			AL133453.1	1.69252e-09	0.37046	0.699	0.622	3.38504e-06	1.25133	1.09108	1.24964	3.61228	3.46109	2.40442
ACTA2	5.12653e-06	0.286907	0.684	0.559	0.0102531	0.144744	0.132572	0.0328853	0.0552617	0.0700546	0.0780917	0.868341	0.712104	0.226685	0.297271	0.267204			ACTA2	2.01709e-70	-0.27746	0.4	0.682	4.03417e-67	0.144744	0.132572	0.0328853	0.0552617	0.0700546	0.0780917	0.868341	0.712104	0.226685	0.297271	0.267204			ASRGL1	9.97936e-11	0.265461	0.739	0.638	1.99587e-07	22.2781	29.0508	11.9539	27.6635	11.8438	14.1245
AFDN	2.38261e-07	0.320686	0.608	0.487	0.000476523	4.11243	4.1839	3.03801	3.00082	3.5533	3.22399	0.778229	0.343898	0.324788	0.176609	0.557919			AL139393.3	1.53169e-17	-0.253787	0.47	0.579	3.06339e-14	0.0316343	0.0445361	0.0341813	0.0124589	0.0662283	0.13107	0.133651	0.489175	0.307603	0.155387	0.18312			CA12	1.27283e-13	0.38938	0.736	0.664	2.54566e-10	1.65554	1.47865	1.91829	6.51905	4.4762	4.46052
ALDH1A2	1.06115e-08	0.344871	0.852	0.793	2.1223e-05	0.0463736	0.251483	0.085728	0.0271563	0.0892103	0.299116	3.68918	4.19942	1.48422	1.56594	0.836784			AL162584.1	3.53681e-71	-0.289471	0.452	0.663	7.07363e-68	0.00059676	0.00292881	0.000550971	0.00493469	0.0129427	0.118621	0.0932439	0.481036	0.137221	0.108792	0.053007			CCN4	2.26508e-06	0.331276	0.392	0.249	0.00453017	0.0684095	0.160784	0.00244574	0.0454917	0.0424283	0.524583
ALDH1A3	4.41488e-06	0.465815	0.651	0.549	0.00882977	0.0302018	0.190818	0.50511	0.115901	0.998273	0.715387	1.74256	0.276051	0.669661	1.22718	0.278851			ALDH1A1	2.59214e-11	-0.401517	0.627	0.707	5.18428e-08	1.84531	2.91369	2.04624	0.798267	0.695466	0.705083	1.62341	2.31027	1.00555	1.21558	1.07856			CDKN1C	8.99503e-14	0.591897	0.81	0.759	1.79901e-10	0.130344	0.226325	0.725888	1.35416	1.065	1.03784
ANLN	1.92743e-90	1.89308	0.89	0.499	3.85487e-87	2.29381	0.722391	1.07423	0.0512658	0.113814	0.0775792	6.28917	0.175469	0.0939893	0.0416965	0.0149983			ALDH1A2	1.79557e-62	-0.706223	0.736	0.884	3.59115e-59	0.0463736	0.251483	0.085728	0.0271563	0.0892103	0.299116	3.68918	4.19942	1.48422	1.56594	0.836784			CENPW	6.48809e-15	0.328009	0.695	0.582	1.29762e-11	0.869755	0.484686	0.689442	0.147769	0.232924	0.257036
ANXA1	9.10739e-06	0.289427	0.89	0.842	0.0182148	16.456	11.958	17.7567	3.88284	9.76759	4.54122	4.72891	3.34996	2.79527	3.95913	1.10368			ANTXR1	2.63845e-38	-0.555528	0.915	0.926	5.27689e-35	0.375738	1.19754	0.187175	0.66882	0.217517	1.92667	6.34968	9.03061	4.13871	4.75526	6.76928			CHSY1	1.29198e-05	0.260483	0.947	0.932	0.0258396	0.397947	0.533425	0.190776	0.47553	0.374406	2.44649
APOLD1	1.17936e-17	0.293661	0.579	0.388	2.35872e-14	0.0187391	0.0332427	0.000563771	0.0141347	0.0172954	0.00183802	0.364017	0.0112896	0.0141424	0.0223544	0.0334417			ANTXR2	2.63533e-13	-0.467471	0.801	0.854	5.27067e-10	0.207084	0.533107	0.226242	0.436205	0.299941	0.724779	3.09993	3.97805	1.81382	2.11917	2.84718			COL4A1	5.95951e-07	0.335419	0.94	0.958	0.0011919	0.956279	2.04901	1.7224	0.73599	0.909562	4.17506
ARHGAP11A	9.28773e-56	0.934128	0.785	0.492	1.85755e-52	1.72139	0.333423	0.781136	0.160364	0.0439009	0.210046	1.76998	0.165647	0.0682781	0.030865	0.133058			APOE	3.77508e-37	-0.481334	0.748	0.861	7.55016e-34	0.0586179	0.183172	0.0503518	0.0676021	0.0710907	0.222554	1.46546	2.54541	1.52192	1.19091	1.43515			COL6A3	2.15359e-05	0.318747	0.929	0.954	0.0430718	0.12309	0.626321	0.242433	0.697624	0.340072	3.75177
ARL6IP1	1.97034e-72	1.71506	0.995	0.79	3.94067e-69	6.70438	5.18943	1.89425	2.86471	3.61796	2.13093	17.6666	3.22631	2.0544	1.71415	3.39945			ARHGAP22	1.45582e-81	-0.429663	0.488	0.693	2.91163e-78	0.0531587	0.0413115	0.00577566	0.00606486	0.0405656	0.071039	0.588805	0.68106	0.19708	0.0939135	0.531564			COL7A1	6.50101e-19	0.465711	0.863	0.847	1.3002e-15	0.114311	0.652074	0.128497	0.317547	0.266875	3.71358
ASPM	3.32435e-109	2.09661	0.923	0.43	6.64871e-106	4.43754	1.11838	0.148545	0.145409	0.140046	0.377326	7.66397	0.117538	0.0654336	0.0232356	0.00751371			ARL6IP1	6.2593e-23	-0.44285	0.772	0.864	1.25186e-19	6.70438	5.18943	1.89425	2.86471	3.61796	2.13093	17.6666	3.22631	2.0544	1.71415	3.39945			CRISPLD2	1.12196e-31	0.52373	0.978	0.967	2.24393e-28	0.106778	0.30682	0.237008	0.369479	0.346587	2.61987
ATAD2	3.02345e-59	1.23052	0.852	0.539	6.04689e-56	1.90477	0.65853	0.628002	0.426068	0.5447	0.45664	3.63166	0.413091	0.267367	0.332256	0.690259			ASRGL1	9.71246e-11	-0.547406	0.638	0.719	1.94249e-07	22.2781	29.0508	11.9539	27.6635	11.8438	14.1245	1.23985	2.16518	1.38754	0.830893	0.959059			DDIT3	7.97665e-08	0.267911	0.682	0.583	0.000159533	0.790894	1.01557	0.937384	1.09438	0.657593	0.902551
AURKA	1.57502e-83	1.39874	0.842	0.421	3.15004e-80	1.45686	0.34715	0.0857584	0.0673658	0.0993043	0.120861	3.28374	0.0631126	0.0657462	0.0512576	0.0135361			BMERB1	4.16421e-79	-1.04787	0.525	0.774	8.32842e-76	0.0652907	0.2411	0.308361	0.0579711	0.0212274	0.191004	1.47651	2.77438	0.405865	0.323617	1.15668			DDIT4	1.81729e-36	0.781541	0.949	0.874	3.63458e-33	2.07294	2.67234	1.59701	4.22204	5.46826	5.88079
AURKB	2.93302e-48	0.4935	0.703	0.378	5.86604e-45	1.02135	0.161156	0.0136858	0.0156048	0.202862	0.0684315	0.665144	0.0421543	0.0074075	0.00353506	0.0015068			BMP2	9.59654e-16	-0.327926	0.47	0.555	1.91931e-12	0.0169333	0.0488732	-0.0005811	0.055058	0.0338348	0.242004	0.16698	0.544763	0.241267	0.112872	2.17815			ENO2	1.20186e-06	0.433739	0.581	0.523	0.00240372	0.617219	0.351864	1.4178	1.47682	0.53239	1.71516
BIRC5	2.96743e-93	1.75598	0.9	0.483	5.93486e-90	2.21671	0.70535	0.146472	0.100168	0.13199	0.0805552	5.50363	0.283267	0.0473724	0.0616202	0.0109566			BOC	9.44226e-106	-0.631482	0.41	0.745	1.88845e-102	0.0983377	0.0685221	0.00441885	0.0492324	0.0847516	0.122947	0.968729	1.22938	0.250109	0.185592	0.0605328			ERO1A	7.00151e-07	0.385741	0.647	0.59	0.0014003	1.2903	1.88267	0.517952	2.96561	3.6362	3.29501
BLM	2.20867e-47	0.364265	0.665	0.308	4.41733e-44	0.752795	0.2968	0.0547146	0.0208777	0.0231559	0.0474418	0.49126	0.111138	0.000572463	8.66523e-05	0.0338716			C12orf75	5.96613e-06	-0.324239	0.522	0.575	0.0119323	3.19545	1.40877	3.16347	2.7166	6.9276	1.98619	1.32099	0.898679	0.365316	0.372892	0.144216			F3	1.33208e-08	0.501198	0.763	0.766	2.66416e-05	1.54883	1.80171	0.324513	2.2342	2.70307	2.9265
BOC	4.8423e-16	0.257425	0.756	0.563	9.6846e-13	0.0983377	0.0685221	0.00441885	0.0492324	0.0847516	0.122947	0.968729	1.22938	0.250109	0.185592	0.0605328			CCDC68	2.26594e-80	-0.720013	0.586	0.777	4.53188e-77	0.367919	0.380301	0.276921	0.161962	0.301765	0.218996	1.04875	1.73629	0.514788	0.331876	0.487924			FTH1	1.3749e-41	0.591825	0.978	0.964	2.74981e-38	12.0372	15.9949	35.4017	30.4364	29.4109	17.4804
BRCA1	4.05188e-65	0.905766	0.804	0.488	8.10376e-62	1.104	0.736536	0.634689	0.0746829	0.0975196	0.167125	1.6607	0.110785	0.0675828	0.0593695	0.00923349			CCDC71L	1.89453e-40	-0.688508	0.507	0.704	3.78907e-37	0.280911	0.254151	0.112708	0.123021	0.153506	0.199691	0.883925	1.79632	0.461416	0.404661	1.13228			FTL	1.00287e-16	0.387683	0.975	0.986	2.00575e-13	2.48903	3.70091	2.94649	5.78284	5.94775	8.41829
BRCA2	5.69094e-53	0.762104	0.766	0.454	1.13819e-49	1.20262	0.269278	0.366736	0.0436504	0.107378	0.160586	1.44307	0.335063	0.0615351	0.0479786	0.0350737			CCN2	1.88196e-36	-0.525678	0.366	0.607	3.76391e-33	1.19025	1.7875	3.95961	0.452435	0.907814	0.573945	0.39714	1.41891	0.581929	0.429949	1.2635			G0S2	8.17522e-31	0.859953	0.787	0.657	1.63504e-27	0.47305	0.538551	0.751605	4.17925	2.37218	5.1042
BRIP1	1.91188e-39	0.578665	0.679	0.378	3.82377e-36	0.469819	0.0900902	0.1973	0.0127345	0.0176744	0.00377534	0.812666	0.0436759	0.00311318	0.00523656	0.0010751			CCN4	2.71002e-32	-0.654519	0.249	0.519	5.42004e-29	0.0684095	0.160784	0.00244574	0.0454917	0.0424283	0.524583	0.624956	1.30676	0.669627	0.198803	1.6906			GDF15	1.40858e-06	0.282078	0.493	0.395	0.00281717	0.556057	0.483541	2.55416	2.35052	4.36648	2.38532
BTG2	1.4956e-24	0.275625	0.837	0.658	2.99119e-21	5.43083	6.34569	3.4503	5.79564	2.9252	4.44373	1.47738	1.29512	0.543666	0.821297	0.777133			CCND1	1.98012e-25	-0.93406	0.515	0.63	3.96024e-22	11.2036	11.8322	2.20482	1.95589	10.0948	2.99433	1.31447	2.34169	0.486128	0.313135	1.63474			GPNMB	1.64226e-11	0.471077	0.846	0.837	3.28451e-08	0.0772086	0.262715	0.144111	0.784964	0.259272	1.6701
BUB1	8.90285e-58	1.19683	0.775	0.38	1.78057e-54	1.65854	0.475856	0.194472	0.0833594	0.0516821	0.0693906	2.46851	0.0987144	0.0373783	0.017082	0.00647244			CD9	1.49227e-10	-0.386191	0.496	0.565	2.98454e-07	9.18701	10.7543	5.85084	9.03483	11.2489	5.27478	0.709295	0.820115	0.588639	0.237024	1.06084			HERPUD1	4.34384e-12	0.339687	0.785	0.67	8.68767e-09	0.563022	1.34998	0.895601	1.26293	0.955675	1.05464
BUB1B	6.90894e-87	0.943495	0.813	0.309	1.38179e-83	0.920511	0.413615	0.295585	0.0504191	0.0543101	0.132914	1.63253	0.07402	0.000246323	0.00536038	0.000175981			CDH13	2.20015e-09	-0.338682	0.508	0.583	4.40031e-06	0.0193615	0.0513067	0.0149599	0.00484774	0.0243279	0.0819374	0.777666	0.784868	0.212139	0.272092	0.158353			IER3	3.8635e-15	0.565681	0.804	0.786	7.727e-12	21.7996	29.2796	18.8055	32.8601	24.0398	15.8846
C12orf75	4.52582e-20	0.421483	0.737	0.54	9.05164e-17	3.19545	1.40877	3.16347	2.7166	6.9276	1.98619	1.32099	0.898679	0.365316	0.372892	0.144216			CDKN2A	1.33373e-21	-0.25167	0.515	0.604	2.66746e-18	0.0676951	0.244753	0.840021	0.0983182	0.355135	0.239954	0.880809	0.452663	0.140261	0.129448	0.226377			ITGB8	3.30765e-09	0.375078	0.876	0.817	6.6153e-06	5.02367	6.41634	3.16979	6.40558	11.7826	9.56309
C21orf58	1.30036e-59	0.336202	0.727	0.377	2.60072e-56	0.464316	0.275394	3.05667	0.0292908	0.084763	0.0743288	0.413338	0.0198704	0.0118392	0.00776645	-0.0591894			CDKN2B	7.78035e-105	-0.760156	0.458	0.775	1.55607e-101	0.062218	0.160704	0.0622303	0.146703	0.738779	0.493965	0.808684	1.6668	0.462853	0.24698	1.10509			KRT19	1.27131e-05	0.398879	0.68	0.655	0.0254262	16.783	20.3517	13.033	22.3728	35.2522	25.9754
CCDC18	5.51116e-45	0.889862	0.746	0.479	1.10223e-41	0.60507	0.347673	1.07471	0.12423	0.0797856	0.161915	1.66472	0.140172	0.0689531	0.0757205	0.0960623			CEMIP	5.15053e-27	-0.686383	0.095	0.427	1.03011e-23	0.168152	0.248028	0.0319448	0.0274001	0.109843	0.599967	0.145226	1.04817	0.271542	0.0310338	3.21816			LONRF2	2.19909e-08	0.333785	0.778	0.711	4.39819e-05	1.49256	2.10086	0.907997	0.561347	0.26305	1.7624
CCDC34	1.95244e-59	1.05521	0.828	0.507	3.90488e-56	1.50541	0.742134	2.25983	0.27718	0.462396	0.286718	2.53843	0.265639	0.250368	0.201304	0.101918			CENPF	1.27458e-15	-0.561015	0.502	0.557	2.54915e-12	13.01	4.68599	4.20623	0.505831	1.15437	1.16743	17.3627	1.09489	0.214593	0.195404	0.104961			LOX	4.86514e-10	0.402847	0.794	0.717	9.73029e-07	0.139756	0.140579	0.109592	0.748219	0.224214	1.34149
CCNA2	2.42436e-77	0.990242	0.818	0.403	4.84873e-74	1.5847	0.362211	0.0103843	0.0254893	0.0405522	0.0318244	1.78718	0.0770968	0.0172205	0.0170348	0.0119653			CERT1	3.61973e-08	-0.332984	0.676	0.737	7.23946e-05	5.46091	5.89273	3.64649	5.77932	3.27798	4.28682	1.25026	1.64108	1.17898	0.893079	1.10191			LTBP1	6.73448e-08	0.466689	0.718	0.663	0.00013469	0.139941	0.336392	0.0822207	0.165254	0.201453	0.444223
CCNB1	5.21352e-93	1.40372	0.895	0.493	1.0427e-89	1.99678	0.96163	0.928119	0.0918709	0.230104	0.114595	3.67991	0.248297	0.156334	0.0665264	0.0588521			CHI3L1	1.17235e-56	-1.20143	0.446	0.712	2.34469e-53	0.139269	0.3684	0.169956	0.284109	0.0267121	0.54107	1.66929	4.01255	1.44313	0.5076	2.06974			MMP14	5.04431e-59	0.756923	0.97	0.961	1.00886e-55	1.08501	2.06954	0.66621	1.53148	1.62693	5.17249
CCNB2	2.72127e-52	0.877654	0.737	0.414	5.44254e-49	0.934849	0.182479	0.137457	0.0341867	0.0384494	0.0516763	1.47942	0.0565744	0.0156043	0.00812745	0.132374			CKAP2	4.17577e-10	-0.297277	0.524	0.598	8.35155e-07	1.80614	0.751811	0.643475	0.399249	0.453766	0.430808	6.01174	0.693894	0.232007	0.258289	0.149212			MMP7	1.34999e-45	0.582262	0.692	0.496	2.69999e-42	69.2563	58.4968	15.689	8.194	53.5743	10.377
CCNE2	4.56494e-06	0.37871	0.254	0.215	0.00912989	0.26376	0.0444829	0.0227974	0.00523918	-2.23355e-05	0.0016187	0.48549	0.0522447	0.00534625	0.00161642	-0.0256255			CLEC2B	1.28953e-18	-0.391982	0.477	0.646	2.57905e-15	-0.000472718	0.0875937	-0.00162859	0.11289	0.0201126	0.333082	2.11988	1.19569	0.460945	0.483661	2.17323			MXRA8	2.0512e-19	0.505282	0.908	0.828	4.10241e-16	0.0776902	0.192004	0.127307	0.155404	0.101832	0.849855
CCNF	1.4632e-25	0.403825	0.66	0.509	2.9264e-22	0.407672	0.110475	0.106302	0.038414	0.131822	0.0419769	0.561763	0.0609415	0.037617	0.0207612	0.124462			CLMP	1.64325e-08	-0.366507	0.899	0.914	3.28651e-05	0.0918142	0.461157	0.227	0.193134	0.114469	1.22082	3.22381	6.30238	4.98782	4.06165	6.43454			NDRG1	1.43075e-39	0.602377	0.904	0.851	2.86149e-36	1.13331	1.87522	3.20813	14.3825	5.90877	7.90068
CCP110	2.10593e-29	0.713047	0.746	0.507	4.21186e-26	0.777525	0.683951	3.46139	0.393713	0.318181	0.557032	1.70046	0.404343	0.282731	0.253843	0.583206			CLSPN	1.64109e-25	-0.272299	0.267	0.477	3.28218e-22	3.30413	0.78591	0.0293064	0.0310595	0.137634	0.183	2.63579	0.372189	0.0280374	0.045096	0.0160984			NDUFA4L2	1.01587e-31	0.295464	0.659	0.504	2.03174e-28	0.00123866	0.000530681	0.00163226	0.0152924	0.0114723	0.0839794
CDC20	1.24043e-75	0.847252	0.794	0.366	2.48087e-72	1.26242	0.3831	0.456081	0.0452148	0.12139	0.076815	1.40485	0.0778455	0.0108979	0.00965545	0.0010471			CLU	1.34719e-14	-0.382716	0.644	0.726	2.69438e-11	1.17983	2.40179	4.44476	2.81614	1.65642	2.05565	1.16157	1.69641	0.742203	0.838967	1.28004			NMB	7.40513e-21	0.384961	0.241	0.4	1.48103e-17	0.0696628	0.0977452	0.129718	0.0548566	0.0558191	0.293973
CDC6	8.974e-10	0.368898	0.526	0.357	1.7948e-06	0.716352	0.119508	0.0138893	0.00983329	0.0742128	0.00927593	0.523904	0.160944	0.0112313	0.0012068	0.00596783			CMTM6	3.60424e-27	-0.458345	0.711	0.825	7.20849e-24	6.97303	8.62264	4.85535	2.40786	3.19971	2.85986	2.24012	2.5481	0.987301	1.24357	0.990433			NUPR1	6.04079e-08	0.372982	0.919	0.894	0.000120816	0.910635	0.613875	4.75207	12.319	2.94208	7.66457
CDCA2	1.51759e-80	0.975362	0.789	0.3	3.03519e-77	1.07492	0.143805	0.00323579	0.00960136	0.0667448	0.0402664	1.78315	0.0836914	0.0643268	0.00868021	0.0210073			CRABP2	8.1984e-266	-2.64654	0.344	0.954	1.63968e-262	0.628897	1.24962	0.531552	0.736018	1.72413	0.915745	10.41	15.6936	0.489122	0.183508	2.00458			PDGFRB	4.20323e-13	0.420936	0.942	0.937	8.40646e-10	0.343977	1.113	0.361527	0.258763	0.12114	1.58827
CDCA3	4.60975e-56	0.975513	0.761	0.482	9.2195e-53	0.502445	0.38583	0.000378814	0.0139126	0.00986443	0.0851089	1.71962	0.0456857	0.00995982	0.0234402	0.00334003			CSTB	1.71094e-15	-0.343464	0.754	0.868	3.42188e-12	3.84944	5.31295	6.04246	5.48467	10.135	6.18366	2.071	3.09577	2.15141	1.90517	5.3085			PDPN	4.67324e-18	0.508293	0.524	0.33	9.34647e-15	0.0293902	0.177447	0.00160553	0.0485882	0.0207799	0.437133
CDCA5	2.07221e-65	0.587114	0.751	0.371	4.14442e-62	0.658027	0.123216	0.107637	0.0123883	0.0451033	0.0166955	0.854429	0.0886401	0.00309341	0.00781655	-0.000769315			CTSB	1.15991e-60	-0.516819	0.986	0.983	2.31982e-57	6.61492	13.6511	3.741	9.03231	9.02166	9.32103	15.4234	23.7013	14.6437	13.7322	15.4769			PHGDH	3.76595e-43	0.317755	0.727	0.562	7.53189e-40	1.903	0.929648	0.388766	0.936582	0.838778	0.76134
CDCA8	4.99401e-67	1.03143	0.751	0.309	9.98801e-64	0.667887	0.165225	0.286992	0.0784823	0.11148	0.0293268	1.85136	0.02899	0.0173688	0.00591164	0.00512565			CTSK	1.28942e-49	-0.77946	0.703	0.854	2.57885e-46	0.14112	0.374657	0.129932	0.14054	0.0700691	0.615635	1.75221	4.25198	1.20743	1.40884	5.23091			PLAU	5.3691e-32	0.505231	0.807	0.637	1.07382e-28	0.211003	0.30973	0.756303	0.391522	3.43659	1.75782
CDK1	4.97321e-80	1.3691	0.837	0.497	9.94643e-77	2.11383	0.595796	0.931542	0.0811799	0.0619591	0.0792586	3.10603	0.0733533	0.0339801	0.0315652	0.011487			CTSL	4.99903e-44	-0.721421	0.899	0.96	9.99806e-41	0.694921	0.948382	1.57633	0.681148	0.901668	1.63982	8.80426	11.0796	5.43324	4.87141	9.93737			PLIN2	1.06858e-07	0.267914	0.871	0.867	0.000213716	0.846059	1.33135	1.65797	4.11258	1.41895	3.95723
CDKN1A	1.59654e-09	0.317142	0.794	0.634	3.19309e-06	0.652986	0.705016	5.70115	1.37705	2.63742	1.87404	1.99299	1.08461	1.28879	0.904858	3.21552			CTTNBP2	1.91261e-10	-0.274374	0.501	0.611	3.82522e-07	0.277697	0.40402	0.167368	0.339189	0.208745	0.383998	1.01792	0.71786	0.365622	0.305656	0.0804122			PMAIP1	2.9121e-10	0.309991	0.62	0.513	5.82419e-07	2.64426	2.11411	3.25706	1.91216	2.80852	1.58596
CDKN2A	2.44537e-30	0.419209	0.761	0.546	4.89073e-27	0.0676951	0.244753	0.840021	0.0983182	0.355135	0.239954	0.880809	0.452663	0.140261	0.129448	0.226377			CXCL12	4.1101e-45	-0.489264	0.378	0.623	8.22019e-42	0.0129426	0.138131	0.0401323	0.0186612	0.00255228	0.0365653	0.433819	1.10676	0.136829	0.291608	0.155551			PSAT1	1.76244e-27	0.274496	0.68	0.559	3.52487e-24	0.834417	0.903507	1.00998	2.72929	1.26397	1.03006
CDKN2C	3.42354e-67	1.14579	0.837	0.445	6.84708e-64	0.268542	0.0777993	0.00223912	0.0445367	-0.00293163	0.081963	2.57969	0.116905	0.147497	0.17293	-0.0455122			CYGB	1.64487e-92	-0.328559	0.351	0.643	3.28975e-89	0.0106517	0.033513	0.10094	0.00457023	0.000806472	0.00440878	0.0983228	0.398891	0.055023	0.00714551	0.276089			PTGIR	8.63381e-09	0.276214	0.632	0.533	1.72676e-05	0.0178352	0.0641023	0.00123217	0.0670792	0.0414157	0.230667
CDKN2D	3.77044e-42	0.395918	0.756	0.479	7.54088e-39	0.375977	0.21903	1.27727	0.364025	0.313905	0.188444	0.854672	0.173262	0.371782	0.216409	0.163131			DCBLD1	1.62066e-25	-0.493074	0.828	0.885	3.24132e-22	0.526297	0.665087	0.407794	0.324901	0.160037	1.16889	4.50152	4.65642	3.2533	2.45464	5.70828			RAB31	9.589e-12	0.389606	0.91	0.886	1.9178e-08	0.384686	0.940189	0.29297	0.196474	0.500165	2.35583
CDKN3	3.77622e-50	1.38905	0.775	0.497	7.55244e-47	1.59199	0.400264	0.0566034	0.0365005	0.0847067	0.0435465	3.37982	0.169145	0.0538173	0.0647157	0.0270509			DDIT3	4.8838e-08	-0.263173	0.583	0.667	9.76761e-05	0.790894	1.01557	0.937384	1.09438	0.657593	0.902551	0.951548	0.903374	0.912413	0.46295	1.35399			SCGB1D2	2.21561e-11	0.417398	0.871	0.81	4.43121e-08	5.78385	15.7879	14.6411	80.8988	11.3914	32.1759
CENPA	8.94802e-45	0.443303	0.703	0.415	1.7896e-41	0.425427	0.101557	0.0333488	0.00566668	0.00482247	0.0214377	0.588289	0.0563159	0.000693699	0.00555194	0.00135258			DNMT1	2.60008e-10	-0.274943	0.573	0.686	5.20015e-07	3.91577	2.56087	1.71369	1.17923	1.1173	1.23784	2.89616	1.11581	0.68419	0.607199	0.215798			SDC4	2.43079e-07	0.400329	0.649	0.58	0.000486158	1.54852	1.56292	1.17816	1.97419	2.94974	1.8729
CENPE	5.9918e-89	1.9432	0.895	0.387	1.19836e-85	3.82427	1.10301	0.49619	0.326304	0.160017	0.406809	7.38865	0.339521	0.158088	0.144477	-0.0189948			DRAM1	2.74419e-22	-0.436264	0.609	0.724	5.48838e-19	0.178734	0.383495	0.627264	0.390938	0.722409	0.573058	1.42771	1.79211	0.714374	0.804949	1.38011			SERPINA5	6.26207e-13	0.268305	0.629	0.55	1.25241e-09	4.41429	7.29031	2.53847	9.30042	1.87698	4.84992
CENPF	1.1456e-93	2.52177	0.923	0.509	2.29119e-90	13.01	4.68599	4.20623	0.505831	1.15437	1.16743	17.3627	1.09489	0.214593	0.195404	0.104961			DUSP6	1.32827e-148	-1.33618	0.502	0.828	2.65654e-145	2.10141	2.71119	1.19572	1.08349	0.660416	0.661519	2.17272	3.4772	0.457005	0.176824	2.39808			SLC7A11	1.84804e-27	0.283946	0.715	0.581	3.69607e-24	0.740703	0.797629	0.269816	0.380378	2.12979	1.00346
CENPK	1.35289e-73	0.936329	0.833	0.509	2.70577e-70	0.797726	0.315241	0.580093	0.0354189	0.0632042	0.0220663	1.69802	0.125545	0.0290589	0.022094	0.059608			EDNRA	5.44979e-30	-0.326289	0.564	0.702	1.08996e-26	0.0334192	0.0456665	0.00269911	0.0105295	0.011011	0.193865	0.666238	0.923072	0.68637	0.387682	1.47044			STC1	1.30825e-79	1.29534	0.842	0.627	2.61649e-76	3.08595	9.76929	2.66624	4.70811	1.5881	9.01986
CENPM	1.91559e-71	0.532732	0.785	0.428	3.83118e-68	0.708359	0.189675	0.697548	0.135535	0.136786	0.0800885	0.742413	0.0520804	0.0065059	0.00662679	0.0561354			EMP1	8.42972e-56	-0.825318	0.893	0.949	1.68594e-52	2.93358	2.85213	1.26522	0.700802	3.99516	2.20177	7.96323	9.82017	4.40701	3.74027	6.6069			STC2	3.52005e-13	0.638168	0.598	0.515	7.0401e-10	1.83688	1.64233	1.23812	4.63447	3.84271	3.38943
CENPP	1.29858e-35	0.362769	0.665	0.395	2.59716e-32	0.119965	0.0628396	0.00191579	0.000506577	0.034237	0.042414	0.467063	0.0419633	0.0138332	0.010252	0.000526295			ENC1	1.64656e-72	-0.64575	0.47	0.669	3.29312e-69	0.287133	0.264531	0.372435	0.100987	0.278395	0.10699	0.873305	1.01344	0.0924802	0.0555817	0.640897			TCIM	1.47137e-07	0.251488	0.611	0.523	0.000294274	3.57706	4.64189	2.60539	7.86215	3.81642	4.23462
CENPU	5.27414e-83	1.51203	0.871	0.469	1.05483e-79	2.44936	0.597253	1.42465	0.0824108	0.100228	0.140001	3.90376	0.155783	0.0176085	0.076826	0.0319984			ENG	1.7479e-27	-0.376137	0.715	0.833	3.49579e-24	0.0570111	0.169105	0.115812	0.0684394	0.0243507	0.292123	0.999806	2.05196	1.02922	1.09519	0.365537			TGFBI	7.17706e-07	0.348763	0.971	0.972	0.00143541	0.221955	0.492086	0.454799	0.809693	0.829826	3.31771
CENPW	1.80554e-64	0.962808	0.928	0.635	3.61108e-61	0.869755	0.484686	0.689442	0.147769	0.232924	0.257036	3.58715	0.222211	1.32121	0.672098	1.11479			EPCAM	6.78076e-07	-0.374197	0.605	0.653	0.00135615	12.691	14.2262	14.9061	15.1406	18.3803	7.30858	0.855041	1.11805	0.85476	0.456882	0.904084			THBS2	1.56676e-06	0.389842	0.489	0.423	0.00313351	0.0410016	0.140451	-0.0175376	0.0251281	0.134765	0.633701
CEP152	6.55573e-31	0.509733	0.722	0.471	1.31115e-27	0.685172	0.365657	1.74807	0.188828	0.213337	0.463931	1.03154	0.170998	0.219493	0.190147	0.804221			ETV1	6.96317e-49	-0.44449	0.429	0.605	1.39263e-45	0.122317	0.150772	0.00500539	0.00297597	0.04078	0.0231707	0.372145	0.607694	0.160699	0.0307748	0.0776787			TNFAIP6	1.35386e-10	0.325368	0.804	0.722	2.70771e-07	0.0917588	0.0269282	0.143718	0.0747978	0.0886114	0.419699
CEP295	3.30918e-28	0.412688	0.761	0.515	6.61835e-25	1.33852	0.810917	0.695156	0.452821	0.38212	0.744081	1.0528	0.423351	0.374113	0.248003	0.65618			F3	1.90837e-71	-1.03523	0.766	0.908	3.81675e-68	1.54883	1.80171	0.324513	2.2342	2.70307	2.9265	4.81335	7.46036	3.9598	2.00467	4.15025			TWIST1	2.2699e-10	0.261132	0.556	0.442	4.53979e-07	0.00873135	0.0295957	-4.69335e-05	0.0317045	-0.00220319	0.0543241
CEP55	3.03371e-97	1.62803	0.885	0.415	6.06741e-94	3.46545	0.924038	0.070218	0.152817	0.219533	0.205268	4.62416	0.218444	0.0412191	0.0620043	0.0665265			FAM43A	3.48015e-37	-0.308235	0.445	0.592	6.96031e-34	0.063996	0.136063	0.130459	0.068418	0.0517709	0.323109	0.131493	0.517549	0.331994	0.115008	1.1394			VEGFA	2.24906e-28	0.593791	0.948	0.925	4.49811e-25	1.23672	1.1175	1.4051	5.94153	2.92897	4.91913
CEP70	2.21776e-12	0.429225	0.694	0.56	4.43552e-09	2.30742	1.6242	6.18462	2.96017	1.43507	1.91832	0.998593	0.243911	0.35952	0.306251	0.256053			FAP	1.19134e-08	-0.385459	0.577	0.659	2.38268e-05	0.0657878	0.0411848	0.0416184	0.0847217	0.071463	0.341465	1.80158	1.89941	0.734803	0.971998	0.58135
CEP78	6.33919e-23	0.35182	0.689	0.497	1.26784e-19	1.0119	1.1164	2.32998	0.329921	0.294223	0.648688	0.705148	0.384681	0.104533	0.127407	0.11885			FDPS	2.64679e-11	-0.300012	0.792	0.853	5.29359e-08	7.74731	6.88513	2.62189	2.48353	3.44143	2.14915	2.59801	2.8839	1.47581	1.87723	1.36434
CHAF1A	2.66469e-36	0.651609	0.703	0.448	5.32939e-33	1.68698	0.437522	0.349717	0.174488	0.292993	0.277454	1.0973	0.175586	0.0566252	0.04967	0.105811			FGFBP1	2.61655e-12	-0.276969	0.454	0.508	5.2331e-09	3.03697	3.90741	1.32879	1.10241	5.30191	1.11705	0.269553	0.369947	0.13006	0.0385265	0.219767
CHEK1	1.37239e-33	0.432709	0.761	0.503	2.74478e-30	1.51844	0.317942	0.0437201	0.0595734	0.117327	0.04815	0.967697	0.275071	0.225616	0.352263	0.0538942			FOSB	4.91779e-20	-0.441556	0.9	0.919	9.83558e-17	7.82902	14.0078	8.3094	6.54382	5.63475	8.02214	4.55797	6.84742	5.22098	4.04616	11.4447
CIP2A	5.37347e-52	1.03755	0.756	0.409	1.07469e-48	0.773782	0.441213	0.91528	0.100104	0.1158	0.135365	1.92689	0.0674926	0.0267827	0.0219893	0.0121628			FRMD4A	1.24003e-33	-0.358155	0.495	0.61	2.48006e-30	0.18407	0.205566	0.0392616	0.261863	0.0648935	0.303196	0.243756	0.551274	0.149793	0.0842856	0.470823
CKAP2	7.74272e-67	1.62561	0.876	0.564	1.54854e-63	1.80614	0.751811	0.643475	0.399249	0.453766	0.430808	6.01174	0.693894	0.232007	0.258289	0.149212			FRMD6	7.70286e-11	-0.624493	0.479	0.558	1.54057e-07	0.104162	0.160472	-0.00104082	0.0197564	0.0713124	0.0849846	0.758332	1.36154	0.410298	0.264681	1.04085
CKAP2L	1.60708e-74	1.72753	0.837	0.383	3.21416e-71	1.20524	0.276288	0.347626	0.0407822	0.037616	0.169649	5.03619	0.0950429	0.0436634	0.0643172	0.184619			GADD45G	1.24557e-24	-0.268352	0.57	0.685	2.49113e-21	0.126789	0.124174	0.171283	0.156777	0.029834	0.330766	0.328144	1.00301	0.483898	0.531582	0.3568
CKS1B	1.15165e-46	0.713061	0.761	0.514	2.30329e-43	1.02727	0.27023	0.218551	0.147891	0.262111	0.133352	1.26682	0.179015	0.0964907	0.0672753	0.0756386			GEM	9.59264e-42	-0.607596	0.492	0.654	1.91853e-38	0.0236951	0.097047	0.046079	0.0218743	0.0167504	0.249818	0.650032	1.11635	0.283098	0.152687	1.18986
CKS2	3.06959e-68	1.19396	0.885	0.534	6.13918e-65	3.68256	1.18541	1.18234	0.372121	0.481158	0.312865	3.51865	0.529877	0.280209	0.293908	0.446379			GGT5	7.602e-25	-0.517795	0.357	0.539	1.5204e-21	0.000336622	0.107412	0.0402552	0.0222621	0.00392312	0.134203	0.742574	0.88235	0.46251	0.121566	2.08333
CLDN10	1.91026e-31	0.284654	0.737	0.489	3.82052e-28	1.52049	3.61564	1.78419	1.98559	2.94553	1.22797	0.647764	0.405621	0.179568	0.16559	0.0665194			GJA1	3.81476e-25	-0.370606	0.896	0.902	7.62953e-22	0.374008	0.85101	0.275408	0.410321	0.438683	1.14121	3.22249	7.01755	6.08244	4.53464	9.29746
CLEC2B	1.59085e-17	0.566362	0.722	0.513	3.1817e-14	-0.000472718	0.0875937	-0.00162859	0.11289	0.0201126	0.333082	2.11988	1.19569	0.460945	0.483661	2.17323			GJB2	4.55628e-56	-0.488884	0.519	0.662	9.11256e-53	0.351193	0.443977	0.133824	1.09033	0.98201	0.867316	0.495934	0.879229	0.242744	0.15255	0.466343
CLSPN	6.25428e-17	1.16022	0.617	0.396	1.25086e-13	3.30413	0.78591	0.0293064	0.0310595	0.137634	0.183	2.63579	0.372189	0.0280374	0.045096	0.0160984			GLUL	6.56957e-21	-0.409959	0.884	0.927	1.31391e-17	1.20277	2.18449	5.00126	2.11306	1.88205	2.04483	6.37813	7.55357	3.91298	4.67682	1.89522
CNTRL	7.57964e-48	0.697	0.789	0.536	1.51593e-44	0.605093	0.37273	2.36529	0.163288	0.06119	0.189617	1.32269	0.139286	0.175615	0.162517	0.106165			GMNN	4.12123e-14	-0.42543	0.495	0.615	8.24246e-11	4.70884	3.09571	0.945736	0.911547	0.514653	0.562797	3.41	0.965342	0.344585	0.284329	0.671826
CRABP2	8.99981e-19	0.619172	0.833	0.604	1.79996e-15	0.628897	1.24962	0.531552	0.736018	1.72413	0.915745	10.41	15.6936	0.489122	0.183508	2.00458			GNAI1	1.16495e-10	-0.291204	0.67	0.777	2.3299e-07	0.919362	0.464769	0.268256	0.74298	1.32122	0.651578	1.44259	1.72076	1.72518	1.03339	2.97818
CSRP2	2.85211e-26	0.327736	0.656	0.372	5.70423e-23	0.247547	0.446146	0.755918	0.277212	0.0757954	0.258732	0.655674	0.245646	0.201728	0.0653418	0.753008			GRAMD2B	1.81526e-80	-0.832296	0.471	0.771	3.63052e-77	1.13608	2.06452	1.10292	1.31332	3.10536	1.69638	1.24234	2.39281	0.639379	0.47604	1.42986
CYB5B	8.84553e-10	0.346247	0.785	0.652	1.76911e-06	3.84684	3.7572	2.84908	6.89592	2.94047	2.64159	1.8628	1.25674	0.934614	0.94943	0.614457			GREB1	1.7961e-45	-0.433105	0.396	0.594	3.5922e-42	0.290659	0.544986	0.380293	0.12624	0.074714	0.152014	0.167127	0.625552	0.0715045	0.0541582	0.100464
DCBLD2	1.58183e-06	0.371689	0.876	0.782	0.00316365	3.20559	2.72059	1.34331	0.684137	2.74699	1.22096	3.14993	2.35052	1.62639	1.70515	1.28462			GUCY1A2	2.04756e-59	-0.432307	0.436	0.638	4.09511e-56	-0.000381237	0.0766762	0.000491029	0.00135976	0.0366284	0.19567	0.415132	0.693787	0.200456	0.099285	0.493814
DEPDC1	1.44714e-109	1.3889	0.847	0.244	2.89427e-106	1.03121	0.250651	0.416337	0.0228137	0.0358032	0.0565309	3.17431	0.0779256	0.0505981	0.00192786	0.0153343			H2AZ1	8.51679e-43	-0.630933	0.621	0.809	1.70336e-39	9.57587	4.8254	2.46589	2.18033	2.35541	2.18401	10.8293	2.37969	1.15357	0.798317	3.32059
DIAPH3	2.83015e-105	1.42388	0.88	0.299	5.6603e-102	1.5048	0.499997	0.0236827	0.0822279	0.282592	0.131369	3.40661	0.153342	0.0173721	0.0203602	0.0325575			H4C3	2.84006e-34	-0.459984	0.592	0.748	5.68011e-31	11.728	4.01731	1.50787	3.44637	2.2516	2.40548	6.32541	1.39656	0.740603	0.512936	0.991708
DLGAP5	9.87499e-116	1.95101	0.923	0.378	1.975e-112	3.2584	0.985143	0.519832	0.0525724	0.11779	0.238282	6.51217	0.176045	0.0126328	0.0276898	0.00157623			HGF	3.13397e-16	-0.291239	0.454	0.515	6.26795e-13	0.00555172	-0.00925854	0.00496096	0.00614887	0.0119497	0.0792987	0.638229	0.387301	0.0730681	0.0367812	1.41786
DMKN	3.29751e-07	0.269118	0.536	0.387	0.000659502	4.00402	4.42407	3.59265	1.40631	1.61546	1.20716	0.59927	0.32445	0.183243	0.154776	0.292924			HMGA1	6.76531e-61	-0.834968	0.49	0.676	1.35306e-57	6.52863	5.5574	1.04829	1.29671	3.54307	1.72675	1.31863	1.59494	0.292716	0.125914	1.88378
DNMT1	1.42889e-12	0.788747	0.689	0.594	2.85779e-09	3.91577	2.56087	1.71369	1.17923	1.1173	1.23784	2.89616	1.11581	0.68419	0.607199	0.215798			HPCAL1	1.65405e-57	-0.662292	0.658	0.828	3.30811e-54	0.277716	0.279877	0.18772	0.148702	0.304655	0.683032	1.37041	2.29753	0.86925	0.700433	0.884092
DTL	8.0915e-26	0.33991	0.641	0.448	1.6183e-22	0.644768	0.136705	0.0497143	0.000883192	0.0325335	0.00294444	0.442963	0.0683826	0.0023423	0.0155671	0.000461362			HSD11B1	4.1225e-09	-0.401287	0.724	0.814	8.245e-06	0.0760389	0.355858	0.111853	0.152781	0.124657	0.855305	6.75804	5.96546	2.99797	3.66308	2.68017
DUSP6	1.02511e-06	0.288013	0.766	0.662	0.00205022	2.10141	2.71119	1.19572	1.08349	0.660416	0.661519	2.17272	3.4772	0.457005	0.176824	2.39808			HSP90AA1	6.73224e-25	-0.311103	0.988	0.984	1.34645e-21	31.7322	26.9734	58.2078	21.7228	22.7239	33.7917	25.7384	17.8211	16.417	12.789	13.0177
E2F8	5.58831e-08	0.283227	0.512	0.365	0.000111766	0.886903	0.131753	0.108836	0.0274308	0.0650367	0.0491971	0.368535	0.0821252	0.0137907	0.00297528	0.00923342			HSPA2	7.14682e-23	-0.518503	0.782	0.834	1.42936e-19	1.71744	1.86277	0.889145	1.05472	0.602313	0.905493	1.86618	3.57	1.79828	1.72103	2.72886
EBP	1.56855e-11	0.301624	0.727	0.591	3.1371e-08	2.55258	2.66557	0.645669	1.27832	1.59532	1.45895	0.987871	0.660328	0.334976	0.449561	0.239234			HSPH1	1.36958e-06	-0.406698	0.665	0.723	0.00273916	4.38819	4.12426	13.2402	1.95462	2.77549	2.72027	2.63414	2.16854	0.747409	1.10976	0.982985
ECT2	2.20143e-16	0.873512	0.627	0.458	4.40286e-13	2.29803	0.770524	1.45517	0.612752	0.551768	0.586539	1.80802	0.28643	0.151836	0.0898662	0.153743			IER3	3.64108e-116	-1.33464	0.786	0.952	7.28215e-113	21.7996	29.2796	18.8055	32.8601	24.0398	15.8846	5.69751	12.6001	5.30357	2.58026	15.5356
ELOVL6	2.08063e-07	0.300417	0.665	0.617	0.000416126	1.23209	1.38729	0.56795	0.225561	0.907221	0.511649	1.10232	0.812625	0.289753	0.624169	0.0979818			IFIT2	2.0594e-11	-0.379156	0.355	0.269	4.1188e-08	0.0981322	0.150716	0.168922	0.0820431	0.416486	0.15404	0.369984	0.542326	0.0811615	0.0556275	0.0648103
ENC1	7.01976e-13	0.299695	0.708	0.566	1.40395e-09	0.287133	0.264531	0.372435	0.100987	0.278395	0.10699	0.873305	1.01344	0.0924802	0.0555817	0.640897			IFIT3	8.17023e-13	-0.263465	0.56	0.362	1.63405e-09	0.197833	0.595759	0.199145	0.109481	0.678925	0.260906	1.38129	1.16952	0.424492	0.667029	0.849164
ESCO2	6.53786e-80	0.970583	0.78	0.272	1.30757e-76	1.36851	0.238394	0.127291	0.0207132	0.127059	0.0527487	1.67515	0.0344607	0.00292394	0.00380432	0.0156197			IGFBP1	5.60755e-67	-0.484459	0.212	0.542	1.12151e-63	0.0309397	0.0317712	0.0617469	0.983004	0.316392	0.32915	0.657169	1.20595	0.674271	0.358931	1.70097
EZH2	8.23234e-64	0.910654	0.813	0.514	1.64647e-60	1.42313	0.595839	0.560132	0.270894	0.331598	0.476296	1.84864	0.216565	0.0781204	0.0755506	0.66719			IGFBP6	5.00377e-39	-0.748722	0.903	0.946	1.00075e-35	0.24963	0.653925	0.376516	0.233582	0.321324	1.51233	8.6125	11.8196	5.60391	5.06331	7.36632
FAM111A	1.85338e-21	0.952654	0.775	0.584	3.70676e-18	1.64829	0.777625	0.135448	0.401712	0.345175	0.778788	2.81269	0.695375	0.350654	0.400394	0.273871			IGFBP7	6.20351e-32	-0.749782	0.719	0.83	1.2407e-28	0.179965	0.603261	6.59585	0.769748	0.712081	0.999364	3.31943	5.41663	3.00334	2.03166	3.23351
FAM111B	4.52536e-21	0.878746	0.579	0.299	9.05071e-18	1.55914	0.351853	1.2743	0.0141267	0.0416421	0.0347182	1.54079	0.176582	0.000330401	0.00184625	-0.000396293			INHBB	1.34504e-35	-0.305125	0.351	0.533	2.69007e-32	2.76244	3.1605	0.954414	0.359402	0.76165	0.433857	0.194715	0.362363	0.0193571	0.00410391	0.159207
FAM83D	1.21327e-96	0.410846	0.722	0.214	2.42654e-93	0.356575	0.0622866	0.00796726	0.00709251	0.0162939	0.01104	0.517915	0.0145339	0.00511036	0.00135598	2.13855e-05			ISG15	1.6888e-05	-0.265942	0.63	0.462	0.0337761	0.239087	0.608194	0.484446	0.581404	1.23658	0.592858	1.3971	1.96671	0.797853	1.27394	1.32647
FANCD2	9.54777e-60	0.566785	0.737	0.366	1.90955e-56	0.731598	0.201838	0.0108291	0.100518	0.0265869	0.0359476	0.787028	0.0225759	0.00429021	0.0140127	0.0182144			ITGA2	1.20507e-31	-0.646052	0.265	0.519	2.41013e-28	0.510169	0.850478	0.178406	0.224439	1.15676	1.10881	0.681859	0.97728	0.154016	0.0363145	0.862833
FANCI	1.16727e-76	0.982271	0.833	0.44	2.33455e-73	1.66448	0.413609	0.176648	0.135338	0.116491	0.105402	1.90654	0.128737	0.0579247	0.071378	0.149105			ITGA6	4.33741e-13	-0.395593	0.464	0.549	8.67482e-10	5.97104	8.68123	2.36069	3.35468	3.6086	1.99202	1.03801	0.667387	0.226234	0.122619	0.130017
FBXO43	2.26297e-65	0.269229	0.536	0.061	4.52594e-62	0.0248033	0.0294847	0.0284781	0.00419298	0.00101354	0.00396145	0.309215	0.000740695	9.2033e-06	-9.41902e-05	5.74795e-06			ITGB5	4.97956e-44	-0.680034	0.743	0.876	9.95912e-41	0.373346	0.714796	0.286238	0.241746	0.379022	0.354193	2.63782	4.02152	1.16568	1.5439	1.51102
FBXO5	9.57844e-58	0.653872	0.766	0.442	1.91569e-54	0.877364	0.165229	0.382546	0.0868568	0.0629974	0.068549	1.09019	0.13259	0.0659366	0.0652708	0.0814768			KCTD12	3.1723e-38	-0.362335	0.466	0.603	6.34461e-35	-4.08942e-05	0.0617023	0.0970327	0.0154209	0.0169772	0.0192972	0.68562	0.560367	0.0963952	0.0860918	0.272636
FDFT1	1.41194e-16	0.328078	0.861	0.694	2.82387e-13	3.43558	3.79155	1.51841	1.29203	2.4005	1.28957	1.77807	1.43227	0.641829	1.02067	0.324515			KRT18	9.90771e-11	-0.264387	0.514	0.598	1.98154e-07	7.06463	8.31771	1.95775	5.45635	11.3782	3.90549	0.660043	0.725107	0.531942	0.324324	0.322253
FEN1	1.93126e-38	0.912865	0.694	0.362	3.86252e-35	1.71988	0.408716	0.0798807	0.137358	0.174639	0.0985928	1.77473	0.239906	0.082478	0.0351292	0.0554164			KRT19	2.06101e-48	-0.634066	0.655	0.82	4.12202e-45	16.783	20.3517	13.033	22.3728	35.2522	25.9754	1.37542	2.58596	1.83443	0.902104	4.24376
FOXM1	4.21547e-49	0.889376	0.766	0.505	8.43093e-46	0.570752	0.189632	0.103439	0.0151368	0.0276199	0.0155166	1.60565	0.144209	0.0368264	0.0422595	0.0113195			LBH	6.52682e-24	-0.669117	0.564	0.705	1.30536e-20	0.161543	0.54565	0.748042	0.118312	0.327763	0.387257	1.25268	1.88972	0.628736	0.480002	0.439466
GAS2L3	9.99661e-35	0.66128	0.646	0.271	1.99932e-31	0.336537	0.186764	0.0305893	0.105541	0.14353	0.0946436	1.00092	0.0435745	0.0213366	0.0178855	0.153854			LFNG	5.41047e-67	-0.443265	0.402	0.635	1.08209e-63	0.10491	0.0452911	0.000388767	0.0237415	0.0469474	0.00277049	0.135339	0.606633	0.0733671	0.0313572	0.0917211
GINS2	9.20545e-39	0.443951	0.722	0.479	1.84109e-35	0.801467	0.163316	0.00753302	0.00988812	0.163736	0.0268595	0.639495	0.116031	0.0112577	0.0362991	0.00211621			LIMA1	6.75501e-06	-0.310455	0.756	0.798	0.01351	7.03979	9.37882	4.59746	4.54683	7.94738	5.17306	1.92781	2.82115	1.25746	1.80134	0.8159
GINS4	1.60099e-18	0.422623	0.627	0.43	3.20199e-15	0.560285	0.327587	0.0515189	0.0580124	0.0768195	0.0362127	0.602282	0.139059	0.0180144	0.00297391	0.0131655			LONRF2	1.28557e-63	-0.769813	0.711	0.884	2.57113e-60	1.49256	2.10086	0.907997	0.561347	0.26305	1.7624	2.58452	4.15232	2.33149	1.38604	2.82859
GMNN	4.39949e-35	1.05863	0.78	0.536	8.79898e-32	4.70884	3.09571	0.945736	0.911547	0.514653	0.562797	3.41	0.965342	0.344585	0.284329	0.671826			LRIG1	3.76851e-08	-0.265739	0.441	0.491	7.53702e-05	2.15647	2.80471	0.583976	1.05441	0.319742	1.04262	0.349247	0.439309	0.261115	0.103431	0.530567
GTSE1	2.43203e-51	0.900616	0.746	0.43	4.86405e-48	1.13994	0.304034	0.113954	0.0357374	0.0415937	0.0975534	1.54956	0.0817123	0.0196763	0.0124475	0.0102562			LTBP2	3.19962e-21	-0.520768	0.72	0.791	6.39924e-18	0.0768698	0.178988	0.0280504	0.0934398	0.0499277	0.614036	1.35052	2.92182	1.82838	1.32981	4.69207
H1-3	2.24525e-14	0.437287	0.608	0.447	4.4905e-11	0.840356	0.117274	0.122788	0.183357	0.0982014	0.161418	0.639075	0.0917538	0.0377598	0.0406015	0.10821			MAF	1.15265e-108	-1.10659	0.769	0.932	2.30529e-105	0.0903186	0.306425	0.0530953	0.108404	0.0959707	0.5056	3.83132	7.32937	2.32328	1.7544	3.93603
H2AZ1	1.37872e-75	1.55187	0.976	0.688	2.75743e-72	9.57587	4.8254	2.46589	2.18033	2.35541	2.18401	10.8293	2.37969	1.15357	0.798317	3.32059			MCM6	1.04461e-23	-0.274688	0.405	0.541	2.08921e-20	1.88769	0.698241	0.0825367	0.123021	0.184874	0.117305	0.894846	0.491497	0.0761681	0.133253	0.0639511
H4C3	2.02388e-46	1.36202	0.904	0.634	4.04777e-43	11.728	4.01731	1.50787	3.44637	2.2516	2.40548	6.32541	1.39656	0.740603	0.512936	0.991708			MFAP4	4.16225e-112	-1.05084	0.979	0.993	8.3245e-109	0.447819	1.65908	1.02843	0.250071	0.336511	2.60787	19.392	36.2808	12.2277	12.0351	9.97439
HELLS	2.39245e-57	1.28681	0.809	0.501	4.78491e-54	2.25701	0.599262	0.974046	0.0662367	0.0925292	0.0747494	3.11979	0.329014	0.0351488	0.0538716	0.159259			MGLL	1.60704e-13	-0.521433	0.766	0.8	3.21408e-10	0.62758	2.12898	4.08051	1.1734	1.33494	1.1413	2.94065	3.91307	1.73988	1.91674	6.09578
HGF	4.3106e-07	0.297348	0.56	0.476	0.00086212	0.00555172	-0.00925854	0.00496096	0.00614887	0.0119497	0.0792987	0.638229	0.387301	0.0730681	0.0367812	1.41786			MIR503HG	3.8079e-08	-0.264555	0.523	0.542	7.6158e-05	0.0180299	0.0337979	0.00473506	0.012628	0.0196855	0.097108	0.382013	0.481102	0.208334	0.136815	0.327861
HJURP	2.3175e-64	0.853267	0.751	0.362	4.63499e-61	1.16978	0.137572	0.0051172	0.05234	0.0793003	0.110905	1.39538	0.0506457	0.0114633	0.0038339	0.000888857			MKI67	7.39244e-43	-0.349996	0.326	0.531	1.47849e-39	9.60885	3.03333	0.486082	0.494013	0.200852	0.524485	13.8051	0.588071	0.126741	0.1191	0.0204275
HMGA1	1.25044e-07	0.305856	0.656	0.561	0.000250089	6.52863	5.5574	1.04829	1.29671	3.54307	1.72675	1.31863	1.59494	0.292716	0.125914	1.88378			MME	6.97565e-38	-0.718187	0.469	0.699	1.39513e-34	0.13373	0.251426	0.163279	0.347426	0.182241	1.71175	3.88911	2.74586	1.26348	0.826617	5.26442
HMGB2	1.65622e-89	2.10045	0.957	0.67	3.31244e-86	11.5254	2.14196	1.39648	1.05638	0.659591	1.10546	14.0037	1.12044	0.737625	0.664351	0.867906			MMP11	5.38495e-78	-1.34904	0.533	0.728	1.07699e-74	0.108274	0.23523	0.168491	0.0136919	0.0709981	0.281878	1.19862	3.5472	0.401347	0.179953	0.732765
HMGB3	2.82201e-45	0.768481	0.789	0.522	5.64403e-42	1.72842	1.43525	3.56302	1.71304	0.460626	0.471982	1.72401	0.35313	0.228471	0.217071	0.231325			MMP14	3.9512e-110	-0.95828	0.961	0.975	7.90239e-107	1.08501	2.06954	0.66621	1.53148	1.62693	5.17249	13.2945	18.2422	14.7328	6.38039	16.004
HMGN2	1.75211e-76	1.32656	0.962	0.715	3.50422e-73	6.83478	3.16865	1.29361	1.38902	0.897284	1.05327	8.67625	2.01744	1.44416	1.36885	0.822176			MMP3	1.47282e-17	-0.329062	0.369	0.243	2.94565e-14	0.041667	0.140956	-0.00312299	-8.59102e-05	-0.000416148	0.158434	0.169354	0.452699	0.212708	0.0453606	1.00555
HMGN5	4.34239e-24	0.456088	0.713	0.478	8.68478e-21	0.997756	0.967157	1.21943	0.628931	0.502871	0.293497	1.03823	0.458062	0.207535	0.221682	0.254776			MMP7	7.04265e-224	-1.71969	0.496	0.959	1.40853e-220	69.2563	58.4968	15.689	8.194	53.5743	10.377	3.46278	7.13311	1.60781	0.45681	1.83826
HMMR	1.34074e-97	1.9763	0.914	0.515	2.68148e-94	4.80782	1.35641	0.511642	0.142525	0.131489	0.217831	7.01563	0.288209	0.0355908	0.0309589	0.0097039			MSX1	2.18089e-11	-0.398612	0.506	0.564	4.36177e-08	10.873	10.873	3.47482	8.41038	2.48606	4.35296	0.558423	0.852785	0.361784	0.243683	0.254105
HSD11B1	2.78228e-09	0.41428	0.871	0.737	5.56456e-06	0.0760389	0.355858	0.111853	0.152781	0.124657	0.855305	6.75804	5.96546	2.99797	3.66308	2.68017			MT2A	2.98711e-71	-1.58619	0.513	0.756	5.97422e-68	0.836974	0.767091	1.55908	4.51489	0.699415	3.63231	6.18715	6.47293	1.78993	0.529746	11.2778
HSP90AA1	1.31762e-35	0.48503	0.995	0.982	2.63524e-32	31.7322	26.9734	58.2078	21.7228	22.7239	33.7917	25.7384	17.8211	16.417	12.789	13.0177			NANOS1	6.80832e-55	-0.26802	0.299	0.558	1.36166e-51	0.003118	0.0214118	1.01572e-05	0.00469694	0.00826558	0.0294749	0.0594268	0.317815	0.00868469	0.00798755	0.142442
HSPH1	6.8313e-09	0.448823	0.77	0.672	1.36626e-05	4.38819	4.12426	13.2402	1.95462	2.77549	2.72027	2.63414	2.16854	0.747409	1.10976	0.982985			NASP	2.53174e-25	-0.623517	0.71	0.823	5.06348e-22	6.27339	4.81066	2.84397	2.38154	1.50452	2.44381	7.31965	3.23636	1.32368	1.27093	0.953115
HYLS1	2.42419e-45	0.397048	0.727	0.493	4.84837e-42	0.16794	0.0738728	0.73478	0.0554257	0.0234983	0.0420741	0.539185	0.0592831	0.0279506	0.0161215	0.0555464			NDNF	3.21021e-122	-0.949946	0.446	0.761	6.42042e-119	0.0346215	0.117153	0.0548952	0.00142593	0.0581369	0.0800707	0.787111	1.78846	0.278849	0.0784712	2.32911
IDI1	5.926e-10	0.386856	0.852	0.74	1.1852e-06	2.51633	2.38962	1.30929	1.21041	1.63629	0.896793	2.69829	1.85187	1.119	1.68954	0.482184			NEFM	1.51892e-21	-0.435627	0.399	0.51	3.03785e-18	0.0401783	0.0623271	0.000103853	0.00216071	0.0549294	0.182469	0.593843	0.619854	0.237989	0.0478176	2.14226
IFI44	5.75602e-07	0.3051	0.569	0.386	0.0011512	0.152126	0.217602	0.0377549	0.133743	0.173658	0.267028	0.978104	0.805238	0.21228	0.379996	0.3366			NES	6.44104e-127	-1.02509	0.432	0.813	1.28821e-123	0.290753	0.307585	0.0105193	0.0635829	0.052578	0.0538721	2.56741	2.56547	0.276683	0.279159	0.611985
IFT74	7.00869e-22	0.448095	0.861	0.666	1.40174e-18	2.11714	1.71597	7.3755	1.16585	0.936142	0.624904	2.01167	1.11335	0.768781	0.908518	0.795764			NPC2	5.69006e-74	-0.64388	0.987	0.993	1.13801e-70	3.50414	4.37784	5.40515	3.58144	2.89169	5.42234	24.5942	28.933	18.8032	14.7223	20.7677
INSIG1	1.78096e-05	0.464783	0.727	0.652	0.0356193	2.58884	3.00802	1.81309	1.41746	1.43303	0.947116	2.57065	1.73008	0.860919	1.1634	1.11056			NR2F1	9.1994e-24	-0.405397	0.677	0.791	1.83988e-20	0.0225535	0.251366	0.138735	0.0727698	0.0207168	0.362804	1.3607	1.76571	0.429874	0.843934	0.400845
ITGA6	8.09351e-10	0.432258	0.636	0.54	1.6187e-06	5.97104	8.68123	2.36069	3.35468	3.6086	1.99202	1.03801	0.667387	0.226234	0.122619	0.130017			NR4A2	4.65063e-62	-0.607327	0.566	0.736	9.30126e-59	2.3527	1.97259	1.69747	2.1206	1.50128	3.16101	0.715311	1.60552	0.554293	0.419501	2.44246
JPT2	1.37509e-22	0.262971	0.742	0.546	2.75019e-19	1.69888	1.6894	5.79188	1.95375	1.81489	1.16215	0.763627	0.484624	0.339766	0.24815	0.399272			NT5E	2.18966e-36	-0.748611	0.616	0.759	4.37933e-33	0.338701	0.536032	0.470868	0.358316	0.711151	0.44139	3.17043	3.09369	0.952744	0.936407	2.22814
KCTD12	3.03316e-06	0.303961	0.598	0.523	0.00606632	-4.08942e-05	0.0617023	0.0970327	0.0154209	0.0169772	0.0192972	0.68562	0.560367	0.0963952	0.0860918	0.272636			OAS1	3.4996e-09	-0.348209	0.375	0.284	6.9992e-06	0.0556891	0.184391	-0.0010769	0.137366	0.908587	0.192078	0.37861	0.509842	0.036596	0.0658752	0.100537
KIF11	1.49636e-84	1.46664	0.833	0.341	2.99271e-81	2.04835	0.325033	0.0657498	0.0980561	0.0595892	0.0822975	3.62724	0.0520802	0.100008	0.0604877	0.00403528			OLFM4	9.3713e-139	-0.613318	0.301	0.719	1.87426e-135	4.54828	7.95605	0.298747	0.0727188	0.150249	0.160036	0.646293	0.850431	0.0352585	0.00210305	0.0377331
KIF14	1.94223e-96	1.76369	0.89	0.401	3.88446e-93	2.80473	0.403191	0.874396	0.0531883	0.17443	0.247438	5.29728	0.181055	0.0243189	0.0396215	0.0587346			OLFML2B	4.91372e-21	-0.386969	0.388	0.533	9.82744e-18	0.00296731	0.130204	0.00105862	0.0387155	0.0142078	0.0324661	0.27075	0.692456	0.271229	0.149368	0.207024
KIF15	1.59569e-86	0.8771	0.804	0.29	3.19137e-83	1.01488	0.362208	0.72034	0.0232749	0.0292697	0.0551336	1.44489	0.041111	0.00882411	0.00758321	-0.0211539			PALMD	4.94182e-09	-0.282785	0.67	0.752	9.88364e-06	0.204475	0.293677	1.98223	0.180563	0.115158	0.537415	1.17432	1.80139	0.979952	1.11136	0.606194
KIF18A	4.15693e-54	0.964786	0.746	0.429	8.31385e-51	1.21435	0.398635	0.27331	0.0635984	0.162069	0.17054	1.74328	0.0761135	0.0670056	0.00390544	0.000841988			PDGFRA	2.0866e-23	-0.55471	0.822	0.88	4.1732e-20	0.0962645	0.330184	0.139366	0.219007	0.0281469	0.98447	4.92725	5.52942	3.75145	2.74945	3.81712
KIF20A	9.56316e-56	1.16777	0.756	0.424	1.91263e-52	0.367471	0.0835661	0.0361765	0.0110659	0.0212831	0.000613623	2.28639	0.0574697	0.00688786	0.00621112	0.006938			PDGFRB	1.81832e-137	-1.27363	0.937	0.976	3.63664e-134	0.343977	1.113	0.361527	0.258763	0.12114	1.58827	14.1131	22.3293	8.94444	5.52785	13.5096
KIF20B	8.92088e-80	1.74256	0.88	0.462	1.78418e-76	3.30733	1.25383	0.788332	0.268326	0.26524	0.464796	5.7857	0.35248	0.134471	0.10889	0.0204709			PDPN	8.05003e-36	-0.460798	0.33	0.594	1.61001e-32	0.0293902	0.177447	0.00160553	0.0485882	0.0207799	0.437133	0.615254	1.05292	1.15278	0.294941	1.80623
KIF23	9.0339e-67	1.34818	0.809	0.444	1.80678e-63	2.39559	0.492098	0.176711	0.0284271	0.0697931	0.156721	3.27865	0.22739	0.0513875	0.0506894	0.182356			PDXK	7.72993e-20	-0.262837	0.562	0.699	1.54599e-16	1.03306	0.64304	1.72479	1.49001	2.22949	1.71997	0.57105	1.10432	0.708949	0.617943	1.55039
KIF2C	4.53366e-85	1.11081	0.842	0.44	9.06732e-82	0.610687	0.160704	0.105222	0.0696074	0.0423853	0.0865627	2.08894	0.0245568	0.0183991	0.00998057	0.0125047			PGR	9.41091e-79	-0.912748	0.63	0.839	1.88218e-75	1.82079	2.64215	0.564224	0.234048	0.119584	0.366092	1.81534	2.93553	0.506872	0.579798	0.324707
KIF4A	8.65721e-81	1.49372	0.847	0.39	1.73144e-77	1.76327	0.513448	0.740196	0.0754504	0.0970592	0.09001	3.67426	0.115468	0.0188432	0.0230115	0.00654675			PGRMC1	2.91879e-13	-0.280863	0.762	0.811	5.83758e-10	4.06393	4.47126	2.71662	4.72112	2.72601	2.28476	4.60302	3.41383	2.38263	2.33302	2.17614
KIFC1	5.93422e-31	0.774082	0.627	0.272	1.18684e-27	1.02555	0.118461	0.0148556	0.0389059	0.0292282	0.0305196	1.19636	0.0340646	0.00293667	0.00384515	0.00173372			PHLDA1	7.91102e-82	-1.17648	0.644	0.84	1.5822e-78	1.06291	1.13808	0.805493	0.118999	1.0232	0.873721	3.36076	5.03325	1.37038	0.860427	7.9337
KNL1	4.50548e-92	1.47808	0.856	0.412	9.01095e-89	1.40088	0.352494	0.353536	0.0299214	0.0475056	0.203456	3.61854	0.154892	0.00566069	0.0111803	0.000604218			PLAT	2.83477e-204	-1.98044	0.602	0.957	5.66954e-201	0.178628	0.639639	0.218111	0.0627234	0.175403	0.74921	5.58765	12.1202	1.43936	0.810707	3.93608
KNSTRN	6.26473e-20	0.394433	0.646	0.493	1.25295e-16	0.458121	0.253187	0.338152	0.120676	0.14501	0.0788248	0.582916	0.0876578	0.0801556	0.0433939	0.0134039			PLPP1	1.09536e-13	-0.52128	0.73	0.782	2.19073e-10	0.0705553	0.205564	0.37294	0.164895	0.117154	0.230789	1.03299	3.02976	1.39976	1.39271	0.594036
KPNA2	6.8181e-54	1.08336	0.818	0.55	1.36362e-50	1.97282	1.08426	0.652747	0.84507	0.70795	0.510837	2.72482	0.361239	0.256493	0.190896	0.126345			PODXL	3.37382e-08	-0.368161	0.659	0.701	6.74764e-05	2.45483	6.57569	0.930072	2.41816	3.67922	2.19071	0.882399	1.74005	0.680351	0.896129	0.529168
LIG1	2.94094e-47	0.392189	0.727	0.412	5.88188e-44	1.09401	0.290538	0.177458	0.163591	0.142701	0.284873	0.569738	0.133348	0.0202377	0.0256862	0.0992657			PRSS23	1.24026e-23	-0.630318	0.881	0.917	2.48052e-20	0.303726	0.524522	0.712107	0.286511	0.336984	0.577241	5.89581	6.99641	2.46268	3.25747	1.79943
LMNB1	4.93988e-44	0.745039	0.718	0.387	9.87977e-41	1.54167	0.641079	0.0958491	0.136428	0.0953947	0.111283	1.19699	0.0974497	0.016318	0.0229185	0.00131506			PTX3	3.8963e-15	-0.463491	0.266	0.442	7.7926e-12	0.0561566	0.184204	0.00453612	0.0382979	0.0550923	0.0364739	0.168696	0.598939	0.00271992	0.00586661	0.0387252
LMNB2	8.4945e-42	0.624109	0.756	0.458	1.6989e-38	0.887643	0.549999	0.372847	0.23772	0.248432	0.256913	1.14833	0.269592	0.0601659	0.144271	0.00228091			RAB27B	8.17529e-72	-0.489943	0.466	0.664	1.63506e-68	0.124326	0.0982573	0.0702545	0.0327574	0.210102	0.141056	0.498499	0.756887	0.235515	0.0763766	0.278644
LMO7	1.19545e-39	1.0378	0.789	0.473	2.3909e-36	1.7303	1.42081	2.77404	1.94501	4.61782	1.75916	2.9488	0.603851	0.445249	0.190308	0.25519			RAB31	9.22629e-09	-0.333559	0.886	0.889	1.84526e-05	0.384686	0.940189	0.29297	0.196474	0.500165	2.35583	4.12334	5.94624	6.34667	3.97607	6.30851
LPIN2	3.60476e-11	0.291126	0.737	0.572	7.20951e-08	0.614318	0.447881	1.54372	2.14583	1.8126	1.40679	1.28669	0.708053	0.793662	0.670291	0.429979			RARRES2	8.8606e-19	-0.530072	0.411	0.567	1.77212e-15	3.87308	4.65302	3.11281	1.66007	2.85534	2.24125	0.789542	1.29197	0.585663	0.348965	2.13346
LRRCC1	1.18691e-16	0.443541	0.699	0.557	2.37382e-13	0.81684	0.458975	1.30745	0.145952	0.124469	0.0636461	0.925511	0.271722	0.209417	0.247358	0.0759559			RBP1	6.41615e-107	-1.07337	0.876	0.97	1.28323e-103	0.492355	0.834167	0.248825	0.267774	0.206749	0.772316	8.87462	12.2194	4.31182	3.51909	3.90597
MAD2L1	8.33714e-74	1.15107	0.833	0.421	1.66743e-70	1.38218	0.20611	0.231661	0.100978	0.169817	0.0644943	2.43863	0.208319	0.0368666	0.0342118	0.00885488			RESF1	6.0682e-33	-0.435589	0.584	0.743	1.21364e-29	9.07009	12.8987	4.47469	11.5032	5.35439	8.00204	1.27823	1.49438	1.02118	0.613576	1.10886
MASTL	4.98111e-54	0.982289	0.828	0.517	9.96221e-51	1.48937	0.378285	0.23113	0.180746	0.231278	0.308724	2.37103	0.330181	0.269083	0.223629	0.0390193			RGS2	9.74876e-35	-0.793364	0.606	0.791	1.94975e-31	0.155613	0.332144	0.152568	0.0830679	0.158291	0.740528	2.86048	4.99986	1.70049	1.71386	1.52466
MCM10	5.20669e-25	0.565731	0.598	0.287	1.04134e-21	1.1023	0.25824	-0.00234015	0.00671842	0.00545246	0.0158732	0.818064	0.0783564	0.00265162	0.0203431	0.0142554			RIN2	1.11866e-17	-0.653685	0.376	0.525	2.23731e-14	0.263263	0.338786	1.34426	0.688776	0.561486	0.760013	0.823501	1.26636	0.458849	0.178794	2.06873
MCM3	1.18644e-28	0.748357	0.703	0.435	2.37288e-25	2.51114	1.20514	0.210099	0.339895	0.375839	0.263771	1.6963	0.52901	0.113809	0.20992	0.13668			RND3	9.21163e-15	-0.251535	0.934	0.889	1.84233e-11	1.34961	2.08825	0.836588	1.51066	2.58994	6.19695	7.32047	9.71544	9.0003	7.33239	19.3415
MCM4	1.00854e-35	0.566387	0.722	0.489	2.01707e-32	1.41865	0.620886	0.0300046	0.17444	0.175994	0.165753	0.947593	0.195338	0.0413226	0.0777843	0.13466			RORB	6.6328e-14	-0.713174	0.84	0.844	1.32656e-10	0.194023	0.441149	0.200073	0.127787	0.0998711	1.16923	4.51319	8.03842	4.53328	3.42961	2.4594
MCM5	7.06526e-27	0.286985	0.612	0.39	1.41305e-23	0.639349	0.218841	0.0154373	0.0401763	0.0758659	0.025654	0.386935	0.0819916	0.00624052	0.0407013	-0.00398396			RPGR	3.71344e-32	-0.282978	0.454	0.619	7.42688e-29	0.384297	0.817391	7.38146	0.567455	0.497334	0.991933	0.40688	0.590639	0.399199	0.198605	0.737904
MCM6	5.30089e-26	0.437612	0.713	0.511	1.06018e-22	1.88769	0.698241	0.0825367	0.123021	0.184874	0.117305	0.894846	0.491497	0.0761681	0.133253	0.0639511			S100A10	1.3949e-36	-0.298255	0.49	0.635	2.7898e-33	5.71575	4.68967	4.07251	3.65087	4.80542	3.01408	0.22336	0.562796	0.28387	0.15977	0.478807
MDM2	2.22737e-14	0.387338	0.789	0.613	4.45474e-11	0.992177	1.04644	2.93412	1.06151	2.20037	1.07873	1.78602	0.948784	1.02847	0.742781	0.686735			S100A11	1.0633e-19	-0.331938	0.843	0.912	2.1266e-16	4.29184	5.76766	6.46621	5.55533	6.82438	4.92523	2.71074	3.95479	2.36307	2.55522	2.17432
MELK	7.00897e-74	1.01413	0.813	0.433	1.40179e-70	1.32149	0.26448	0.638284	0.0802734	0.117067	0.140725	1.90423	0.0664231	0.063842	0.0393479	-0.00106821			S100A16	6.20946e-40	-0.555517	0.714	0.871	1.24189e-36	3.95208	3.29921	0.954823	1.56856	3.12322	1.33251	2.09061	2.65076	1.18878	1.09472	1.4993
MKI67	5.43644e-115	2.46243	0.957	0.417	1.08729e-111	9.60885	3.03333	0.486082	0.494013	0.200852	0.524485	13.8051	0.588071	0.126741	0.1191	0.0204275			SDC4	4.75254e-09	-0.421223	0.58	0.692	9.50508e-06	1.54852	1.56292	1.17816	1.97419	2.94974	1.8729	1.13089	1.68022	1.6248	0.758877	5.71769
MME	3.98838e-10	0.576161	0.732	0.568	7.97676e-07	0.13373	0.251426	0.163279	0.347426	0.182241	1.71175	3.88911	2.74586	1.26348	0.826617	5.26442			SEC14L1	2.15333e-67	-0.678964	0.512	0.779	4.30667e-64	3.01793	5.0389	1.49641	1.18643	1.94407	1.07247	0.766106	1.8417	0.632268	0.441146	0.51431
MNS1	6.72939e-15	0.361863	0.593	0.439	1.34588e-11	1.40444	0.444338	9.77177	0.0971205	0.105763	0.140525	0.491368	0.0470251	0.0170123	0.0487077	0.0502877			SELENOP	8.52933e-07	-0.308904	0.878	0.896	0.00170587	5.29055	9.12537	3.71877	15.3134	4.28348	7.83696	2.78361	4.70536	2.44544	3.18917	2.22303
MT2A	2.91693e-22	0.531859	0.837	0.594	5.83386e-19	0.836974	0.767091	1.55908	4.51489	0.699415	3.63231	6.18715	6.47293	1.78993	0.529746	11.2778			SEMA7A	1.45982e-20	-0.433903	0.429	0.563	2.91963e-17	0.0213937	0.096421	0.0874191	0.219154	0.844204	0.664313	0.536967	0.842362	0.530411	0.193804	0.517882
MXD3	6.30025e-62	0.597226	0.77	0.453	1.26005e-58	0.219772	0.0450339	-0.0116172	0.0322356	0.0363218	0.0976918	0.856826	0.0178657	0.0331873	0.0136631	0.0350772			SERPINA1	1.2848e-20	-0.425045	0.329	0.491	2.56961e-17	3.77786	8.8064	2.09331	0.810439	0.778692	1.12333	0.386405	0.560959	0.118168	0.0204621	0.152848
MYBL1	8.96183e-25	0.28869	0.56	0.228	1.79237e-21	0.131515	0.198559	0.0334849	0.00238133	0.00676878	0.00803762	0.435903	0.0626352	0.130361	0.0447023	0.0307907			SERPINA5	8.50954e-06	-0.34361	0.55	0.47	0.0170191	4.41429	7.29031	2.53847	9.30042	1.87698	4.84992	0.403549	0.737377	0.611349	0.232157	0.500193
NASP	4.35007e-48	1.06099	0.952	0.713	8.70014e-45	6.27339	4.81066	2.84397	2.38154	1.50452	2.44381	7.31965	3.23636	1.32368	1.27093	0.953115			SFRP1	1.72759e-121	-1.36277	0.527	0.818	3.45517e-118	0.191662	0.508267	0.111232	0.0258228	0.0458796	0.134916	3.03719	4.20605	0.372545	0.332497	0.972673
NCAPG	2.5877e-51	1.47587	0.78	0.453	5.17541e-48	2.47003	0.337391	0.196987	0.0367032	0.0140344	0.0427152	3.74347	0.178947	0.0259209	0.0584684	0.0262843			SLC12A2	3.78222e-21	-0.392194	0.465	0.575	7.56443e-18	2.6648	2.73747	1.31873	0.508725	0.773184	0.952068	0.692911	0.656345	0.188679	0.118982	0.155225
NCAPG2	1.53923e-64	1.13841	0.804	0.426	3.07846e-61	1.01654	0.384904	0.0088393	0.0737625	0.0533616	0.112397	2.44575	0.156031	0.0774314	0.0704053	0.179367			SLC20A1	2.72238e-94	-1.0884	0.585	0.838	5.44476e-91	1.17893	1.90969	1.45768	0.866882	1.26975	1.13596	3.26109	3.82052	0.531625	0.623328	0.821198
NCAPH	2.25231e-87	1.05953	0.837	0.374	4.50461e-84	2.15571	0.291692	0.219845	0.0319394	0.151382	0.0194754	1.98756	0.0960748	0.00732586	0.00831105	0.0186656			SLC2A3	3.81294e-32	-0.261441	0.501	0.688	7.62587e-29	0.03021	0.00464608	0.00520358	0.021315	0.0209117	0.164808	0.60955	0.795465	0.68097	0.382403	1.46788
NDC80	3.61323e-88	1.55651	0.876	0.448	7.22646e-85	2.68234	0.412252	0.371724	0.0506233	0.0581631	0.0439887	4.11692	0.0554	0.11626	0.0749584	0.0170089			SLC40A1	6.74011e-20	-0.525523	0.581	0.718	1.34802e-16	0.43004	0.753452	0.361568	0.494699	0.627761	0.472407	0.632141	2.06097	0.908428	0.809788	1.07063
NEIL3	1.74176e-105	0.34819	0.689	0.154	3.48353e-102	0.229763	0.0248537	0.0166249	0.000561127	0.0176124	0.00558572	0.417619	0.00192155	0.000273499	3.63621e-05	0.00226604			SLC7A8	2.26581e-31	-0.427344	0.683	0.83	4.53161e-28	0.0865754	0.147521	0.0103074	0.25318	0.299308	0.33545	1.71154	2.05271	1.30906	0.991095	0.981014
NEK2	6.93491e-65	0.823671	0.775	0.426	1.38698e-61	0.908111	0.0532415	1.23857	0.013902	0.0651883	0.0805363	1.32037	0.0441316	0.00501218	0.00811693	0.00678163			SOX17	3.73107e-29	-0.454656	0.456	0.579	7.46214e-26	7.90051	11.2445	2.49324	3.60363	2.33047	1.23656	0.43156	0.732319	0.238926	0.0994447	0.119769
NES	4.3175e-15	0.579434	0.756	0.567	8.635e-12	0.290753	0.307585	0.0105193	0.0635829	0.052578	0.0538721	2.56741	2.56547	0.276683	0.279159	0.611985			SPATA13	5.93384e-19	-0.250098	0.413	0.529	1.18677e-15	1.92756	3.56086	1.49489	0.704419	0.337684	0.446066	0.150475	0.382538	0.143661	0.0766165	0.170744
NQO1	2.34132e-20	0.443698	0.837	0.707	4.68263e-17	1.52819	1.0954	3.23667	2.18493	1.46059	0.964446	1.88921	0.658181	0.823909	1.08529	0.640022			SPON1	6.8175e-07	-0.364657	0.693	0.747	0.0013635	5.29406	7.24409	1.81938	3.11479	3.94384	2.82335	2.19506	2.40526	1.13479	1.36473	1.29935
NUF2	8.91944e-96	1.58403	0.856	0.253	1.78389e-92	1.84223	0.490699	0.469853	0.0832417	0.103598	0.215828	4.1511	0.124488	0.0285058	0.0302893	-0.0169934			SPON2	5.82696e-45	-0.72407	0.982	0.992	1.16539e-41	0.611781	0.952143	0.894311	0.521925	0.414422	3.02405	17.8774	28.8674	13.2098	13.479	7.4726
OLFM4	2.01779e-13	0.255125	0.675	0.509	4.03558e-10	4.54828	7.95605	0.298747	0.0727188	0.150249	0.160036	0.646293	0.850431	0.0352585	0.00210305	0.0377331			SPRY1	9.57777e-96	-0.547711	0.353	0.659	1.91555e-92	1.99378	2.30951	0.554977	0.370814	0.502441	0.343239	0.47177	0.782554	0.0632727	0.0308015	0.114664
ORC6	2.35853e-50	1.10147	0.813	0.515	4.71706e-47	0.983496	0.47989	0.699262	0.130141	0.169991	0.0827467	2.65007	0.18769	0.269156	0.185477	0.218176			SRPX2	2.05e-25	-0.606608	0.502	0.639	4.1e-22	0.0516915	0.147362	0.0368561	0.0411392	0.00464217	0.106434	1.20591	1.25089	0.600564	0.227179	0.652478
OTULINL	2.10262e-19	0.485019	0.622	0.337	4.20525e-16	0.0740322	0.033934	0.00852451	0.0454986	0.0224019	0.013482	1.17021	0.703744	0.171873	0.175835	0.145246			STAMBPL1	2.05117e-14	-0.465238	0.454	0.584	4.10234e-11	0.0643112	0.143017	0.156416	0.020183	0.0270095	0.153505	1.03556	1.20889	0.490874	0.387151	0.538631
PAPSS1	1.10861e-16	0.270165	0.756	0.566	2.21721e-13	1.30073	2.18858	1.33116	2.89421	0.927035	0.824115	1.00225	0.735883	0.509993	0.390665	0.266125			STC1	2.02991e-128	-1.93019	0.627	0.892	4.05982e-125	3.08595	9.76929	2.66624	4.70811	1.5881	9.01986	13.942	16.2958	8.16702	1.50996	53.0622
PARPBP	9.6796e-58	0.965463	0.789	0.466	1.93592e-54	0.592695	0.292619	0.0435214	0.0414382	0.129969	0.0362348	1.85965	0.152642	0.0668927	0.0619275	0.00591932			STMN1	1.56193e-20	-0.533569	0.623	0.727	3.12387e-17	8.25842	5.87235	1.33019	1.49196	1.17009	1.43842	12.3521	2.08081	0.794321	0.806921	0.795774
PBK	1.96714e-89	1.32836	0.871	0.467	3.93428e-86	1.41118	0.296207	0.0449096	0.00690724	0.048886	0.0196953	2.9656	0.0953224	0.0148871	0.0468794	0.0126738			SULF1	5.43411e-27	-0.72823	0.277	0.516	1.08682e-23	0.0889918	0.45542	0.0377945	0.0426173	-0.000605345	0.260339	1.48284	1.7422	0.39356	0.323831	0.521852
PCLAF	1.18555e-90	1.35362	0.876	0.374	2.37109e-87	2.29562	0.645187	0.176114	0.0851384	0.106206	0.00767545	3.47781	0.366951	0.0940542	0.0387843	0.0313332			TACSTD2	4.37138e-65	-0.554612	0.452	0.685	8.74277e-62	12.3029	10.5473	3.89732	2.07649	13.7459	3.85803	0.774528	1.02797	0.341231	0.164654	0.613335
PCM1	1.91095e-12	0.338212	0.909	0.815	3.8219e-09	5.29318	6.60993	9.65154	6.53578	3.54506	7.1323	3.98202	2.79957	2.35045	2.37112	3.6295			TFF3	5.70319e-10	-0.325877	0.413	0.494	1.14064e-06	4.27527	8.15119	2.2437	4.20873	3.63224	3.42895	0.598631	0.678264	0.323114	0.211529	0.481143
PCNA	3.59123e-34	1.06702	0.737	0.492	7.18247e-31	2.24223	0.585233	0.325539	0.349192	0.354712	0.160161	2.45269	0.397368	0.0617161	0.110589	0.194938			THBS1	6.44768e-10	-0.273211	0.376	0.489	1.28954e-06	0.0587035	0.0176198	0.0146443	0.0616955	0.0193822	0.171148	0.803623	0.63436	0.268514	0.243637	0.943273
PGRMC1	6.78157e-13	0.42181	0.9	0.737	1.35631e-09	4.06393	4.47126	2.71662	4.72112	2.72601	2.28476	4.60302	3.41383	2.38263	2.33302	2.17614			THBS2	9.82964e-95	-0.964189	0.423	0.745	1.96593e-91	0.0410016	0.140451	-0.0175376	0.0251281	0.134765	0.633701	0.908502	2.10446	0.748033	0.183705	8.03021
PHF19	1.06509e-56	0.794651	0.823	0.47	2.13017e-53	0.332034	0.143576	0.0243419	0.0364823	0.030917	0.060867	1.72996	0.196386	0.315597	0.20342	0.149882			TIMP2	2.53158e-18	-0.383135	0.994	0.987	5.06316e-15	1.22783	1.70369	0.855936	1.40628	3.45439	5.7643	20.1105	29.8337	21.5682	20.02	22.5405
PHGDH	8.89799e-26	0.46117	0.804	0.634	1.7796e-22	1.903	0.929648	0.388766	0.936582	0.838778	0.76134	1.26675	0.255131	0.765529	0.284919	0.43144			TMEM158	2.27383e-49	-0.744036	0.577	0.785	4.54765e-46	0.0863086	0.197312	0.242225	0.0634108	0.0855887	0.875007	2.49769	2.66816	1.98642	0.743079	16.1041
PIF1	9.90859e-27	0.282957	0.689	0.444	1.98172e-23	0.461303	0.0549441	0.0429369	0.00986769	0.0127901	0.0598983	0.41985	0.0528341	0.0985154	0.0669842	0.0138782			TMTC1	1.227e-06	-0.268316	0.513	0.595	0.002454	0.30016	0.346924	0.249244	1.00445	0.267094	0.907547	0.542295	0.70644	0.286325	0.304857	0.127108
PIMREG	2.08817e-53	0.706296	0.708	0.273	4.17633e-50	0.275326	0.110222	0.00550081	0.0125148	0.0348509	0.0137615	1.07687	0.0708551	0.00275202	0.00595531	0.00302991			TNFRSF12A	2.20021e-106	-0.974957	0.436	0.767	4.40042e-103	4.34554	3.49035	1.86811	1.09942	4.08413	1.56745	0.946889	2.24501	0.552374	0.224046	3.54725
PLK1	1.55011e-65	0.522508	0.703	0.243	3.10022e-62	0.381944	0.109419	0.030517	0.00973292	0.0525762	3.21235e-06	0.695608	0.0134026	0.00378379	0.000775016	-0.000210233			TNFRSF19	3.2837e-22	-0.295972	0.548	0.627	6.5674e-19	0.00925112	0.0885112	0.330882	0.00960143	0.0271996	0.139687	0.411789	0.608286	0.198981	0.196257	0.165596
PLK4	1.15991e-05	0.393979	0.478	0.336	0.0231982	0.52001	0.263749	1.94895	0.0171244	0.0150827	0.134735	0.502046	0.016125	0.0207542	0.00423711	0.00356476			TNFSF10	1.60743e-09	-0.254893	0.366	0.458	3.21486e-06	0.795223	1.48871	0.799908	1.29888	0.643486	0.617894	0.318104	0.339457	0.119274	0.0380776	0.194992
POLD3	2.0855e-14	0.380956	0.718	0.536	4.171e-11	1.05506	0.417512	0.447877	0.399963	0.435135	0.481698	0.964699	0.420609	0.27964	0.280955	0.704636			TOP2A	1.14789e-17	-0.471836	0.514	0.592	2.29579e-14	12.4683	3.39331	3.22008	0.390646	0.472894	1.38637	23.0382	0.930552	0.260872	0.204386	0.163104
POLQ	1.25689e-51	0.674446	0.727	0.436	2.51377e-48	1.01526	0.307316	0.0342201	0.0271485	0.0625032	0.100419	1.01407	0.0542426	0.0101861	0.0177413	0.0030312			TRIB2	1.30372e-40	-0.386395	0.528	0.686	2.60745e-37	0.796568	1.26402	0.867934	1.07412	1.25845	1.05788	0.459017	0.852437	0.367226	0.258735	0.45811
PRC1	1.75451e-95	1.33604	0.89	0.47	3.50903e-92	1.70428	0.300684	0.111777	0.05013	0.115244	0.189546	2.93645	0.0619051	0.0212771	0.0206379	0.049267			TSC22D1	3.82686e-26	-0.513632	0.581	0.693	7.65372e-23	3.40759	3.12896	1.73999	2.74631	3.01365	2.34827	1.20055	1.29031	0.686847	0.370332	0.43159
PRR11	3.26118e-54	0.847781	0.761	0.453	6.52236e-51	0.821676	0.251794	0.0254456	0.0436701	0.08965	0.0505317	1.49657	0.149142	0.0440454	0.0261048	0.0234416			TSPAN5	1.51586e-28	-0.645319	0.854	0.917	3.03172e-25	0.132707	0.434664	0.291699	0.4606	0.195259	1.01137	6.40089	6.11994	3.28298	2.73438	1.98462
PSIP1	9.31245e-53	1.11706	0.928	0.729	1.86249e-49	3.72138	2.25309	7.36343	1.24728	1.10725	2.2402	6.77531	2.05191	1.44839	1.28253	0.685482			TWIST1	5.70338e-26	-0.333465	0.442	0.588	1.14068e-22	0.00873135	0.0295957	-4.69335e-05	0.0317045	-0.00220319	0.0543241	0.456014	0.702136	0.583362	0.219473	1.11641
PSMC3IP	1.27303e-36	0.672798	0.708	0.453	2.54606e-33	0.508279	0.181681	0.745985	0.0601661	0.147604	0.0837613	1.16267	0.138501	0.057113	0.108435	0.143897			UGCG	6.97203e-06	-0.250109	0.515	0.571	0.0139441	1.82459	2.05433	2.36522	0.915108	1.38811	1.31293	0.670463	0.735199	0.601702	0.351227	0.647855
PSRC1	1.19026e-22	0.317734	0.598	0.381	2.38052e-19	0.137387	0.0256713	0.00222786	0.0204598	0.00435646	0.027563	0.400459	0.030764	0.0112339	0.0164661	0.0158476			ZFP36L2	5.65804e-07	-0.376436	0.627	0.688	0.00113161	2.77414	3.07644	3.57566	3.36884	3.65968	3.01693	1.43339	1.75329	0.97302	0.88959	1.22282
PTTG1	1.45489e-80	1.49893	0.856	0.395	2.90977e-77	1.31814	0.447057	0.754458	0.151144	0.136395	0.134482	3.90092	0.171342	0.0279849	0.0773282	0.156275
RAD51AP1	1.83617e-32	0.574861	0.627	0.319	3.67234e-29	0.379369	0.0953155	0.0666584	0.0149543	0.0662142	0.00784523	0.83466	0.0647144	0.0210952	0.0154993	0.0181771
RBBP8	1.12234e-20	0.582261	0.813	0.641	2.24468e-17	6.98021	8.02849	2.34789	1.99537	2.25427	1.72826	2.0664	1.08676	0.413312	0.681984	0.417498
RBP1	1.10254e-06	0.279968	0.986	0.898	0.00220507	0.492355	0.834167	0.248825	0.267774	0.206749	0.772316	8.87462	12.2194	4.31182	3.51909	3.90597
RFC4	2.67576e-09	0.481318	0.589	0.487	5.35152e-06	0.969634	0.39616	0.16462	0.290887	0.198551	0.143592	0.761301	0.142665	0.0515053	0.073245	0.0827145
RRM1	2.29576e-44	1.03871	0.88	0.634	4.59152e-41	2.79689	1.13689	0.234729	0.294464	0.473079	0.55481	4.29443	1.03411	0.995419	0.559144	1.34303
RRM2	3.2616e-105	1.3397	0.842	0.3	6.52319e-102	1.0364	0.187687	0.130904	0.0271406	0.099252	0.062155	2.94575	0.0758707	0.025106	0.00442336	0.020123
SFRP1	4.58201e-12	0.452357	0.751	0.614	9.16402e-09	0.191662	0.508267	0.111232	0.0258228	0.0458796	0.134916	3.03719	4.20605	0.372545	0.332497	0.972673
SGO1	2.25793e-83	1.02562	0.799	0.311	4.51585e-80	1.48229	0.253934	1.00521	0.0421776	0.0798585	0.103049	1.84233	0.0503634	0.00304999	0.00727086	0.00515535
SGO2	8.55452e-66	1.38804	0.842	0.504	1.7109e-62	1.45237	0.409734	2.1277	0.0584577	0.0949396	0.16618	3.50353	0.144312	0.11592	0.0777938	0.394193
SHCBP1	6.14899e-98	1.62289	0.904	0.477	1.2298e-94	0.957233	0.419655	0.280321	0.0428706	0.0235499	0.0438523	4.41726	0.0944606	0.0505776	0.070878	0.00355261
SKA3	3.97033e-35	0.613976	0.636	0.269	7.94065e-32	0.547746	0.190653	0.0876499	0.0115498	0.0253652	0.0143498	0.9293	0.0830372	0.0256163	0.0300502	0.00925718
SLC20A1	8.35914e-23	0.497676	0.847	0.671	1.67183e-19	1.17893	1.90969	1.45768	0.866882	1.26975	1.13596	3.26109	3.82052	0.531625	0.623328	0.821198
SMC1A	2.36528e-37	1.06466	0.842	0.652	4.73056e-34	6.41431	2.64373	2.62092	1.30787	1.53596	1.66706	5.46842	1.74723	0.852969	1.20401	0.441768
SMC2	1.76684e-84	1.61224	0.928	0.395	3.53367e-81	4.86453	1.98708	0.968111	0.63364	0.810856	0.712799	6.67221	0.755672	0.453732	0.382315	0.627025
SMC4	1.8775e-100	2.07827	0.967	0.609	3.75501e-97	12.4709	5.78268	3.07876	1.96233	1.59808	2.4856	15.9635	1.57507	0.977115	0.904208	0.663252
SPA17	4.6852e-43	0.524449	0.775	0.518	9.3704e-40	0.807138	0.59024	12.7199	0.334332	0.367755	0.28709	1.0449	0.286541	0.10607	0.237683	0.189258
SPAG5	1.35382e-69	0.676296	0.785	0.411	2.70764e-66	0.894566	0.211848	0.391418	0.0377615	0.0691624	0.0859773	1.00698	0.0305519	0.0032497	0.0223151	0.0568815
SPC24	2.21426e-41	0.528093	0.722	0.502	4.42851e-38	0.566249	0.0923761	0.0178328	0.00399746	0.0532578	0.113	0.800057	0.0958546	0.0335249	0.0626816	0.00707812
SPC25	2.04714e-45	0.914667	0.708	0.351	4.09427e-42	0.993791	0.160731	0.00843717	0.016752	0.0134723	0.0397263	1.5531	0.0618985	0.00778423	0.00413307	0.000178502
SPDL1	1.48315e-35	1.16389	0.756	0.46	2.96629e-32	2.73802	1.03746	0.527891	0.621875	1.20409	0.844732	3.52411	0.632988	0.269406	0.351869	0.337484
SRPX2	1.93842e-07	0.274688	0.675	0.569	0.000387685	0.0516915	0.147362	0.0368561	0.0411392	0.00464217	0.106434	1.20591	1.25089	0.600564	0.227179	0.652478
STC1	4.40938e-07	0.272341	0.9	0.791	0.000881876	3.08595	9.76929	2.66624	4.70811	1.5881	9.01986	13.942	16.2958	8.16702	1.50996	53.0622
STMN1	1.43591e-95	1.8052	0.981	0.676	2.87183e-92	8.25842	5.87235	1.33019	1.49196	1.17009	1.43842	12.3521	2.08081	0.794321	0.806921	0.795774
SYNE2	6.47519e-45	1.0162	0.88	0.594	1.29504e-41	7.03782	8.42837	9.90333	23.9415	8.86142	19.6772	4.16106	0.708768	1.06193	0.803935	1.13546
TACC3	3.30707e-91	1.18541	0.876	0.417	6.61414e-88	2.14395	0.39797	0.512054	0.118016	0.278335	0.0876343	2.47865	0.0929477	0.0794971	0.0291414	0.00426902
THBS1	6.1219e-23	0.251457	0.694	0.437	1.22438e-19	0.0587035	0.0176198	0.0146443	0.0616955	0.0193822	0.171148	0.803623	0.63436	0.268514	0.243637	0.943273
TK1	9.88425e-97	1.08271	0.895	0.436	1.97685e-93	1.69037	0.454861	1.0871	0.137882	0.294208	0.230457	2.21781	0.117669	0.0749946	0.087056	0.0187369
TMEM97	1.19011e-38	0.821033	0.804	0.591	2.38022e-35	0.738886	0.403903	0.194358	0.181336	0.231761	0.0758139	1.98962	0.562956	0.111026	0.264166	0.397632
TMPO	2.62708e-79	1.52733	0.871	0.405	5.25417e-76	4.30932	2.07122	1.91406	1.3244	1.10141	1.15079	4.74941	0.430853	0.18452	0.143297	0.225874
TNFAIP6	1.36061e-06	0.261205	0.871	0.757	0.00272122	0.0917588	0.0269282	0.143718	0.0747978	0.0886114	0.419699	2.19163	1.10085	2.03216	1.19001	2.0456
TNFAIP8L1	4.77761e-29	0.41065	0.67	0.425	9.55522e-26	0.956855	0.192307	3.56351	0.071197	0.0576293	0.0338306	0.663083	0.169611	0.0731134	0.0450344	0.293047
TOP2A	8.05983e-109	2.81228	0.967	0.574	1.61197e-105	12.4683	3.39331	3.22008	0.390646	0.472894	1.38637	23.0382	0.930552	0.260872	0.204386	0.163104
TPX2	4.8948e-78	1.95716	0.88	0.457	9.78959e-75	4.53599	1.07656	0.877071	0.208735	0.316687	0.312337	7.83797	0.433137	0.188647	0.162006	0.039978
TRIP13	1.16063e-22	0.426147	0.641	0.48	2.32126e-19	0.472772	0.151214	0.596895	0.0297877	0.030058	0.0542432	0.584516	0.0520433	0.0309735	0.0253565	0.0119799
TTK	1.36541e-68	1.00877	0.77	0.338	2.73082e-65	1.13091	0.184531	0.420766	0.0173241	0.0638716	0.00789442	1.84121	0.0832516	0.0307769	0.00214539	0.00575371
TUBA1A	1.82951e-05	0.472919	0.904	0.858	0.0365902	1.2068	1.32195	11.0634	0.89173	0.873793	1.1747	6.12751	2.59019	3.29014	4.45692	2.59331
TUBA1B	1.90374e-85	1.56245	0.986	0.863	3.80748e-82	17.416	8.76243	5.16554	3.12649	2.90739	3.14857	22.6622	4.62066	3.58375	3.86861	2.65676
TUBA1C	1.78607e-50	1.17239	0.909	0.69	3.57214e-47	5.80965	2.18287	1.40248	1.63151	1.61758	1.67183	5.75055	1.27607	1.05225	0.992612	0.806937
TUBB	4.41054e-49	1.10049	0.962	0.886	8.82108e-46	9.63859	5.4909	1.53366	2.66858	1.8649	2.61643	14.4597	4.07315	3.92583	4.19125	5.78079
TUBB4B	5.19446e-48	1.02824	0.962	0.748	1.03889e-44	6.70901	3.58592	17.563	2.79131	2.3205	3.09539	6.06116	1.8877	1.24675	1.31856	2.52548
TYMS	3.98549e-81	0.976463	0.823	0.403	7.97098e-78	1.20939	0.257667	0.178948	0.0811127	0.0548604	0.0531948	1.84492	0.184444	0.0333849	0.0103361	0.0194151
UBE2C	1.35742e-89	1.25482	0.856	0.458	2.71484e-86	1.13035	0.175344	0.154227	0.0215031	0.0539896	0.0618882	2.6506	0.0698069	0.0281993	0.0305588	0.00653719
UBE2T	8.38951e-60	1.38059	0.804	0.512	1.6779e-56	2.0251	0.532997	0.645928	0.115367	0.152462	0.0664696	3.52093	0.24758	0.048148	0.123183	0.0799481
USP13	3.11391e-16	0.500439	0.641	0.525	6.22781e-13	0.172157	0.0455425	1.04297	0.0224279	0.00754418	0.041743	0.910525	0.223016	0.0903379	0.140391	0.315708
VGF	1.72395e-14	0.303504	0.828	0.737	3.4479e-11	0.123429	0.294806	0.0188741	0.0665432	0.0331057	0.202222	2.41379	2.64226	0.741525	1.34574	0.421551
VRK1	3.71967e-40	0.640298	0.746	0.533	7.43935e-37	1.09139	0.640309	0.812312	0.172186	0.404679	0.08868	1.13053	0.194822	0.115126	0.0746627	0.0508601
WDHD1	2.39002e-53	0.371505	0.732	0.401	4.78005e-50	0.718759	0.407254	-0.0102194	0.0442811	0.0518066	0.102876	0.546757	0.0858485	0.0810121	0.0273774	0.139915
ZNF367	2.89373e-30	0.253374	0.569	0.295	5.78746e-27	0.227946	0.0158129	0.0309722	2.99978e-05	0.00364342	0.0113067	0.308491	0.0461859	0.00062961	0.00383585	-0.00298884
ZWILCH	2.5874e-45	0.917449	0.775	0.486	5.17479e-42	0.924218	0.444357	0.126838	0.143989	0.126417	0.128406	1.88342	0.23793	0.117252	0.106502	0.144766
ZWINT	3.7939e-32	0.846702	0.689	0.403	7.58779e-29	1.77637	0.485066	0.0373001	0.0561723	0.165267	0.0546769	1.51899	0.204436	0.0295064	0.0262772	-0.0198151
[truncated: 56 more columns]
