# Supplementary material for: Modelling the impact of decidual senescence on embryo implantation in human endometrial assembloids
Source: eLife. 2021 Sep 6;10:e69603. doi: 10.7554/eLife.69603 (PMC8523170; doi:10.7554/eLife.69603)
Supplement: Figure 4—source data 1. — Ligand-receptor interactions were predicted using CellPhoneDB on counts data from Seurat v3. [file elife-69603-fig4-data1.xlsx]

## Sheet: Figure 4-Source Data 1
Figure 4-Source Data 1: CellPhone DB prediction of cell-cell interactions
Ligand-receptor interactions were predicted using CellPhoneDB on counts data from Seurat v3
A. CellphoneDB means of predicted ligand-receptor interactions																																																B. CellphoneDB p-values of predicted ligand-receptor interactions
ID_cp_interaction	Interacting_pair	Partner_a	Partner_b	Gene_a	Gene_b	Secreted	Receptor_a	Receptor_b	Annotation_strategy	Is_integrin	Cell-cell interaction																																					Id_cp_interaction	Interacting_pair
											EpS4|EpS4	EpS4|EpS5	EpS4|TP	EpS4|SS3	EpS4|SS4	EpS4|SS5	EpS5|EpS4	EpS5|EpS5	EpS5|TP	EpS5|SS3	EpS5|SS4	EpS5|SS5	TP|EpS4	TP|EpS5	TP|TP	TP|SS3	TP|SS4	TP|SS5	SS3|EpS4	SS3|EpS5	SS3|TP	SS3|SS3	SS3|SS4	SS3|SS5	SS4|EpS4	SS4|EpS5	SS4|TP	SS4|SS3	SS4|SS4	SS4|SS5	SS5|EpS4	SS5|EpS5	SS5|TP	SS5|SS3	SS5|SS4	SS5|SS5
CPI-SS028784FC6	HLA-DPA1_TNFSF9	simple:HLADPA1	simple:P41273	HLA-DPA1	TNFSF9	TRUE	TRUE	FALSE	InnateDB-All	FALSE	0.22	0.255	0.208	0	0	0.12	0.197	0.232	0.186	0	0	0.097	0.189	0.225	0.178	0	0	0.089	0.172	0.207	0.161	0	0	0.072	0.131	0.166	0.119	0	0	0.031	0.211	0.247	0.2	0	0	0.111		CPI-SS0A8627ED6	PVR_CD226
CPI-SS00A8596B5	PVR_TNFSF9	simple:P15151	simple:P41273	PVR	TNFSF9	TRUE	TRUE	FALSE	InnateDB-All	FALSE	0.348	0.383	0.337	0	0	0.248	0.471	0.506	0.459	0	0	0.371	0.373	0.408	0.361	0	0	0.273	0.342	0.377	0.33	0	0	0.241	0.443	0.478	0.432	0	0	0.343	0.403	0.438	0.392	0	0	0.303		CPI-SS0F1A060D4	PVR_NECTIN3
CPI-SS072B19293	HLA-DPA1_GAL	simple:HLADPA1	simple:P22466	HLA-DPA1	GAL	TRUE	TRUE	FALSE	InnateDB-All	FALSE	0.112	0.111	0.109	0.15	0.145	0.118	0.089	0.088	0.086	0.127	0.122	0.096	0.081	0.081	0.079	0.119	0.114	0.088	0.064	0.064	0.062	0.102	0.097	0.071	0.023	0.022	0.02	0.06	0.056	0.029	0.104	0.103	0.101	0.141	0.136	0.11		CPI-SS0B990492C	CADM1_NECTIN3
CPI-SS0A8627ED6	PVR_CD226	simple:P15151	simple:Q15762	PVR	CD226	TRUE	TRUE	TRUE	curated	FALSE	0.24	0	0	0.305	0.286	0.235	0.363	0	0	0.428	0.409	0.358	0.265	0	0	0.33	0.311	0.26	0.234	0	0	0.298	0.28	0.229	0.335	0	0	0.4	0.382	0.33	0.295	0	0	0.36	0.341	0.29		CPI-SS0C5E9FBFB	NECTIN1_NECTIN3
CPI-SS0F1A060D4	PVR_NECTIN3	simple:P15151	simple:Q9NQS3	PVR	NECTIN3	TRUE	TRUE	FALSE	curated	FALSE	0.426	0.459	0.345	0.399	0.271	0.384	0.549	0.582	0.468	0.522	0.394	0.506	0.451	0.483	0.37	0.424	0.296	0.408	0.42	0.452	0.339	0.393	0.265	0.377	0.521	0.554	0.44	0.494	0.367	0.479	0.481	0.514	0.4	0.454	0.326	0.438		CPI-SS02FBD007E	NECTIN2_NECTIN3
CPI-SS0B990492C	CADM1_NECTIN3	simple:Q9BY67	simple:Q9NQS3	CADM1	NECTIN3	FALSE	FALSE	FALSE	curated	FALSE	1.395	1.428	1.314	1.368	1.241	1.353	0.869	0.902	0.788	0.842	0.715	0.827	0.825	0.858	0.744	0.798	0.67	0.783	0.282	0.315	0.201	0.255	0.127	0.239	0.294	0.327	0.213	0.267	0.14	0.252	0.338	0.371	0.257	0.311	0.183	0.295		CPI-SS0889E281D	CADM1_CADM1
CPI-SS0C5E9FBFB	NECTIN1_NECTIN3	simple:Q15223	simple:Q9NQS3	NECTIN1	NECTIN3	TRUE	TRUE	FALSE	curated	FALSE	0.228	0.261	0.147	0.201	0.073	0.186	0.258	0.29	0.177	0.231	0.103	0.215	0.217	0.25	0.136	0.19	0.062	0.175	0.219	0.252	0.138	0.192	0.065	0.177	0.203	0.236	0.122	0.176	0.049	0.161	0.225	0.258	0.144	0.198	0.07	0.182		CPI-SS01E0F2D2C	NECTIN1_NECTIN4
CPI-SS02FBD007E	NECTIN2_NECTIN3	simple:Q92692	simple:Q9NQS3	NECTIN2	NECTIN3	FALSE	TRUE	FALSE	curated	FALSE	0.485	0.518	0.404	0.458	0.33	0.442	0.806	0.839	0.725	0.779	0.651	0.763	0.665	0.697	0.584	0.638	0.51	0.622	0.836	0.868	0.755	0.809	0.681	0.793	0.68	0.713	0.599	0.653	0.526	0.638	0.519	0.552	0.438	0.492	0.364	0.477		CPI-SS06207F70E	CD226_NECTIN2
CPI-SS0889E281D	CADM1_CADM1	simple:Q9BY67	simple:Q9BY67	CADM1	CADM1	FALSE	FALSE	FALSE	curated	FALSE	2.395	1.869	1.825	1.282	1.294	1.338	1.869	1.343	1.299	0.756	0.768	0.812	1.825	1.299	1.255	0.711	0.724	0.767	1.282	0.756	0.711	0.168	0.181	0.224	1.294	0.768	0.724	0.181	0.193	0.237	1.338	0.812	0.767	0.224	0.237	0.28		CPI-SS03DA2A820	FGF2_CD44
CPI-SS01E0F2D2C	NECTIN1_NECTIN4	simple:Q15223	simple:Q96NY8	NECTIN1	NECTIN4	TRUE	TRUE	TRUE	curated	FALSE	0.372	0.491	0.212	0.048	0	0	0.402	0.52	0.242	0.078	0	0	0.361	0.48	0.201	0.037	0	0	0.363	0.482	0.203	0.04	0	0	0.347	0.466	0.187	0.024	0	0	0.369	0.487	0.209	0.045	0	0		CPI-SS02AB0C3E0	SPP1_CD44
CPI-SS06207F70E	CD226_NECTIN2	simple:Q15762	simple:Q92692	CD226	NECTIN2	FALSE	TRUE	TRUE	curated	FALSE	0.299	0.62	0.479	0.65	0.494	0.333	0	0	0	0	0	0	0	0	0	0	0	0	0.364	0.685	0.543	0.714	0.559	0.398	0.345	0.666	0.525	0.696	0.541	0.379	0.294	0.615	0.474	0.645	0.489	0.328		CPI-SS0703338F5	LGALS9_CD44
CPI-SS03DA2A820	FGF2_CD44	simple:P09038	simple:P16070	FGF2	CD44	TRUE	FALSE	TRUE	I2D,InnateDB-All	FALSE	0.801	0.951	0.924	1.782	1.226	2.508	0.835	0.985	0.958	1.816	1.26	2.542	1.109	1.259	1.232	2.091	1.535	2.817	1.662	1.813	1.786	2.644	2.088	3.37	1.106	1.256	1.229	2.087	1.531	2.813	3.045	3.196	3.169	4.027	3.471	4.753		CPI-SS03722104E	HGF_CD44
CPI-SS02AB0C3E0	SPP1_CD44	simple:P10451	simple:P16070	SPP1	CD44	TRUE	FALSE	TRUE	I2D,IMEx,InnateDB-All,IntAct	FALSE	3.283	3.433	3.406	4.265	3.709	4.991	1.701	1.851	1.824	2.682	2.126	3.408	1.25	1.4	1.373	2.232	1.676	2.958	1.086	1.236	1.209	2.067	1.511	2.793	0.966	1.117	1.09	1.948	1.392	2.674	0.87	1.021	0.994	1.852	1.296	2.578		CPI-SS008FB916C	FGF2_FGFR4
CPI-SS0703338F5	LGALS9_CD44	simple:O00182	simple:P16070	LGALS9	CD44	TRUE	FALSE	TRUE	InnateDB	FALSE	0.894	1.044	1.017	1.875	1.319	2.601	0.981	1.131	1.104	1.963	1.407	2.689	0.89	1.041	1.014	1.872	1.316	2.598	0.979	1.13	1.103	1.961	1.405	2.687	1.279	1.429	1.402	2.26	1.704	2.986	0.895	1.045	1.018	1.877	1.321	2.602		CPI-SS044CF7EAE	TNFRSF10A_FGFR4
CPI-SS03722104E	HGF_CD44	simple:P14210	simple:P16070	HGF	CD44	TRUE	FALSE	TRUE	IMEx,InnateDB-All,IntAct	FALSE	0.784	0.934	0.907	1.766	1.21	2.492	0	0	0	0	0	0	0.797	0.947	0.92	1.779	1.223	2.505	0.843	0.993	0.966	1.824	1.268	2.55	0.786	0.936	0.909	1.768	1.212	2.493	1.44	1.59	1.563	2.422	1.866	3.148		CPI-SS0D4CA5D92	FGF18_FGFR4
CPI-SS008FB916C	FGF2_FGFR4	simple:P09038	simple:P22455	FGF2	FGFR4	TRUE	FALSE	TRUE	curated	FALSE	0.028	0	0	0	0	0	0.062	0	0	0	0	0	0.337	0	0	0	0	0	0.89	0	0	0	0	0	0.333	0	0	0	0	0	2.273	0	0	0	0	0		CPI-SS0D95D41D6	FGF7_FGFR4
CPI-SS044CF7EAE	TNFRSF10A_FGFR4	simple:O00220	simple:P22455	TNFRSF10A	FGFR4	TRUE	TRUE	TRUE	InnateDB-All	FALSE	0.135	0	0	0	0	0	0.194	0	0	0	0	0	0.193	0	0	0	0	0	0.033	0	0	0	0	0	0	0	0	0	0	0	0.035	0	0	0	0	0		CPI-SS01F67987A	FGF2_FGFR1
CPI-SS0D4CA5D92	FGF18_FGFR4	simple:O76093	simple:P22455	FGF18	FGFR4	TRUE	FALSE	TRUE	I2D	FALSE	0.705	0	0	0	0	0	0.768	0	0	0	0	0	0.512	0	0	0	0	0	0.033	0	0	0	0	0	0.024	0	0	0	0	0	0.038	0	0	0	0	0		CPI-SS0F2C6A4D4	FGF18_FGFR1
CPI-SS0D95D41D6	FGF7_FGFR4	simple:P21781	simple:P22455	FGF7	FGFR4	TRUE	FALSE	TRUE	I2D	FALSE	0.052	0	0	0	0	0	0.015	0	0	0	0	0	0.118	0	0	0	0	0	0.318	0	0	0	0	0	0.354	0	0	0	0	0	1.146	0	0	0	0	0		CPI-SS05A94DE17	FGF2_FGFR2
CPI-SS01F67987A	FGF2_FGFR1	simple:P09038	simple:P11362	FGF2	FGFR1	TRUE	FALSE	TRUE	curated	FALSE	0.429	0.111	0.335	0.619	0.408	1.095	0.463	0.145	0.369	0.653	0.442	1.129	0.738	0.42	0.643	0.927	0.717	1.404	1.291	0.973	1.197	1.48	1.27	1.957	0.734	0.416	0.64	0.924	0.713	1.4	2.674	2.356	2.58	2.863	2.653	3.34		CPI-SS06B86672A	CD44_FGFR2
CPI-SS0F2C6A4D4	FGF18_FGFR1	simple:O76093	simple:P11362	FGF18	FGFR1	TRUE	FALSE	TRUE	I2D	FALSE	1.106	0.788	1.012	1.296	1.085	1.772	1.17	0.851	1.075	1.359	1.149	1.835	0.913	0.595	0.819	1.102	0.892	1.579	0.434	0.116	0.34	0.624	0.413	1.1	0.425	0.106	0.33	0.614	0.404	1.09	0.439	0.12	0.344	0.628	0.418	1.104		CPI-SS0F6A7A4DF	FGF18_FGFR2
CPI-SS05A94DE17	FGF2_FGFR2	simple:P09038	simple:P21802	FGF2	FGFR2	TRUE	FALSE	TRUE	curated	FALSE	0.228	0.076	0.2	0.027	0	0.059	0.263	0.11	0.234	0.061	0	0.093	0.537	0.384	0.508	0.335	0	0.367	1.09	0.937	1.062	0.889	0	0.92	0.533	0.381	0.505	0.332	0	0.364	2.473	2.321	2.445	2.272	0	2.304		CPI-SS0E928B8C8	FGF7_FGFR2
CPI-SS06B86672A	CD44_FGFR2	simple:P16070	simple:P21802	CD44	FGFR2	TRUE	TRUE	TRUE	InnateDB-All	FALSE	0.985	0.832	0.956	0.783	0	0.815	1.135	0.982	1.107	0.934	0	0.965	1.108	0.955	1.08	0.907	0	0.938	1.967	1.814	1.938	1.765	0	1.797	1.411	1.258	1.382	1.209	0	1.241	2.692	2.54	2.664	2.491	0	2.523		CPI-SS0735F5C3A	TIMP1_FGFR2
CPI-SS0F6A7A4DF	FGF18_FGFR2	simple:O76093	simple:P21802	FGF18	FGFR2	TRUE	FALSE	TRUE	I2D	FALSE	0.905	0.753	0.877	0.704	0	0.736	0.969	0.816	0.94	0.767	0	0.799	0.712	0.559	0.683	0.511	0	0.542	0.233	0.081	0.205	0.032	0	0.064	0.224	0.071	0.195	0.022	0	0.054	0.238	0.085	0.209	0.036	0	0.068		CPI-SS04640F9C3	TFF1_FGFR2
CPI-SS0E928B8C8	FGF7_FGFR2	simple:P21781	simple:P21802	FGF7	FGFR2	TRUE	FALSE	TRUE	I2D,IMEx,InnateDB-All,IntAct	FALSE	0.252	0.1	0.224	0.051	0	0.083	0.215	0.063	0.187	0.014	0	0.046	0.318	0.165	0.29	0.117	0	0.148	0.518	0.365	0.489	0.316	0	0.348	0.554	0.401	0.525	0.352	0	0.384	1.346	1.193	1.317	1.145	0	1.176		CPI-SS0DC322B61	ROS1_FGFR2
CPI-SS0735F5C3A	TIMP1_FGFR2	simple:P01033	simple:P21802	TIMP1	FGFR2	TRUE	FALSE	TRUE	InnateDB-All	FALSE	1.775	1.622	1.746	1.573	0	1.605	1.869	1.717	1.841	1.668	0	1.7	4.956	4.803	4.927	4.754	0	4.786	22.517	22.364	22.488	22.315	0	22.347	21.02	20.867	20.991	20.818	0	20.85	12.895	12.743	12.867	12.694	0	12.726		CPI-SS0348DB5E3	FGFR1_FGFR2
CPI-SS04640F9C3	TFF1_FGFR2	simple:P04155	simple:P21802	TFF1	FGFR2	TRUE	FALSE	TRUE	IMEx,InnateDB-All,MINT	FALSE	0.271	0.119	0.243	0.07	0	0.102	0.405	0.252	0.376	0.203	0	0.235	0.252	0.099	0.223	0.05	0	0.082	0	0	0	0	0	0	0	0	0	0	0	0	0	0	0	0	0	0		CPI-SS0D636A374	FGF2_FGFR3
CPI-SS0DC322B61	ROS1_FGFR2	simple:P08922	simple:P21802	ROS1	FGFR2	TRUE	TRUE	TRUE	I2D	FALSE	0.216	0.063	0.187	0.014	0	0.046	0	0	0	0	0	0	0.242	0.089	0.213	0.04	0	0.072	0.251	0.098	0.223	0.05	0	0.081	0.234	0.081	0.205	0.032	0	0.064	0.317	0.164	0.288	0.116	0	0.147		CPI-SS0E134097C	FGF18_FGFR3
CPI-SS0348DB5E3	FGFR1_FGFR2	simple:P11362	simple:P21802	FGFR1	FGFR2	TRUE	TRUE	TRUE	InnateDB-All	FALSE	0.614	0.461	0.585	0.412	0	0.444	0.295	0.143	0.267	0.094	0	0.126	0.519	0.366	0.491	0.318	0	0.349	0.803	0.65	0.774	0.601	0	0.633	0.593	0.44	0.564	0.391	0	0.423	1.279	1.127	1.251	1.078	0	1.11		CPI-SS00E68BB92	FGF7_FGFR3
CPI-SS0D636A374	FGF2_FGFR3	simple:P09038	simple:P22607	FGF2	FGFR3	TRUE	FALSE	TRUE	curated	FALSE	0.029	0.154	0.145	0.028	0	0.04	0.063	0.188	0.179	0.062	0	0.074	0.338	0.462	0.454	0.337	0	0.348	0.891	1.015	1.007	0.89	0	0.902	0.334	0.459	0.45	0.333	0	0.345	2.274	2.398	2.39	2.273	0	2.285		CPI-SS0BF3ED143	FGFR2_FGFR3
CPI-SS0E134097C	FGF18_FGFR3	simple:O76093	simple:P22607	FGF18	FGFR3	TRUE	FALSE	TRUE	I2D	FALSE	0.706	0.831	0.822	0.705	0	0.717	0.77	0.894	0.885	0.768	0	0.78	0.513	0.637	0.629	0.512	0	0.523	0.034	0.159	0.15	0.033	0	0.045	0.025	0.149	0.14	0.023	0	0.035	0.039	0.163	0.154	0.038	0	0.049		CPI-SS0CB6968B9	FGF2_FGFRL1
CPI-SS00E68BB92	FGF7_FGFR3	simple:P21781	simple:P22607	FGF7	FGFR3	TRUE	FALSE	TRUE	I2D	FALSE	0.053	0.177	0.169	0.052	0	0.064	0.016	0.141	0.132	0.015	0	0.027	0.119	0.243	0.235	0.118	0	0.129	0.319	0.443	0.435	0.318	0	0.329	0.355	0.479	0.471	0.354	0	0.365	1.147	1.271	1.263	1.146	0	1.157		CPI-SS0C1BD22BC	SPP1_PTGER4
CPI-SS0BF3ED143	FGFR2_FGFR3	simple:P21802	simple:P22607	FGFR2	FGFR3	TRUE	TRUE	TRUE	IMEx,InnateDB-All	FALSE	0.213	0.338	0.329	0.212	0	0.224	0.061	0.185	0.177	0.06	0	0.071	0.185	0.309	0.301	0.184	0	0.195	0.012	0.136	0.128	0.011	0	0.023	0	0	0	0	0	0	0.044	0.168	0.16	0.043	0	0.054		CPI-SS085EE60B1	TGFB1_TGFBR3
CPI-SS0CB6968B9	FGF2_FGFRL1	simple:P09038	simple:Q8N441	FGF2	FGFRL1	TRUE	FALSE	TRUE	I2D	FALSE	0.141	0.199	0.108	0.04	0.099	0.028	0.175	0.233	0.142	0.074	0.133	0.062	0.45	0.508	0.416	0.348	0.407	0.337	1.003	1.061	0.969	0.902	0.96	0.89	0.446	0.504	0.413	0.345	0.403	0.333	2.386	2.444	2.352	2.285	2.343	2.273		CPI-SS0FB37E079	INHA_TGFBR3
CPI-SS0C1BD22BC	SPP1_PTGER4	simple:P10451	simple:P35408	SPP1	PTGER4	TRUE	FALSE	TRUE	IMEx,MINT	FALSE	0	2.509	0	0	0	2.542	0	0.927	0	0	0	0.959	0	0.476	0	0	0	0.509	0	0.312	0	0	0	0.344	0	0.193	0	0	0	0.225	0	0.097	0	0	0	0.129		CPI-SS0D46E2B45	TGFB3_TGFBR3
CPI-SS085EE60B1	TGFB1_TGFBR3	simple:P01137	simple:Q03167	TGFB1	TGFBR3	TRUE	FALSE	TRUE	curated	FALSE	0.057	0.031	0.096	0.048	0.081	0	0.052	0.027	0.092	0.043	0.077	0	0.085	0.059	0.124	0.076	0.109	0	0.169	0.143	0.208	0.16	0.193	0	0.078	0.052	0.117	0.069	0.102	0	0.049	0.024	0.089	0.04	0.074	0		CPI-SS0178F5C45	TGFB2_TGFBR3
CPI-SS0FB37E079	INHA_TGFBR3	simple:P05111	simple:Q03167	INHA	TGFBR3	TRUE	FALSE	TRUE	I2D	FALSE	0.035	0.009	0.074	0.026	0.059	0	0	0	0	0	0	0	0.048	0.022	0.087	0.039	0.072	0	0.133	0.107	0.172	0.124	0.157	0	0.088	0.062	0.127	0.079	0.112	0	0.061	0.036	0.101	0.053	0.086	0		CPI-SS0ACD487F0	L1CAM_L1CAM
CPI-SS0D46E2B45	TGFB3_TGFBR3	simple:P10600	simple:Q03167	TGFB3	TGFBR3	TRUE	FALSE	TRUE	curated	FALSE	0.037	0.011	0.076	0.028	0.061	0	0.034	0.008	0.073	0.025	0.058	0	0	0	0	0	0	0	0.039	0.013	0.078	0.03	0.063	0	0.06	0.035	0.099	0.051	0.084	0	0.068	0.043	0.108	0.059	0.093	0		CPI-SS087B53ABF	JAM2_JAM3
CPI-SS0178F5C45	TGFB2_TGFBR3	simple:P61812	simple:Q03167	TGFB2	TGFBR3	TRUE	FALSE	TRUE	curated	FALSE	0.093	0.067	0.132	0.084	0.117	0	0.058	0.033	0.098	0.05	0.083	0	0.064	0.039	0.104	0.056	0.089	0	0.087	0.062	0.126	0.078	0.112	0	0	0	0	0	0	0	0	0	0	0	0	0		CPI-SS0F9D53834	JAM3_JAM3
CPI-SS0ACD487F0	L1CAM_L1CAM	simple:P32004	simple:P32004	L1CAM	L1CAM	FALSE	FALSE	FALSE	curated	FALSE	0.004	0.054	0.105	0.014	0	0.038	0.054	0.104	0.156	0.065	0	0.088	0.105	0.156	0.207	0.116	0	0.139	0.014	0.065	0.116	0.025	0	0.048	0	0	0	0	0	0	0.038	0.088	0.139	0.048	0	0.072		CPI-SS034D36D2F	HLA-C_FAM3C
CPI-SS087B53ABF	JAM2_JAM3	simple:P57087	simple:Q9BX67	JAM2	JAM3	TRUE	FALSE	FALSE	curated	FALSE	0.016	0	0.04	0.263	0.239	0.318	0	0	0	0	0	0	0.041	0	0.065	0.288	0.264	0.343	0.103	0	0.127	0.35	0.326	0.405	0	0	0	0	0	0	0.452	0	0.476	0.699	0.675	0.754		CPI-SS055E061C9	LAMP1_FAM3C
CPI-SS0F9D53834	JAM3_JAM3	simple:Q9BX67	simple:Q9BX67	JAM3	JAM3	TRUE	FALSE	FALSE	curated	FALSE	0.023	0	0.046	0.269	0.246	0.325	0	0	0	0	0	0	0.046	0	0.07	0.293	0.269	0.348	0.269	0	0.293	0.516	0.492	0.571	0.246	0	0.269	0.492	0.469	0.548	0.325	0	0.348	0.571	0.548	0.626		CPI-SS033CB0BB2	CXADR_FAM3C
CPI-SS034D36D2F	HLA-C_FAM3C	simple:HLAC	simple:Q92520	HLA-C	FAM3C	TRUE	TRUE	FALSE	InnateDB-All	FALSE	2.852	2.917	2.76	2.669	2.736	2.706	5.398	5.464	5.307	5.215	5.283	5.252	3.159	3.224	3.067	2.976	3.044	3.013	7.964	8.029	7.872	7.781	7.848	7.817	12.046	12.112	11.955	11.863	11.931	11.9	6.565	6.631	6.473	6.382	6.45	6.419		CPI-SS0B02DE712	EGFR_NRG1
CPI-SS055E061C9	LAMP1_FAM3C	simple:P11279	simple:Q92520	LAMP1	FAM3C	TRUE	TRUE	FALSE	InnateDB-All	FALSE	1.371	1.436	1.279	1.188	1.255	1.225	1.137	1.202	1.045	0.954	1.021	0.991	1.162	1.227	1.07	0.979	1.047	1.016	1.802	1.867	1.71	1.619	1.686	1.655	1.772	1.837	1.68	1.589	1.657	1.626	1.222	1.288	1.13	1.039	1.107	1.076		CPI-SS076BC3BA6	HLA-DPB1_NRG1
CPI-SS033CB0BB2	CXADR_FAM3C	simple:P78310	simple:Q92520	CXADR	FAM3C	TRUE	TRUE	FALSE	IMEx,IntAct	FALSE	0.87	0.935	0.778	0.687	0.754	0.724	0.903	0.969	0.812	0.72	0.788	0.757	0.745	0.81	0.653	0.562	0.629	0.598	0.377	0.443	0.286	0.195	0.262	0.231	0.335	0.4	0.243	0.152	0.22	0.189	0.504	0.569	0.412	0.321	0.389	0.358		CPI-SS09375CA29	ADGRL1_NRG1
CPI-SS0B02DE712	EGFR_NRG1	simple:P00533	simple:Q02297	EGFR	NRG1	TRUE	TRUE	TRUE	I2D,IMEx,InnateDB-All,IntAct	FALSE	0	0	0.342	0.305	0	0.323	0	0	0.269	0.231	0	0.249	0	0	0.573	0.536	0	0.553	0	0	0.825	0.788	0	0.806	0	0	0.508	0.471	0	0.489	0	0	1.569	1.532	0	1.55		CPI-SS00A953C3A	EGF_NRG1
CPI-SS076BC3BA6	HLA-DPB1_NRG1	simple:HLADPB1	simple:Q02297	HLA-DPB1	NRG1	TRUE	TRUE	TRUE	InnateDB-All	FALSE	0	0	0.108	0.071	0	0.089	0	0	0.055	0.018	0	0.036	0	0	0.085	0.048	0	0.066	0	0	0.107	0.07	0	0.088	0	0	0.107	0.07	0	0.088	0	0	0.161	0.124	0	0.141		CPI-SS0BF9FA3F2	ERBB3_NRG1
CPI-SS09375CA29	ADGRL1_NRG1	simple:O94910	simple:Q02297	ADGRL1	NRG1	TRUE	TRUE	TRUE	InnateDB-All	FALSE	0	0	0.179	0.142	0	0.16	0	0	0.113	0.076	0	0.094	0	0	0.128	0.091	0	0.109	0	0	0.081	0.044	0	0.062	0	0	0.071	0.034	0	0.052	0	0	0.07	0.033	0	0.051		CPI-SS0F4D30D5A	EGFR_EGF
CPI-SS00A953C3A	EGF_NRG1	simple:P01133	simple:Q02297	EGF	NRG1	TRUE	FALSE	TRUE	I2D	FALSE	0	0	0	0	0	0	0	0	0.059	0.022	0	0.04	0	0	0.062	0.024	0	0.042	0	0	0	0	0	0	0	0	0	0	0	0	0	0	0	0	0	0		CPI-SS0E25CE362	EGFR_TGFA
CPI-SS0BF9FA3F2	ERBB3_NRG1	simple:P21860	simple:Q02297	ERBB3	NRG1	TRUE	TRUE	TRUE	curated	FALSE	0	0	0.518	0.48	0	0.498	0	0	0.422	0.385	0	0.403	0	0	0.412	0.375	0	0.393	0	0	0.076	0.039	0	0.057	0	0	0.05	0.013	0	0.031	0	0	0.099	0.062	0	0.08		CPI-SS0055264F3	EGFR_TGFB1
CPI-SS0F4D30D5A	EGFR_EGF	simple:P00533	simple:P01133	EGFR	EGF	TRUE	TRUE	FALSE	curated	FALSE	0	0.308	0.311	0	0	0	0	0.234	0.237	0	0	0	0	0.538	0.541	0	0	0	0	0.79	0.793	0	0	0	0	0.474	0.476	0	0	0	0	1.534	1.537	0	0	0		CPI-SS00EDDD458	EGFR_MIF
CPI-SS0E25CE362	EGFR_TGFA	simple:P00533	simple:P01135	EGFR	TGFA	TRUE	TRUE	FALSE	curated	FALSE	0.35	0.55	0.443	0.32	0	0.317	0.276	0.476	0.369	0.246	0	0.243	0.58	0.781	0.674	0.55	0	0.548	0.832	1.033	0.926	0.802	0	0.8	0.516	0.716	0.609	0.486	0	0.483	1.576	1.777	1.67	1.546	0	1.544		CPI-SS0ABC5C1B8	CD74_MIF
CPI-SS0055264F3	EGFR_TGFB1	simple:P00533	simple:P01137	EGFR	TGFB1	TRUE	TRUE	FALSE	IMEx,InnateDB-All,MINT	FALSE	0.321	0.317	0.349	0.433	0.342	0.314	0.247	0.243	0.275	0.359	0.268	0.24	0.551	0.547	0.579	0.664	0.573	0.544	0.803	0.799	0.831	0.916	0.825	0.796	0.487	0.482	0.515	0.599	0.508	0.479	1.547	1.543	1.575	1.66	1.569	1.54		CPI-SS0481D83A4	EGFR_AREG
CPI-SS00EDDD458	EGFR_MIF	simple:P00533	simple:P14174	EGFR	MIF	TRUE	TRUE	FALSE	IMEx,InnateDB-All	FALSE	0.45	0.58	0.331	0.384	0.328	0.451	0.376	0.506	0.257	0.31	0.254	0.377	0.681	0.81	0.561	0.614	0.559	0.682	0.933	1.062	0.813	0.867	0.811	0.934	0.616	0.746	0.497	0.55	0.494	0.617	1.677	1.806	1.557	1.61	1.555	1.678		CPI-SS0D4C221B8	ICAM1_AREG
CPI-SS0ABC5C1B8	CD74_MIF	simple:P04233	simple:P14174	CD74	MIF	TRUE	TRUE	FALSE	I2D,InnateDB-All	FALSE	2.905	3.035	2.786	2.839	2.783	2.906	2.031	2.16	1.911	1.965	1.909	2.032	1.527	1.656	1.407	1.461	1.405	1.528	0.34	0.469	0.22	0.273	0.218	0.341	0.289	0.419	0.169	0.223	0.167	0.29	0.397	0.526	0.277	0.331	0.275	0.398		CPI-SS08CA619FE	EGFR_GRN
CPI-SS0481D83A4	EGFR_AREG	simple:P00533	simple:P15514	EGFR	AREG	TRUE	TRUE	FALSE	curated	FALSE	0.607	2.781	1.143	0.452	0.319	0.81	0.533	2.708	1.069	0.378	0.245	0.736	0.837	3.012	1.373	0.683	0.55	1.04	1.089	3.264	1.625	0.935	0.802	1.292	0.772	2.947	1.309	0.618	0.485	0.976	1.833	4.008	2.369	1.679	1.546	2.036		CPI-SS0DA033F03	TNFRSF1A_GRN
CPI-SS0D4C221B8	ICAM1_AREG	simple:P05362	simple:P15514	ICAM1	AREG	TRUE	TRUE	FALSE	InnateDB-All	FALSE	0.447	2.622	0.984	0.293	0.16	0.651	0.449	2.624	0.985	0.295	0.162	0.653	0.572	2.747	1.109	0.418	0.285	0.776	0.502	2.677	1.038	0.348	0.215	0.706	0.338	2.513	0.874	0.184	0.051	0.541	1.763	3.938	2.299	1.608	1.475	1.966		CPI-SS054D158CC	NTRK1_GRN
CPI-SS08CA619FE	EGFR_GRN	simple:P00533	simple:P28799	EGFR	GRN	TRUE	TRUE	FALSE	InnateDB-All	FALSE	1.235	1.384	1.184	1.278	1.256	1.426	1.161	1.31	1.11	1.204	1.182	1.352	1.465	1.614	1.414	1.509	1.486	1.657	1.717	1.866	1.666	1.761	1.739	1.909	1.4	1.55	1.35	1.444	1.422	1.592	2.461	2.61	2.41	2.505	2.482	2.653		CPI-SS0C4E86714	TNFRSF1B_GRN
CPI-SS0DA033F03	TNFRSF1A_GRN	simple:P19438	simple:P28799	TNFRSF1A	GRN	TRUE	TRUE	FALSE	IMEx,InnateDB-All,MINT	FALSE	1.132	1.281	1.081	1.175	1.153	1.323	1.201	1.35	1.15	1.245	1.222	1.393	1.093	1.242	1.042	1.137	1.115	1.285	1.361	1.51	1.31	1.404	1.382	1.552	1.416	1.566	1.366	1.46	1.438	1.608	1.231	1.38	1.18	1.274	1.252	1.422		CPI-SS0A19E9C34	EGFR_BTC
CPI-SS054D158CC	NTRK1_GRN	simple:P04629	simple:P28799	NTRK1	GRN	TRUE	TRUE	FALSE	InnateDB-All	FALSE	0	0	0	0	0	0	0	0	0	0	0	0	0.948	1.097	0.898	0.992	0.97	1.14	1.059	1.209	1.009	1.103	1.081	1.251	1.109	1.258	1.058	1.153	1.13	1.301	0.962	1.112	0.912	1.006	0.984	1.154		CPI-SS06BC4D123	ERBB3_BTC
CPI-SS0C4E86714	TNFRSF1B_GRN	simple:P20333	simple:P28799	TNFRSF1B	GRN	TRUE	TRUE	FALSE	IMEx,InnateDB-All,MINT	FALSE	1.044	1.193	0.993	1.088	1.065	1.236	1.152	1.301	1.101	1.196	1.173	1.344	1.378	1.527	1.327	1.421	1.399	1.569	2.703	2.852	2.653	2.747	2.725	2.895	2.417	2.566	2.367	2.461	2.439	2.609	2.349	2.499	2.299	2.393	2.371	2.541		CPI-SS088A0A760	EGFR_COPA
CPI-SS0A19E9C34	EGFR_BTC	simple:P00533	simple:P35070	EGFR	BTC	TRUE	TRUE	FALSE	curated	FALSE	0.358	0.456	0.384	0.338	0.37	0.307	0.284	0.382	0.31	0.264	0.296	0.233	0.589	0.686	0.614	0.568	0.601	0.538	0.841	0.938	0.866	0.82	0.853	0.79	0.524	0.622	0.549	0.504	0.536	0.473	1.585	1.682	1.61	1.564	1.597	1.534		CPI-SS0302E8E8F	CD74_COPA
CPI-SS06BC4D123	ERBB3_BTC	simple:P21860	simple:P35070	ERBB3	BTC	TRUE	TRUE	FALSE	curated	FALSE	0.534	0.631	0.559	0.513	0.545	0.482	0.438	0.535	0.463	0.417	0.45	0.387	0.428	0.525	0.453	0.407	0.44	0.377	0.092	0.19	0.117	0.072	0.104	0.041	0.066	0.164	0.091	0.045	0.078	0.015	0.115	0.212	0.14	0.094	0.127	0.064		CPI-SS0E6E8A727	NTRK1_COPA
CPI-SS088A0A760	EGFR_COPA	simple:P00533	simple:P53621	EGFR	COPA	TRUE	TRUE	FALSE	InnateDB-All	FALSE	0.943	0.791	0.968	1.008	1.29	0.967	0.869	0.717	0.894	0.934	1.216	0.893	1.173	1.021	1.199	1.239	1.521	1.197	1.425	1.273	1.451	1.491	1.773	1.449	1.108	0.957	1.134	1.174	1.456	1.133	2.169	2.017	2.195	2.235	2.517	2.193		CPI-SS0C10824C7	EGFR_HBEGF
CPI-SS0302E8E8F	CD74_COPA	simple:P04233	simple:P53621	CD74	COPA	TRUE	TRUE	FALSE	IMEx,IntAct	FALSE	3.398	3.246	3.423	3.463	3.745	3.422	2.523	2.372	2.549	2.589	2.871	2.548	2.019	1.867	2.045	2.085	2.367	2.044	0.832	0.68	0.858	0.898	1.18	0.856	0.781	0.63	0.807	0.847	1.129	0.806	0.889	0.737	0.915	0.955	1.237	0.913		CPI-SS0632A027A	CD44_HBEGF
CPI-SS0E6E8A727	NTRK1_COPA	simple:P04629	simple:P53621	NTRK1	COPA	TRUE	TRUE	FALSE	InnateDB-All	FALSE	0	0	0	0	0	0	0	0	0	0	0	0	0.656	0.504	0.682	0.722	1.004	0.681	0.767	0.616	0.793	0.833	1.115	0.792	0.817	0.665	0.843	0.883	1.165	0.841	0.67	0.519	0.696	0.736	1.018	0.695		CPI-SS03098AC28	ERBB4_HBEGF
CPI-SS0C10824C7	EGFR_HBEGF	simple:P00533	simple:Q99075	EGFR	HBEGF	TRUE	TRUE	TRUE	curated	FALSE	0.364	0.42	0.347	0.332	0.331	0	0.29	0.346	0.273	0.258	0.257	0	0.595	0.651	0.577	0.562	0.561	0	0.847	0.903	0.829	0.814	0.813	0	0.53	0.586	0.513	0.497	0.497	0	1.591	1.647	1.573	1.558	1.557	0		CPI-SS05D23BCE8	HLA-DPB1_TNFSF13B
CPI-SS0632A027A	CD44_HBEGF	simple:P16070	simple:Q99075	CD44	HBEGF	TRUE	TRUE	TRUE	I2D,InnateDB-All	FALSE	0.847	0.903	0.83	0.814	0.814	0	0.997	1.053	0.98	0.965	0.964	0	0.97	1.026	0.953	0.938	0.937	0	1.829	1.885	1.811	1.796	1.795	0	1.273	1.329	1.255	1.24	1.239	0	2.555	2.611	2.537	2.522	2.521	0		CPI-SS03133B4F2	TFRC_TNFSF13B
CPI-SS03098AC28	ERBB4_HBEGF	simple:Q15303	simple:Q99075	ERBB4	HBEGF	TRUE	TRUE	TRUE	curated	FALSE	0.254	0.31	0.237	0.221	0.221	0	0.093	0.149	0.076	0.061	0.06	0	0.202	0.258	0.184	0.169	0.168	0	0.101	0.157	0.084	0.068	0.068	0	0.072	0.128	0.055	0.04	0.039	0	0	0	0	0	0	0		CPI-SS0F00D756A	CD40_TNFSF13B
CPI-SS05D23BCE8	HLA-DPB1_TNFSF13B	simple:HLADPB1	simple:Q9Y275	HLA-DPB1	TNFSF13B	TRUE	TRUE	FALSE	InnateDB-All	FALSE	0.066	0.084	0.092	0.072	0	0.076	0.013	0.031	0.04	0.02	0	0.023	0.042	0.061	0.069	0.049	0	0.053	0.065	0.083	0.092	0.072	0	0.075	0.065	0.083	0.091	0.071	0	0.075	0.118	0.137	0.145	0.125	0	0.129		CPI-SS09648FAA9	TNFRSF13C_TNFSF13B
CPI-SS03133B4F2	TFRC_TNFSF13B	simple:P02786	simple:Q9Y275	TFRC	TNFSF13B	TRUE	TRUE	FALSE	IMEx,IntAct	FALSE	0.707	0.725	0.734	0.714	0	0.717	0.43	0.448	0.457	0.437	0	0.44	0.501	0.519	0.528	0.508	0	0.512	0.313	0.331	0.34	0.32	0	0.323	0.517	0.535	0.544	0.524	0	0.527	0.381	0.4	0.408	0.388	0	0.392		CPI-SS09808DEAE	CD74_APP
CPI-SS0F00D756A	CD40_TNFSF13B	simple:P25942	simple:Q9Y275	CD40	TNFSF13B	TRUE	TRUE	FALSE	I2D,InnateDB	FALSE	0.029	0.047	0.056	0.036	0	0.04	0.024	0.042	0.051	0.031	0	0.034	0.02	0.039	0.047	0.027	0	0.031	0.018	0.036	0.045	0.025	0	0.029	0.03	0.048	0.057	0.037	0	0.04	0.039	0.058	0.066	0.046	0	0.05		CPI-SS0E9A581F8	ICAM1_ITGAL
CPI-SS09648FAA9	TNFRSF13C_TNFSF13B	simple:Q96RJ3	simple:Q9Y275	TNFRSF13C	TNFSF13B	TRUE	TRUE	FALSE	guidetopharmacology.org	FALSE	0.045	0.064	0.072	0.052	0	0.056	0.066	0.084	0.093	0.073	0	0.076	0.007	0.025	0.034	0.014	0	0.018	0	0	0	0	0	0	0	0	0	0	0	0	0	0	0	0	0	0		CPI-SS0B1AB068C	NTRK1_GPI
CPI-SS09808DEAE	CD74_APP	simple:P04233	simple:P05067	CD74	APP	FALSE	TRUE	FALSE	curated	FALSE	5.876	6.103	5.904	5.636	4.65	5.253	5.002	5.229	5.03	4.762	3.775	4.379	4.498	4.724	4.526	4.257	3.271	3.875	3.31	3.537	3.338	3.07	2.084	2.687	3.26	3.487	3.288	3.02	2.033	2.637	3.368	3.594	3.396	3.127	2.141	2.745		CPI-SS0391D4602	NTRK1_NAMPT
CPI-SS0E9A581F8	ICAM1_ITGAL	simple:P05362	simple:P20701	ICAM1	ITGAL	FALSE	TRUE	TRUE	curated	FALSE	0	0	0	0.137	0	0	0	0	0	0.139	0	0	0	0	0	0.262	0	0	0	0	0	0.192	0	0	0	0	0	0.028	0	0	0	0	0	1.452	0	0		CPI-SS05D1A6BEF	NTRK1_AIMP1
CPI-SS0B1AB068C	NTRK1_GPI	simple:P04629	simple:P06744	NTRK1	GPI	TRUE	TRUE	FALSE	InnateDB-All	FALSE	0	0	0	0	0	0	0	0	0	0	0	0	0.993	0.72	0.639	0.629	0.458	0.615	1.104	0.831	0.75	0.74	0.569	0.727	1.153	0.881	0.8	0.79	0.619	0.776	1.007	0.734	0.653	0.643	0.472	0.63		CPI-SS074CF011C	ERBB4_NRG4
CPI-SS0391D4602	NTRK1_NAMPT	simple:P04629	simple:P43490	NTRK1	NAMPT	TRUE	TRUE	FALSE	InnateDB-All	FALSE	0	0	0	0	0	0	0	0	0	0	0	0	0.788	0.481	1.151	0.685	0.598	2.133	0.899	0.593	1.262	0.796	0.709	2.244	0.948	0.642	1.312	0.845	0.758	2.293	0.802	0.496	1.165	0.699	0.612	2.147		CPI-SS0DE0A486F	NRP1_VEGFA
CPI-SS05D1A6BEF	NTRK1_AIMP1	simple:P04629	simple:Q12904	NTRK1	AIMP1	TRUE	TRUE	FALSE	InnateDB-All	FALSE	0	0	0	0	0	0	0	0	0	0	0	0	1.195	1.02	1.02	0.67	0.793	0.699	1.306	1.131	1.131	0.781	0.904	0.81	1.355	1.181	1.181	0.831	0.953	0.86	1.209	1.034	1.034	0.684	0.807	0.713		CPI-SS0E00478B4	NRP2_VEGFA
CPI-SS074CF011C	ERBB4_NRG4	simple:Q15303	simple:Q8WWG1	ERBB4	NRG4	TRUE	TRUE	FALSE	curated	FALSE	0.2	0	0.214	0.19	0	0	0.039	0	0.054	0.029	0	0	0.147	0	0.162	0.137	0	0	0.047	0	0.061	0.036	0	0	0.018	0	0.032	0.008	0	0	0	0	0	0	0	0		CPI-SS0855C0353	NRP1_PGF
CPI-SS0DE0A486F	NRP1_VEGFA	simple:O14786	simple:P15692	NRP1	VEGFA	TRUE	TRUE	FALSE	curated	FALSE	2.662	1.392	3.426	4.582	2.218	4.147	2.7	1.431	3.465	4.621	2.257	4.186	2.677	1.408	3.442	4.598	2.234	4.163	2.918	1.648	3.682	4.838	2.474	4.403	2.928	1.659	3.693	4.848	2.484	4.413	3.282	2.013	4.047	5.203	2.839	4.768		CPI-SS0D22A09AD	NRP2_PGF
CPI-SS0E00478B4	NRP2_VEGFA	simple:O60462	simple:P15692	NRP2	VEGFA	TRUE	TRUE	FALSE	curated	FALSE	2.683	1.414	3.448	4.604	2.24	4.169	2.934	1.665	3.699	4.855	2.49	4.419	2.772	1.503	3.537	4.693	2.329	4.258	2.64	1.37	3.404	4.56	2.196	4.125	0	0	0	0	0	0	2.778	1.509	3.543	4.699	2.335	4.264		CPI-SS0E61DB5DF	FLT1_PGF
CPI-SS0855C0353	NRP1_PGF	simple:O14786	simple:P49763	NRP1	PGF	TRUE	TRUE	FALSE	curated	FALSE	0.049	0	0	0	0	0	0.088	0	0	0	0	0	0.065	0	0	0	0	0	0.305	0	0	0	0	0	0.316	0	0	0	0	0	0.67	0	0	0	0	0		CPI-SS033E6DE7E	NRP1_VEGFB
CPI-SS0D22A09AD	NRP2_PGF	simple:O60462	simple:P49763	NRP2	PGF	TRUE	TRUE	FALSE	curated	FALSE	0.071	0	0	0	0	0	0.322	0	0	0	0	0	0.16	0	0	0	0	0	0.027	0	0	0	0	0	0	0	0	0	0	0	0.166	0	0	0	0	0		CPI-SS0947A8549	FLT1_VEGFB
CPI-SS0E61DB5DF	FLT1_PGF	simple:P17948	simple:P49763	FLT1	PGF	TRUE	TRUE	FALSE	curated	FALSE	0.026	0	0	0	0	0	0.012	0	0	0	0	0	0.052	0	0	0	0	0	0.008	0	0	0	0	0	0	0	0	0	0	0	0.072	0	0	0	0	0		CPI-SS098425155	ADRB2_VEGFB
CPI-SS033E6DE7E	NRP1_VEGFB	simple:O14786	simple:P49765	NRP1	VEGFB	TRUE	TRUE	FALSE	curated	FALSE	0.366	0.337	0.379	0.274	0.181	0.402	0.405	0.375	0.418	0.312	0.219	0.44	0.381	0.352	0.395	0.289	0.196	0.417	0.622	0.593	0.635	0.53	0.437	0.658	0.632	0.603	0.645	0.54	0.447	0.668	0.987	0.958	1	0.894	0.802	1.023		CPI-SS08083B141	NRP1_SEMA3A
CPI-SS0947A8549	FLT1_VEGFB	simple:P17948	simple:P49765	FLT1	VEGFB	TRUE	TRUE	FALSE	curated	FALSE	0.343	0.313	0.356	0.25	0.157	0.378	0.329	0.3	0.342	0.236	0.143	0.364	0.368	0.339	0.382	0.276	0.183	0.404	0.325	0.295	0.338	0.232	0.139	0.36	0	0	0	0	0	0	0.389	0.36	0.402	0.296	0.203	0.425		CPI-SS0F15C1AB3	NRP2_SEMA3F
CPI-SS098425155	ADRB2_VEGFB	simple:P07550	simple:P49765	ADRB2	VEGFB	TRUE	TRUE	FALSE	InnateDB-All	FALSE	0.32	0.291	0.333	0.228	0.135	0.356	0.322	0.292	0.335	0.229	0.136	0.357	0.328	0.299	0.341	0.236	0.143	0.364	0	0	0	0	0	0	0	0	0	0	0	0	0.327	0.298	0.341	0.235	0.142	0.363		CPI-SS0241A1F57	NRP2_SEMA3C
CPI-SS08083B141	NRP1_SEMA3A	simple:O14786	simple:Q14563	NRP1	SEMA3A	TRUE	TRUE	FALSE	curated	FALSE	0.141	0.183	0.165	0.062	0	0	0.18	0.222	0.204	0.1	0	0	0.156	0.198	0.18	0.077	0	0	0.397	0.439	0.421	0.318	0	0	0.407	0.449	0.431	0.328	0	0	0.762	0.804	0.786	0.682	0	0		CPI-SS03FA58286	TNF_VSIR
CPI-SS0F15C1AB3	NRP2_SEMA3F	simple:O60462	simple:Q13275	NRP2	SEMA3F	TRUE	TRUE	FALSE	curated	FALSE	0.137	0.121	0.113	0.083	0	0	0.388	0.372	0.364	0.334	0	0	0.226	0.21	0.202	0.173	0	0	0.093	0.078	0.069	0.04	0	0	0	0	0	0	0	0	0.232	0.216	0.208	0.179	0	0		CPI-SS03105D292	CSF1_SLC7A1
CPI-SS0241A1F57	NRP2_SEMA3C	simple:O60462	simple:Q99985	NRP2	SEMA3C	TRUE	TRUE	FALSE	curated	FALSE	0.467	0.755	0.755	0.287	0.496	0.146	0.718	1.006	1.006	0.538	0.747	0.397	0.556	0.845	0.844	0.376	0.585	0.235	0.423	0.712	0.711	0.244	0.452	0.102	0	0	0	0	0	0	0.562	0.85	0.85	0.382	0.591	0.241		CPI-SS0E41702C1	IGF1_IGF1R
CPI-SS03FA58286	TNF_VSIR	simple:P01375	simple:Q9H7M9	TNF	VSIR	TRUE	FALSE	TRUE	IMEx,IntAct	FALSE	0.194	0.215	0.19	0.204	0.214	0	0.453	0.475	0.45	0.463	0.474	0	0.262	0.284	0.259	0.272	0.283	0	0.015	0.037	0.012	0.025	0.036	0	0	0	0	0	0	0	0.022	0.044	0.019	0.032	0.043	0		CPI-SS0BA601DC4	BDNF_NTRK2
CPI-SS03105D292	CSF1_SLC7A1	simple:P09603	simple:P30825	CSF1	SLC7A1	TRUE	FALSE	TRUE	I2D	FALSE	0.71	0.527	0.38	0.317	0.235	0.193	0.714	0.531	0.384	0.321	0.239	0.197	0.841	0.658	0.511	0.448	0.366	0.324	0.739	0.556	0.41	0.346	0.264	0.222	0.673	0.489	0.343	0.28	0.198	0.156	0.72	0.537	0.391	0.327	0.245	0.203		CPI-SS09A36B221	BDNF_SORT1
CPI-SS0E41702C1	IGF1_IGF1R	simple:P05019	simple:P08069	IGF1	IGF1R	TRUE	FALSE	TRUE	curated	FALSE	0.493	0.308	0.658	0.235	0.246	0.248	0	0	0	0	0	0	0.471	0.286	0.636	0.213	0.224	0.225	0.571	0.386	0.736	0.313	0.324	0.326	0.488	0.303	0.653	0.23	0.241	0.243	0	0	0	0	0	0		CPI-SS07CCAD9BF	GRN_SORT1
CPI-SS0BA601DC4	BDNF_NTRK2	simple:P23560	simple:Q16620	BDNF	NTRK2	TRUE	FALSE	TRUE	curated	FALSE	0.022	0	0.022	0	0	0	0.134	0	0.134	0	0	0	0.057	0	0.058	0	0	0	0.01	0	0.011	0	0	0	0.02	0	0.021	0	0	0	0	0	0	0	0	0		CPI-SS04F3A1E5C	COPA_SORT1
CPI-SS09A36B221	BDNF_SORT1	simple:P23560	simple:Q99523	BDNF	SORT1	TRUE	FALSE	TRUE	I2D,IMEx,InnateDB-All,IntAct	FALSE	0.37	0.454	0.216	0.05	0.076	0.09	0.482	0.566	0.329	0.162	0.189	0.203	0.405	0.49	0.252	0.086	0.112	0.126	0.358	0.442	0.205	0.039	0.065	0.079	0.368	0.452	0.215	0.049	0.075	0.089	0	0	0	0	0	0		CPI-SS03F0B666C	BDNF_F11R
CPI-SS07CCAD9BF	GRN_SORT1	simple:P28799	simple:Q99523	GRN	SORT1	TRUE	FALSE	TRUE	IMEx,InnateDB-All,MINT	FALSE	1.296	1.38	1.143	0.977	1.003	1.017	1.445	1.53	1.292	1.126	1.152	1.166	1.246	1.33	1.093	0.926	0.953	0.967	1.34	1.424	1.187	1.021	1.047	1.061	1.318	1.402	1.165	0.998	1.025	1.039	1.488	1.572	1.335	1.169	1.195	1.209		CPI-SS02A0FF87F	FAM3C_CLEC2D
CPI-SS04F3A1E5C	COPA_SORT1	simple:P53621	simple:Q99523	COPA	SORT1	TRUE	FALSE	TRUE	IMEx,InnateDB-All,IntAct,MatrixDB	FALSE	1.004	1.089	0.851	0.685	0.711	0.725	0.853	0.937	0.7	0.533	0.559	0.573	1.03	1.114	0.877	0.711	0.737	0.751	1.07	1.154	0.917	0.751	0.777	0.791	1.352	1.436	1.199	1.033	1.059	1.073	1.029	1.113	0.876	0.709	0.736	0.75		CPI-SS0F8EFEECF	TNF_DAG1
CPI-SS03F0B666C	BDNF_F11R	simple:P23560	simple:Q9Y624	BDNF	F11R	TRUE	FALSE	TRUE	IMEx,InnateDB-All,IntAct	FALSE	0.634	0.852	0.47	0.032	0.022	0.064	0.746	0.965	0.582	0.144	0.134	0.176	0.67	0.888	0.506	0.067	0.058	0.099	0.623	0.841	0.459	0.02	0.01	0.052	0.633	0.851	0.469	0.03	0.02	0.062	0	0	0	0	0	0		CPI-SS0BD9F32BA	LGALS9_DAG1
CPI-SS02A0FF87F	FAM3C_CLEC2D	simple:Q92520	simple:Q9UHP7	FAM3C	CLEC2D	TRUE	FALSE	TRUE	IMEx,InnateDB-All,IntAct	FALSE	0.365	0.31	0.316	0.394	0.388	0.35	0.431	0.376	0.382	0.46	0.453	0.415	0.274	0.219	0.224	0.303	0.296	0.258	0.182	0.127	0.133	0.211	0.205	0.167	0.25	0.195	0.201	0.279	0.273	0.234	0.219	0.164	0.17	0.248	0.242	0.204		CPI-SS02EBC1BB0	TNF_NOTCH1
CPI-SS0F8EFEECF	TNF_DAG1	simple:P01375	simple:Q14118	TNF	DAG1	TRUE	FALSE	TRUE	InnateDB-All	FALSE	0.503	0.509	0.312	0.509	0.656	0.341	0.762	0.768	0.572	0.769	0.916	0.601	0.572	0.578	0.381	0.578	0.725	0.41	0.324	0.33	0.134	0.331	0.478	0.163	0	0	0	0	0	0	0.331	0.337	0.141	0.338	0.485	0.17		CPI-SS04A5D6B6F	DLL1_NOTCH1
CPI-SS0BD9F32BA	LGALS9_DAG1	simple:O00182	simple:Q14118	LGALS9	DAG1	TRUE	FALSE	TRUE	InnateDB-All	FALSE	0.428	0.434	0.238	0.435	0.582	0.267	0.516	0.522	0.325	0.522	0.669	0.355	0.425	0.431	0.235	0.431	0.578	0.264	0.514	0.52	0.324	0.521	0.668	0.353	0.814	0.82	0.623	0.82	0.967	0.652	0.43	0.436	0.239	0.436	0.583	0.269		CPI-SS0B81F1BF5	TNF_SEMA4C
CPI-SS02EBC1BB0	TNF_NOTCH1	simple:P01375	simple:P46531	TNF	NOTCH1	TRUE	FALSE	TRUE	I2D	FALSE	0.251	0.21	0.228	0.195	0	0.206	0.511	0.47	0.487	0.455	0	0.466	0.32	0.279	0.297	0.264	0	0.275	0.073	0.032	0.05	0.017	0	0.028	0	0	0	0	0	0	0.08	0.039	0.056	0.024	0	0.035		CPI-SS0AB21032D	PLXNB2_SEMA4C
CPI-SS04A5D6B6F	DLL1_NOTCH1	simple:O00548	simple:P46531	DLL1	NOTCH1	FALSE	FALSE	TRUE	curated	FALSE	0.065	0.024	0.041	0.009	0	0.02	0.076	0.035	0.053	0.02	0	0.032	0.09	0.048	0.066	0.033	0	0.045	0.149	0.107	0.125	0.092	0	0.104	0.15	0.109	0.126	0.094	0	0.105	0.204	0.163	0.18	0.148	0	0.159		CPI-SS04B4619D0	TNF_TNFRSF1A
CPI-SS0B81F1BF5	TNF_SEMA4C	simple:P01375	simple:Q9C0C4	TNF	SEMA4C	TRUE	FALSE	TRUE	InnateDB-All	FALSE	0.641	0.382	0.57	0.416	0.267	0.572	0.9	0.642	0.83	0.676	0.526	0.832	0.709	0.451	0.639	0.485	0.335	0.641	0.462	0.204	0.392	0.238	0.088	0.394	0	0	0	0	0	0	0.469	0.211	0.399	0.244	0.095	0.4		CPI-SS0F9B3B259	TNFSF13_TNFRSF1A
CPI-SS0AB21032D	PLXNB2_SEMA4C	simple:O15031	simple:Q9C0C4	PLXNB2	SEMA4C	FALSE	TRUE	TRUE	curated	FALSE	1.057	0.799	0.987	0.833	0.683	0.989	1.64	1.382	1.57	1.416	1.266	1.572	1.254	0.996	1.183	1.029	0.88	1.185	0.903	0.644	0.832	0.678	0.529	0.834	0.691	0.432	0.62	0.466	0.317	0.622	0.735	0.477	0.665	0.511	0.361	0.667		CPI-SS08B7D54A3	TNF_FAS
CPI-SS04B4619D0	TNF_TNFRSF1A	simple:P01375	simple:P19438	TNF	TNFRSF1A	TRUE	FALSE	TRUE	curated	FALSE	0.382	0.451	0.343	0.611	0.667	0.481	0.642	0.711	0.603	0.871	0.927	0.741	0.451	0.52	0.412	0.68	0.736	0.55	0.204	0.273	0.165	0.433	0.489	0.303	0	0	0	0	0	0	0.211	0.28	0.172	0.44	0.496	0.31		CPI-SS0A83A7E30	TNFSF13_FAS
CPI-SS0F9B3B259	TNFSF13_TNFRSF1A	simple:O75888	simple:P19438	TNFSF13	TNFRSF1A	TRUE	FALSE	TRUE	I2D,InnateDB-All	FALSE	0.195	0.264	0.156	0.424	0.479	0.294	0.199	0.268	0.16	0.428	0.483	0.298	0	0	0	0	0	0	0.194	0.264	0.156	0.423	0.479	0.293	0	0	0	0	0	0	0	0	0	0	0	0		CPI-SS0E7D5974D	TNF_TNFRSF1B
CPI-SS08B7D54A3	TNF_FAS	simple:P01375	simple:P25445	TNF	FAS	TRUE	FALSE	TRUE	InnateDB-All	FALSE	0.334	0.628	0.45	0.407	0.455	0.457	0.594	0.888	0.71	0.667	0.715	0.716	0.403	0.697	0.519	0.476	0.524	0.526	0.156	0.45	0.272	0.229	0.277	0.279	0	0	0	0	0	0	0.162	0.457	0.279	0.236	0.284	0.285		CPI-SS048A2311A	TNF_RIPK1
CPI-SS0A83A7E30	TNFSF13_FAS	simple:O75888	simple:P25445	TNFSF13	FAS	TRUE	FALSE	TRUE	I2D,InnateDB-All	FALSE	0.146	0.441	0.263	0.22	0.268	0.269	0.15	0.445	0.267	0.224	0.272	0.273	0	0	0	0	0	0	0.146	0.44	0.262	0.22	0.268	0.269	0	0	0	0	0	0	0	0	0	0	0	0		CPI-SS0DEDA3567	TNFSF10_RIPK1
CPI-SS0E7D5974D	TNF_TNFRSF1B	simple:P01375	simple:P20333	TNF	TNFRSF1B	TRUE	FALSE	TRUE	curated	FALSE	0.294	0.402	0.628	1.954	1.668	1.6	0.554	0.662	0.888	2.213	1.927	1.86	0.363	0.471	0.697	2.023	1.737	1.669	0.116	0.224	0.45	1.775	1.489	1.422	0	0	0	0	0	0	0.123	0.231	0.457	1.782	1.496	1.429		CPI-SS0FBC9234C	TNF_PTPRS
CPI-SS048A2311A	TNF_RIPK1	simple:P01375	simple:Q13546	TNF	RIPK1	TRUE	FALSE	TRUE	I2D,IMEx,InnateDB,InnateDB-All,IntAct,MINT	FALSE	0.39	0.422	0.431	0.316	0.352	0.34	0.649	0.681	0.691	0.576	0.612	0.6	0.459	0.49	0.5	0.385	0.421	0.409	0.211	0.243	0.253	0.138	0.174	0.162	0	0	0	0	0	0	0.218	0.25	0.259	0.145	0.181	0.169		CPI-SS00F4DDF4B	PTN_PTPRS
CPI-SS0DEDA3567	TNFSF10_RIPK1	simple:P50591	simple:Q13546	TNFSF10	RIPK1	TRUE	FALSE	TRUE	InnateDB-All	FALSE	1.381	1.413	1.422	1.308	1.344	1.332	0.922	0.954	0.964	0.849	0.885	0.873	0.558	0.59	0.599	0.484	0.52	0.509	0.239	0.271	0.28	0.165	0.201	0.19	0.265	0.297	0.306	0.191	0.227	0.216	0.302	0.334	0.343	0.228	0.264	0.252		CPI-SS034B442CE	TNF_CELSR2
CPI-SS0FBC9234C	TNF_PTPRS	simple:P01375	simple:Q13332	TNF	PTPRS	TRUE	FALSE	TRUE	InnateDB-All	FALSE	0.193	0	0	0.195	0	0	0.453	0	0	0.455	0	0	0.262	0	0	0.264	0	0	0.015	0	0	0.017	0	0	0	0	0	0	0	0	0.022	0	0	0.024	0	0		CPI-SS0DBA4D668	DPP4_CXCL12
CPI-SS00F4DDF4B	PTN_PTPRS	simple:P21246	simple:Q13332	PTN	PTPRS	TRUE	FALSE	TRUE	I2D,IMEx,InnateDB-All,IntAct	FALSE	0.137	0	0	0.14	0	0	0.037	0	0	0.039	0	0	0.204	0	0	0.206	0	0	1.468	0	0	1.471	0	0	2.367	0	0	2.369	0	0	0.362	0	0	0.364	0	0		CPI-SS07155793F	ACKR3_CXCL12
CPI-SS034B442CE	TNF_CELSR2	simple:P01375	simple:Q9HCU4	TNF	CELSR2	TRUE	FALSE	TRUE	InnateDB-All	FALSE	0.295	0.272	0.28	0.21	0	0.197	0.555	0.532	0.54	0.47	0	0.457	0.364	0.341	0.349	0.279	0	0.266	0.117	0.094	0.102	0.032	0	0.019	0	0	0	0	0	0	0.124	0.101	0.109	0.039	0	0.026		CPI-SS026776C89	HLA-DQB2_PRL
CPI-SS0DBA4D668	DPP4_CXCL12	simple:P27487	simple:P48061	DPP4	CXCL12	TRUE	TRUE	FALSE	curated	FALSE	0.102	0	0.107	0.173	0.577	0	0.888	0	0.892	0.959	1.363	0	0.322	0	0.326	0.393	0.797	0	0.422	0	0.426	0.493	0.897	0	0.38	0	0.384	0.451	0.855	0	1.098	0	1.102	1.169	1.573	0		CPI-SS0EF0750A7	HLA-DRB1_OGN
CPI-SS07155793F	ACKR3_CXCL12	simple:P25106	simple:P48061	ACKR3	CXCL12	TRUE	TRUE	FALSE	guidetopharmacology.org	FALSE	0.052	0	0.057	0.123	0.528	0	0.062	0	0.067	0.133	0.538	0	0.035	0	0.039	0.106	0.51	0	0.024	0	0.029	0.095	0.5	0	0.014	0	0.018	0.085	0.489	0	0.061	0	0.065	0.132	0.536	0		CPI-SS01BCB9360	NCAM1_BDNF
CPI-SS026776C89	HLA-DQB2_PRL	simple:HLADQB2	simple:P01236	HLA-DQB2	PRL	TRUE	TRUE	FALSE	InnateDB-All	FALSE	0.048	0.017	0.325	1.205	2.766	0.241	0	0	0	0	0	0	0	0	0	0	0	0	0	0	0	0	0	0	0	0	0	0	0	0	0	0	0	0	0	0		CPI-SS07D71C546	NOTCH2_IL24
CPI-SS0EF0750A7	HLA-DRB1_OGN	simple:HLADRB1	simple:P20774	HLA-DRB1	OGN	TRUE	TRUE	FALSE	InnateDB-All	FALSE	0	0	0	0.795	0.789	0	0	0	0	0.459	0.453	0	0	0	0	0.476	0.47	0	0	0	0	0.097	0.091	0	0	0	0	0.027	0.021	0	0	0	0	0.363	0.357	0		CPI-SS02770D68F	NOTCH2_JAG2
CPI-SS01BCB9360	NCAM1_BDNF	simple:P13591	simple:P23560	NCAM1	BDNF	TRUE	TRUE	FALSE	I2D	FALSE	0.014	0.126	0.05	0.003	0.012	0	0	0	0	0	0	0	0.025	0.137	0.061	0.013	0.023	0	0	0	0	0	0	0	0	0	0	0	0	0	0	0	0	0	0	0		CPI-SS08C3D27F7	NOTCH1_JAG2
CPI-SS07D71C546	NOTCH2_IL24	simple:Q04721	simple:Q13007	NOTCH2	IL24	TRUE	TRUE	FALSE	IMEx,InnateDB-All,MINT	FALSE	0.277	0	0.322	0.33	0	1.26	0.197	0	0.242	0.25	0	1.18	0.254	0	0.299	0.307	0	1.236	0.122	0	0.167	0.175	0	1.105	0.089	0	0.133	0.141	0	1.071	0.179	0	0.223	0.231	0	1.161		CPI-SS05FEE05CB	NOTCH4_JAG2
CPI-SS02770D68F	NOTCH2_JAG2	simple:Q04721	simple:Q9Y219	NOTCH2	JAG2	FALSE	TRUE	FALSE	curated	FALSE	0.356	0.312	0.379	0.282	0	0.278	0.276	0.232	0.3	0.202	0	0.198	0.333	0.289	0.356	0.259	0	0.255	0.201	0.157	0.225	0.127	0	0.123	0.168	0.123	0.191	0.093	0	0.09	0.258	0.213	0.281	0.183	0	0.18		CPI-SS0C4D54E39	NOTCH3_JAG2
CPI-SS08C3D27F7	NOTCH1_JAG2	simple:P46531	simple:Q9Y219	NOTCH1	JAG2	FALSE	TRUE	FALSE	curated	FALSE	0.149	0.104	0.172	0.074	0	0.071	0.108	0.063	0.131	0.033	0	0.03	0.125	0.081	0.148	0.051	0	0.047	0.093	0.048	0.116	0.018	0	0.015	0	0	0	0	0	0	0.104	0.059	0.127	0.029	0	0.026		CPI-SS0B42AD9EF	NOTCH1_WNT4
CPI-SS05FEE05CB	NOTCH4_JAG2	simple:Q99466	simple:Q9Y219	NOTCH4	JAG2	FALSE	TRUE	FALSE	curated	FALSE	0	0	0	0	0	0	0	0	0	0	0	0	0.118	0.073	0.141	0.044	0	0.04	0.092	0.047	0.115	0.017	0	0.014	0.112	0.067	0.135	0.037	0	0.034	0.105	0.06	0.128	0.03	0	0.027		CPI-SS0FA326344	FZD6_WNT4
CPI-SS0C4D54E39	NOTCH3_JAG2	simple:Q9UM47	simple:Q9Y219	NOTCH3	JAG2	FALSE	TRUE	FALSE	curated	FALSE	0.182	0.138	0.205	0.108	0	0.104	0.139	0.095	0.163	0.065	0	0.061	0.13	0.085	0.153	0.056	0	0.052	0.112	0.068	0.135	0.038	0	0.034	0.12	0.075	0.143	0.046	0	0.042	0.137	0.093	0.161	0.063	0	0.059		CPI-SS0B87FE6E0	NOTCH1_JAG1
CPI-SS0B42AD9EF	NOTCH1_WNT4	simple:P46531	simple:P56705	NOTCH1	WNT4	TRUE	TRUE	FALSE	I2D	FALSE	0.099	0	0.154	0.448	0.426	0.257	0.058	0	0.112	0.407	0.385	0.216	0.076	0	0.13	0.425	0.403	0.234	0.043	0	0.097	0.392	0.37	0.201	0	0	0	0	0	0	0.054	0	0.109	0.403	0.382	0.212		CPI-SS01A07768A	CD46_JAG1
CPI-SS0FA326344	FZD6_WNT4	simple:O60353	simple:P56705	FZD6	WNT4	TRUE	TRUE	FALSE	curated	FALSE	0.209	0	0.263	0.557	0.536	0.367	0.155	0	0.209	0.504	0.482	0.313	0.169	0	0.223	0.518	0.496	0.327	0.054	0	0.108	0.403	0.381	0.212	0.072	0	0.126	0.421	0.399	0.23	0.08	0	0.134	0.428	0.407	0.238		CPI-SS030EDC420	FZD9_WNT7A
CPI-SS0B87FE6E0	NOTCH1_JAG1	simple:P46531	simple:P78504	NOTCH1	JAG1	FALSE	TRUE	FALSE	curated	FALSE	0.246	0.157	0.215	0.067	0.072	0.071	0.205	0.116	0.173	0.026	0.031	0.03	0.223	0.133	0.191	0.044	0.049	0.047	0.19	0.1	0.158	0.011	0.016	0.015	0	0	0	0	0	0	0.202	0.112	0.17	0.022	0.027	0.026		CPI-SS05C2D0200	FZD9_WNT1
CPI-SS01A07768A	CD46_JAG1	simple:P15529	simple:P78504	CD46	JAG1	FALSE	TRUE	FALSE	curated	FALSE	1.78	1.69	1.748	1.6	1.605	1.604	2.093	2.003	2.061	1.914	1.919	1.918	1.992	1.902	1.96	1.812	1.817	1.816	1.676	1.587	1.645	1.497	1.502	1.501	1.262	1.172	1.23	1.083	1.088	1.086	1.57	1.48	1.538	1.39	1.395	1.394		CPI-SS09FF3A1EA	FZD9_WNT2
CPI-SS030EDC420	FZD9_WNT7A	simple:O00144	simple:O00755	FZD9	WNT7A	TRUE	TRUE	FALSE	I2D	FALSE	0	0	0	0	0	0	0	0	0	0	0	0	0.257	1.249	0.47	0.015	0.008	0.046	0	0	0	0	0	0	0	0	0	0	0	0	0	0	0	0	0	0		CPI-SS08B249DBA	CCL2_CCR10
CPI-SS05C2D0200	FZD9_WNT1	simple:O00144	simple:P04628	FZD9	WNT1	TRUE	TRUE	FALSE	I2D	FALSE	0	0	0	0	0	0	0	0	0	0	0	0	0	0	0	0.007	0	0	0	0	0	0	0	0	0	0	0	0	0	0	0	0	0	0	0	0		CPI-SS0FDAB7BA8	CXCL10_DPP4
CPI-SS09FF3A1EA	FZD9_WNT2	simple:O00144	simple:P09544	FZD9	WNT2	TRUE	TRUE	FALSE	curated	FALSE	0	0	0	0	0	0	0	0	0	0	0	0	0	0	0	0.006	0	0.027	0	0	0	0	0	0	0	0	0	0	0	0	0	0	0	0	0	0		CPI-SS0FAE7ABEF	PYY_DPP4
CPI-SS08B249DBA	CCL2_CCR10	simple:P13500	simple:P46092	CCL2	CCR10	TRUE	FALSE	TRUE	I2D	FALSE	0	0	0.058	0.085	0.07	0.138	0	0	0.007	0.035	0.02	0.088	0	0	0.165	0.192	0.177	0.245	0	0	0.035	0.062	0.047	0.116	0	0	0	0	0	0	0	0	0.266	0.294	0.278	0.347		CPI-SS0CDAC688B	CXCL2_DPP4
CPI-SS0FDAB7BA8	CXCL10_DPP4	simple:P02778	simple:P27487	CXCL10	DPP4	TRUE	FALSE	TRUE	curated	FALSE	0	0	0	0	0	0	0	0	0	0	0	0	0	0	0	0	0	0	0.107	0.893	0.327	0.427	0.385	1.103	0.205	0.991	0.425	0.525	0.483	1.201	0	0	0	0	0	0		CPI-SS0BC7CD11B	LGALS9_MET
CPI-SS0FAE7ABEF	PYY_DPP4	simple:P10082	simple:P27487	PYY	DPP4	TRUE	FALSE	TRUE	InnateDB-All,MINT	FALSE	0.124	0.91	0.344	0.444	0.401	1.12	0.097	0.882	0.316	0.416	0.374	1.092	0.103	0.889	0.323	0.423	0.381	1.099	0	0	0	0	0	0	0	0	0	0	0	0	0	0	0	0	0	0		CPI-SS0419B80C4	LGALS9_LRP1
CPI-SS0CDAC688B	CXCL2_DPP4	simple:P19875	simple:P27487	CXCL2	DPP4	TRUE	FALSE	TRUE	curated	FALSE	3.535	4.32	3.755	3.854	3.812	4.531	2.975	3.761	3.195	3.295	3.252	3.971	3.142	3.928	3.362	3.462	3.42	4.138	0.341	1.126	0.56	0.66	0.618	1.336	0.376	1.162	0.596	0.696	0.654	1.372	0.332	1.117	0.552	0.651	0.609	1.328		CPI-SS02928C71A	PDGFB_LRP1
CPI-SS0BC7CD11B	LGALS9_MET	simple:O00182	simple:P08581	LGALS9	MET	TRUE	FALSE	TRUE	InnateDB-All	FALSE	1.089	1.806	1.38	0.187	0.15	0.173	1.177	1.894	1.468	0.275	0.238	0.26	1.086	1.803	1.377	0.184	0.147	0.17	1.175	1.892	1.466	0.273	0.236	0.259	1.474	2.191	1.766	0.572	0.535	0.558	1.091	1.808	1.382	0.188	0.152	0.174		CPI-SS006C6537E	MDK_LRP1
CPI-SS0419B80C4	LGALS9_LRP1	simple:O00182	simple:Q07954	LGALS9	LRP1	TRUE	FALSE	TRUE	InnateDB-All	FALSE	0.16	0.154	0.378	1.059	0.884	0.988	0.248	0.241	0.466	1.147	0.972	1.075	0.157	0.151	0.375	1.056	0.881	0.984	0.246	0.24	0.464	1.145	0.97	1.074	0.545	0.539	0.764	1.444	1.269	1.373	0.162	0.155	0.38	1.06	0.886	0.989		CPI-SS014958F32	LGALS9_CD47
CPI-SS02928C71A	PDGFB_LRP1	simple:P01127	simple:Q07954	PDGFB	LRP1	TRUE	FALSE	TRUE	I2D,InnateDB-All	FALSE	0.072	0.065	0.29	0.97	0.796	0.899	0.123	0.116	0.341	1.022	0.847	0.95	0.124	0.118	0.342	1.023	0.848	0.952	0.081	0.075	0.299	0.98	0.805	0.908	0	0	0	0	0	0	0.052	0.046	0.27	0.951	0.776	0.879		CPI-SS0339AE950	SIRPA_CD47
CPI-SS006C6537E	MDK_LRP1	simple:P21741	simple:Q07954	MDK	LRP1	TRUE	FALSE	TRUE	I2D,InnateDB-All	FALSE	0.899	0.893	1.118	1.798	1.623	1.727	0.965	0.959	1.183	1.864	1.689	1.793	0.782	0.776	1	1.681	1.506	1.61	2.024	2.018	2.243	2.923	2.749	2.852	2.698	2.692	2.916	3.597	3.422	3.525	0.336	0.33	0.554	1.235	1.06	1.163		CPI-SS0A9FB762A	LGALS9_PTPRK
CPI-SS014958F32	LGALS9_CD47	simple:O00182	simple:Q08722	LGALS9	CD47	TRUE	FALSE	TRUE	InnateDB-All	FALSE	1.56	3.042	1.394	0.295	0.298	0.458	1.647	3.13	1.481	0.382	0.385	0.546	1.557	3.039	1.39	0.292	0.294	0.455	1.646	3.128	1.479	0.381	0.383	0.544	1.945	3.428	1.779	0.68	0.683	0.844	1.561	3.044	1.395	0.296	0.299	0.46		CPI-SS0472C478C	BMP7_PTPRK
CPI-SS0339AE950	SIRPA_CD47	simple:P78324	simple:Q08722	SIRPA	CD47	FALSE	TRUE	TRUE	curated	FALSE	1.51	2.992	1.344	0.245	0.248	0.409	1.48	2.963	1.314	0.215	0.218	0.379	1.524	3.006	1.357	0.259	0.261	0.422	1.55	3.033	1.384	0.285	0.288	0.449	1.45	2.933	1.284	0.185	0.188	0.349	2.051	3.533	1.884	0.786	0.788	0.949		CPI-SS0CB863B46	WNT5A_PTPRK
CPI-SS0A9FB762A	LGALS9_PTPRK	simple:O00182	simple:Q15262	LGALS9	PTPRK	TRUE	FALSE	TRUE	InnateDB-All	FALSE	0.351	0.379	0.33	0.159	0.118	0.225	0.438	0.466	0.417	0.247	0.206	0.313	0.347	0.375	0.326	0.156	0.115	0.222	0.436	0.465	0.415	0.245	0.204	0.311	0.736	0.764	0.715	0.545	0.503	0.611	0.352	0.38	0.331	0.161	0.12	0.227		CPI-SS002DF6C31	LGALS9_SLC1A5
CPI-SS0472C478C	BMP7_PTPRK	simple:P18075	simple:Q15262	BMP7	PTPRK	TRUE	FALSE	TRUE	InnateDB-All	FALSE	0.239	0.267	0.218	0.048	0.006	0.114	0.268	0.296	0.246	0.076	0.035	0.142	0.26	0.288	0.239	0.069	0.028	0.135	0	0	0	0	0	0	0	0	0	0	0	0	0.262	0.29	0.241	0.071	0.03	0.137		CPI-SS08877A081	LGALS9_COLEC12
CPI-SS0CB863B46	WNT5A_PTPRK	simple:P41221	simple:Q15262	WNT5A	PTPRK	TRUE	FALSE	TRUE	InnateDB-All	FALSE	1.663	1.691	1.642	1.472	1.431	1.538	0.914	0.942	0.893	0.723	0.682	0.789	5.766	5.794	5.745	5.575	5.534	5.641	26.518	26.546	26.497	26.327	26.286	26.393	25.115	25.143	25.094	24.924	24.883	24.99	22.236	22.264	22.215	22.045	22.004	22.111		CPI-SS09C52F54E	LGALS9_SORL1
CPI-SS002DF6C31	LGALS9_SLC1A5	simple:O00182	simple:Q15758	LGALS9	SLC1A5	TRUE	FALSE	TRUE	I2D,InnateDB-All	FALSE	0.398	0.357	0.37	0.871	0.577	0.492	0.486	0.445	0.458	0.959	0.664	0.579	0.395	0.354	0.367	0.868	0.574	0.488	0.484	0.443	0.456	0.957	0.663	0.578	0.783	0.742	0.755	1.256	0.962	0.877	0.4	0.359	0.371	0.873	0.578	0.493		CPI-SS083CBFACD	MDK_SORL1
CPI-SS08877A081	LGALS9_COLEC12	simple:O00182	simple:Q5KU26	LGALS9	COLEC12	TRUE	FALSE	TRUE	InnateDB-All	FALSE	0.116	0	0	0	0	0.145	0.203	0	0	0	0	0.233	0.112	0	0	0	0	0.142	0.201	0	0	0	0	0.231	0.501	0	0	0	0	0.53	0.117	0	0	0	0	0.147		CPI-SS048346C2B	LGALS9_MRC2
CPI-SS09C52F54E	LGALS9_SORL1	simple:O00182	simple:Q92673	LGALS9	SORL1	TRUE	FALSE	TRUE	InnateDB-All	FALSE	1.02	0.68	0.66	0.163	0	0	1.107	0.767	0.747	0.25	0	0	1.016	0.676	0.656	0.16	0	0	1.106	0.765	0.746	0.249	0	0	1.405	1.065	1.045	0.548	0	0	1.021	0.681	0.661	0.164	0	0		CPI-SS05A26A1DE	PDGFB_PDGFRB
CPI-SS083CBFACD	MDK_SORL1	simple:P21741	simple:Q92673	MDK	SORL1	TRUE	FALSE	TRUE	InnateDB-All	FALSE	1.759	1.419	1.399	0.902	0	0	1.825	1.485	1.465	0.968	0	0	1.642	1.302	1.282	0.785	0	0	2.884	2.544	2.524	2.027	0	0	3.557	3.217	3.197	2.7	0	0	1.195	0.855	0.835	0.339	0	0		CPI-SS0FEEB187C	PDGFB_PDGFRA
CPI-SS048346C2B	LGALS9_MRC2	simple:O00182	simple:Q9UBG0	LGALS9	MRC2	TRUE	FALSE	TRUE	InnateDB-All	FALSE	0.168	0.151	0.44	1.599	1.645	1.009	0.256	0.239	0.528	1.687	1.733	1.097	0.165	0.148	0.437	1.596	1.642	1.006	0.254	0.237	0.526	1.685	1.731	1.095	0.553	0.537	0.825	1.984	2.031	1.395	0.169	0.153	0.441	1.601	1.647	1.011		CPI-SS0B70EB09E	PDGFA_PDGFRA
CPI-SS05A26A1DE	PDGFB_PDGFRB	simple:P01127	simple:P09619	PDGFB	PDGFRB	TRUE	FALSE	TRUE	curated	FALSE	0.175	0.043	0.605	3.575	2.032	2.074	0.226	0.094	0.657	3.626	2.083	2.125	0.228	0.095	0.658	3.628	2.085	2.127	0.184	0.052	0.615	3.585	2.042	2.083	0	0	0	0	0	0	0.155	0.023	0.586	3.556	2.013	2.054		CPI-SS0193C3064	WNT1_FZD8
CPI-SS0FEEB187C	PDGFB_PDGFRA	simple:P01127	simple:P16234	PDGFB	PDGFRA	TRUE	FALSE	TRUE	curated	FALSE	0.144	0.045	0.446	1.909	2.304	2.183	0.195	0.096	0.497	1.96	2.356	2.234	0.197	0.098	0.499	1.962	2.357	2.236	0.153	0.054	0.456	1.919	2.314	2.192	0	0	0	0	0	0	0.125	0.026	0.427	1.89	2.285	2.163		CPI-SS0D782F60B	WNT4_FZD8
CPI-SS0B70EB09E	PDGFA_PDGFRA	simple:P04085	simple:P16234	PDGFA	PDGFRA	TRUE	FALSE	TRUE	curated	FALSE	0.325	0.226	0.627	2.09	2.485	2.364	0.358	0.259	0.66	2.123	2.518	2.397	0.462	0.363	0.764	2.228	2.623	2.501	0.15	0.051	0.452	1.915	2.31	2.189	0.127	0.028	0.429	1.892	2.287	2.166	0.169	0.07	0.471	1.934	2.329	2.208		CPI-SS0B2D5BA95	WNT5A_FZD1
CPI-SS0193C3064	WNT1_FZD8	simple:P04628	simple:Q9H461	WNT1	FZD8	TRUE	FALSE	TRUE	I2D,InnateDB-All	FALSE	0	0	0	0	0	0	0	0	0	0	0	0	0	0	0	0	0	0	0.117	0.021	0.061	0.024	0.096	0.025	0	0	0	0	0	0	0	0	0	0	0	0		CPI-SS0DC5ADBF1	WNT1_FZD1
CPI-SS0D782F60B	WNT4_FZD8	simple:P56705	simple:Q9H461	WNT4	FZD8	TRUE	FALSE	TRUE	I2D	FALSE	0.149	0.052	0.093	0.056	0.127	0.056	0	0	0	0	0	0	0.203	0.107	0.147	0.11	0.181	0.11	0.497	0.401	0.441	0.404	0.476	0.405	0.476	0.379	0.42	0.383	0.454	0.383	0.307	0.21	0.251	0.214	0.285	0.214		CPI-SS0CA020C34	WNT4_FZD1
CPI-SS0B2D5BA95	WNT5A_FZD1	simple:P41221	simple:Q9UP38	WNT5A	FZD1	TRUE	FALSE	TRUE	curated	FALSE	1.56	1.493	1.439	1.458	1.459	0	0.81	0.744	0.69	0.709	0.709	0	5.663	5.596	5.542	5.561	5.561	0	26.415	26.348	26.294	26.313	26.313	0	25.011	24.945	24.891	24.91	24.91	0	22.133	22.066	22.012	22.031	22.032	0		CPI-SS0E4DE8215	WNT2_FZD1
CPI-SS0DC5ADBF1	WNT1_FZD1	simple:P04628	simple:Q9UP38	WNT1	FZD1	TRUE	FALSE	TRUE	curated	FALSE	0	0	0	0	0	0	0	0	0	0	0	0	0	0	0	0	0	0	0.138	0.071	0.018	0.036	0.037	0	0	0	0	0	0	0	0	0	0	0	0	0		CPI-SS0E7523314	WNT3_FZD1
CPI-SS0CA020C34	WNT4_FZD1	simple:P56705	simple:Q9UP38	WNT4	FZD1	TRUE	FALSE	TRUE	I2D	FALSE	0.169	0.103	0.049	0.068	0.068	0	0	0	0	0	0	0	0.224	0.157	0.103	0.122	0.122	0	0.518	0.451	0.398	0.416	0.417	0	0.497	0.43	0.376	0.395	0.395	0	0.327	0.26	0.207	0.226	0.226	0		CPI-SS0D81C6C1D	WNT7B_FZD1
CPI-SS0E4DE8215	WNT2_FZD1	simple:P09544	simple:Q9UP38	WNT2	FZD1	TRUE	FALSE	TRUE	I2D	FALSE	0	0	0	0	0	0	0	0	0	0	0	0	0	0	0	0	0	0	0.137	0.07	0.016	0.035	0.035	0	0	0	0	0	0	0	0.158	0.091	0.037	0.056	0.057	0		CPI-SS01C2BA5C8	WNT5A_FZD2
CPI-SS0E7523314	WNT3_FZD1	simple:P56703	simple:Q9UP38	WNT3	FZD1	TRUE	FALSE	TRUE	I2D	FALSE	0	0	0	0	0	0	0	0	0	0	0	0	0	0	0	0	0	0	0.174	0.107	0.053	0.072	0.072	0	0.147	0.08	0.026	0.045	0.046	0	0.218	0.151	0.097	0.116	0.116	0		CPI-SS02C418D99	WNT2_FZD2
CPI-SS0D81C6C1D	WNT7B_FZD1	simple:P56706	simple:Q9UP38	WNT7B	FZD1	TRUE	FALSE	TRUE	curated	FALSE	0.143	0.076	0.023	0.041	0.042	0	0.289	0.222	0.168	0.187	0.188	0	0.182	0.115	0.061	0.08	0.081	0	0	0	0	0	0	0	0	0	0	0	0	0	0	0	0	0	0	0		CPI-SS0097929A7	BMP7_SLAMF1
CPI-SS01C2BA5C8	WNT5A_FZD2	simple:P41221	simple:Q14332	WNT5A	FZD2	TRUE	FALSE	TRUE	curated	FALSE	1.429	0	1.433	1.461	1.454	1.498	0.68	0	0.684	0.711	0.705	0.749	5.532	0	5.536	5.563	5.557	5.601	26.284	0	26.288	26.315	26.309	26.353	24.881	0	24.885	24.912	24.906	24.95	22.002	0	22.006	22.034	22.027	22.071		CPI-SS0E32BEF02	WNT5A_FZD5
CPI-SS02C418D99	WNT2_FZD2	simple:P09544	simple:Q14332	WNT2	FZD2	TRUE	FALSE	TRUE	curated	FALSE	0	0	0	0	0	0	0	0	0	0	0	0	0	0	0	0	0	0	0.006	0	0.01	0.037	0.031	0.075	0	0	0	0	0	0	0.027	0	0.031	0.059	0.052	0.096		CPI-SS05550A895	WNT7A_FZD5
CPI-SS0097929A7	BMP7_SLAMF1	simple:P18075	simple:Q13291	BMP7	SLAMF1	TRUE	FALSE	TRUE	InnateDB-All	FALSE	0.004	0	0.019	0.008	0	0.129	0.033	0	0.048	0.037	0	0.158	0.026	0	0.041	0.029	0	0.151	0	0	0	0	0	0	0	0	0	0	0	0	0.028	0	0.043	0.032	0	0.153		CPI-SS0D4F593F1	WNT5A_EPHA7
CPI-SS0E32BEF02	WNT5A_FZD5	simple:P41221	simple:Q13467	WNT5A	FZD5	TRUE	FALSE	TRUE	curated	FALSE	1.581	1.506	1.514	1.429	0	1.465	0.832	0.756	0.765	0.679	0	0.715	5.684	5.609	5.617	5.532	0	5.567	26.436	26.361	26.369	26.284	0	26.32	25.033	24.957	24.966	24.881	0	24.916	22.154	22.079	22.087	22.002	0	22.038		CPI-SS03E450F99	EFNA1_EPHA7
CPI-SS05550A895	WNT7A_FZD5	simple:O00755	simple:Q13467	WNT7A	FZD5	TRUE	FALSE	TRUE	curated	FALSE	0.409	0.334	0.342	0.257	0	0.292	1.402	1.327	1.335	1.25	0	1.285	0.623	0.547	0.555	0.47	0	0.506	0.168	0.092	0.1	0.015	0	0.051	0.161	0.085	0.094	0.008	0	0.044	0.199	0.123	0.132	0.046	0	0.082		CPI-SS0D5DBB634	EFNA3_EPHA7
CPI-SS0D4F593F1	WNT5A_EPHA7	simple:P41221	simple:Q15375	WNT5A	EPHA7	TRUE	FALSE	TRUE	InnateDB-All	FALSE	1.486	1.433	0	1.445	0	1.558	0.737	0.684	0	0.696	0	0.809	5.589	5.536	0	5.548	0	5.661	26.341	26.288	0	26.3	0	26.413	24.938	24.885	0	24.897	0	25.01	22.059	22.006	0	22.018	0	22.131		CPI-SS0F81DBF22	EFNA4_EPHA7
CPI-SS03E450F99	EFNA1_EPHA7	simple:P20827	simple:Q15375	EFNA1	EPHA7	TRUE	FALSE	TRUE	curated	FALSE	0.526	0.473	0	0.485	0	0.598	0.296	0.243	0	0.255	0	0.368	0.283	0.23	0	0.242	0	0.355	0.083	0.03	0	0.042	0	0.155	0	0	0	0	0	0	0.082	0.029	0	0.041	0	0.154		CPI-SS028688B7B	EFNA5_EPHA7
CPI-SS0D5DBB634	EFNA3_EPHA7	simple:P52797	simple:Q15375	EFNA3	EPHA7	FALSE	FALSE	TRUE	curated	FALSE	0.161	0.108	0	0.12	0	0.233	0.073	0.02	0	0.032	0	0.145	0.081	0.027	0	0.039	0	0.153	0.066	0.013	0	0.025	0	0.138	0	0	0	0	0	0	0.097	0.044	0	0.056	0	0.169		CPI-SS0C56C483F	WNT5A_ANTXR1
CPI-SS0F81DBF22	EFNA4_EPHA7	simple:P52798	simple:Q15375	EFNA4	EPHA7	TRUE	FALSE	TRUE	curated	FALSE	0.129	0.076	0	0.088	0	0.201	0.165	0.112	0	0.124	0	0.237	0.151	0.098	0	0.11	0	0.223	0.086	0.033	0	0.045	0	0.158	0.116	0.063	0	0.075	0	0.188	0.099	0.046	0	0.058	0	0.171		CPI-SS0331C5A49	GDF11_ANTXR1
CPI-SS028688B7B	EFNA5_EPHA7	simple:P52803	simple:Q15375	EFNA5	EPHA7	FALSE	FALSE	TRUE	curated	FALSE	0.147	0.094	0	0.106	0	0.219	0.231	0.178	0	0.19	0	0.303	0.147	0.094	0	0.106	0	0.219	0.077	0.024	0	0.036	0	0.149	0.084	0.031	0	0.043	0	0.156	0	0	0	0	0	0		CPI-SS0E7CBFD03	WNT5A_ROR2
CPI-SS0C56C483F	WNT5A_ANTXR1	simple:P41221	simple:Q9H6X2	WNT5A	ANTXR1	TRUE	FALSE	TRUE	InnateDB-All	FALSE	1.758	1.49	2.164	3.439	3.986	4.516	1.009	0.741	1.415	2.69	3.236	3.767	5.861	5.593	6.267	7.542	8.089	8.619	26.613	26.345	27.019	28.294	28.841	29.371	25.21	24.942	25.616	26.891	27.437	27.968	22.331	22.064	22.737	24.012	24.559	25.089		CPI-SS00A6240B6	WNT1_ROR2
CPI-SS0331C5A49	GDF11_ANTXR1	simple:O95390	simple:Q9H6X2	GDF11	ANTXR1	TRUE	FALSE	TRUE	InnateDB-All	FALSE	0.605	0.337	1.011	2.286	2.833	3.363	0.494	0.226	0.9	2.175	2.721	3.252	0.49	0.222	0.896	2.171	2.717	3.248	0.477	0.209	0.883	2.158	2.704	3.234	0.466	0.198	0.872	2.147	2.693	3.224	0.496	0.228	0.902	2.177	2.724	3.254		CPI-SS002673EFE	WNT5A_FZD3
CPI-SS0E7CBFD03	WNT5A_ROR2	simple:P41221	simple:Q01974	WNT5A	ROR2	TRUE	FALSE	TRUE	I2D	FALSE	1.473	1.453	1.463	1.585	1.609	1.522	0.724	0.704	0.714	0.835	0.859	0.773	5.576	5.556	5.566	5.687	5.712	5.625	26.328	26.308	26.318	26.439	26.464	26.377	24.925	24.905	24.915	25.036	25.06	24.974	22.046	22.026	22.036	22.158	22.182	22.096		CPI-SS014B0FCD2	WNT1_FZD3
CPI-SS00A6240B6	WNT1_ROR2	simple:P04628	simple:Q01974	WNT1	ROR2	TRUE	FALSE	TRUE	InnateDB-All	FALSE	0	0	0	0	0	0	0	0	0	0	0	0	0	0	0	0	0	0	0.052	0.032	0.042	0.163	0.187	0.101	0	0	0	0	0	0	0	0	0	0	0	0		CPI-SS0F26BB901	WNT2_FZD3
CPI-SS002673EFE	WNT5A_FZD3	simple:P41221	simple:Q9NPG1	WNT5A	FZD3	TRUE	FALSE	TRUE	curated	FALSE	1.668	1.568	1.543	1.501	1.577	1.514	0.918	0.819	0.793	0.751	0.827	0.765	5.771	5.671	5.646	5.604	5.68	5.617	26.523	26.423	26.398	26.356	26.432	26.369	25.12	25.02	24.995	24.952	25.028	24.966	22.241	22.141	22.116	22.074	22.15	22.087		CPI-SS073F3FAD5	WNT5A_ROR1
CPI-SS014B0FCD2	WNT1_FZD3	simple:P04628	simple:Q9NPG1	WNT1	FZD3	TRUE	FALSE	TRUE	I2D	FALSE	0	0	0	0	0	0	0	0	0	0	0	0	0	0	0	0	0	0	0.246	0.147	0.121	0.079	0.155	0.093	0	0	0	0	0	0	0	0	0	0	0	0		CPI-SS0179FBFD3	TNFRSF10A_TNFSF10
CPI-SS0F26BB901	WNT2_FZD3	simple:P09544	simple:Q9NPG1	WNT2	FZD3	TRUE	FALSE	TRUE	curated	FALSE	0	0	0	0	0	0	0	0	0	0	0	0	0	0	0	0	0	0	0.245	0.145	0.12	0.078	0.154	0.091	0	0	0	0	0	0	0.266	0.167	0.141	0.099	0.175	0.113		CPI-SS0AD0ED887	TNFRSF11B_TNFSF10
CPI-SS073F3FAD5	WNT5A_ROR1	simple:P41221	simple:Q01973	WNT5A	ROR1	TRUE	FALSE	TRUE	IMEx	FALSE	0	1.438	1.432	1.434	1.431	0	0	0.688	0.683	0.684	0.682	0	0	5.541	5.535	5.536	5.534	0	0	26.293	26.287	26.288	26.286	0	0	24.889	24.884	24.885	24.883	0	0	22.011	22.005	22.007	22.004	0		CPI-SS0898D7F7F	TNFRSF10B_TNFSF10
CPI-SS0179FBFD3	TNFRSF10A_TNFSF10	simple:O00220	simple:P50591	TNFRSF10A	TNFSF10	TRUE	TRUE	FALSE	curated	FALSE	1.309	0.85	0.486	0.167	0.193	0.23	1.369	0.91	0.545	0.226	0.252	0.289	1.368	0.909	0.545	0.225	0.251	0.288	1.208	0.749	0.385	0.066	0.092	0.128	0	0	0	0	0	0	1.21	0.751	0.387	0.068	0.093	0.13		CPI-SS01ECFDA18	TNFRSF10C_TNFSF10
CPI-SS0AD0ED887	TNFRSF11B_TNFSF10	simple:O00300	simple:P50591	TNFRSF11B	TNFSF10	TRUE	FALSE	FALSE	curated	FALSE	1.21	0.751	0.387	0.068	0.094	0.131	1.276	0.817	0.453	0.134	0.159	0.196	1.588	1.129	0.765	0.446	0.472	0.508	2.128	1.669	1.305	0.986	1.012	1.049	1.354	0.895	0.53	0.211	0.237	0.274	4.941	4.482	4.118	3.799	3.824	3.861		CPI-SS039799099	FGFR1_NCAM1
CPI-SS0898D7F7F	TNFRSF10B_TNFSF10	simple:O14763	simple:P50591	TNFRSF10B	TNFSF10	TRUE	TRUE	FALSE	curated	FALSE	1.32	0.861	0.497	0.178	0.204	0.24	1.34	0.881	0.517	0.198	0.223	0.26	1.431	0.972	0.607	0.288	0.314	0.351	1.293	0.834	0.47	0.151	0.176	0.213	1.23	0.771	0.407	0.088	0.114	0.15	1.185	0.726	0.362	0.043	0.069	0.106		CPI-SS07833475A	FGFR1_FGF7
CPI-SS01ECFDA18	TNFRSF10C_TNFSF10	simple:O14798	simple:P50591	TNFRSF10C	TNFSF10	TRUE	TRUE	FALSE	curated	FALSE	1.187	0.728	0.364	0.045	0.071	0.108	1.229	0.77	0.406	0.087	0.113	0.15	1.184	0.725	0.36	0.041	0.067	0.104	1.184	0.725	0.361	0.042	0.067	0.104	0	0	0	0	0	0	0	0	0	0	0	0		CPI-SS038E93B77	FGFR1_FGF9
CPI-SS039799099	FGFR1_NCAM1	simple:P11362	simple:P13591	FGFR1	NCAM1	TRUE	TRUE	TRUE	curated	FALSE	0.409	0	0.42	0	0	0	0.091	0	0.102	0	0	0	0.315	0	0.325	0	0	0	0.598	0	0.609	0	0	0	0.388	0	0.399	0	0	0	1.075	0	1.086	0	0	0		CPI-SS0907A7598	FGFR2_FGF9
CPI-SS07833475A	FGFR1_FGF7	simple:P11362	simple:P21781	FGFR1	FGF7	TRUE	TRUE	FALSE	I2D	FALSE	0.453	0.416	0.519	0.719	0.755	1.547	0.135	0.098	0.201	0.401	0.437	1.229	0.359	0.322	0.425	0.624	0.66	1.453	0.642	0.605	0.708	0.908	0.944	1.736	0.432	0.395	0.498	0.698	0.734	1.526	1.119	1.082	1.185	1.385	1.421	2.213		CPI-SS0649EA05F	FGFR4_FGF9
CPI-SS038E93B77	FGFR1_FGF9	simple:P11362	simple:P31371	FGFR1	FGF9	TRUE	TRUE	FALSE	I2D,InnateDB-All	FALSE	1.074	0.563	0.711	0.451	0.447	0	0.756	0.245	0.392	0.133	0.128	0	0.979	0.468	0.616	0.357	0.352	0	1.263	0.752	0.9	0.64	0.636	0	1.053	0.542	0.69	0.43	0.426	0	1.74	1.229	1.376	1.117	1.112	0		CPI-SS07A9A501C	FGFR3_FGF9
CPI-SS0907A7598	FGFR2_FGF9	simple:P21802	simple:P31371	FGFR2	FGF9	TRUE	TRUE	FALSE	I2D,InnateDB-All	FALSE	0.873	0.362	0.51	0.25	0.246	0	0.72	0.209	0.357	0.097	0.093	0	0.844	0.333	0.481	0.222	0.217	0	0.671	0.16	0.308	0.049	0.044	0	0	0	0	0	0	0	0.703	0.192	0.34	0.081	0.076	0		CPI-SS0BF490275	FGFR1_KL
CPI-SS0649EA05F	FGFR4_FGF9	simple:P22455	simple:P31371	FGFR4	FGF9	TRUE	TRUE	FALSE	I2D	FALSE	0.673	0.162	0.31	0.05	0.046	0	0	0	0	0	0	0	0	0	0	0	0	0	0	0	0	0	0	0	0	0	0	0	0	0	0	0	0	0	0	0		CPI-SS06A0B20BD	FGFR2_EPHA4
CPI-SS07A9A501C	FGFR3_FGF9	simple:P22607	simple:P31371	FGFR3	FGF9	TRUE	TRUE	FALSE	I2D,InnateDB-All	FALSE	0.674	0.163	0.311	0.051	0.047	0	0.798	0.287	0.435	0.175	0.171	0	0.79	0.279	0.426	0.167	0.162	0	0.673	0.162	0.31	0.05	0.045	0	0	0	0	0	0	0	0.684	0.173	0.321	0.062	0.057	0		CPI-SS0EBFE1854	EFNA1_EPHA4
CPI-SS0BF490275	FGFR1_KL	simple:P11362	simple:Q9UEF7	FGFR1	KL	TRUE	TRUE	FALSE	I2D	FALSE	0.427	0	0	0.439	0.421	0	0.109	0	0	0.121	0.103	0	0.333	0	0	0.345	0.327	0	0.616	0	0	0.628	0.61	0	0.406	0	0	0.418	0.4	0	1.093	0	0	1.105	1.087	0		CPI-SS05B4EB419	EFNA3_EPHA4
CPI-SS06A0B20BD	FGFR2_EPHA4	simple:P21802	simple:P54764	FGFR2	EPHA4	TRUE	TRUE	TRUE	I2D,InnateDB-All	FALSE	0.237	0.215	0.241	0.239	0.278	0	0.084	0.063	0.088	0.086	0.125	0	0.209	0.187	0.212	0.21	0.249	0	0.036	0.014	0.039	0.037	0.076	0	0	0	0	0	0	0	0.068	0.046	0.071	0.069	0.108	0		CPI-SS0659DBE72	EFNA4_EPHA4
CPI-SS0EBFE1854	EFNA1_EPHA4	simple:P20827	simple:P54764	EFNA1	EPHA4	TRUE	FALSE	TRUE	curated	FALSE	0.498	0.476	0.502	0.5	0.539	0	0.268	0.246	0.272	0.27	0.309	0	0.255	0.233	0.259	0.257	0.296	0	0.056	0.034	0.06	0.057	0.097	0	0	0	0	0	0	0	0.055	0.033	0.058	0.056	0.096	0		CPI-SS0FC01B947	EFNA5_EPHA4
CPI-SS05B4EB419	EFNA3_EPHA4	simple:P52797	simple:P54764	EFNA3	EPHA4	FALSE	FALSE	TRUE	curated	FALSE	0.134	0.112	0.137	0.135	0.174	0	0.046	0.024	0.049	0.047	0.086	0	0.053	0.031	0.057	0.054	0.094	0	0.038	0.016	0.042	0.04	0.079	0	0	0	0	0	0	0	0.069	0.047	0.073	0.071	0.11	0		CPI-SS087E0E3FB	EFNB2_EPHA4
CPI-SS0659DBE72	EFNA4_EPHA4	simple:P52798	simple:P54764	EFNA4	EPHA4	TRUE	FALSE	TRUE	curated	FALSE	0.101	0.079	0.105	0.103	0.142	0	0.138	0.116	0.141	0.139	0.179	0	0.124	0.102	0.127	0.125	0.164	0	0.059	0.037	0.062	0.06	0.099	0	0.088	0.066	0.092	0.09	0.129	0	0.072	0.05	0.075	0.073	0.112	0		CPI-SS0816A4ED4	FGFR4_EPHA4
CPI-SS0FC01B947	EFNA5_EPHA4	simple:P52803	simple:P54764	EFNA5	EPHA4	FALSE	FALSE	TRUE	curated	FALSE	0.12	0.098	0.123	0.121	0.16	0	0.203	0.181	0.207	0.205	0.244	0	0.119	0.097	0.123	0.121	0.16	0	0.049	0.027	0.053	0.051	0.09	0	0.056	0.035	0.06	0.058	0.097	0	0	0	0	0	0	0		CPI-SS0D1AE5C79	FGFR3_EPHA4
CPI-SS087E0E3FB	EFNB2_EPHA4	simple:P52799	simple:P54764	EFNB2	EPHA4	FALSE	TRUE	TRUE	curated	FALSE	0.161	0.139	0.165	0.162	0.202	0	0.234	0.212	0.238	0.236	0.275	0	0.196	0.174	0.199	0.197	0.237	0	0.355	0.333	0.359	0.356	0.396	0	0.294	0.272	0.298	0.296	0.335	0	0.946	0.924	0.95	0.948	0.987	0		CPI-SS00D9A0644	FGFR2_CD83
CPI-SS0816A4ED4	FGFR4_EPHA4	simple:P22455	simple:P54764	FGFR4	EPHA4	TRUE	TRUE	TRUE	I2D,InnateDB-All	FALSE	0.037	0.015	0.041	0.039	0.078	0	0	0	0	0	0	0	0	0	0	0	0	0	0	0	0	0	0	0	0	0	0	0	0	0	0	0	0	0	0	0		CPI-SS02E314589	FGFR2_NECTIN1
CPI-SS0D1AE5C79	FGFR3_EPHA4	simple:P22607	simple:P54764	FGFR3	EPHA4	TRUE	TRUE	TRUE	I2D,InnateDB-All	FALSE	0.038	0.016	0.042	0.04	0.079	0	0.162	0.14	0.166	0.164	0.203	0	0.154	0.132	0.158	0.156	0.195	0	0.037	0.015	0.041	0.039	0.078	0	0	0	0	0	0	0	0.049	0.027	0.052	0.05	0.089	0		CPI-SS02C29C238	FGFR3_NECTIN1
CPI-SS00D9A0644	FGFR2_CD83	simple:P21802	simple:Q01151	FGFR2	CD83	TRUE	TRUE	TRUE	InnateDB-All	FALSE	0.247	0	0.223	0.277	0.279	0.263	0.094	0	0.071	0.124	0.127	0.111	0.219	0	0.195	0.248	0.251	0.235	0.046	0	0.022	0.075	0.078	0.062	0	0	0	0	0	0	0.078	0	0.054	0.107	0.11	0.094		CPI-SS0CC898553	FGFR2_PTPRR
CPI-SS02E314589	FGFR2_NECTIN1	simple:P21802	simple:Q15223	FGFR2	NECTIN1	TRUE	TRUE	TRUE	InnateDB-All	FALSE	0.237	0.266	0.226	0.228	0.212	0.233	0.084	0.113	0.073	0.075	0.059	0.081	0.208	0.238	0.197	0.199	0.183	0.205	0.035	0.065	0.024	0.026	0.01	0.032	0	0	0	0	0	0	0.067	0.097	0.056	0.058	0.042	0.064		CPI-SS0658257AC	FGFR4_PTPRR
CPI-SS02C29C238	FGFR3_NECTIN1	simple:P22607	simple:Q15223	FGFR3	NECTIN1	TRUE	TRUE	TRUE	InnateDB-All	FALSE	0.037	0.067	0.026	0.029	0.013	0.034	0.162	0.191	0.151	0.153	0.137	0.159	0.153	0.183	0.142	0.144	0.128	0.15	0.036	0.066	0.025	0.028	0.012	0.033	0	0	0	0	0	0	0.048	0.078	0.037	0.039	0.023	0.045		CPI-SS098F416C1	FGFR2_XPR1
CPI-SS0CC898553	FGFR2_PTPRR	simple:P21802	simple:Q15256	FGFR2	PTPRR	TRUE	TRUE	TRUE	InnateDB-All	FALSE	0.266	0.278	0.272	0.217	0	0.215	0.113	0.125	0.119	0.064	0	0.062	0.238	0.249	0.244	0.188	0	0.187	0.065	0.077	0.071	0.016	0	0.014	0	0	0	0	0	0	0.096	0.108	0.102	0.047	0	0.045		CPI-SS0EB136379	WNT1_CD36
CPI-SS0658257AC	FGFR4_PTPRR	simple:P22455	simple:Q15256	FGFR4	PTPRR	TRUE	TRUE	TRUE	InnateDB-All	FALSE	0.066	0.078	0.072	0.017	0	0.015	0	0	0	0	0	0	0	0	0	0	0	0	0	0	0	0	0	0	0	0	0	0	0	0	0	0	0	0	0	0		CPI-SS0D8972B21	WNT1_RYK
CPI-SS098F416C1	FGFR2_XPR1	simple:P21802	simple:Q9UBH6	FGFR2	XPR1	TRUE	TRUE	TRUE	InnateDB-All	FALSE	0.422	0.447	0.331	0.287	0.23	0.236	0.269	0.294	0.178	0.135	0.077	0.084	0.394	0.418	0.302	0.259	0.202	0.208	0.221	0.245	0.129	0.086	0.029	0.035	0	0	0	0	0	0	0.252	0.277	0.161	0.118	0.06	0.067		CPI-SS0A69F13A3	WNT4_SMO
CPI-SS0EB136379	WNT1_CD36	simple:P04628	simple:P16671	WNT1	CD36	TRUE	FALSE	TRUE	InnateDB	FALSE	0	0	0	0	0	0	0	0	0	0	0	0	0	0	0	0	0	0	0.008	0	0	0.012	0	0	0	0	0	0	0	0	0	0	0	0	0	0		CPI-SS016B7C7D6	BMP2_SMO
CPI-SS0D8972B21	WNT1_RYK	simple:P04628	simple:P34925	WNT1	RYK	TRUE	FALSE	TRUE	I2D	FALSE	0	0	0	0	0	0	0	0	0	0	0	0	0	0	0	0	0	0	0.29	0.165	0.161	0.231	0.159	0.242	0	0	0	0	0	0	0	0	0	0	0	0		CPI-SS0C2561156	WNT2_FZD4
CPI-SS0A69F13A3	WNT4_SMO	simple:P56705	simple:Q99835	WNT4	SMO	TRUE	FALSE	TRUE	I2D	FALSE	0.085	0.047	0.045	0.102	0.051	0.086	0	0	0	0	0	0	0.139	0.101	0.099	0.157	0.106	0.141	0.434	0.396	0.394	0.451	0.4	0.435	0.412	0.374	0.372	0.43	0.379	0.413	0.243	0.205	0.203	0.26	0.209	0.244		CPI-SS0B8083B44	WNT7B_FZD4
CPI-SS016B7C7D6	BMP2_SMO	simple:P12643	simple:Q99835	BMP2	SMO	TRUE	FALSE	TRUE	I2D	FALSE	0.08	0.042	0.04	0.097	0.046	0.081	0.081	0.043	0.041	0.099	0.048	0.082	0.159	0.121	0.119	0.176	0.125	0.16	0.232	0.194	0.192	0.249	0.198	0.233	0.133	0.095	0.093	0.151	0.1	0.134	1.474	1.436	1.434	1.491	1.44	1.475		CPI-SS01469637C	WNT2B_FZD4
CPI-SS0C2561156	WNT2_FZD4	simple:P09544	simple:Q9ULV1	WNT2	FZD4	TRUE	FALSE	TRUE	curated	FALSE	0	0	0	0	0	0	0	0	0	0	0	0	0	0	0	0	0	0	0.022	0	0.016	0.039	0.046	0.037	0	0	0	0	0	0	0.044	0	0.037	0.06	0.068	0.058		CPI-SS0A683CBC1	WNT7B_FZD10
CPI-SS0B8083B44	WNT7B_FZD4	simple:P56706	simple:Q9ULV1	WNT7B	FZD4	TRUE	FALSE	TRUE	curated	FALSE	0.029	0	0.023	0.045	0.053	0.043	0.175	0	0.168	0.191	0.199	0.189	0.068	0	0.062	0.084	0.092	0.082	0	0	0	0	0	0	0	0	0	0	0	0	0	0	0	0	0	0		CPI-SS0423580E5	DLL1_NOTCH2
CPI-SS01469637C	WNT2B_FZD4	simple:Q93097	simple:Q9ULV1	WNT2B	FZD4	TRUE	FALSE	TRUE	curated	FALSE	0.061	0	0.055	0.078	0.085	0.075	0.045	0	0.039	0.062	0.07	0.06	0.193	0	0.186	0.209	0.217	0.207	0.033	0	0.027	0.049	0.057	0.047	0.027	0	0.021	0.044	0.051	0.042	0	0	0	0	0	0		CPI-SS060B82BBC	JAG1_NOTCH2
CPI-SS0A683CBC1	WNT7B_FZD10	simple:P56706	simple:Q9ULW2	WNT7B	FZD10	TRUE	FALSE	TRUE	curated	FALSE	0.093	0.051	0.022	0.029	0	0.026	0.239	0.197	0.167	0.175	0	0.172	0.132	0.09	0.06	0.068	0	0.065	0	0	0	0	0	0	0	0	0	0	0	0	0	0	0	0	0	0		CPI-SS0FB5FE587	DLL1_NOTCH4
CPI-SS0423580E5	DLL1_NOTCH2	simple:O00548	simple:Q04721	DLL1	NOTCH2	FALSE	FALSE	TRUE	curated	FALSE	0.272	0.192	0.249	0.117	0.084	0.174	0.284	0.204	0.261	0.129	0.096	0.186	0.297	0.217	0.274	0.142	0.109	0.199	0.356	0.276	0.333	0.201	0.168	0.258	0.357	0.278	0.334	0.203	0.169	0.259	0.411	0.331	0.388	0.256	0.223	0.313		CPI-SS0837E9F59	JAG1_NOTCH4
CPI-SS060B82BBC	JAG1_NOTCH2	simple:P78504	simple:Q04721	JAG1	NOTCH2	FALSE	FALSE	TRUE	curated	FALSE	0.454	0.374	0.431	0.299	0.265	0.355	0.364	0.284	0.341	0.209	0.176	0.266	0.422	0.342	0.399	0.267	0.234	0.324	0.275	0.195	0.252	0.12	0.086	0.176	0.28	0.2	0.257	0.125	0.091	0.181	0.278	0.198	0.255	0.123	0.09	0.18		CPI-SS047232C64	DLL1_NOTCH3
CPI-SS0FB5FE587	DLL1_NOTCH4	simple:O00548	simple:Q99466	DLL1	NOTCH4	FALSE	FALSE	TRUE	curated	FALSE	0	0	0.034	0.008	0.028	0.021	0	0	0.046	0.019	0.039	0.032	0	0	0.059	0.033	0.053	0.046	0	0	0.118	0.092	0.111	0.105	0	0	0.119	0.093	0.113	0.106	0	0	0.173	0.147	0.167	0.16		CPI-SS0B99F22A2	JAG1_NOTCH3
CPI-SS0837E9F59	JAG1_NOTCH4	simple:P78504	simple:Q99466	JAG1	NOTCH4	FALSE	FALSE	TRUE	curated	FALSE	0	0	0.216	0.189	0.209	0.202	0	0	0.126	0.1	0.12	0.113	0	0	0.184	0.158	0.177	0.171	0	0	0.036	0.01	0.03	0.023	0	0	0.041	0.015	0.035	0.028	0	0	0.04	0.014	0.034	0.027		CPI-SS0BFB29A42	PLXNB2_PTN
CPI-SS047232C64	DLL1_NOTCH3	simple:O00548	simple:Q9UM47	DLL1	NOTCH3	FALSE	FALSE	TRUE	curated	FALSE	0.098	0.055	0.046	0.028	0.036	0.053	0.11	0.067	0.058	0.04	0.048	0.065	0.123	0.08	0.071	0.053	0.061	0.078	0.182	0.139	0.13	0.112	0.12	0.137	0.183	0.141	0.131	0.113	0.121	0.138	0.237	0.194	0.185	0.167	0.175	0.192		CPI-SS08FAC0A55	PLXNB2_SEMA4D
CPI-SS0B99F22A2	JAG1_NOTCH3	simple:P78504	simple:Q9UM47	JAG1	NOTCH3	FALSE	FALSE	TRUE	curated	FALSE	0.28	0.237	0.228	0.21	0.218	0.235	0.19	0.147	0.138	0.12	0.128	0.145	0.248	0.205	0.196	0.178	0.186	0.203	0.101	0.058	0.048	0.03	0.038	0.056	0.106	0.063	0.053	0.035	0.043	0.061	0.104	0.061	0.052	0.034	0.042	0.059		CPI-SS0CCCF7C69	PLXNB1_SEMA4D
CPI-SS0BFB29A42	PLXNB2_PTN	simple:O15031	simple:P21246	PLXNB2	PTN	TRUE	TRUE	FALSE	I2D,IMEx,InnateDB-All,IntAct	FALSE	0.74	0.639	0.807	2.071	2.969	0.964	1.323	1.222	1.389	2.654	3.552	1.547	0.936	0.835	1.003	2.267	3.166	1.16	0.585	0.484	0.652	1.916	2.815	0.809	0.373	0.272	0.44	1.704	2.603	0.597	0.417	0.317	0.484	1.749	2.647	0.642		CPI-SS06AA638A8	CD72_SEMA4D
CPI-SS08FAC0A55	PLXNB2_SEMA4D	simple:O15031	simple:Q92854	PLXNB2	SEMA4D	FALSE	TRUE	TRUE	curated	FALSE	0.714	0.837	0.708	0.629	0.61	0.667	1.297	1.42	1.291	1.212	1.193	1.25	0.911	1.033	0.904	0.826	0.806	0.863	0.56	0.682	0.553	0.474	0.455	0.512	0.348	0.47	0.341	0.262	0.243	0.3	0.392	0.515	0.385	0.307	0.288	0.345		CPI-SS0C0A61F92	PLXNB2_SEMA4G
CPI-SS0CCCF7C69	PLXNB1_SEMA4D	simple:O43157	simple:Q92854	PLXNB1	SEMA4D	TRUE	TRUE	TRUE	curated	FALSE	0.511	0.634	0.504	0.426	0.407	0.464	0.371	0.494	0.364	0.286	0.267	0.324	0.652	0.775	0.645	0.567	0.547	0.605	0.162	0.285	0.155	0.077	0.058	0.115	0.126	0.249	0.119	0.041	0.022	0.079	0.165	0.288	0.158	0.08	0.06	0.118		CPI-SS0EBA5A4D8	VEGFD_KDR
CPI-SS06AA638A8	CD72_SEMA4D	simple:P21854	simple:Q92854	CD72	SEMA4D	FALSE	FALSE	TRUE	curated	FALSE	0.11	0.233	0.104	0.025	0.006	0.063	0	0	0	0	0	0	0.122	0.244	0.115	0.036	0.017	0.074	0.11	0.233	0.103	0.025	0.006	0.063	0.114	0.236	0.107	0.028	0.009	0.066	0	0	0	0	0	0		CPI-SS0C03F7CDC	VEGFA_KDR
CPI-SS0C0A61F92	PLXNB2_SEMA4G	simple:O15031	simple:Q9NTN9	PLXNB2	SEMA4G	FALSE	TRUE	FALSE	curated	FALSE	0.62	0.645	0.669	0.61	0	0.621	1.203	1.228	1.252	1.193	0	1.203	0.817	0.841	0.865	0.806	0	0.817	0.466	0.49	0.514	0.455	0	0.466	0.254	0.278	0.302	0.243	0	0.254	0.298	0.323	0.347	0.287	0	0.298		CPI-SS0859C173B	TNFSF14_LTBR
CPI-SS0EBA5A4D8	VEGFD_KDR	simple:O43915	simple:P35968	VEGFD	KDR	TRUE	FALSE	TRUE	curated	FALSE	0.027	0.009	0.055	0.264	0.07	0.11	0	0	0	0	0	0	0.039	0.021	0.067	0.276	0.082	0.122	0.098	0.08	0.127	0.335	0.141	0.182	0.088	0.07	0.117	0.325	0.131	0.172	0	0	0	0	0	0		CPI-SS0C28FEC7D	TNFSF13_TNFRSF14
CPI-SS0C03F7CDC	VEGFA_KDR	simple:P15692	simple:P35968	VEGFA	KDR	TRUE	FALSE	TRUE	curated	FALSE	2.637	2.619	2.666	2.875	2.68	2.721	1.368	1.35	1.396	1.605	1.411	1.452	3.402	3.384	3.431	3.639	3.445	3.486	4.558	4.54	4.586	4.795	4.601	4.642	2.194	2.176	2.222	2.431	2.237	2.278	4.123	4.105	4.151	4.36	4.166	4.207		CPI-SS019C98396	TNFSF14_TNFRSF14
CPI-SS0859C173B	TNFSF14_LTBR	simple:O43557	simple:P36941	TNFSF14	LTBR	TRUE	FALSE	TRUE	curated	FALSE	0	0	0	0	0	0	0	0	0	0	0	0	0.681	0.709	0.532	0.544	0.518	0.368	0.676	0.704	0.527	0.538	0.513	0.363	0	0	0	0	0	0	0	0	0	0	0	0		CPI-SS02ACCF1F7	MIF_TNFRSF14
CPI-SS0C28FEC7D	TNFSF13_TNFRSF14	simple:O75888	simple:Q92956	TNFSF13	TNFRSF14	TRUE	FALSE	TRUE	I2D,InnateDB-All	FALSE	0.4	0.442	0.459	0.143	0.102	0.788	0.405	0.446	0.463	0.147	0.106	0.793	0	0	0	0	0	0	0.4	0.442	0.458	0.143	0.102	0.788	0	0	0	0	0	0	0	0	0	0	0	0		CPI-SS095E52E66	TNFSF10_TNFRSF10D
CPI-SS019C98396	TNFSF14_TNFRSF14	simple:O43557	simple:Q92956	TNFSF14	TNFRSF14	TRUE	FALSE	TRUE	curated	FALSE	0	0	0	0	0	0	0	0	0	0	0	0	0.412	0.453	0.47	0.154	0.114	0.8	0.406	0.448	0.465	0.149	0.108	0.794	0	0	0	0	0	0	0	0	0	0	0	0		CPI-SS059EEFDC6	MIF_TNFRSF10D
CPI-SS02ACCF1F7	MIF_TNFRSF14	simple:P14174	simple:Q92956	MIF	TNFRSF14	TRUE	FALSE	TRUE	I2D,IntAct	FALSE	0.553	0.595	0.612	0.296	0.255	0.941	0.683	0.724	0.741	0.426	0.385	1.071	0.434	0.475	0.492	0.177	0.136	0.822	0.487	0.529	0.545	0.23	0.189	0.875	0.431	0.473	0.489	0.174	0.133	0.819	0.554	0.596	0.612	0.297	0.256	0.942		CPI-SS0A81A3626	WNT7A_LDLR
CPI-SS095E52E66	TNFSF10_TNFRSF10D	simple:P50591	simple:Q9UBN6	TNFSF10	TNFRSF10D	TRUE	FALSE	TRUE	curated	FALSE	1.207	1.207	1.253	1.305	1.273	1.415	0.748	0.748	0.794	0.846	0.814	0.956	0.384	0.383	0.43	0.481	0.45	0.592	0.065	0.064	0.111	0.162	0.131	0.273	0.09	0.09	0.137	0.188	0.157	0.298	0.127	0.127	0.174	0.225	0.193	0.335		CPI-SS0FF49C823	EFNA1_EPHA1
CPI-SS059EEFDC6	MIF_TNFRSF10D	simple:P14174	simple:Q9UBN6	MIF	TNFRSF10D	TRUE	FALSE	TRUE	I2D,IntAct	FALSE	0.181	0.18	0.227	0.278	0.247	0.389	0.31	0.31	0.357	0.408	0.376	0.518	0.061	0.061	0.107	0.159	0.127	0.269	0.114	0.114	0.161	0.212	0.181	0.322	0.058	0.058	0.105	0.156	0.125	0.266	0.181	0.181	0.228	0.279	0.248	0.389		CPI-SS046F6F0C1	EFNA1_EPHA2
CPI-SS0A81A3626	WNT7A_LDLR	simple:O00755	simple:P01130	WNT7A	LDLR	TRUE	FALSE	TRUE	InnateDB-All	FALSE	1.126	1.558	1.263	2.508	2.829	0.39	2.119	2.551	2.256	3.501	3.822	1.383	1.339	1.772	1.476	2.721	3.043	0.604	0.884	1.317	1.021	2.267	2.588	0.149	0.878	1.31	1.014	2.26	2.581	0.142	0.916	1.348	1.052	2.298	2.619	0.18		CPI-SS00BD8FF72	POMC_MC1R
CPI-SS0FF49C823	EFNA1_EPHA1	simple:P20827	simple:P21709	EFNA1	EPHA1	TRUE	FALSE	TRUE	curated	FALSE	0.561	0.547	0.588	0	0	0	0.331	0.317	0.358	0	0	0	0.318	0.304	0.345	0	0	0	0.119	0.105	0.146	0	0	0	0	0	0	0	0	0	0.118	0.104	0.144	0	0	0		CPI-SS03165AD8C	ACKR2_CCL2
CPI-SS046F6F0C1	EFNA1_EPHA2	simple:P20827	simple:P29317	EFNA1	EPHA2	TRUE	FALSE	TRUE	curated	FALSE	0.642	0.762	0.701	0.555	0.614	0.563	0.412	0.532	0.471	0.324	0.384	0.332	0.399	0.519	0.458	0.311	0.371	0.319	0.199	0.32	0.258	0.112	0.171	0.12	0	0	0	0	0	0	0.198	0.319	0.257	0.111	0.17	0.119		CPI-SS0BE8BE8E9	ACKR2_CCL8
CPI-SS00BD8FF72	POMC_MC1R	simple:P01189	simple:Q01726	POMC	MC1R	TRUE	FALSE	TRUE	guidetopharmacology.org	FALSE	0	0	0	0	0	0	0.081	0	0.077	0.081	0.087	0	0	0	0	0	0	0	0.039	0	0.035	0.039	0.044	0	0.039	0	0.035	0.039	0.045	0	0	0	0	0	0	0		CPI-SS0F8C2FA91	CCR1_CCL8
CPI-SS03165AD8C	ACKR2_CCL2	simple:O00590	simple:P13500	ACKR2	CCL2	TRUE	TRUE	FALSE	curated	FALSE	0.072	0.021	0.179	0.049	0	0.28	0.065	0.014	0.172	0.042	0	0.273	0.067	0.017	0.174	0.044	0	0.275	0	0	0	0	0	0	0	0	0	0	0	0	0.064	0.013	0.171	0.041	0	0.272		CPI-SS06B0861F1	ACKR2_CCL13
CPI-SS0BE8BE8E9	ACKR2_CCL8	simple:O00590	simple:P80075	ACKR2	CCL8	TRUE	TRUE	FALSE	curated	FALSE	0.09	0.097	0.535	3.193	2.822	1.776	0.083	0.09	0.528	3.186	2.815	1.769	0.086	0.092	0.53	3.189	2.817	1.772	0	0	0	0	0	0	0	0	0	0	0	0	0.083	0.089	0.527	3.186	2.814	1.769		CPI-SS0B887F7AC	CCR1_CCL13
CPI-SS0F8C2FA91	CCR1_CCL8	simple:P32246	simple:P80075	CCR1	CCL8	TRUE	TRUE	FALSE	curated	FALSE	0	0	0	0	0	0	0.08	0.086	0.524	3.183	2.811	1.766	0.089	0.096	0.534	3.192	2.821	1.775	0.102	0.108	0.546	3.205	2.833	1.788	0.082	0.089	0.526	3.185	2.814	1.768	0.119	0.125	0.563	3.222	2.85	1.805		CPI-SS091B461CB	ACKR2_CCL28
CPI-SS06B0861F1	ACKR2_CCL13	simple:O00590	simple:Q99616	ACKR2	CCL13	TRUE	TRUE	FALSE	curated	FALSE	0	0	0	0.02	0.024	0	0	0	0	0.013	0.017	0	0	0	0	0.015	0.019	0	0	0	0	0	0	0	0	0	0	0	0	0	0	0	0	0.012	0.016	0		CPI-SS064C772FE	CCR10_CCL28
CPI-SS0B887F7AC	CCR1_CCL13	simple:P32246	simple:Q99616	CCR1	CCL13	TRUE	TRUE	FALSE	guidetopharmacology.org	FALSE	0	0	0	0	0	0	0	0	0	0.009	0.013	0	0	0	0	0.019	0.023	0	0	0	0	0.031	0.036	0	0	0	0	0.011	0.016	0	0	0	0	0.048	0.052	0		CPI-SS09199F78C	CCR1_CCL23
CPI-SS091B461CB	ACKR2_CCL28	simple:O00590	simple:Q9NRJ3	ACKR2	CCL28	TRUE	TRUE	FALSE	I2D	FALSE	0.133	0.136	0.203	0.047	0.08	0.074	0.126	0.129	0.196	0.04	0.073	0.067	0.128	0.131	0.198	0.043	0.075	0.07	0	0	0	0	0	0	0	0	0	0	0	0	0.125	0.128	0.195	0.039	0.072	0.066		CPI-SS0D57FCA8C	IDE_CCL23
CPI-SS064C772FE	CCR10_CCL28	simple:P46092	simple:Q9NRJ3	CCR10	CCL28	TRUE	TRUE	FALSE	guidetopharmacology.org	FALSE	0	0	0	0	0	0	0	0	0	0	0	0	0.119	0.122	0.189	0.033	0.066	0.06	0.146	0.149	0.216	0.061	0.093	0.088	0.131	0.134	0.201	0.046	0.078	0.073	0.199	0.202	0.27	0.114	0.147	0.141		CPI-SS0A28DCA72	CXCL12_CXCR4
CPI-SS09199F78C	CCR1_CCL23	simple:P32246	simple:P55773	CCR1	CCL23	TRUE	TRUE	FALSE	curated	FALSE	0	0	0	0	0	0	0	0	0	0.008	0	0	0	0	0	0.018	0	0	0	0	0	0.03	0	0	0	0	0	0.01	0	0	0	0	0	0.047	0	0		CPI-SS04B547174	OXT_OXTR
CPI-SS0D57FCA8C	IDE_CCL23	simple:P14735	simple:P55773	IDE	CCL23	TRUE	TRUE	FALSE	InnateDB-All	FALSE	0	0	0	0.11	0	0	0	0	0	0.114	0	0	0	0	0	0.114	0	0	0	0	0	0.071	0	0	0	0	0	0.075	0	0	0	0	0	0.084	0	0		CPI-SS053613259	NRG2_ERBB3
CPI-SS0A28DCA72	CXCL12_CXCR4	simple:P48061	simple:P61073	CXCL12	CXCR4	TRUE	FALSE	TRUE	curated	FALSE	0.238	0.051	0.042	0.021	0.013	0.04	0	0	0	0	0	0	0.243	0.055	0.047	0.026	0.017	0.045	0.309	0.122	0.113	0.092	0.084	0.111	0.714	0.526	0.517	0.496	0.488	0.516	0	0	0	0	0	0		CPI-SS0E063192D	NRG2_ERBB4
CPI-SS04B547174	OXT_OXTR	simple:P01178	simple:P30559	OXT	OXTR	TRUE	FALSE	TRUE	I2D	FALSE	0	0	0	0	0	0	0	0	0	0	0	0	0	0	0	0	0	0	0.005	0.021	0	0	0	0	0	0	0	0	0	0	0	0	0	0	0	0		CPI-SS0FC42EC80	EREG_ERBB4
CPI-SS053613259	NRG2_ERBB3	simple:O14511	simple:P21860	NRG2	ERBB3	TRUE	FALSE	TRUE	curated	FALSE	0	0	0	0	0	0	0.473	0.377	0.367	0.032	0.006	0.054	0.49	0.394	0.384	0.048	0.022	0.071	0.472	0.376	0.366	0.031	0.005	0.053	0	0	0	0	0	0	0.502	0.406	0.396	0.061	0.035	0.083		CPI-SS0F0D7F25C	BTC_ERBB4
CPI-SS0E063192D	NRG2_ERBB4	simple:O14511	simple:Q15303	NRG2	ERBB4	TRUE	FALSE	TRUE	curated	FALSE	0	0	0	0	0	0	0.188	0.027	0.135	0.035	0.006	0	0.204	0.044	0.152	0.051	0.023	0	0.187	0.026	0.134	0.034	0.005	0	0	0	0	0	0	0	0.217	0.056	0.164	0.063	0.035	0		CPI-SS0BD5C2A23	NRG1_ERBB4
CPI-SS0FC42EC80	EREG_ERBB4	simple:O14944	simple:Q15303	EREG	ERBB4	TRUE	FALSE	TRUE	curated	FALSE	0.223	0.062	0.17	0.069	0.041	0	0.71	0.55	0.658	0.557	0.529	0	0.367	0.206	0.315	0.214	0.185	0	0.587	0.426	0.535	0.434	0.405	0	0.232	0.071	0.18	0.079	0.05	0	0.933	0.772	0.881	0.78	0.751	0		CPI-SS004C23DCE	EREG_EGFR
CPI-SS0F0D7F25C	BTC_ERBB4	simple:P35070	simple:Q15303	BTC	ERBB4	TRUE	FALSE	TRUE	curated	FALSE	0.248	0.087	0.196	0.095	0.066	0	0.346	0.185	0.293	0.192	0.164	0	0.273	0.113	0.221	0.12	0.092	0	0.228	0.067	0.175	0.074	0.046	0	0.26	0.099	0.208	0.107	0.078	0	0.197	0.036	0.145	0.044	0.015	0		CPI-SS0708FE6FF	NRG1_LSR
CPI-SS0BD5C2A23	NRG1_ERBB4	simple:Q02297	simple:Q15303	NRG1	ERBB4	TRUE	TRUE	TRUE	curated	FALSE	0	0	0	0	0	0	0	0	0	0	0	0	0.232	0.072	0.18	0.079	0.05	0	0.195	0.034	0.143	0.042	0.013	0	0	0	0	0	0	0	0.213	0.052	0.161	0.06	0.031	0		CPI-SS0E075E5AF	NRG1_NETO2
CPI-SS004C23DCE	EREG_EGFR	simple:O14944	simple:P00533	EREG	EGFR	TRUE	FALSE	TRUE	curated	FALSE	0.333	0.259	0.563	0.815	0.499	1.559	0.821	0.747	1.051	1.303	0.986	2.047	0.477	0.403	0.707	0.96	0.643	1.703	0.697	0.623	0.928	1.18	0.863	1.924	0.342	0.268	0.572	0.825	0.508	1.568	1.043	0.969	1.274	1.526	1.209	2.27		CPI-SS02572E1EF	NRG1_LGR4
CPI-SS0708FE6FF	NRG1_LSR	simple:Q02297	simple:Q86X29	NRG1	LSR	TRUE	TRUE	TRUE	InnateDB-All	FALSE	0	0	0	0	0	0	0	0	0	0	0	0	0.28	0.25	0.167	0.102	0.09	0.161	0.243	0.213	0.13	0.065	0.052	0.124	0	0	0	0	0	0	0.261	0.231	0.148	0.083	0.07	0.142		CPI-SS0057AB387	RSPO1_LGR4
CPI-SS0E075E5AF	NRG1_NETO2	simple:Q02297	simple:Q8NC67	NRG1	NETO2	TRUE	TRUE	TRUE	InnateDB-All	FALSE	0	0	0	0	0	0	0	0	0	0	0	0	0.053	0.085	0.051	0.056	0.093	0	0.016	0.048	0.014	0.019	0.056	0	0	0	0	0	0	0	0.034	0.066	0.032	0.037	0.074	0		CPI-SS06A999D25	PLD2_ARF1
CPI-SS02572E1EF	NRG1_LGR4	simple:Q02297	simple:Q9BXB1	NRG1	LGR4	TRUE	TRUE	TRUE	InnateDB-All	FALSE	0	0	0	0	0	0	0	0	0	0	0	0	0.793	0.17	0.465	0.233	0.227	0.069	0.756	0.133	0.428	0.195	0.19	0.032	0	0	0	0	0	0	0.774	0.151	0.446	0.213	0.208	0.05		CPI-SS0F3A089DE	SEMA3E_PLXND1
CPI-SS0057AB387	RSPO1_LGR4	simple:Q2MKA7	simple:Q9BXB1	RSPO1	LGR4	TRUE	FALSE	TRUE	guidetopharmacology.org	FALSE	0	0	0	0	0	0	0	0	0	0	0	0	0	0	0	0	0	0	0.763	0.14	0.435	0.203	0.197	0.039	0.77	0.147	0.442	0.21	0.205	0.046	0.771	0.147	0.442	0.21	0.205	0.046		CPI-SS044C72D0D	SEMA4A_PLXND1
CPI-SS06A999D25	PLD2_ARF1	simple:O14939	simple:P84077	PLD2	ARF1	FALSE	FALSE	FALSE	guidetopharmacology.org	FALSE	1.201	1.294	0.918	1.714	1.738	1.488	1.19	1.283	0.907	1.703	1.727	1.477	1.175	1.268	0.891	1.688	1.712	1.462	1.164	1.257	0.881	1.677	1.701	1.451	1.168	1.261	0.885	1.681	1.705	1.455	1.187	1.281	0.904	1.7	1.724	1.475		CPI-SS090FC28E1	EPHB6_EFNB2
CPI-SS0F3A089DE	SEMA3E_PLXND1	simple:O15041	simple:Q9Y4D7	SEMA3E	PLXND1	TRUE	FALSE	TRUE	curated	FALSE	0.171	0.316	0.482	1.413	0.856	0.704	0.198	0.343	0.509	1.44	0.883	0.731	0	0	0	0	0	0	0.17	0.315	0.48	1.411	0.854	0.702	0	0	0	0	0	0	0.203	0.348	0.514	1.445	0.887	0.736		CPI-SS0B9E8C0DE	EPHB2_EFNB2
CPI-SS044C72D0D	SEMA4A_PLXND1	simple:Q9H3S1	simple:Q9Y4D7	SEMA4A	PLXND1	FALSE	FALSE	TRUE	curated	FALSE	0.194	0.339	0.504	1.435	0.878	0.726	0	0	0	0	0	0	0.174	0.319	0.485	1.416	0.859	0.707	0	0	0	0	0	0	0	0	0	0	0	0	0	0	0	0	0	0		CPI-SS0DC4D593E	EPHB6_EFNB1
CPI-SS090FC28E1	EPHB6_EFNB2	simple:O15197	simple:P52799	EPHB6	EFNB2	TRUE	TRUE	TRUE	curated	FALSE	0.147	0.22	0.182	0.341	0.28	0.932	0	0	0	0	0	0	0.189	0.262	0.224	0.383	0.322	0.974	0.374	0.448	0.409	0.568	0.508	1.16	0.347	0.421	0.382	0.541	0.481	1.133	0.396	0.47	0.431	0.59	0.53	1.182		CPI-SS0111AAD26	EPHB2_EFNB1
CPI-SS0B9E8C0DE	EPHB2_EFNB2	simple:P29323	simple:P52799	EPHB2	EFNB2	FALSE	TRUE	TRUE	curated	FALSE	0.193	0.266	0.228	0.387	0.326	0.978	0.346	0.419	0.381	0.54	0.479	1.131	0.197	0.27	0.232	0.391	0.33	0.982	0.132	0.206	0.167	0.326	0.266	0.918	0	0	0	0	0	0	0	0	0	0	0	0		CPI-SS0FF55B42C	EPHB3_EFNB1
CPI-SS0DC4D593E	EPHB6_EFNB1	simple:O15197	simple:P98172	EPHB6	EFNB1	TRUE	TRUE	FALSE	curated	FALSE	0.058	0.183	0.095	0.059	0.065	0.173	0	0	0	0	0	0	0.1	0.224	0.136	0.1	0.106	0.215	0.286	0.41	0.322	0.286	0.292	0.401	0.259	0.383	0.295	0.259	0.265	0.374	0.307	0.432	0.344	0.308	0.314	0.422		CPI-SS0F21D6CA0	EPHB4_EFNB1
CPI-SS0111AAD26	EPHB2_EFNB1	simple:P29323	simple:P98172	EPHB2	EFNB1	FALSE	TRUE	FALSE	curated	FALSE	0.104	0.229	0.141	0.105	0.111	0.219	0.257	0.382	0.294	0.258	0.263	0.372	0.108	0.233	0.145	0.109	0.114	0.223	0.043	0.168	0.08	0.044	0.05	0.159	0	0	0	0	0	0	0	0	0	0	0	0		CPI-SS0470AF83E	EPHB1_EFNB1
CPI-SS0FF55B42C	EPHB3_EFNB1	simple:P54753	simple:P98172	EPHB3	EFNB1	FALSE	TRUE	FALSE	curated	FALSE	0.042	0.167	0.079	0.043	0.049	0.157	0.045	0.17	0.082	0.046	0.051	0.16	0.042	0.167	0.079	0.043	0.049	0.157	0.043	0.167	0.079	0.043	0.049	0.158	0.045	0.17	0.082	0.046	0.052	0.16	0	0	0	0	0	0		CPI-SS00046DCF3	EPHA4_EFNB1
CPI-SS0F21D6CA0	EPHB4_EFNB1	simple:P54760	simple:P98172	EPHB4	EFNB1	FALSE	TRUE	FALSE	curated	FALSE	0.25	0.374	0.286	0.25	0.256	0.365	0.254	0.379	0.291	0.255	0.26	0.369	0.211	0.336	0.248	0.212	0.218	0.326	0.106	0.231	0.143	0.107	0.113	0.221	0.132	0.256	0.168	0.132	0.138	0.247	0.056	0.181	0.093	0.057	0.062	0.171		CPI-SS08718E4FB	EPHB6_EFNB3
CPI-SS0470AF83E	EPHB1_EFNB1	simple:P54762	simple:P98172	EPHB1	EFNB1	FALSE	TRUE	FALSE	curated	FALSE	0	0	0	0	0	0	0	0	0	0	0	0	0	0	0	0	0	0	0.043	0.167	0.079	0.043	0.049	0.158	0	0	0	0	0	0	0.196	0.321	0.233	0.197	0.203	0.311		CPI-SS0DA366C78	EPHB2_EFNB3
CPI-SS00046DCF3	EPHA4_EFNB1	simple:P54764	simple:P98172	EPHA4	EFNB1	FALSE	TRUE	FALSE	curated	FALSE	0.072	0.197	0.109	0.073	0.078	0.187	0.05	0.175	0.087	0.051	0.057	0.165	0.076	0.2	0.112	0.076	0.082	0.191	0.074	0.198	0.11	0.074	0.08	0.189	0.113	0.237	0.149	0.113	0.119	0.228	0	0	0	0	0	0		CPI-SS0A5B945E3	EPHB3_EFNB3
CPI-SS08718E4FB	EPHB6_EFNB3	simple:O15197	simple:Q15768	EPHB6	EFNB3	TRUE	TRUE	TRUE	curated	FALSE	0.019	0	0	0.036	0.034	0.068	0	0	0	0	0	0	0.06	0	0	0.078	0.076	0.11	0.246	0	0	0.264	0.262	0.296	0.219	0	0	0.237	0.235	0.269	0.268	0	0	0.285	0.284	0.317		CPI-SS0865716E5	EPHB4_EFNB3
CPI-SS0DA366C78	EPHB2_EFNB3	simple:P29323	simple:Q15768	EPHB2	EFNB3	FALSE	TRUE	TRUE	curated	FALSE	0.065	0	0	0.082	0.08	0.114	0.217	0	0	0.235	0.233	0.267	0.068	0	0	0.086	0.084	0.118	0.004	0	0	0.022	0.02	0.054	0	0	0	0	0	0	0	0	0	0	0	0		CPI-SS0D41C7AF5	EPHB1_EFNB3
CPI-SS0A5B945E3	EPHB3_EFNB3	simple:P54753	simple:Q15768	EPHB3	EFNB3	FALSE	TRUE	TRUE	curated	FALSE	0.003	0	0	0.02	0.018	0.052	0.005	0	0	0.023	0.021	0.055	0.003	0	0	0.021	0.019	0.053	0.003	0	0	0.021	0.019	0.053	0.006	0	0	0.024	0.022	0.056	0	0	0	0	0	0		CPI-SS07CA5A6F1	EPHA4_EFNB3
CPI-SS0865716E5	EPHB4_EFNB3	simple:P54760	simple:Q15768	EPHB4	EFNB3	FALSE	TRUE	TRUE	curated	FALSE	0.21	0	0	0.228	0.226	0.26	0.215	0	0	0.232	0.23	0.264	0.172	0	0	0.189	0.187	0.221	0.067	0	0	0.085	0.083	0.117	0.092	0	0	0.11	0.108	0.142	0.016	0	0	0.034	0.032	0.066		CPI-SS08D0F9109	EFNB2_EPHB4
CPI-SS0D41C7AF5	EPHB1_EFNB3	simple:P54762	simple:Q15768	EPHB1	EFNB3	FALSE	TRUE	TRUE	curated	FALSE	0	0	0	0	0	0	0	0	0	0	0	0	0	0	0	0	0	0	0.003	0	0	0.021	0.019	0.053	0	0	0	0	0	0	0.157	0	0	0.174	0.172	0.206		CPI-SS0586F2596	EPHB2_EFNA5
CPI-SS07CA5A6F1	EPHA4_EFNB3	simple:P54764	simple:Q15768	EPHA4	EFNB3	FALSE	TRUE	TRUE	curated	FALSE	0.033	0	0	0.05	0.048	0.082	0.011	0	0	0.028	0.026	0.06	0.036	0	0	0.054	0.052	0.086	0.034	0	0	0.052	0.05	0.084	0.073	0	0	0.091	0.089	0.123	0	0	0	0	0	0		CPI-SS03A2EFDD5	EPHA1_EFNA5
CPI-SS08D0F9109	EFNB2_EPHB4	simple:P52799	simple:P54760	EFNB2	EPHB4	FALSE	TRUE	TRUE	curated	FALSE	0.338	0.343	0.3	0.195	0.22	0.145	0.412	0.416	0.373	0.269	0.294	0.218	0.373	0.378	0.335	0.23	0.255	0.18	0.532	0.537	0.494	0.389	0.415	0.339	0.472	0.476	0.433	0.329	0.354	0.278	1.124	1.128	1.085	0.981	1.006	0.93		CPI-SS02AFCED82	EPHA2_EFNA5
CPI-SS0586F2596	EPHB2_EFNA5	simple:P29323	simple:P52803	EPHB2	EFNA5	FALSE	TRUE	FALSE	curated	FALSE	0.152	0.235	0.151	0.081	0.089	0	0.305	0.388	0.304	0.234	0.241	0	0.156	0.239	0.155	0.085	0.092	0	0.091	0.175	0.091	0.02	0.028	0	0	0	0	0	0	0	0	0	0	0	0	0		CPI-SS082ABF1EA	EFNB2_EPHB3
CPI-SS03A2EFDD5	EPHA1_EFNA5	simple:P21709	simple:P52803	EPHA1	EFNA5	FALSE	TRUE	FALSE	curated	FALSE	0.182	0.266	0.182	0.112	0.119	0	0.169	0.252	0.168	0.098	0.105	0	0.209	0.293	0.209	0.139	0.146	0	0	0	0	0	0	0	0	0	0	0	0	0	0	0	0	0	0	0		CPI-SS0BFD8E056	EFNB2_EPHB1
CPI-SS02AFCED82	EPHA2_EFNA5	simple:P29317	simple:P52803	EPHA2	EFNA5	FALSE	TRUE	FALSE	curated	FALSE	0.263	0.347	0.262	0.192	0.2	0	0.384	0.467	0.383	0.313	0.32	0	0.322	0.405	0.321	0.251	0.259	0	0.176	0.259	0.175	0.105	0.113	0	0.235	0.319	0.235	0.165	0.172	0	0.184	0.267	0.183	0.113	0.121	0		CPI-SS01A8F745A	EPHA1_EFNA3
CPI-SS082ABF1EA	EFNB2_EPHB3	simple:P52799	simple:P54753	EFNB2	EPHB3	FALSE	TRUE	TRUE	curated	FALSE	0.131	0.134	0.131	0.131	0.134	0	0.204	0.207	0.205	0.205	0.208	0	0.166	0.169	0.166	0.166	0.169	0	0.325	0.328	0.325	0.325	0.328	0	0.264	0.267	0.265	0.265	0.268	0	0.917	0.919	0.917	0.917	0.92	0		CPI-SS07BECB892	EPHA2_EFNA3
CPI-SS0BFD8E056	EFNB2_EPHB1	simple:P52799	simple:P54762	EFNB2	EPHB1	FALSE	TRUE	TRUE	curated	FALSE	0	0	0	0.132	0	0.285	0	0	0	0.205	0	0.358	0	0	0	0.166	0	0.32	0	0	0	0.326	0	0.479	0	0	0	0.265	0	0.418	0	0	0	0.917	0	1.07		CPI-SS05E6D620E	EPHA1_EFNA4
CPI-SS01A8F745A	EPHA1_EFNA3	simple:P21709	simple:P52797	EPHA1	EFNA3	FALSE	TRUE	FALSE	curated	FALSE	0.197	0.108	0.116	0.101	0	0.132	0.183	0.095	0.102	0.087	0	0.118	0.223	0.135	0.143	0.128	0	0.159	0	0	0	0	0	0	0	0	0	0	0	0	0	0	0	0	0	0		CPI-SS09F973C1A	EPHA2_EFNA4
CPI-SS07BECB892	EPHA2_EFNA3	simple:P29317	simple:P52797	EPHA2	EFNA3	FALSE	TRUE	FALSE	curated	FALSE	0.277	0.189	0.196	0.182	0	0.212	0.398	0.309	0.317	0.302	0	0.333	0.336	0.248	0.255	0.24	0	0.271	0.19	0.102	0.109	0.094	0	0.125	0.249	0.161	0.168	0.154	0	0.185	0.198	0.11	0.117	0.102	0	0.133		CPI-SS04C396C5D	VGF_NTRK1
CPI-SS05E6D620E	EPHA1_EFNA4	simple:P21709	simple:P52798	EPHA1	EFNA4	TRUE	TRUE	FALSE	curated	FALSE	0.164	0.201	0.186	0.121	0.151	0.135	0.15	0.187	0.173	0.108	0.137	0.121	0.191	0.228	0.213	0.148	0.178	0.161	0	0	0	0	0	0	0	0	0	0	0	0	0	0	0	0	0	0		CPI-SS0AB647854	GPR37_PSAP
CPI-SS09F973C1A	EPHA2_EFNA4	simple:P29317	simple:P52798	EPHA2	EFNA4	TRUE	TRUE	FALSE	curated	FALSE	0.245	0.281	0.267	0.202	0.232	0.215	0.365	0.402	0.387	0.322	0.352	0.336	0.303	0.34	0.326	0.261	0.291	0.274	0.157	0.194	0.18	0.115	0.145	0.128	0.217	0.253	0.239	0.174	0.204	0.187	0.165	0.202	0.188	0.123	0.152	0.136		CPI-SS068C129D6	CSF1_SIRPA
CPI-SS04C396C5D	VGF_NTRK1	simple:O15240	simple:P04629	VGF	NTRK1	TRUE	FALSE	TRUE	InnateDB-All	FALSE	0	0	0.021	0.132	0.182	0.035	0	0	0	0	0	0	0	0	0.058	0.169	0.219	0.072	0	0	0.233	0.344	0.394	0.247	0	0	0.197	0.309	0.358	0.212	0	0	0.078	0.189	0.239	0.092		CPI-SS086615F9B	CSF1_CELSR3
CPI-SS0AB647854	GPR37_PSAP	simple:O15354	simple:P07602	GPR37	PSAP	TRUE	TRUE	FALSE	guidetopharmacology.org	FALSE	2.43	2.915	2.97	6.572	5.691	8.621	0	0	0	0	0	0	2.423	2.908	2.963	6.565	5.684	8.614	2.439	2.923	2.979	6.581	5.7	8.629	0	0	0	0	0	0	0	0	0	0	0	0		CPI-SS0A2D7895C	CEACAM1_CEACAM6
CPI-SS068C129D6	CSF1_SIRPA	simple:P09603	simple:P78324	CSF1	SIRPA	TRUE	FALSE	TRUE	I2D	FALSE	0.17	0.14	0.184	0.21	0.11	0.711	0.174	0.144	0.188	0.214	0.114	0.715	0.301	0.271	0.315	0.342	0.241	0.842	0.199	0.17	0.213	0.24	0.14	0.74	0.133	0.103	0.146	0.173	0.073	0.674	0.18	0.151	0.194	0.221	0.121	0.721		CPI-SS0322747C2	CEACAM5_CEACAM6
CPI-SS086615F9B	CSF1_CELSR3	simple:P09603	simple:Q9NYQ7	CSF1	CELSR3	TRUE	FALSE	TRUE	I2D	FALSE	0.111	0.108	0	0.108	0.116	0.138	0.115	0.112	0	0.112	0.119	0.142	0.242	0.24	0	0.239	0.247	0.269	0.14	0.138	0	0.137	0.145	0.167	0.074	0.071	0	0.07	0.078	0.101	0.122	0.119	0	0.118	0.126	0.149		CPI-SS001BF66E8	CEACAM6_CEACAM6
CPI-SS0A2D7895C	CEACAM1_CEACAM6	simple:P13688	simple:P40199	CEACAM1	CEACAM6	TRUE	FALSE	FALSE	curated	FALSE	0.242	7.231	1.284	0.119	0.1	0.117	0.304	7.292	1.346	0.18	0.162	0.179	0.232	7.22	1.274	0.108	0.09	0.107	0.222	7.211	1.264	0.099	0.08	0.097	0.286	7.274	1.328	0.162	0.144	0.16	0	0	0	0	0	0		CPI-SS079DDF890	TNFSF12_TNFRSF25
CPI-SS0322747C2	CEACAM5_CEACAM6	simple:P06731	simple:P40199	CEACAM5	CEACAM6	FALSE	FALSE	FALSE	curated	FALSE	0.28	7.268	1.322	0.157	0.138	0.155	2.524	9.513	3.566	2.401	2.382	2.399	0.927	7.916	1.969	0.804	0.785	0.802	0.237	7.226	1.279	0.114	0.095	0.112	0.229	7.217	1.271	0.106	0.087	0.104	0.214	7.202	1.256	0.09	0.072	0.089		CPI-SS0B0CF0EDF	TNFSF15_TNFRSF25
CPI-SS001BF66E8	CEACAM6_CEACAM6	simple:P40199	simple:P40199	CEACAM6	CEACAM6	FALSE	FALSE	FALSE	curated	FALSE	0.394	7.382	1.436	0.27	0.252	0.269	7.382	14.371	8.424	7.259	7.24	7.257	1.436	8.424	2.478	1.312	1.294	1.311	0.27	7.259	1.312	0.147	0.128	0.145	0.252	7.24	1.294	0.128	0.11	0.127	0.269	7.257	1.311	0.145	0.127	0.143		CPI-SS02EF3E1BA	TNFSF12_TNFRSF12A
CPI-SS079DDF890	TNFSF12_TNFRSF25	simple:O43508	simple:Q93038	TNFSF12	TNFRSF25	TRUE	FALSE	TRUE	I2D	FALSE	0.133	0.076	0.152	0.062	0.059	0.047	0.146	0.09	0.166	0.075	0.073	0.061	0.135	0.079	0.155	0.064	0.062	0.05	0.153	0.097	0.172	0.082	0.08	0.068	0.147	0.091	0.167	0.076	0.074	0.062	0.127	0.071	0.147	0.057	0.054	0.042		CPI-SS0B9B3870A	VEGFA_FLT1
CPI-SS0B0CF0EDF	TNFSF15_TNFRSF25	simple:O95150	simple:Q93038	TNFSF15	TNFRSF25	TRUE	FALSE	TRUE	guidetopharmacology.org	FALSE	0.163	0.107	0.183	0.093	0.09	0.078	0.317	0.261	0.336	0.246	0.244	0.231	0.227	0.171	0.247	0.156	0.154	0.142	0.133	0.076	0.152	0.062	0.059	0.047	0.117	0.061	0.137	0.047	0.044	0.032	0.132	0.076	0.152	0.061	0.059	0.047		CPI-SS02371A6D6	VEGFA_EPHB2
CPI-SS02EF3E1BA	TNFSF12_TNFRSF12A	simple:O43508	simple:Q9NP84	TNFSF12	TNFRSF12A	TRUE	FALSE	TRUE	curated	FALSE	0.536	2.103	0.877	0.543	0.167	1.856	0.549	2.116	0.89	0.557	0.181	1.869	0.538	2.105	0.879	0.546	0.17	1.858	0.556	2.123	0.897	0.564	0.188	1.876	0.55	2.117	0.891	0.558	0.182	1.87	0.531	2.097	0.871	0.538	0.162	1.851		CPI-SS082AD7B6A	FZD6_WNT5A
CPI-SS0B9B3870A	VEGFA_FLT1	simple:P15692	simple:P17948	VEGFA	FLT1	TRUE	FALSE	TRUE	curated	FALSE	2.638	2.624	2.664	2.62	0	2.684	1.369	1.355	1.395	1.351	0	1.415	3.403	3.389	3.429	3.385	0	3.449	4.559	4.545	4.585	4.541	0	4.605	2.195	2.181	2.22	2.177	0	2.241	4.124	4.11	4.15	4.106	0	4.17		CPI-SS02B567BC7	PLXNC1_SEMA7A
CPI-SS02371A6D6	VEGFA_EPHB2	simple:P15692	simple:P29323	VEGFA	EPHB2	TRUE	FALSE	TRUE	I2D	FALSE	2.678	2.83	2.681	2.617	0	0	1.408	1.561	1.412	1.348	0	0	3.443	3.595	3.446	3.382	0	0	4.598	4.751	4.602	4.538	0	0	2.234	2.387	2.238	2.174	0	0	4.163	4.316	4.167	4.103	0	0		CPI-SS070C51D94	FZD7_WNT3
CPI-SS082AD7B6A	FZD6_WNT5A	simple:O60353	simple:P41221	FZD6	WNT5A	TRUE	TRUE	FALSE	curated	FALSE	1.599	0.85	5.702	26.454	25.051	22.172	1.545	0.796	5.648	26.4	24.997	22.118	1.559	0.81	5.662	26.414	25.011	22.133	1.445	0.695	5.547	26.299	24.896	22.018	1.462	0.713	5.565	26.317	24.914	22.035	1.47	0.721	5.573	26.325	24.922	22.043		CPI-SS0F102AAC5	LGR5_RSPO1
CPI-SS02B567BC7	PLXNC1_SEMA7A	simple:O60486	simple:O75326	PLXNC1	SEMA7A	FALSE	TRUE	FALSE	curated	FALSE	0.121	0.732	0.453	0.274	0.143	0.445	0.12	0.731	0.452	0.273	0.142	0.444	0.123	0.734	0.456	0.276	0.146	0.448	0.147	0.758	0.479	0.3	0.169	0.471	0.126	0.737	0.459	0.279	0.148	0.45	0.123	0.734	0.455	0.276	0.145	0.447		CPI-SS0DCA749B0	LGR5_RSPO3
CPI-SS070C51D94	FZD7_WNT3	simple:O75084	simple:P56703	FZD7	WNT3	TRUE	TRUE	FALSE	curated	FALSE	0	0	0	0.083	0.056	0.127	0	0	0	0.054	0.028	0.098	0	0	0	0.051	0.024	0.095	0	0	0	0.044	0.018	0.089	0	0	0	0	0	0	0	0	0	0	0	0		CPI-SS0A874F65F	LGR4_RSPO3
CPI-SS0F102AAC5	LGR5_RSPO1	simple:O75473	simple:Q2MKA7	LGR5	RSPO1	TRUE	TRUE	FALSE	guidetopharmacology.org	FALSE	0	0	0	0.424	0.432	0.432	0	0	0	0.081	0.088	0.088	0	0	0	0.202	0.209	0.209	0	0	0	0.033	0.04	0.04	0	0	0	0.034	0.041	0.041	0	0	0	0	0	0		CPI-SS05B1FA8A8	LRP6_CKLF
CPI-SS0DCA749B0	LGR5_RSPO3	simple:O75473	simple:Q9BXY4	LGR5	RSPO3	TRUE	TRUE	FALSE	guidetopharmacology.org	FALSE	0.55	0.415	0.792	3.357	3.025	2.38	0.207	0.072	0.448	3.014	2.682	2.037	0.327	0.192	0.569	3.134	2.802	2.158	0.159	0.024	0.4	2.966	2.633	1.989	0.159	0.024	0.401	2.966	2.634	1.99	0	0	0	0	0	0		CPI-SS065F7DA2A	COPA_P2RY6
CPI-SS0A874F65F	LGR4_RSPO3	simple:Q9BXB1	simple:Q9BXY4	LGR4	RSPO3	TRUE	TRUE	FALSE	guidetopharmacology.org	FALSE	0.889	0.754	1.13	3.696	3.364	2.719	0.266	0.131	0.507	3.073	2.741	2.096	0.561	0.426	0.802	3.368	3.036	2.391	0.328	0.193	0.57	3.135	2.803	2.159	0.323	0.188	0.565	3.13	2.798	2.153	0.165	0.03	0.406	2.972	2.64	1.995		CPI-SS09A3FA737	NAMPT_P2RY6
CPI-SS05B1FA8A8	LRP6_CKLF	simple:O75581	simple:Q9UBR5	LRP6	CKLF	TRUE	TRUE	FALSE	IMEx,IntAct	FALSE	0.435	0.759	0.433	0.351	0.415	0.522	0.323	0.648	0.321	0.24	0.304	0.411	0.451	0.776	0.449	0.368	0.432	0.539	0.479	0.803	0.477	0.395	0.459	0.566	0.301	0.626	0.299	0.218	0.282	0.389	0.304	0.628	0.302	0.22	0.284	0.391		CPI-SS03E48EFEA	C3_C3AR1
CPI-SS065F7DA2A	COPA_P2RY6	simple:P53621	simple:Q15077	COPA	P2RY6	TRUE	FALSE	TRUE	IMEx,IntAct	FALSE	0.651	0.654	0.653	0	0	0	0.499	0.502	0.501	0	0	0	0.676	0.68	0.679	0	0	0	0.716	0.72	0.719	0	0	0	0.998	1.002	1.001	0	0	0	0.675	0.678	0.677	0	0	0		CPI-SS079728E8B	ADORA2B_ENTPD1
CPI-SS09A3FA737	NAMPT_P2RY6	simple:P43490	simple:Q15077	NAMPT	P2RY6	TRUE	FALSE	TRUE	IMEx,IntAct	FALSE	0.782	0.785	0.784	0	0	0	0.476	0.479	0.478	0	0	0	1.146	1.149	1.148	0	0	0	0.679	0.682	0.681	0	0	0	0.592	0.595	0.594	0	0	0	2.127	2.13	2.129	0	0	0		CPI-SS03E7587E4	ADORA1_ENTPD1
CPI-SS03E48EFEA	C3_C3AR1	simple:P01024	simple:Q16581	C3	C3AR1	TRUE	FALSE	TRUE	guidetopharmacology.org	FALSE	0	0	0	1.297	1.298	0	0	0	0	2.039	2.039	0	0	0	0	2.282	2.283	0	0	0	0	1.066	1.066	0	0	0	0	0.488	0.488	0	0	0	0	1.589	1.59	0		CPI-SS075D9B9AD	KNG1_BDKRB1
CPI-SS079728E8B	ADORA2B_ENTPD1	simple:P29275	simple:P49961	ADORA2B	ENTPD1	FALSE	TRUE	FALSE	curated	FALSE	0.037	0.051	0.109	0.101	0.074	0.022	0.055	0.068	0.127	0.119	0.091	0.04	0.029	0.042	0.101	0.093	0.065	0.014	0.084	0.097	0.156	0.148	0.12	0.069	0.099	0.112	0.171	0.163	0.135	0.084	0.101	0.115	0.173	0.165	0.138	0.086		CPI-SS00689751B	PRL_PRLR
CPI-SS03E7587E4	ADORA1_ENTPD1	simple:P30542	simple:P49961	ADORA1	ENTPD1	FALSE	TRUE	FALSE	curated	FALSE	0	0	0	0	0	0	0.029	0.043	0.101	0.094	0.066	0.015	0	0	0	0	0	0	0.056	0.069	0.127	0.12	0.092	0.041	0.039	0.052	0.111	0.103	0.075	0.024	0	0	0	0	0	0		CPI-SS0483CE4ED	PTHLH_PTH1R
CPI-SS075D9B9AD	KNG1_BDKRB1	simple:P01042	simple:P46663	KNG1	BDKRB1	TRUE	FALSE	TRUE	guidetopharmacology.org	FALSE	0	0.004	0	0.138	0.087	0.162	0	0	0	0	0	0	0	0	0	0	0	0	0	0	0	0	0	0	0	0.013	0	0.147	0.096	0.171	0	0	0	0	0	0		CPI-SS0C6448B94	IL1B_ADRB2
CPI-SS00689751B	PRL_PRLR	simple:P01236	simple:P16471	PRL	PRLR	TRUE	FALSE	TRUE	I2D,IMEx,InnateDB,IntAct	FALSE	0.308	0.265	1.075	5.141	5.126	0.792	0.277	0.234	1.044	5.109	5.094	0.761	0.585	0.542	1.352	5.417	5.402	1.069	1.465	1.422	2.232	6.298	6.283	1.949	3.026	2.983	3.793	7.859	7.843	3.51	0.501	0.458	1.268	5.334	5.319	0.985		CPI-SS0186F8AED	TNFSF9_IL13RA2
CPI-SS0483CE4ED	PTHLH_PTH1R	simple:P12272	simple:Q03431	PTHLH	PTH1R	TRUE	FALSE	TRUE	guidetopharmacology.org	FALSE	0.015	0	0.037	0.067	0.049	0.028	0.046	0	0.068	0.098	0.08	0.059	0.021	0	0.043	0.072	0.054	0.034	0.015	0	0.037	0.066	0.048	0.027	0	0	0	0	0	0	0.323	0	0.345	0.374	0.356	0.336		CPI-SS0BCCDFA7A	NAMPT_IL13RA2
CPI-SS0C6448B94	IL1B_ADRB2	simple:P01584	simple:P07550	IL1B	ADRB2	TRUE	FALSE	TRUE	I2D	FALSE	0.137	0.138	0.145	0	0	0.144	0.341	0.342	0.349	0	0	0.348	0.967	0.969	0.975	0	0	0.975	3.008	3.009	3.016	0	0	3.015	1.776	1.777	1.784	0	0	1.783	2.532	2.533	2.54	0	0	2.539		CPI-SS0431D2256	TNFSF9_TNFRSF9
CPI-SS0186F8AED	TNFSF9_IL13RA2	simple:P41273	simple:Q14627	TNFSF9	IL13RA2	TRUE	FALSE	TRUE	InnateDB-All	FALSE	0	0	0.207	0.327	0.147	3.065	0	0	0.242	0.362	0.182	3.1	0	0	0.196	0.316	0.136	3.054	0	0	0	0	0	0	0	0	0	0	0	0	0	0	0.107	0.227	0.047	2.965		CPI-SS0DC2A6D35	IL6_HRH1
CPI-SS0BCCDFA7A	NAMPT_IL13RA2	simple:P43490	simple:Q14627	NAMPT	IL13RA2	TRUE	FALSE	TRUE	InnateDB-All	FALSE	0	0	0.865	0.986	0.805	3.724	0	0	0.559	0.679	0.499	3.417	0	0	1.229	1.349	1.169	4.087	0	0	0.762	0.883	0.702	3.621	0	0	0.676	0.796	0.615	3.534	0	0	2.21	2.33	2.15	5.068		CPI-SS0B537DD3F	CEACAM5_CEACAM1
CPI-SS0431D2256	TNFSF9_TNFRSF9	simple:P41273	simple:Q07011	TNFSF9	TNFRSF9	TRUE	FALSE	TRUE	curated	FALSE	0	0.122	0.125	0.122	0	0	0	0.157	0.16	0.157	0	0	0	0.111	0.113	0.11	0	0	0	0	0	0	0	0	0	0	0	0	0	0	0	0.022	0.025	0.022	0	0		CPI-SS0AC66088D	CEACAM5_CD1D
CPI-SS0DC2A6D35	IL6_HRH1	simple:P05231	simple:P35367	IL6	HRH1	TRUE	FALSE	TRUE	IMEx,InnateDB-All,IntAct	FALSE	0.573	0.753	0.538	0.219	0.236	0.208	0.477	0.657	0.441	0.122	0.139	0.112	0.647	0.827	0.611	0.293	0.31	0.282	0.463	0.643	0.427	0.108	0.125	0.098	0	0	0	0	0	0	0.616	0.796	0.58	0.262	0.279	0.251		CPI-SS0C85BC9AF	PROS1_AXL
CPI-SS0B537DD3F	CEACAM5_CEACAM1	simple:P06731	simple:P13688	CEACAM5	CEACAM1	TRUE	FALSE	FALSE	curated	FALSE	0.128	0.19	0.118	0.108	0.172	0	2.373	2.434	2.362	2.353	2.416	0	0.776	0.837	0.765	0.756	0.819	0	0.086	0.147	0.075	0.065	0.129	0	0.077	0.139	0.067	0.057	0.121	0	0.062	0.124	0.052	0.042	0.106	0		CPI-SS09C4988F8	PROS1_TYRO3
CPI-SS0AC66088D	CEACAM5_CD1D	simple:P06731	simple:P15813	CEACAM5	CD1D	FALSE	FALSE	FALSE	curated	FALSE	0	0	0	0.087	0.097	0	0	0	0	2.331	2.341	0	0	0	0	0.734	0.744	0	0	0	0	0.044	0.054	0	0	0	0	0.036	0.046	0	0	0	0	0.021	0.031	0		CPI-SS061A7E099	CD55_ADGRE5
CPI-SS0C85BC9AF	PROS1_AXL	simple:P07225	simple:P30530	PROS1	AXL	TRUE	FALSE	TRUE	guidetopharmacology.org	FALSE	0.018	0.05	0.101	0.217	0.068	0.342	0.004	0.036	0.087	0.203	0.054	0.327	0.042	0.074	0.125	0.241	0.092	0.366	0.128	0.16	0.21	0.326	0.178	0.451	0.209	0.241	0.292	0.408	0.259	0.533	0.208	0.24	0.291	0.407	0.258	0.531		CPI-SS07F60834D	MET_HGF
CPI-SS09C4988F8	PROS1_TYRO3	simple:P07225	simple:Q06418	PROS1	TYRO3	TRUE	FALSE	TRUE	guidetopharmacology.org	FALSE	0.039	0.041	0.121	0.113	0.103	0.06	0.025	0.027	0.106	0.098	0.089	0.046	0.063	0.065	0.145	0.137	0.127	0.084	0.149	0.15	0.23	0.222	0.212	0.17	0.23	0.232	0.312	0.304	0.294	0.251	0.229	0.231	0.311	0.303	0.293	0.25		CPI-SS0D954EA1C	PDGFRB_PDGFD
CPI-SS061A7E099	CD55_ADGRE5	simple:P08174	simple:P48960	CD55	ADGRE5	TRUE	TRUE	TRUE	curated	FALSE	8.193	8.255	8.34	8.29	8.306	8.364	10.567	10.629	10.713	10.663	10.679	10.737	6.059	6.122	6.206	6.156	6.172	6.23	2.105	2.167	2.252	2.202	2.218	2.275	1.395	1.457	1.541	1.491	1.507	1.565	1.924	1.986	2.07	2.02	2.036	2.094		CPI-SS08376F0E6	CSF3_CSF3R
CPI-SS07F60834D	MET_HGF	simple:P08581	simple:P14210	MET	HGF	TRUE	TRUE	FALSE	curated	FALSE	0.98	0	0.993	1.038	0.982	1.636	1.697	0	1.71	1.755	1.699	2.353	1.271	0	1.284	1.33	1.273	1.927	0.078	0	0.091	0.136	0.079	0.734	0.041	0	0.054	0.099	0.043	0.697	0.064	0	0.076	0.122	0.065	0.719		CPI-SS0EDAE16B6	EPOR_KITLG
CPI-SS0D954EA1C	PDGFRB_PDGFD	simple:P09619	simple:Q9GZP0	PDGFRB	PDGFD	TRUE	TRUE	FALSE	curated	FALSE	0.15	0.155	0.154	0.208	0.158	0.161	0.018	0.022	0.022	0.076	0.026	0.028	0.58	0.585	0.585	0.639	0.588	0.591	3.55	3.555	3.554	3.608	3.558	3.561	2.007	2.012	2.011	2.065	2.015	2.018	2.049	2.054	2.053	2.107	2.057	2.06		CPI-SS01560CA22	CD99_PILRA
CPI-SS08376F0E6	CSF3_CSF3R	simple:P09919	simple:Q99062	CSF3	CSF3R	TRUE	FALSE	TRUE	curated	FALSE	0	0.029	0.128	0.223	0.064	0.173	0	0	0	0	0	0	0	0.174	0.273	0.368	0.209	0.319	0	0.11	0.209	0.304	0.145	0.255	0	0	0	0	0	0	0	2.114	2.213	2.308	2.149	2.259		CPI-SS03CC15FF3	PDGFRA_PDGFC
CPI-SS0EDAE16B6	EPOR_KITLG	simple:P19235	simple:P21583	EPOR	KITLG	TRUE	TRUE	FALSE	I2D	FALSE	0.078	0.055	0.054	0.047	0.099	0	0.084	0.062	0.06	0.054	0.106	0	0.086	0.063	0.062	0.055	0.107	0	0.176	0.154	0.152	0.146	0.198	0	0.125	0.103	0.101	0.095	0.146	0	0.227	0.204	0.203	0.197	0.248	0		CPI-SS0273C9AED	KDR_VEGFC
CPI-SS01560CA22	CD99_PILRA	simple:P14209	simple:Q9UKJ1	CD99	PILRA	TRUE	FALSE	TRUE	curated	FALSE	1.215	1.214	1.251	1.306	1.256	1.473	1.032	1.032	1.069	1.123	1.074	1.291	0.884	0.883	0.92	0.975	0.926	1.143	2.828	2.827	2.864	2.919	2.87	3.087	3.641	3.64	3.677	3.732	3.683	3.9	0.659	0.658	0.695	0.75	0.701	0.918		CPI-SS0E0DEA7D5	PECAM1_CD38
CPI-SS03CC15FF3	PDGFRA_PDGFC	simple:P16234	simple:Q9NRA1	PDGFRA	PDGFC	TRUE	TRUE	FALSE	curated	FALSE	0.271	0.19	0.275	0.198	0.171	0.232	0.172	0.091	0.176	0.099	0.072	0.133	0.573	0.492	0.577	0.5	0.474	0.534	2.036	1.955	2.04	1.963	1.937	1.997	2.431	2.35	2.435	2.358	2.332	2.392	2.31	2.229	2.314	2.237	2.21	2.271		CPI-SS056AA08CF	EDN2_EDNRA
CPI-SS0273C9AED	KDR_VEGFC	simple:P35968	simple:P49767	KDR	VEGFC	TRUE	TRUE	FALSE	curated	FALSE	0.037	0	0.023	0.03	0.037	0.078	0.019	0	0.006	0.012	0.019	0.06	0.065	0	0.052	0.058	0.066	0.106	0.274	0	0.261	0.267	0.275	0.315	0.08	0	0.066	0.073	0.08	0.121	0.121	0	0.107	0.113	0.121	0.161		CPI-SS01946BE5C	C5AR1_RPS19
CPI-SS0E0DEA7D5	PECAM1_CD38	simple:P16284	simple:P28907	PECAM1	CD38	FALSE	TRUE	TRUE	curated	FALSE	0	0	0.106	0.105	0	0	0	0	0.042	0.042	0	0	0	0	0.075	0.075	0	0	0	0	0.013	0.013	0	0	0	0	0	0	0	0	0	0	0.08	0.079	0	0		CPI-SS04456F441	TNFSF4_TNFRSF4
CPI-SS056AA08CF	EDN2_EDNRA	simple:P20800	simple:P25101	EDN2	EDNRA	TRUE	FALSE	TRUE	guidetopharmacology.org	FALSE	0.04	0.037	0.136	0.371	0.278	0.998	0.254	0.25	0.349	0.585	0.491	1.211	0.115	0.111	0.211	0.446	0.352	1.072	0.029	0.025	0.125	0.36	0.266	0.986	0	0	0	0	0	0	0	0	0	0	0	0		CPI-SS03EACE0E0	MST1_MST1R
CPI-SS01946BE5C	C5AR1_RPS19	simple:P21730	simple:P39019	C5AR1	RPS19	FALSE	TRUE	FALSE	guidetopharmacology.org	FALSE	5.517	8.226	4.512	4.236	4.455	5.089	5.503	8.212	4.498	4.222	4.441	5.075	5.523	8.232	4.518	4.242	4.461	5.095	5.521	8.23	4.516	4.24	4.459	5.093	5.515	8.223	4.51	4.234	4.452	5.086	5.557	8.266	4.552	4.276	4.495	5.129		CPI-SS099C401F7	ACVR2A_INHBE
CPI-SS04456F441	TNFSF4_TNFRSF4	simple:P23510	simple:P43489	TNFSF4	TNFRSF4	FALSE	FALSE	TRUE	curated	FALSE	0	0	0	0	0	0	0	0	0	0	0	0	0	0	0	0	0	0	0.006	0	0.014	0.029	0	0.083	0.008	0	0.017	0.032	0	0.086	0	0	0	0	0	0		CPI-SS0D0252D87	AXL_IL15RA
CPI-SS03EACE0E0	MST1_MST1R	simple:P26927	simple:Q04912	MST1	MST1R	TRUE	FALSE	TRUE	curated	FALSE	0.127	0.175	0.169	0.04	0	0.074	0.116	0.165	0.158	0.03	0	0.063	0.17	0.218	0.212	0.083	0	0.117	0.107	0.155	0.149	0.02	0	0.054	0.12	0.168	0.162	0.033	0	0.067	0.167	0.215	0.209	0.08	0	0.114		CPI-SS077B160B9	IL15_IL15RA
CPI-SS099C401F7	ACVR2A_INHBE	simple:P27037	simple:P58166	ACVR2A	INHBE	TRUE	TRUE	FALSE	curated	FALSE	0	0	0	0.06	0	0	0	0	0	0.099	0	0	0	0	0	0.041	0	0	0	0	0	0.145	0	0	0	0	0	0.14	0	0	0	0	0	0.098	0	0		CPI-SS03A4F7DC8	AXL_GAS6
CPI-SS0D0252D87	AXL_IL15RA	simple:P30530	simple:Q13261	AXL	IL15RA	TRUE	TRUE	TRUE	I2D	FALSE	0.049	0.075	0.062	0.048	0.169	0.01	0.08	0.107	0.094	0.08	0.201	0.041	0.131	0.158	0.145	0.131	0.251	0.092	0.247	0.274	0.261	0.247	0.368	0.208	0.098	0.125	0.112	0.098	0.219	0.059	0.372	0.399	0.385	0.371	0.492	0.333		CPI-SS085195142	TYRO3_GAS6
CPI-SS077B160B9	IL15_IL15RA	simple:P40933	simple:Q13261	IL15	IL15RA	TRUE	FALSE	TRUE	guidetopharmacology.org	FALSE	0.232	0.259	0.245	0.231	0.352	0.193	0.134	0.161	0.148	0.134	0.255	0.095	0.297	0.323	0.31	0.296	0.417	0.258	1.415	1.442	1.429	1.415	1.536	1.377	1.819	1.846	1.833	1.819	1.939	1.78	0.506	0.533	0.519	0.505	0.626	0.467		CPI-SS0415CC75D	MERTK_GAS6
CPI-SS03A4F7DC8	AXL_GAS6	simple:P30530	simple:Q14393	AXL	GAS6	TRUE	TRUE	FALSE	guidetopharmacology.org	FALSE	0.062	0.22	0.064	0.16	0.096	0.093	0.094	0.251	0.096	0.192	0.128	0.125	0.145	0.302	0.147	0.242	0.179	0.175	0.261	0.418	0.263	0.359	0.295	0.292	0.112	0.269	0.114	0.21	0.146	0.143	0.386	0.543	0.387	0.483	0.419	0.416		CPI-SS06CBC985C	LTBR_LTB
CPI-SS085195142	TYRO3_GAS6	simple:Q06418	simple:Q14393	TYRO3	GAS6	TRUE	TRUE	FALSE	guidetopharmacology.org	FALSE	0.083	0.24	0.085	0.181	0.117	0.114	0.085	0.242	0.087	0.182	0.119	0.115	0.165	0.322	0.167	0.262	0.199	0.195	0.157	0.314	0.159	0.254	0.191	0.187	0.147	0.304	0.149	0.244	0.181	0.177	0.104	0.262	0.106	0.202	0.138	0.135		CPI-SS07B3139A0	NMU_NMUR2
CPI-SS0415CC75D	MERTK_GAS6	simple:Q12866	simple:Q14393	MERTK	GAS6	TRUE	TRUE	FALSE	guidetopharmacology.org	FALSE	0.15	0.308	0.152	0.248	0.184	0.181	0.109	0.266	0.111	0.207	0.143	0.139	0.123	0.281	0.125	0.221	0.157	0.154	0.123	0.281	0.125	0.221	0.157	0.154	0.201	0.358	0.203	0.299	0.235	0.232	0	0	0	0	0	0		CPI-SS09CCC0451	INHBE_ACVR2B
CPI-SS06CBC985C	LTBR_LTB	simple:P36941	simple:Q06643	LTBR	LTB	FALSE	TRUE	FALSE	curated	FALSE	0.948	1.677	1.358	0.67	0	0.794	0.976	1.705	1.386	0.698	0	0.822	0.799	1.528	1.209	0.521	0	0.646	0.81	1.539	1.22	0.533	0	0.657	0.785	1.514	1.195	0.507	0	0.632	0.635	1.364	1.045	0.357	0	0.481		CPI-SS06D13FCD3	DSC2_DSG2
CPI-SS07B3139A0	NMU_NMUR2	simple:P48645	simple:Q9GZQ4	NMU	NMUR2	TRUE	FALSE	TRUE	guidetopharmacology.org	FALSE	0.009	0.007	0	0	0	0	0.05	0.048	0	0	0	0	0.024	0.022	0	0	0	0	0	0	0	0	0	0	0.106	0.104	0	0	0	0	0.015	0.013	0	0	0	0		CPI-SS09D5B5F9C	LRP1_ERFE
CPI-SS09CCC0451	INHBE_ACVR2B	simple:P58166	simple:Q13705	INHBE	ACVR2B	TRUE	FALSE	TRUE	curated	FALSE	0	0	0	0	0	0	0	0	0	0	0	0	0	0	0	0	0	0	0.043	0.044	0.052	0.069	0.097	0.042	0	0	0	0	0	0	0	0	0	0	0	0		CPI-SS08C995EB4	CXCL17_GPR35
CPI-SS06D13FCD3	DSC2_DSG2	simple:Q02487	simple:Q14126	DSC2	DSG2	FALSE	FALSE	FALSE	curated	FALSE	2.434	2.927	2.202	0.844	0.835	0.784	2.815	3.308	2.583	1.225	1.216	1.165	2.034	2.528	1.802	0.444	0.435	0.385	1.78	2.273	1.548	0.19	0.181	0.131	1.738	2.231	1.506	0.148	0.139	0.089	1.761	2.254	1.529	0.171	0.162	0.111		CPI-SS00797FD15	EDA_EDA2R
CPI-SS09D5B5F9C	LRP1_ERFE	simple:Q07954	simple:Q4G0M1	LRP1	ERFE	TRUE	TRUE	FALSE	InnateDB-All	FALSE	0	0.121	0	0.05	0.051	0	0	0.115	0	0.044	0.045	0	0	0.339	0	0.268	0.269	0	0	1.02	0	0.949	0.95	0	0	0.845	0	0.774	0.775	0	0	0.948	0	0.878	0.879	0		CPI-SS05A8552D7	EDA_EDAR
CPI-SS08C995EB4	CXCL17_GPR35	simple:Q6UXB2	simple:Q9HC97	CXCL17	GPR35	TRUE	FALSE	TRUE	guidetopharmacology.org	FALSE	0.071	0.079	0	0	0	0	0.173	0.181	0	0	0	0	0.004	0.012	0	0	0	0	0	0	0	0	0	0	0	0	0	0	0	0	0	0	0	0	0	0		CPI-SS04C672963	ESAM_ESAM
CPI-SS00797FD15	EDA_EDA2R	simple:Q92838	simple:Q9HAV5	EDA	EDA2R	TRUE	FALSE	TRUE	guidetopharmacology.org	FALSE	0	0.076	0.077	0.077	0.075	0.092	0	0.012	0.013	0.013	0.01	0.027	0	0.066	0.067	0.067	0.065	0.082	0	0.01	0.011	0.011	0.008	0.025	0	0.02	0.021	0.022	0.019	0.036	0	0	0	0	0	0		CPI-SC01C699B73	COL6A6_a10b1 complex
CPI-SS05A8552D7	EDA_EDAR	simple:Q92838	simple:Q9UNE0	EDA	EDAR	TRUE	FALSE	TRUE	guidetopharmacology.org	FALSE	0	0	0.083	0	0	0	0	0	0.019	0	0	0	0	0	0.073	0	0	0	0	0	0.017	0	0	0	0	0	0.027	0	0	0	0	0	0	0	0	0		CPI-SC07ECBFCA7	COL1A1_a10b1 complex
CPI-SS04C672963	ESAM_ESAM	simple:Q96AP7	simple:Q96AP7	ESAM	ESAM	FALSE	FALSE	FALSE	curated	FALSE	0.009	0	0.01	0	0	0	0	0	0	0	0	0	0.01	0	0.011	0	0	0	0	0	0	0	0	0	0	0	0	0	0	0	0	0	0	0	0	0		CPI-SC067433F6B	COL3A1_a10b1 complex
CPI-SC01C699B73	COL6A6_a10b1 complex	simple:A6NMZ7	complex:a10b1 complex	COL6A6		TRUE	FALSE	FALSE	curated	TRUE	0.027	0.006	0.014	0.005	0	0	0	0	0	0	0	0	0	0	0	0	0	0	0.027	0.005	0.014	0.005	0	0	0.03	0.009	0.017	0.008	0	0	0	0	0	0	0	0		CPI-SC0B6F1A278	COL4A1_a10b1 complex
CPI-SC07ECBFCA7	COL1A1_a10b1 complex	simple:P02452	complex:a10b1 complex	COL1A1		TRUE	FALSE	FALSE	curated	TRUE	0.489	0.467	0.475	0.467	0	0	0.269	0.248	0.256	0.247	0	0	1.925	1.903	1.911	1.903	0	0	9.398	9.376	9.385	9.376	0	0	10.694	10.672	10.68	10.672	0	0	1.143	1.122	1.13	1.122	0	0		CPI-SC0D19BAF15	FN1_a10b1 complex
CPI-SC067433F6B	COL3A1_a10b1 complex	simple:P02461	complex:a10b1 complex	COL3A1		TRUE	FALSE	FALSE	curated	TRUE	1.364	1.342	1.35	1.342	0	0	0.664	0.642	0.65	0.642	0	0	3.955	3.933	3.941	3.933	0	0	32.819	32.798	32.806	32.798	0	0	40.86	40.839	40.847	40.838	0	0	5.492	5.47	5.479	5.47	0	0		CPI-SC0F516B854	COL5A2_a10b1 complex
CPI-SC0B6F1A278	COL4A1_a10b1 complex	simple:P02462	complex:a10b1 complex	COL4A1		TRUE	FALSE	FALSE	curated	TRUE	0.417	0.396	0.404	0.396	0	0	0.383	0.361	0.369	0.361	0	0	2.105	2.084	2.092	2.083	0	0	7.06	7.038	7.047	7.038	0	0	5.2	5.178	5.187	5.178	0	0	10.18	10.158	10.166	10.158	0	0		CPI-SC011F01833	COL1A2_a10b1 complex
CPI-SC0D19BAF15	FN1_a10b1 complex	simple:P02751	complex:a10b1 complex	FN1		TRUE	FALSE	FALSE	curated	TRUE	0.046	0.025	0.033	0.025	0	0	0.153	0.132	0.14	0.131	0	0	0.298	0.276	0.285	0.276	0	0	1.398	1.376	1.384	1.376	0	0	2.104	2.082	2.091	2.082	0	0	0.357	0.336	0.344	0.336	0	0		CPI-SC0FA79E269	COL4A2_a10b1 complex
CPI-SC0F516B854	COL5A2_a10b1 complex	simple:P05997	complex:a10b1 complex	COL5A2		TRUE	FALSE	FALSE	curated	TRUE	0.136	0.114	0.122	0.114	0	0	0.108	0.087	0.095	0.086	0	0	0.424	0.402	0.411	0.402	0	0	3.539	3.517	3.525	3.517	0	0	3.764	3.742	3.751	3.742	0	0	0.912	0.891	0.899	0.891	0	0		CPI-SC04936738A	COL11A1_a10b1 complex
CPI-SC011F01833	COL1A2_a10b1 complex	simple:P08123	complex:a10b1 complex	COL1A2		TRUE	FALSE	FALSE	curated	TRUE	2.199	2.177	2.186	2.177	0	0	0.612	0.591	0.599	0.591	0	0	2.474	2.452	2.461	2.452	0	0	13.56	13.538	13.546	13.538	0	0	17.832	17.81	17.818	17.81	0	0	3.522	3.501	3.509	3.5	0	0		CPI-SC02B111AB0	COL6A1_a10b1 complex
CPI-SC0FA79E269	COL4A2_a10b1 complex	simple:P08572	complex:a10b1 complex	COL4A2		TRUE	FALSE	FALSE	curated	TRUE	0.246	0.225	0.233	0.225	0	0	0.322	0.3	0.309	0.3	0	0	0.993	0.972	0.98	0.972	0	0	2.704	2.682	2.69	2.682	0	0	2.023	2.002	2.01	2.002	0	0	5.604	5.583	5.591	5.582	0	0		CPI-SC0CE851065	COL6A2_a10b1 complex
CPI-SC04936738A	COL11A1_a10b1 complex	simple:P12107	complex:a10b1 complex	COL11A1		TRUE	FALSE	FALSE	curated	TRUE	0	0	0	0	0	0	0	0	0	0	0	0	0	0	0	0	0	0	0	0	0	0	0	0	0	0	0	0	0	0	0	0	0	0	0	0		CPI-SC07375C073	COL6A3_a10b1 complex
CPI-SC02B111AB0	COL6A1_a10b1 complex	simple:P12109	complex:a10b1 complex	COL6A1		TRUE	FALSE	FALSE	curated	TRUE	0.229	0.207	0.216	0.207	0	0	0.443	0.422	0.43	0.421	0	0	0.717	0.695	0.703	0.695	0	0	1.789	1.767	1.776	1.767	0	0	1.162	1.14	1.148	1.14	0	0	1.503	1.481	1.489	1.481	0	0		CPI-SC0D6C777F2	COL11A2_a10b1 complex
CPI-SC0CE851065	COL6A2_a10b1 complex	simple:P12110	complex:a10b1 complex	COL6A2		TRUE	FALSE	FALSE	curated	TRUE	0.127	0.105	0.113	0.105	0	0	0.078	0.057	0.065	0.057	0	0	0.293	0.271	0.279	0.271	0	0	0.969	0.948	0.956	0.948	0	0	0.778	0.756	0.765	0.756	0	0	1.212	1.191	1.199	1.191	0	0		CPI-SC041DEF0FB	COL5A1_a10b1 complex
CPI-SC07375C073	COL6A3_a10b1 complex	simple:P12111	complex:a10b1 complex	COL6A3		TRUE	FALSE	FALSE	curated	TRUE	0.386	0.364	0.372	0.364	0	0	0.115	0.093	0.102	0.093	0	0	1.12	1.099	1.107	1.098	0	0	6.146	6.125	6.133	6.124	0	0	6.176	6.154	6.163	6.154	0	0	3.189	3.167	3.175	3.167	0	0		CPI-SC0C907A888	COL8A2_a10b1 complex
CPI-SC0D6C777F2	COL11A2_a10b1 complex	simple:P13942	complex:a10b1 complex	COL11A2		TRUE	FALSE	FALSE	curated	TRUE	0.028	0.006	0.014	0.006	0	0	0.028	0.007	0.015	0.007	0	0	0	0	0	0	0	0	0.032	0.011	0.019	0.011	0	0	0	0	0	0	0	0	0	0	0	0	0	0		CPI-SC08B1D5269	COL5A3_a10b1 complex
CPI-SC041DEF0FB	COL5A1_a10b1 complex	simple:P20908	complex:a10b1 complex	COL5A1		TRUE	FALSE	FALSE	curated	TRUE	0.282	0.261	0.269	0.261	0	0	0.301	0.28	0.288	0.279	0	0	1.097	1.076	1.084	1.076	0	0	7.102	7.081	7.089	7.081	0	0	5.865	5.843	5.851	5.843	0	0	2.475	2.454	2.462	2.453	0	0		CPI-SC0F8101D41	COL8A1_a10b1 complex
CPI-SC0C907A888	COL8A2_a10b1 complex	simple:P25067	complex:a10b1 complex	COL8A2		TRUE	FALSE	FALSE	curated	TRUE	0.029	0.007	0.016	0.007	0	0	0.031	0.009	0.017	0.009	0	0	0.037	0.016	0.024	0.016	0	0	0.026	0.005	0.013	0.005	0	0	0.031	0.01	0.018	0.009	0	0	0.049	0.028	0.036	0.027	0	0		CPI-SC087556B01	COL4A5_a10b1 complex
CPI-SC08B1D5269	COL5A3_a10b1 complex	simple:P25940	complex:a10b1 complex	COL5A3		TRUE	FALSE	FALSE	curated	TRUE	0.031	0.01	0.018	0.01	0	0	0	0	0	0	0	0	0.045	0.024	0.032	0.024	0	0	0.115	0.094	0.102	0.094	0	0	0.035	0.013	0.021	0.013	0	0	0.094	0.072	0.081	0.072	0	0		CPI-SC08E75294D	COL15A1_a10b1 complex
CPI-SC0F8101D41	COL8A1_a10b1 complex	simple:P27658	complex:a10b1 complex	COL8A1		TRUE	FALSE	FALSE	curated	TRUE	0.035	0.014	0.022	0.014	0	0	0	0	0	0	0	0	0.179	0.157	0.166	0.157	0	0	0.162	0.141	0.149	0.141	0	0	0.107	0.085	0.093	0.085	0	0	0.436	0.415	0.423	0.415	0	0		CPI-SC0017F527E	COL18A1_a10b1 complex
CPI-SC087556B01	COL4A5_a10b1 complex	simple:P29400	complex:a10b1 complex	COL4A5		TRUE	FALSE	FALSE	curated	TRUE	0.12	0.098	0.106	0.098	0	0	0.098	0.076	0.084	0.076	0	0	0.326	0.304	0.313	0.304	0	0	1.349	1.328	1.336	1.327	0	0	1.432	1.41	1.419	1.41	0	0	0.034	0.013	0.021	0.012	0	0		CPI-SC00C0800EB	COL4A4_a10b1 complex
CPI-SC08E75294D	COL15A1_a10b1 complex	simple:P39059	complex:a10b1 complex	COL15A1		TRUE	FALSE	FALSE	curated	TRUE	0.04	0.019	0.027	0.018	0	0	0.04	0.019	0.027	0.018	0	0	0.241	0.22	0.228	0.219	0	0	0.757	0.736	0.744	0.736	0	0	1.026	1.004	1.013	1.004	0	0	0.352	0.33	0.339	0.33	0	0		CPI-SC0A3F146C2	COL4A3_a10b1 complex
CPI-SC0017F527E	COL18A1_a10b1 complex	simple:P39060	complex:a10b1 complex	COL18A1		TRUE	FALSE	FALSE	curated	TRUE	1.419	1.397	1.406	1.397	0	0	0.919	0.897	0.905	0.897	0	0	1.521	1.499	1.507	1.499	0	0	1.818	1.796	1.805	1.796	0	0	1.573	1.551	1.559	1.551	0	0	1.4	1.379	1.387	1.379	0	0		CPI-SC008F4294F	COL7A1_a10b1 complex
CPI-SC00C0800EB	COL4A4_a10b1 complex	simple:P53420	complex:a10b1 complex	COL4A4		TRUE	FALSE	FALSE	curated	TRUE	0.046	0.025	0.033	0.025	0	0	0.089	0.068	0.076	0.068	0	0	0.09	0.069	0.077	0.069	0	0	0	0	0	0	0	0	0.029	0.008	0.016	0.008	0	0	0	0	0	0	0	0		CPI-SC015980AEB	COL14A1_a10b1 complex
CPI-SC0A3F146C2	COL4A3_a10b1 complex	simple:Q01955	complex:a10b1 complex	COL4A3		TRUE	FALSE	FALSE	curated	TRUE	0.039	0.018	0.026	0.017	0	0	0.045	0.023	0.031	0.023	0	0	0.058	0.036	0.044	0.036	0	0	0	0	0	0	0	0	0	0	0	0	0	0	0	0	0	0	0	0		CPI-SC0F94B2CF9	COL16A1_a10b1 complex
CPI-SC008F4294F	COL7A1_a10b1 complex	simple:Q02388	complex:a10b1 complex	COL7A1		TRUE	FALSE	FALSE	curated	TRUE	0.167	0.145	0.153	0.145	0	0	0.196	0.174	0.183	0.174	0	0	1.906	1.885	1.893	1.885	0	0	3.897	3.875	3.883	3.875	0	0	1.665	1.643	1.651	1.643	0	0	9.037	9.016	9.024	9.016	0	0		CPI-SC05565E8CE	COL4A6_a10b1 complex
CPI-SC015980AEB	COL14A1_a10b1 complex	simple:Q05707	complex:a10b1 complex	COL14A1		TRUE	FALSE	FALSE	curated	TRUE	0.419	0.398	0.406	0.398	0	0	0.417	0.395	0.403	0.395	0	0	2.057	2.036	2.044	2.036	0	0	14.24	14.218	14.227	14.218	0	0	14.051	14.03	14.038	14.029	0	0	1.457	1.435	1.444	1.435	0	0		CPI-SC0517A327B	COL9A3_a10b1 complex
CPI-SC0F94B2CF9	COL16A1_a10b1 complex	simple:Q07092	complex:a10b1 complex	COL16A1		TRUE	FALSE	FALSE	curated	TRUE	0.077	0.055	0.063	0.055	0	0	0.158	0.137	0.145	0.137	0	0	0.158	0.136	0.145	0.136	0	0	0.041	0.02	0.028	0.02	0	0	0	0	0	0	0	0	0.162	0.14	0.148	0.14	0	0		CPI-SC067EE23E1	COL9A2_a10b1 complex
CPI-SC05565E8CE	COL4A6_a10b1 complex	simple:Q14031	complex:a10b1 complex	COL4A6		TRUE	FALSE	FALSE	curated	TRUE	0.036	0.015	0.023	0.015	0	0	0.03	0.008	0.016	0.008	0	0	0.142	0.12	0.128	0.12	0	0	0.763	0.741	0.75	0.741	0	0	0.93	0.908	0.917	0.908	0	0	0.091	0.07	0.078	0.069	0	0		CPI-SC090311934	COL24A1_a10b1 complex
CPI-SC0517A327B	COL9A3_a10b1 complex	simple:Q14050	complex:a10b1 complex	COL9A3		TRUE	FALSE	FALSE	curated	TRUE	0.036	0.014	0.023	0.014	0	0	0.031	0.01	0.018	0.01	0	0	0	0	0	0	0	0	0.028	0.007	0.015	0.007	0	0	0.029	0.008	0.016	0.008	0	0	0	0	0	0	0	0		CPI-SC05D8C0EF5	COL28A1_a10b1 complex
CPI-SC067EE23E1	COL9A2_a10b1 complex	simple:Q14055	complex:a10b1 complex	COL9A2		TRUE	FALSE	FALSE	curated	TRUE	0.083	0.062	0.07	0.062	0	0	0.056	0.035	0.043	0.034	0	0	0.11	0.088	0.097	0.088	0	0	0.031	0.009	0.017	0.009	0	0	0	0	0	0	0	0	0	0	0	0	0	0		CPI-SC0725E3A76	COL13A1_a10b1 complex
CPI-SC090311934	COL24A1_a10b1 complex	simple:Q17RW2	complex:a10b1 complex	COL24A1		TRUE	FALSE	FALSE	curated	TRUE	0.055	0.033	0.042	0.033	0	0	0.049	0.027	0.036	0.027	0	0	0.199	0.177	0.185	0.177	0	0	0.611	0.589	0.597	0.589	0	0	0.768	0.746	0.754	0.746	0	0	0.306	0.284	0.292	0.284	0	0		CPI-SC0C9CBDD21	COL27A1_a10b1 complex
CPI-SC05D8C0EF5	COL28A1_a10b1 complex	simple:Q2UY09	complex:a10b1 complex	COL28A1		TRUE	FALSE	FALSE	curated	TRUE	0.051	0.029	0.038	0.029	0	0	0.032	0.01	0.019	0.01	0	0	0.063	0.042	0.05	0.041	0	0	0.041	0.02	0.028	0.02	0	0	0.032	0.01	0.018	0.01	0	0	0.044	0.023	0.031	0.022	0	0		CPI-SC0BA1D5E00	COL22A1_a10b1 complex
CPI-SC0725E3A76	COL13A1_a10b1 complex	simple:Q5TAT6	complex:a10b1 complex	COL13A1		FALSE	FALSE	FALSE	curated	TRUE	0.027	0.005	0.014	0.005	0	0	0.029	0.007	0.015	0.007	0	0	0.035	0.013	0.022	0.013	0	0	0.066	0.045	0.053	0.044	0	0	0.032	0.01	0.019	0.01	0	0	0.175	0.153	0.161	0.153	0	0		CPI-SC0147A8A42	COL26A1_a10b1 complex
CPI-SC0C9CBDD21	COL27A1_a10b1 complex	simple:Q8IZC6	complex:a10b1 complex	COL27A1		TRUE	FALSE	FALSE	curated	TRUE	0.316	0.294	0.303	0.294	0	0	0.188	0.167	0.175	0.166	0	0	0.775	0.754	0.762	0.754	0	0	0.482	0.461	0.469	0.461	0	0	0.409	0.387	0.395	0.387	0	0	0.558	0.537	0.545	0.537	0	0		CPI-SC08938BB1C	COL21A1_a10b1 complex
CPI-SC0BA1D5E00	COL22A1_a10b1 complex	simple:Q8NFW1	complex:a10b1 complex	COL22A1		TRUE	FALSE	FALSE	curated	TRUE	0.036	0.015	0.023	0.014	0	0	0.03	0.008	0.017	0.008	0	0	0	0	0	0	0	0	0	0	0	0	0	0	0	0	0	0	0	0	0.188	0.167	0.175	0.167	0	0		CPI-SC02131C05A	COL12A1_a10b1 complex
CPI-SC0147A8A42	COL26A1_a10b1 complex	simple:Q96A83	complex:a10b1 complex	COL26A1		TRUE	FALSE	FALSE	curated	TRUE	0	0	0	0	0	0	0	0	0	0	0	0	0.031	0.01	0.018	0.009	0	0	0.041	0.02	0.028	0.02	0	0	0.052	0.03	0.038	0.03	0	0	0	0	0	0	0	0		CPI-SC06B4C6DD5	COL17A1_a10b1 complex
CPI-SC08938BB1C	COL21A1_a10b1 complex	simple:Q96P44	complex:a10b1 complex	COL21A1		TRUE	FALSE	FALSE	curated	TRUE	0.027	0.006	0.014	0.006	0	0	0	0	0	0	0	0	0.036	0.015	0.023	0.014	0	0	0.045	0.023	0.031	0.023	0	0	0.056	0.035	0.043	0.035	0	0	0	0	0	0	0	0		CPI-SC07E0348EF	COL6A6_a11b1 complex
CPI-SC02131C05A	COL12A1_a10b1 complex	simple:Q99715	complex:a10b1 complex	COL12A1		TRUE	FALSE	FALSE	curated	TRUE	0.102	0.08	0.089	0.08	0	0	0.183	0.161	0.169	0.161	0	0	0.188	0.166	0.175	0.166	0	0	0.099	0.077	0.086	0.077	0	0	0.065	0.043	0.051	0.043	0	0	0.289	0.268	0.276	0.268	0	0		CPI-SC0F7E26271	COL1A1_a11b1 complex
CPI-SC06B4C6DD5	COL17A1_a10b1 complex	simple:Q9UMD9	complex:a10b1 complex	COL17A1		TRUE	FALSE	FALSE	curated	TRUE	0.196	0.175	0.183	0.175	0	0	0.586	0.565	0.573	0.565	0	0	0.283	0.261	0.269	0.261	0	0	0.03	0.009	0.017	0.008	0	0	0	0	0	0	0	0	0.072	0.051	0.059	0.051	0	0		CPI-SC0A8902C85	COL3A1_a11b1 complex
CPI-SC07E0348EF	COL6A6_a11b1 complex	simple:A6NMZ7	complex:a11b1 complex	COL6A6		TRUE	FALSE	FALSE	curated	TRUE	0	0	0	0.02	0	0.078	0	0	0	0	0	0	0	0	0	0	0	0	0	0	0	0.02	0	0.078	0	0	0	0.023	0	0.081	0	0	0	0	0	0		CPI-SC0A0532ADC	COL4A1_a11b1 complex
CPI-SC0F7E26271	COL1A1_a11b1 complex	simple:P02452	complex:a11b1 complex	COL1A1		TRUE	FALSE	FALSE	curated	TRUE	0	0	0	0.482	0	0.54	0	0	0	0.262	0	0.32	0	0	0	1.917	0	1.976	0	0	0	9.391	0	9.449	0	0	0	10.687	0	10.745	0	0	0	1.136	0	1.195		CPI-SC0CFF5E19D	FN1_a11b1 complex
CPI-SC0A8902C85	COL3A1_a11b1 complex	simple:P02461	complex:a11b1 complex	COL3A1		TRUE	FALSE	FALSE	curated	TRUE	0	0	0	1.357	0	1.415	0	0	0	0.657	0	0.715	0	0	0	3.947	0	4.006	0	0	0	32.812	0	32.871	0	0	0	40.853	0	40.911	0	0	0	5.485	0	5.543		CPI-SC0DF641DAA	COL5A2_a11b1 complex
CPI-SC0A0532ADC	COL4A1_a11b1 complex	simple:P02462	complex:a11b1 complex	COL4A1		TRUE	FALSE	FALSE	curated	TRUE	0	0	0	0.41	0	0.469	0	0	0	0.376	0	0.434	0	0	0	2.098	0	2.156	0	0	0	7.053	0	7.111	0	0	0	5.193	0	5.251	0	0	0	10.172	0	10.231		CPI-SC0681D30FE	COL1A2_a11b1 complex
CPI-SC0CFF5E19D	FN1_a11b1 complex	simple:P02751	complex:a11b1 complex	FN1		TRUE	FALSE	FALSE	curated	TRUE	0	0	0	0.039	0	0.098	0	0	0	0.146	0	0.204	0	0	0	0.291	0	0.349	0	0	0	1.39	0	1.449	0	0	0	2.097	0	2.155	0	0	0	0.35	0	0.409		CPI-SC02017BE74	COL4A2_a11b1 complex
CPI-SC0DF641DAA	COL5A2_a11b1 complex	simple:P05997	complex:a11b1 complex	COL5A2		TRUE	FALSE	FALSE	curated	TRUE	0	0	0	0.128	0	0.187	0	0	0	0.101	0	0.159	0	0	0	0.417	0	0.475	0	0	0	3.531	0	3.59	0	0	0	3.757	0	3.815	0	0	0	0.905	0	0.964		CPI-SC0861656EC	COL11A1_a11b1 complex
CPI-SC0681D30FE	COL1A2_a11b1 complex	simple:P08123	complex:a11b1 complex	COL1A2		TRUE	FALSE	FALSE	curated	TRUE	0	0	0	2.192	0	2.25	0	0	0	0.605	0	0.664	0	0	0	2.467	0	2.525	0	0	0	13.553	0	13.611	0	0	0	17.825	0	17.883	0	0	0	3.515	0	3.573		CPI-SC04085F9F9	COL6A1_a11b1 complex
CPI-SC02017BE74	COL4A2_a11b1 complex	simple:P08572	complex:a11b1 complex	COL4A2		TRUE	FALSE	FALSE	curated	TRUE	0	0	0	0.239	0	0.298	0	0	0	0.315	0	0.373	0	0	0	0.986	0	1.045	0	0	0	2.697	0	2.755	0	0	0	2.016	0	2.075	0	0	0	5.597	0	5.655		CPI-SC0A54B5323	COL6A2_a11b1 complex
CPI-SC0861656EC	COL11A1_a11b1 complex	simple:P12107	complex:a11b1 complex	COL11A1		TRUE	FALSE	FALSE	curated	TRUE	0	0	0	0	0	0	0	0	0	0	0	0	0	0	0	0	0	0	0	0	0	0	0	0	0	0	0	0	0	0	0	0	0	0	0	0		CPI-SC0ECFACED2	COL6A3_a11b1 complex
CPI-SC04085F9F9	COL6A1_a11b1 complex	simple:P12109	complex:a11b1 complex	COL6A1		TRUE	FALSE	FALSE	curated	TRUE	0	0	0	0.222	0	0.28	0	0	0	0.436	0	0.495	0	0	0	0.71	0	0.768	0	0	0	1.782	0	1.84	0	0	0	1.154	0	1.213	0	0	0	1.496	0	1.554		CPI-SC0CA323AE3	COL11A2_a11b1 complex
CPI-SC0A54B5323	COL6A2_a11b1 complex	simple:P12110	complex:a11b1 complex	COL6A2		TRUE	FALSE	FALSE	curated	TRUE	0	0	0	0.12	0	0.178	0	0	0	0.071	0	0.13	0	0	0	0.286	0	0.344	0	0	0	0.962	0	1.021	0	0	0	0.771	0	0.829	0	0	0	1.205	0	1.264		CPI-SC0092846B0	COL5A1_a11b1 complex
CPI-SC0ECFACED2	COL6A3_a11b1 complex	simple:P12111	complex:a11b1 complex	COL6A3		TRUE	FALSE	FALSE	curated	TRUE	0	0	0	0.378	0	0.437	0	0	0	0.108	0	0.166	0	0	0	1.113	0	1.171	0	0	0	6.139	0	6.197	0	0	0	6.169	0	6.227	0	0	0	3.182	0	3.24		CPI-SC08AF9CA91	COL8A2_a11b1 complex
CPI-SC0CA323AE3	COL11A2_a11b1 complex	simple:P13942	complex:a11b1 complex	COL11A2		TRUE	FALSE	FALSE	curated	TRUE	0	0	0	0.021	0	0.079	0	0	0	0.021	0	0.08	0	0	0	0	0	0	0	0	0	0.025	0	0.084	0	0	0	0	0	0	0	0	0	0	0	0		CPI-SC07E958BDE	COL5A3_a11b1 complex
CPI-SC0092846B0	COL5A1_a11b1 complex	simple:P20908	complex:a11b1 complex	COL5A1		TRUE	FALSE	FALSE	curated	TRUE	0	0	0	0.275	0	0.334	0	0	0	0.294	0	0.352	0	0	0	1.09	0	1.149	0	0	0	7.095	0	7.154	0	0	0	5.857	0	5.916	0	0	0	2.468	0	2.526		CPI-SC08CC68F11	COL8A1_a11b1 complex
CPI-SC08AF9CA91	COL8A2_a11b1 complex	simple:P25067	complex:a11b1 complex	COL8A2		TRUE	FALSE	FALSE	curated	TRUE	0	0	0	0.022	0	0.08	0	0	0	0.024	0	0.082	0	0	0	0.03	0	0.089	0	0	0	0.019	0	0.078	0	0	0	0.024	0	0.082	0	0	0	0.042	0	0.1		CPI-SC0CE433AB8	COL4A5_a11b1 complex
CPI-SC07E958BDE	COL5A3_a11b1 complex	simple:P25940	complex:a11b1 complex	COL5A3		TRUE	FALSE	FALSE	curated	TRUE	0	0	0	0.024	0	0.083	0	0	0	0	0	0	0	0	0	0.038	0	0.097	0	0	0	0.108	0	0.167	0	0	0	0.027	0	0.086	0	0	0	0.087	0	0.145		CPI-SC03BFF1D95	COL15A1_a11b1 complex
CPI-SC08CC68F11	COL8A1_a11b1 complex	simple:P27658	complex:a11b1 complex	COL8A1		TRUE	FALSE	FALSE	curated	TRUE	0	0	0	0.028	0	0.087	0	0	0	0	0	0	0	0	0	0.172	0	0.23	0	0	0	0.155	0	0.214	0	0	0	0.1	0	0.158	0	0	0	0.429	0	0.488		CPI-SC03ADD2063	COL18A1_a11b1 complex
CPI-SC0CE433AB8	COL4A5_a11b1 complex	simple:P29400	complex:a11b1 complex	COL4A5		TRUE	FALSE	FALSE	curated	TRUE	0	0	0	0.112	0	0.171	0	0	0	0.09	0	0.149	0	0	0	0.319	0	0.377	0	0	0	1.342	0	1.4	0	0	0	1.425	0	1.483	0	0	0	0.027	0	0.085		CPI-SC0082A7233	COL4A4_a11b1 complex
CPI-SC03BFF1D95	COL15A1_a11b1 complex	simple:P39059	complex:a11b1 complex	COL15A1		TRUE	FALSE	FALSE	curated	TRUE	0	0	0	0.033	0	0.091	0	0	0	0.033	0	0.091	0	0	0	0.234	0	0.292	0	0	0	0.75	0	0.809	0	0	0	1.019	0	1.077	0	0	0	0.345	0	0.403		CPI-SC0674C647E	COL4A3_a11b1 complex
CPI-SC03ADD2063	COL18A1_a11b1 complex	simple:P39060	complex:a11b1 complex	COL18A1		TRUE	FALSE	FALSE	curated	TRUE	0	0	0	1.412	0	1.47	0	0	0	0.911	0	0.97	0	0	0	1.513	0	1.572	0	0	0	1.811	0	1.869	0	0	0	1.565	0	1.624	0	0	0	1.393	0	1.452		CPI-SC03D71E025	COL7A1_a11b1 complex
CPI-SC0082A7233	COL4A4_a11b1 complex	simple:P53420	complex:a11b1 complex	COL4A4		TRUE	FALSE	FALSE	curated	TRUE	0	0	0	0.039	0	0.098	0	0	0	0.082	0	0.141	0	0	0	0.083	0	0.142	0	0	0	0	0	0	0	0	0	0.022	0	0.081	0	0	0	0	0	0		CPI-SC060984F83	COL14A1_a11b1 complex
CPI-SC0674C647E	COL4A3_a11b1 complex	simple:Q01955	complex:a11b1 complex	COL4A3		TRUE	FALSE	FALSE	curated	TRUE	0	0	0	0.032	0	0.09	0	0	0	0.038	0	0.096	0	0	0	0.05	0	0.109	0	0	0	0	0	0	0	0	0	0	0	0	0	0	0	0	0	0		CPI-SC0014D5A6E	COL16A1_a11b1 complex
CPI-SC03D71E025	COL7A1_a11b1 complex	simple:Q02388	complex:a11b1 complex	COL7A1		TRUE	FALSE	FALSE	curated	TRUE	0	0	0	0.159	0	0.218	0	0	0	0.189	0	0.247	0	0	0	1.899	0	1.958	0	0	0	3.89	0	3.948	0	0	0	1.658	0	1.716	0	0	0	9.03	0	9.089		CPI-SC0B066E03C	COL4A6_a11b1 complex
CPI-SC060984F83	COL14A1_a11b1 complex	simple:Q05707	complex:a11b1 complex	COL14A1		TRUE	FALSE	FALSE	curated	TRUE	0	0	0	0.412	0	0.471	0	0	0	0.409	0	0.468	0	0	0	2.05	0	2.109	0	0	0	14.233	0	14.291	0	0	0	14.044	0	14.102	0	0	0	1.45	0	1.508		CPI-SC0B4BD965C	COL9A3_a11b1 complex
CPI-SC0014D5A6E	COL16A1_a11b1 complex	simple:Q07092	complex:a11b1 complex	COL16A1		TRUE	FALSE	FALSE	curated	TRUE	0	0	0	0.069	0	0.128	0	0	0	0.151	0	0.21	0	0	0	0.151	0	0.209	0	0	0	0.034	0	0.093	0	0	0	0	0	0	0	0	0	0.154	0	0.213		CPI-SC0247E9ADB	COL9A2_a11b1 complex
CPI-SC0B066E03C	COL4A6_a11b1 complex	simple:Q14031	complex:a11b1 complex	COL4A6		TRUE	FALSE	FALSE	curated	TRUE	0	0	0	0.029	0	0.088	0	0	0	0.022	0	0.081	0	0	0	0.134	0	0.193	0	0	0	0.756	0	0.814	0	0	0	0.923	0	0.981	0	0	0	0.084	0	0.142		CPI-SC06ACCFA52	COL24A1_a11b1 complex
CPI-SC0B4BD965C	COL9A3_a11b1 complex	simple:Q14050	complex:a11b1 complex	COL9A3		TRUE	FALSE	FALSE	curated	TRUE	0	0	0	0.029	0	0.087	0	0	0	0.024	0	0.083	0	0	0	0	0	0	0	0	0	0.021	0	0.08	0	0	0	0.022	0	0.081	0	0	0	0	0	0		CPI-SC069F9E62C	COL28A1_a11b1 complex
CPI-SC0247E9ADB	COL9A2_a11b1 complex	simple:Q14055	complex:a11b1 complex	COL9A2		TRUE	FALSE	FALSE	curated	TRUE	0	0	0	0.076	0	0.135	0	0	0	0.049	0	0.107	0	0	0	0.103	0	0.161	0	0	0	0.024	0	0.082	0	0	0	0	0	0	0	0	0	0	0	0		CPI-SC0D2BDC009	COL13A1_a11b1 complex
CPI-SC06ACCFA52	COL24A1_a11b1 complex	simple:Q17RW2	complex:a11b1 complex	COL24A1		TRUE	FALSE	FALSE	curated	TRUE	0	0	0	0.048	0	0.106	0	0	0	0.042	0	0.1	0	0	0	0.192	0	0.25	0	0	0	0.603	0	0.662	0	0	0	0.76	0	0.819	0	0	0	0.298	0	0.357		CPI-SC05F111D21	COL27A1_a11b1 complex
CPI-SC069F9E62C	COL28A1_a11b1 complex	simple:Q2UY09	complex:a11b1 complex	COL28A1		TRUE	FALSE	FALSE	curated	TRUE	0	0	0	0.044	0	0.102	0	0	0	0.025	0	0.083	0	0	0	0.056	0	0.114	0	0	0	0.034	0	0.093	0	0	0	0.024	0	0.083	0	0	0	0.037	0	0.095		CPI-SC0BCD683D4	COL22A1_a11b1 complex
CPI-SC0D2BDC009	COL13A1_a11b1 complex	simple:Q5TAT6	complex:a11b1 complex	COL13A1		FALSE	FALSE	FALSE	curated	TRUE	0	0	0	0.02	0	0.078	0	0	0	0.021	0	0.08	0	0	0	0.028	0	0.086	0	0	0	0.059	0	0.118	0	0	0	0.025	0	0.083	0	0	0	0.168	0	0.226		CPI-SC041215790	COL26A1_a11b1 complex
CPI-SC05F111D21	COL27A1_a11b1 complex	simple:Q8IZC6	complex:a11b1 complex	COL27A1		TRUE	FALSE	FALSE	curated	TRUE	0	0	0	0.309	0	0.367	0	0	0	0.181	0	0.239	0	0	0	0.768	0	0.827	0	0	0	0.475	0	0.534	0	0	0	0.402	0	0.46	0	0	0	0.551	0	0.61		CPI-SC037C3901A	COL21A1_a11b1 complex
CPI-SC0BCD683D4	COL22A1_a11b1 complex	simple:Q8NFW1	complex:a11b1 complex	COL22A1		TRUE	FALSE	FALSE	curated	TRUE	0	0	0	0.029	0	0.087	0	0	0	0.023	0	0.081	0	0	0	0	0	0	0	0	0	0	0	0	0	0	0	0	0	0	0	0	0	0.181	0	0.24		CPI-SC05B2AA866	COL12A1_a11b1 complex
CPI-SC041215790	COL26A1_a11b1 complex	simple:Q96A83	complex:a11b1 complex	COL26A1		TRUE	FALSE	FALSE	curated	TRUE	0	0	0	0	0	0	0	0	0	0	0	0	0	0	0	0.024	0	0.083	0	0	0	0.034	0	0.093	0	0	0	0.044	0	0.103	0	0	0	0	0	0		CPI-SC0247375A7	COL17A1_a11b1 complex
CPI-SC037C3901A	COL21A1_a11b1 complex	simple:Q96P44	complex:a11b1 complex	COL21A1		TRUE	FALSE	FALSE	curated	TRUE	0	0	0	0.02	0	0.079	0	0	0	0	0	0	0	0	0	0.029	0	0.087	0	0	0	0.038	0	0.096	0	0	0	0.049	0	0.108	0	0	0	0	0	0		CPI-SC0B808E56A	COL6A6_a1b1 complex
CPI-SC05B2AA866	COL12A1_a11b1 complex	simple:Q99715	complex:a11b1 complex	COL12A1		TRUE	FALSE	FALSE	curated	TRUE	0	0	0	0.095	0	0.153	0	0	0	0.176	0	0.234	0	0	0	0.181	0	0.239	0	0	0	0.092	0	0.15	0	0	0	0.057	0	0.116	0	0	0	0.282	0	0.341		CPI-SC0F73E9099	COL1A1_a1b1 complex
CPI-SC0247375A7	COL17A1_a11b1 complex	simple:Q9UMD9	complex:a11b1 complex	COL17A1		TRUE	FALSE	FALSE	curated	TRUE	0	0	0	0.189	0	0.248	0	0	0	0.579	0	0.638	0	0	0	0.275	0	0.334	0	0	0	0.023	0	0.081	0	0	0	0	0	0	0	0	0	0.065	0	0.124		CPI-SC0BC63F8C0	COL3A1_a1b1 complex
CPI-SC0B808E56A	COL6A6_a1b1 complex	simple:A6NMZ7	complex:a1b1 complex	COL6A6		TRUE	FALSE	FALSE	curated	TRUE	0.191	0.189	0.856	3.461	3.602	2.321	0	0	0	0	0	0	0	0	0	0	0	0	0.191	0.189	0.856	3.461	3.602	2.32	0.194	0.192	0.859	3.464	3.605	2.324	0	0	0	0	0	0		CPI-SC0672FBD31	COL4A1_a1b1 complex
CPI-SC0F73E9099	COL1A1_a1b1 complex	simple:P02452	complex:a1b1 complex	COL1A1		TRUE	FALSE	FALSE	curated	TRUE	0.653	0.65	1.317	3.923	4.064	2.782	0.434	0.431	1.098	3.703	3.844	2.563	2.089	2.086	2.753	5.358	5.5	4.218	9.562	9.56	10.227	12.832	12.973	11.691	10.858	10.855	11.522	14.128	14.269	12.987	1.308	1.305	1.972	4.577	4.718	3.437		CPI-SC0545E2502	COL5A2_a1b1 complex
CPI-SC0BC63F8C0	COL3A1_a1b1 complex	simple:P02461	complex:a1b1 complex	COL3A1		TRUE	FALSE	FALSE	curated	TRUE	1.528	1.525	2.192	4.798	4.939	3.657	0.828	0.825	1.492	4.098	4.239	2.957	4.119	4.116	4.783	7.388	7.53	6.248	32.984	32.981	33.648	36.253	36.394	35.113	41.025	41.022	41.689	44.294	44.435	43.154	5.656	5.654	6.321	8.926	9.067	7.785		CPI-SC006E22794	COL1A2_a1b1 complex
CPI-SC0672FBD31	COL4A1_a1b1 complex	simple:P02462	complex:a1b1 complex	COL4A1		TRUE	FALSE	FALSE	curated	TRUE	0.582	0.579	1.246	3.851	3.992	2.711	0.547	0.544	1.211	3.817	3.958	2.676	2.269	2.267	2.934	5.539	5.68	4.399	7.224	7.222	7.889	10.494	10.635	9.353	5.364	5.362	6.029	8.634	8.775	7.493	10.344	10.341	11.008	13.613	13.754	12.473		CPI-SC0458F68A5	COL4A2_a1b1 complex
CPI-SC0545E2502	COL5A2_a1b1 complex	simple:P05997	complex:a1b1 complex	COL5A2		TRUE	FALSE	FALSE	curated	TRUE	0.3	0.297	0.964	3.569	3.71	2.429	0.272	0.27	0.937	3.542	3.683	2.402	0.588	0.586	1.253	3.858	3.999	2.717	3.703	3.7	4.367	6.972	7.114	5.832	3.928	3.926	4.592	7.198	7.339	6.057	1.077	1.074	1.741	4.346	4.487	3.206		CPI-SC06E5E0C83	COL11A1_a1b1 complex
CPI-SC006E22794	COL1A2_a1b1 complex	simple:P08123	complex:a1b1 complex	COL1A2		TRUE	FALSE	FALSE	curated	TRUE	2.363	2.361	3.028	5.633	5.774	4.492	0.777	0.774	1.441	4.046	4.187	2.906	2.638	2.636	3.303	5.908	6.049	4.767	13.724	13.721	14.388	16.993	17.135	15.853	17.996	17.993	18.66	21.266	21.407	20.125	3.686	3.684	4.351	6.956	7.097	5.816		CPI-SC09FDA4F45	COL6A1_a1b1 complex
CPI-SC0458F68A5	COL4A2_a1b1 complex	simple:P08572	complex:a1b1 complex	COL4A2		TRUE	FALSE	FALSE	curated	TRUE	0.411	0.408	1.075	3.68	3.821	2.54	0.486	0.484	1.15	3.756	3.897	2.615	1.158	1.155	1.822	4.427	4.568	3.287	2.868	2.865	3.532	6.138	6.279	4.997	2.188	2.185	2.852	5.457	5.598	4.317	5.769	5.766	6.433	9.038	9.179	7.898		CPI-SC0F4BC2909	COL6A2_a1b1 complex
CPI-SC06E5E0C83	COL11A1_a1b1 complex	simple:P12107	complex:a1b1 complex	COL11A1		TRUE	FALSE	FALSE	curated	TRUE	0	0	0	0	0	0	0	0	0	0	0	0	0	0	0	0	0	0	0	0	0	0	0	0	0	0	0	0	0	0	0	0	0	0	0	0		CPI-SC02AE206BE	COL6A3_a1b1 complex
CPI-SC09FDA4F45	COL6A1_a1b1 complex	simple:P12109	complex:a1b1 complex	COL6A1		TRUE	FALSE	FALSE	curated	TRUE	0.393	0.391	1.058	3.663	3.804	2.522	0.608	0.605	1.272	3.877	4.018	2.737	0.881	0.878	1.545	4.151	4.292	3.01	1.953	1.951	2.617	5.223	5.364	4.082	1.326	1.323	1.99	4.595	4.737	3.455	1.667	1.664	2.331	4.937	5.078	3.796		CPI-SC0A8E69BC5	COL11A2_a1b1 complex
CPI-SC0F4BC2909	COL6A2_a1b1 complex	simple:P12110	complex:a1b1 complex	COL6A2		TRUE	FALSE	FALSE	curated	TRUE	0.291	0.288	0.955	3.561	3.702	2.42	0.243	0.24	0.907	3.512	3.653	2.372	0.457	0.454	1.121	3.727	3.868	2.586	1.134	1.131	1.798	4.403	4.544	3.263	0.942	0.94	1.607	4.212	4.353	3.072	1.377	1.374	2.041	4.646	4.787	3.506		CPI-SC05992FDC8	COL5A1_a1b1 complex
CPI-SC02AE206BE	COL6A3_a1b1 complex	simple:P12111	complex:a1b1 complex	COL6A3		TRUE	FALSE	FALSE	curated	TRUE	0.55	0.547	1.214	3.819	3.96	2.679	0.279	0.277	0.944	3.549	3.69	2.408	1.285	1.282	1.949	4.554	4.695	3.414	6.311	6.308	6.975	9.58	9.721	8.44	6.34	6.338	7.004	9.61	9.751	8.469	3.353	3.351	4.017	6.623	6.764	5.482		CPI-SC069F95780	COL8A2_a1b1 complex
CPI-SC0A8E69BC5	COL11A2_a1b1 complex	simple:P13942	complex:a1b1 complex	COL11A2		TRUE	FALSE	FALSE	curated	TRUE	0.192	0.189	0.856	3.462	3.603	2.321	0.193	0.19	0.857	3.462	3.603	2.322	0	0	0	0	0	0	0.197	0.194	0.861	3.466	3.607	2.326	0	0	0	0	0	0	0	0	0	0	0	0		CPI-SC0DAD29856	COL5A3_a1b1 complex
CPI-SC05992FDC8	COL5A1_a1b1 complex	simple:P20908	complex:a1b1 complex	COL5A1		TRUE	FALSE	FALSE	curated	TRUE	0.447	0.444	1.111	3.716	3.857	2.576	0.466	0.463	1.13	3.735	3.876	2.595	1.262	1.259	1.926	4.531	4.672	3.391	7.267	7.264	7.931	10.536	10.677	9.396	6.029	6.026	6.693	9.298	9.439	8.158	2.64	2.637	3.304	5.909	6.05	4.769		CPI-SC02F06FF62	COL8A1_a1b1 complex
CPI-SC069F95780	COL8A2_a1b1 complex	simple:P25067	complex:a1b1 complex	COL8A2		TRUE	FALSE	FALSE	curated	TRUE	0.193	0.191	0.858	3.463	3.604	2.322	0.195	0.192	0.859	3.465	3.606	2.324	0.202	0.199	0.866	3.471	3.612	2.331	0.191	0.188	0.855	3.46	3.601	2.32	0.196	0.193	0.86	3.465	3.606	2.325	0.214	0.211	0.878	3.483	3.624	2.343		CPI-SC0EC572716	COL4A5_a1b1 complex
CPI-SC0DAD29856	COL5A3_a1b1 complex	simple:P25940	complex:a1b1 complex	COL5A3		TRUE	FALSE	FALSE	curated	TRUE	0.196	0.193	0.86	3.465	3.606	2.325	0	0	0	0	0	0	0.21	0.207	0.874	3.479	3.62	2.339	0.28	0.277	0.944	3.549	3.69	2.409	0.199	0.196	0.863	3.468	3.609	2.328	0.258	0.256	0.923	3.528	3.669	2.387		CPI-SC0F8D27FBC	COL15A1_a1b1 complex
CPI-SC02F06FF62	COL8A1_a1b1 complex	simple:P27658	complex:a1b1 complex	COL8A1		TRUE	FALSE	FALSE	curated	TRUE	0.2	0.197	0.864	3.469	3.61	2.329	0	0	0	0	0	0	0.343	0.341	1.008	3.613	3.754	2.472	0.327	0.324	0.991	3.596	3.737	2.456	0.271	0.268	0.935	3.54	3.682	2.4	0.601	0.598	1.265	3.87	4.011	2.73		CPI-SC0EA3FC100	COL18A1_a1b1 complex
CPI-SC0EC572716	COL4A5_a1b1 complex	simple:P29400	complex:a1b1 complex	COL4A5		TRUE	FALSE	FALSE	curated	TRUE	0.284	0.281	0.948	3.553	3.694	2.413	0.262	0.259	0.926	3.531	3.673	2.391	0.49	0.488	1.155	3.76	3.901	2.619	1.513	1.511	2.178	4.783	4.924	3.643	1.596	1.594	2.261	4.866	5.007	3.725	0.199	0.196	0.863	3.468	3.609	2.328		CPI-SC091173D82	COL4A4_a1b1 complex
CPI-SC0F8D27FBC	COL15A1_a1b1 complex	simple:P39059	complex:a1b1 complex	COL15A1		TRUE	FALSE	FALSE	curated	TRUE	0.205	0.202	0.869	3.474	3.615	2.334	0.205	0.202	0.869	3.474	3.615	2.334	0.406	0.403	1.07	3.675	3.816	2.535	0.922	0.919	1.586	4.191	4.332	3.051	1.19	1.188	1.855	4.46	4.601	3.319	0.516	0.514	1.181	3.786	3.927	2.645		CPI-SC07FB88720	COL4A3_a1b1 complex
CPI-SC0EA3FC100	COL18A1_a1b1 complex	simple:P39060	complex:a1b1 complex	COL18A1		TRUE	FALSE	FALSE	curated	TRUE	1.583	1.581	2.248	4.853	4.994	3.712	1.083	1.08	1.747	4.352	4.494	3.212	1.685	1.682	2.349	4.954	5.096	3.814	1.982	1.98	2.647	5.252	5.393	4.112	1.737	1.734	2.401	5.006	5.148	3.866	1.565	1.562	2.229	4.834	4.975	3.694		CPI-SC035953E6B	COL7A1_a1b1 complex
CPI-SC091173D82	COL4A4_a1b1 complex	simple:P53420	complex:a1b1 complex	COL4A4		TRUE	FALSE	FALSE	curated	TRUE	0.211	0.208	0.875	3.48	3.621	2.34	0.254	0.251	0.918	3.523	3.664	2.383	0.255	0.252	0.919	3.524	3.665	2.384	0	0	0	0	0	0	0.194	0.191	0.858	3.463	3.604	2.323	0	0	0	0	0	0		CPI-SC0BD4C290F	COL14A1_a1b1 complex
CPI-SC07FB88720	COL4A3_a1b1 complex	simple:Q01955	complex:a1b1 complex	COL4A3		TRUE	FALSE	FALSE	curated	TRUE	0.204	0.201	0.868	3.473	3.614	2.333	0.209	0.207	0.873	3.479	3.62	2.338	0.222	0.219	0.886	3.491	3.633	2.351	0	0	0	0	0	0	0	0	0	0	0	0	0	0	0	0	0	0		CPI-SC053BBE2B1	COL16A1_a1b1 complex
CPI-SC035953E6B	COL7A1_a1b1 complex	simple:Q02388	complex:a1b1 complex	COL7A1		TRUE	FALSE	FALSE	curated	TRUE	0.331	0.328	0.995	3.6	3.741	2.46	0.36	0.358	1.025	3.63	3.771	2.49	2.071	2.068	2.735	5.34	5.481	4.2	4.061	4.058	4.725	7.331	7.472	6.19	1.829	1.826	2.493	5.099	5.24	3.958	9.202	9.199	9.866	12.471	12.612	11.331		CPI-SC0DA5EFA18	COL4A6_a1b1 complex
CPI-SC0BD4C290F	COL14A1_a1b1 complex	simple:Q05707	complex:a1b1 complex	COL14A1		TRUE	FALSE	FALSE	curated	TRUE	0.584	0.581	1.248	3.853	3.994	2.713	0.581	0.578	1.245	3.85	3.991	2.71	2.222	2.219	2.886	5.491	5.632	4.351	14.404	14.402	15.069	17.674	17.815	16.533	14.215	14.213	14.88	17.485	17.626	16.345	1.621	1.619	2.286	4.891	5.032	3.75		CPI-SC0F778DC8E	COL9A3_a1b1 complex
CPI-SC053BBE2B1	COL16A1_a1b1 complex	simple:Q07092	complex:a1b1 complex	COL16A1		TRUE	FALSE	FALSE	curated	TRUE	0.241	0.238	0.905	3.51	3.652	2.37	0.323	0.32	0.987	3.592	3.733	2.452	0.322	0.32	0.987	3.592	3.733	2.451	0.206	0.203	0.87	3.475	3.616	2.335	0	0	0	0	0	0	0.326	0.323	0.99	3.595	3.737	2.455		CPI-SC0F590482E	COL9A2_a1b1 complex
CPI-SC0DA5EFA18	COL4A6_a1b1 complex	simple:Q14031	complex:a1b1 complex	COL4A6		TRUE	FALSE	FALSE	curated	TRUE	0.201	0.198	0.865	3.47	3.611	2.33	0.194	0.191	0.858	3.463	3.605	2.323	0.306	0.303	0.97	3.575	3.717	2.435	0.927	0.925	1.592	4.197	4.338	3.056	1.094	1.092	1.758	4.364	4.505	3.223	0.256	0.253	0.92	3.525	3.666	2.385		CPI-SC090DB3159	COL24A1_a1b1 complex
CPI-SC0F778DC8E	COL9A3_a1b1 complex	simple:Q14050	complex:a1b1 complex	COL9A3		TRUE	FALSE	FALSE	curated	TRUE	0.2	0.198	0.865	3.47	3.611	2.33	0.196	0.193	0.86	3.465	3.606	2.325	0	0	0	0	0	0	0.193	0.19	0.857	3.462	3.603	2.322	0.194	0.191	0.858	3.463	3.604	2.323	0	0	0	0	0	0		CPI-SC0FF018913	COL28A1_a1b1 complex
CPI-SC0F590482E	COL9A2_a1b1 complex	simple:Q14055	complex:a1b1 complex	COL9A2		TRUE	FALSE	FALSE	curated	TRUE	0.248	0.245	0.912	3.517	3.658	2.377	0.221	0.218	0.885	3.49	3.631	2.35	0.274	0.272	0.939	3.544	3.685	2.403	0.195	0.192	0.859	3.464	3.606	2.324	0	0	0	0	0	0	0	0	0	0	0	0		CPI-SC08BF895FC	COL13A1_a1b1 complex
CPI-SC090DB3159	COL24A1_a1b1 complex	simple:Q17RW2	complex:a1b1 complex	COL24A1		TRUE	FALSE	FALSE	curated	TRUE	0.219	0.217	0.884	3.489	3.63	2.348	0.213	0.211	0.877	3.483	3.624	2.342	0.363	0.361	1.027	3.633	3.774	2.492	0.775	0.772	1.439	4.044	4.186	2.904	0.932	0.929	1.596	4.201	4.343	3.061	0.47	0.467	1.134	3.739	3.88	2.599		CPI-SC0D7F33CFB	COL27A1_a1b1 complex
CPI-SC0FF018913	COL28A1_a1b1 complex	simple:Q2UY09	complex:a1b1 complex	COL28A1		TRUE	FALSE	FALSE	curated	TRUE	0.215	0.213	0.88	3.485	3.626	2.344	0.196	0.194	0.861	3.466	3.607	2.325	0.228	0.225	0.892	3.497	3.638	2.357	0.206	0.203	0.87	3.475	3.616	2.335	0.196	0.193	0.86	3.465	3.607	2.325	0.208	0.206	0.873	3.478	3.619	2.338		CPI-SC040B3EFBC	COL22A1_a1b1 complex
CPI-SC08BF895FC	COL13A1_a1b1 complex	simple:Q5TAT6	complex:a1b1 complex	COL13A1		FALSE	FALSE	FALSE	curated	TRUE	0.191	0.189	0.856	3.461	3.602	2.32	0.193	0.19	0.857	3.462	3.604	2.322	0.199	0.197	0.863	3.469	3.61	2.328	0.231	0.228	0.895	3.5	3.641	2.36	0.196	0.194	0.86	3.466	3.607	2.325	0.339	0.336	1.003	3.609	3.75	2.468		CPI-SC0EACF2D60	COL26A1_a1b1 complex
CPI-SC0D7F33CFB	COL27A1_a1b1 complex	simple:Q8IZC6	complex:a1b1 complex	COL27A1		TRUE	FALSE	FALSE	curated	TRUE	0.48	0.478	1.145	3.75	3.891	2.609	0.353	0.35	1.017	3.622	3.763	2.482	0.94	0.937	1.604	4.209	4.35	3.069	0.647	0.644	1.311	3.916	4.057	2.776	0.573	0.57	1.237	3.843	3.984	2.702	0.723	0.72	1.387	3.992	4.133	2.852		CPI-SC09C06C70F	COL21A1_a1b1 complex
CPI-SC040B3EFBC	COL22A1_a1b1 complex	simple:Q8NFW1	complex:a1b1 complex	COL22A1		TRUE	FALSE	FALSE	curated	TRUE	0.201	0.198	0.865	3.47	3.611	2.33	0.194	0.192	0.859	3.464	3.605	2.323	0	0	0	0	0	0	0	0	0	0	0	0	0	0	0	0	0	0	0.353	0.35	1.017	3.622	3.763	2.482		CPI-SC004A436C5	COL12A1_a1b1 complex
CPI-SC0EACF2D60	COL26A1_a1b1 complex	simple:Q96A83	complex:a1b1 complex	COL26A1		TRUE	FALSE	FALSE	curated	TRUE	0	0	0	0	0	0	0	0	0	0	0	0	0.196	0.193	0.86	3.465	3.606	2.325	0.206	0.203	0.87	3.475	3.616	2.335	0.216	0.213	0.88	3.485	3.627	2.345	0	0	0	0	0	0		CPI-SC08AA91C84	COL17A1_a1b1 complex
CPI-SC09C06C70F	COL21A1_a1b1 complex	simple:Q96P44	complex:a1b1 complex	COL21A1		TRUE	FALSE	FALSE	curated	TRUE	0.192	0.189	0.856	3.461	3.602	2.321	0	0	0	0	0	0	0.2	0.198	0.865	3.47	3.611	2.33	0.209	0.207	0.873	3.479	3.62	2.338	0.221	0.218	0.885	3.49	3.631	2.35	0	0	0	0	0	0		CPI-SC0EAF80261	SEMA7A_a1b1 complex
CPI-SC004A436C5	COL12A1_a1b1 complex	simple:Q99715	complex:a1b1 complex	COL12A1		TRUE	FALSE	FALSE	curated	TRUE	0.266	0.264	0.931	3.536	3.677	2.395	0.347	0.344	1.011	3.617	3.758	2.476	0.352	0.35	1.016	3.622	3.763	2.481	0.263	0.261	0.928	3.533	3.674	2.392	0.229	0.226	0.893	3.498	3.639	2.358	0.454	0.451	1.118	3.723	3.864	2.583		CPI-SC05D87F723	COL6A6_a2b1 complex
CPI-SC08AA91C84	COL17A1_a1b1 complex	simple:Q9UMD9	complex:a1b1 complex	COL17A1		TRUE	FALSE	FALSE	curated	TRUE	0.361	0.358	1.025	3.63	3.771	2.49	0.751	0.748	1.415	4.02	4.161	2.88	0.447	0.444	1.111	3.716	3.858	2.576	0.195	0.192	0.859	3.464	3.605	2.324	0	0	0	0	0	0	0.237	0.234	0.901	3.506	3.647	2.366		CPI-SC01EA4FF6B	COL1A1_a2b1 complex
CPI-SC0EAF80261	SEMA7A_a1b1 complex	simple:O75326	complex:a1b1 complex	SEMA7A		FALSE	FALSE	FALSE	curated	TRUE	0.307	0.304	0.971	3.576	3.717	2.436	0.918	0.915	1.582	4.187	4.328	3.047	0.639	0.637	1.304	3.909	4.05	2.768	0.46	0.457	1.124	3.729	3.87	2.589	0.329	0.326	0.993	3.599	3.74	2.458	0.631	0.628	1.295	3.9	4.041	2.76		CPI-SC054484F7B	COL3A1_a2b1 complex
CPI-SC05D87F723	COL6A6_a2b1 complex	simple:A6NMZ7	complex:a2b1 complex	COL6A6		TRUE	FALSE	FALSE	curated	TRUE	0.168	0.969	0.641	0.139	0.048	0.746	0	0	0	0	0	0	0	0	0	0	0	0	0.168	0.969	0.64	0.138	0.048	0.745	0.171	0.972	0.644	0.142	0.051	0.749	0	0	0	0	0	0		CPI-SC02392F4AF	COL4A1_a2b1 complex
CPI-SC01EA4FF6B	COL1A1_a2b1 complex	simple:P02452	complex:a2b1 complex	COL1A1		TRUE	FALSE	FALSE	curated	TRUE	0.63	1.431	1.102	0.6	0.51	1.207	0.41	1.211	0.883	0.381	0.291	0.988	2.066	2.867	2.538	2.036	1.946	2.643	9.539	10.34	10.011	9.509	9.419	10.116	10.835	11.636	11.307	10.805	10.715	11.412	1.284	2.085	1.757	1.255	1.165	1.862		CPI-SC01FFC9392	FN1_a2b1 complex
CPI-SC054484F7B	COL3A1_a2b1 complex	simple:P02461	complex:a2b1 complex	COL3A1		TRUE	FALSE	FALSE	curated	TRUE	1.505	2.306	1.977	1.475	1.385	2.082	0.805	1.606	1.277	0.775	0.685	1.382	4.096	4.897	4.568	4.066	3.976	4.673	32.961	33.762	33.433	32.931	32.841	33.538	41.001	41.802	41.474	40.972	40.881	41.579	5.633	6.434	6.106	5.603	5.513	6.21		CPI-SC0CA7B34A5	COL5A2_a2b1 complex
CPI-SC02392F4AF	COL4A1_a2b1 complex	simple:P02462	complex:a2b1 complex	COL4A1		TRUE	FALSE	FALSE	curated	TRUE	0.559	1.36	1.031	0.529	0.439	1.136	0.524	1.325	0.996	0.494	0.404	1.101	2.246	3.047	2.719	2.216	2.126	2.824	7.201	8.002	7.674	7.171	7.081	7.778	5.341	6.142	5.814	5.311	5.221	5.918	10.321	11.122	10.793	10.291	10.201	10.898		CPI-SC05CCF815E	COL1A2_a2b1 complex
CPI-SC01FFC9392	FN1_a2b1 complex	simple:P02751	complex:a2b1 complex	FN1		TRUE	FALSE	FALSE	curated	TRUE	0.187	0.988	0.66	0.158	0.068	0.765	0.294	1.095	0.767	0.265	0.175	0.872	0.439	1.24	0.911	0.409	0.319	1.016	1.539	2.34	2.011	1.509	1.419	2.116	2.245	3.046	2.718	2.215	2.125	2.822	0.499	1.3	0.971	0.469	0.379	1.076		CPI-SC07222A428	COL4A2_a2b1 complex
CPI-SC0CA7B34A5	COL5A2_a2b1 complex	simple:P05997	complex:a2b1 complex	COL5A2		TRUE	FALSE	FALSE	curated	TRUE	0.277	1.078	0.749	0.247	0.157	0.854	0.249	1.05	0.722	0.219	0.129	0.827	0.565	1.366	1.037	0.535	0.445	1.142	3.68	4.481	4.152	3.65	3.56	4.257	3.905	4.706	4.377	3.875	3.785	4.482	1.053	1.854	1.526	1.024	0.934	1.631		CPI-SC0FBFA176B	COL11A1_a2b1 complex
CPI-SC05CCF815E	COL1A2_a2b1 complex	simple:P08123	complex:a2b1 complex	COL1A2		TRUE	FALSE	FALSE	curated	TRUE	2.34	3.141	2.812	2.31	2.22	2.917	0.753	1.554	1.226	0.724	0.634	1.331	2.615	3.416	3.088	2.585	2.495	3.192	13.701	14.502	14.173	13.671	13.581	14.278	17.973	18.774	18.445	17.943	17.853	18.55	3.663	4.464	4.136	3.633	3.543	4.241		CPI-SC08D8A859F	COL6A1_a2b1 complex
CPI-SC07222A428	COL4A2_a2b1 complex	simple:P08572	complex:a2b1 complex	COL4A2		TRUE	FALSE	FALSE	curated	TRUE	0.387	1.188	0.86	0.358	0.268	0.965	0.463	1.264	0.935	0.433	0.343	1.04	1.134	1.936	1.607	1.105	1.015	1.712	2.845	3.646	3.317	2.815	2.725	3.422	2.164	2.965	2.637	2.135	2.045	2.742	5.745	6.546	6.218	5.716	5.626	6.323		CPI-SC0814068D9	COL6A2_a2b1 complex
CPI-SC0FBFA176B	COL11A1_a2b1 complex	simple:P12107	complex:a2b1 complex	COL11A1		TRUE	FALSE	FALSE	curated	TRUE	0	0	0	0	0	0	0	0	0	0	0	0	0	0	0	0	0	0	0	0	0	0	0	0	0	0	0	0	0	0	0	0	0	0	0	0		CPI-SC0D870AE49	COL6A3_a2b1 complex
CPI-SC08D8A859F	COL6A1_a2b1 complex	simple:P12109	complex:a2b1 complex	COL6A1		TRUE	FALSE	FALSE	curated	TRUE	0.37	1.171	0.842	0.34	0.25	0.947	0.584	1.385	1.057	0.555	0.465	1.162	0.858	1.659	1.33	0.828	0.738	1.435	1.93	2.731	2.402	1.9	1.81	2.507	1.303	2.104	1.775	1.273	1.183	1.88	1.644	2.445	2.116	1.614	1.524	2.221		CPI-SC0E4E54E13	COL11A2_a2b1 complex
CPI-SC0814068D9	COL6A2_a2b1 complex	simple:P12110	complex:a2b1 complex	COL6A2		TRUE	FALSE	FALSE	curated	TRUE	0.268	1.069	0.74	0.238	0.148	0.845	0.219	1.02	0.692	0.19	0.1	0.797	0.434	1.235	0.906	0.404	0.314	1.011	1.11	1.911	1.583	1.081	0.991	1.688	0.919	1.72	1.392	0.889	0.799	1.497	1.353	2.154	1.826	1.324	1.234	1.931		CPI-SC035134F18	COL5A1_a2b1 complex
CPI-SC0D870AE49	COL6A3_a2b1 complex	simple:P12111	complex:a2b1 complex	COL6A3		TRUE	FALSE	FALSE	curated	TRUE	0.527	1.328	0.999	0.497	0.407	1.104	0.256	1.057	0.728	0.226	0.136	0.833	1.261	2.062	1.734	1.232	1.141	1.839	6.287	7.088	6.76	6.258	6.167	6.865	6.317	7.118	6.789	6.287	6.197	6.894	3.33	4.131	3.802	3.3	3.21	3.907		CPI-SC04B354AE3	COL8A2_a2b1 complex
CPI-SC0E4E54E13	COL11A2_a2b1 complex	simple:P13942	complex:a2b1 complex	COL11A2		TRUE	FALSE	FALSE	curated	TRUE	0.169	0.97	0.641	0.139	0.049	0.746	0.17	0.971	0.642	0.14	0.05	0.747	0	0	0	0	0	0	0.173	0.974	0.646	0.144	0.054	0.751	0	0	0	0	0	0	0	0	0	0	0	0		CPI-SC0FC645961	COL5A3_a2b1 complex
CPI-SC035134F18	COL5A1_a2b1 complex	simple:P20908	complex:a2b1 complex	COL5A1		TRUE	FALSE	FALSE	curated	TRUE	0.423	1.224	0.896	0.394	0.304	1.001	0.442	1.243	0.915	0.413	0.323	1.02	1.238	2.039	1.711	1.209	1.119	1.816	7.244	8.045	7.716	7.214	7.124	7.821	6.006	6.807	6.478	5.976	5.886	6.583	2.616	3.417	3.089	2.587	2.497	3.194		CPI-SC058845C44	COL8A1_a2b1 complex
CPI-SC04B354AE3	COL8A2_a2b1 complex	simple:P25067	complex:a2b1 complex	COL8A2		TRUE	FALSE	FALSE	curated	TRUE	0.17	0.971	0.642	0.14	0.05	0.747	0.172	0.973	0.644	0.142	0.052	0.749	0.178	0.979	0.651	0.149	0.059	0.756	0.167	0.968	0.64	0.138	0.048	0.745	0.172	0.973	0.645	0.143	0.052	0.75	0.19	0.991	0.663	0.161	0.07	0.768		CPI-SC09C0B5D08	COL4A5_a2b1 complex
CPI-SC0FC645961	COL5A3_a2b1 complex	simple:P25940	complex:a2b1 complex	COL5A3		TRUE	FALSE	FALSE	curated	TRUE	0.172	0.973	0.645	0.143	0.053	0.75	0	0	0	0	0	0	0.187	0.988	0.659	0.157	0.067	0.764	0.257	1.058	0.729	0.227	0.137	0.834	0.176	0.977	0.648	0.146	0.056	0.753	0.235	1.036	0.708	0.205	0.115	0.812		CPI-SC039D075C6	COL15A1_a2b1 complex
CPI-SC058845C44	COL8A1_a2b1 complex	simple:P27658	complex:a2b1 complex	COL8A1		TRUE	FALSE	FALSE	curated	TRUE	0.176	0.977	0.649	0.147	0.057	0.754	0	0	0	0	0	0	0.32	1.121	0.792	0.29	0.2	0.897	0.304	1.105	0.776	0.274	0.184	0.881	0.248	1.049	0.72	0.218	0.128	0.825	0.577	1.378	1.05	0.548	0.458	1.155		CPI-SC04B0064C4	COL18A1_a2b1 complex
CPI-SC09C0B5D08	COL4A5_a2b1 complex	simple:P29400	complex:a2b1 complex	COL4A5		TRUE	FALSE	FALSE	curated	TRUE	0.261	1.062	0.733	0.231	0.141	0.838	0.239	1.04	0.711	0.209	0.119	0.816	0.467	1.268	0.94	0.437	0.347	1.044	1.49	2.291	1.963	1.46	1.37	2.068	1.573	2.374	2.046	1.543	1.453	2.15	0.175	0.976	0.648	0.146	0.056	0.753		CPI-SC03DD752AB	COL4A4_a2b1 complex
CPI-SC039D075C6	COL15A1_a2b1 complex	simple:P39059	complex:a2b1 complex	COL15A1		TRUE	FALSE	FALSE	curated	TRUE	0.181	0.982	0.654	0.152	0.062	0.759	0.181	0.982	0.654	0.152	0.061	0.759	0.382	1.183	0.855	0.353	0.262	0.96	0.898	1.699	1.371	0.869	0.779	1.476	1.167	1.968	1.64	1.137	1.047	1.744	0.493	1.294	0.966	0.463	0.373	1.07		CPI-SC052A417CB	COL4A3_a2b1 complex
CPI-SC04B0064C4	COL18A1_a2b1 complex	simple:P39060	complex:a2b1 complex	COL18A1		TRUE	FALSE	FALSE	curated	TRUE	1.56	2.361	2.033	1.53	1.44	2.137	1.06	1.861	1.532	1.03	0.94	1.637	1.662	2.463	2.134	1.632	1.542	2.239	1.959	2.76	2.432	1.929	1.839	2.537	1.714	2.515	2.186	1.684	1.594	2.291	1.541	2.342	2.014	1.512	1.422	2.119		CPI-SC08A98E7D4	COL7A1_a2b1 complex
CPI-SC03DD752AB	COL4A4_a2b1 complex	simple:P53420	complex:a2b1 complex	COL4A4		TRUE	FALSE	FALSE	curated	TRUE	0.187	0.988	0.66	0.158	0.068	0.765	0.231	1.032	0.703	0.201	0.111	0.808	0.231	1.032	0.704	0.202	0.112	0.809	0	0	0	0	0	0	0.17	0.971	0.643	0.141	0.051	0.748	0	0	0	0	0	0		CPI-SC0E0C50FCA	COL14A1_a2b1 complex
CPI-SC052A417CB	COL4A3_a2b1 complex	simple:Q01955	complex:a2b1 complex	COL4A3		TRUE	FALSE	FALSE	curated	TRUE	0.18	0.981	0.653	0.151	0.06	0.758	0.186	0.987	0.658	0.156	0.066	0.763	0.199	1	0.671	0.169	0.079	0.776	0	0	0	0	0	0	0	0	0	0	0	0	0	0	0	0	0	0		CPI-SC01E9FAC20	COL16A1_a2b1 complex
CPI-SC08A98E7D4	COL7A1_a2b1 complex	simple:Q02388	complex:a2b1 complex	COL7A1		TRUE	FALSE	FALSE	curated	TRUE	0.308	1.109	0.78	0.278	0.188	0.885	0.337	1.138	0.81	0.307	0.217	0.915	2.047	2.848	2.52	2.018	1.928	2.625	4.038	4.839	4.51	4.008	3.918	4.615	1.806	2.607	2.278	1.776	1.686	2.383	9.179	9.98	9.651	9.149	9.059	9.756		CPI-SC061137A41	COL4A6_a2b1 complex
CPI-SC0E0C50FCA	COL14A1_a2b1 complex	simple:Q05707	complex:a2b1 complex	COL14A1		TRUE	FALSE	FALSE	curated	TRUE	0.56	1.361	1.033	0.531	0.441	1.138	0.558	1.359	1.03	0.528	0.438	1.135	2.198	2.999	2.671	2.169	2.079	2.776	14.381	15.182	14.854	14.351	14.261	14.958	14.192	14.993	14.665	14.162	14.072	14.77	1.598	2.399	2.07	1.568	1.478	2.175		CPI-SC01F1F24AA	COL9A3_a2b1 complex
CPI-SC01E9FAC20	COL16A1_a2b1 complex	simple:Q07092	complex:a2b1 complex	COL16A1		TRUE	FALSE	FALSE	curated	TRUE	0.218	1.019	0.69	0.188	0.098	0.795	0.3	1.101	0.772	0.27	0.18	0.877	0.299	1.1	0.771	0.269	0.179	0.876	0.182	0.983	0.655	0.153	0.063	0.76	0	0	0	0	0	0	0.303	1.104	0.775	0.273	0.183	0.88		CPI-SC08226CD3B	COL9A2_a2b1 complex
CPI-SC061137A41	COL4A6_a2b1 complex	simple:Q14031	complex:a2b1 complex	COL4A6		TRUE	FALSE	FALSE	curated	TRUE	0.178	0.979	0.65	0.148	0.058	0.755	0.171	0.972	0.643	0.141	0.051	0.748	0.283	1.084	0.755	0.253	0.163	0.86	0.904	1.705	1.376	0.874	0.784	1.481	1.071	1.872	1.543	1.041	0.951	1.648	0.232	1.033	0.705	0.203	0.113	0.81		CPI-SC0EB600CAC	COL24A1_a2b1 complex
CPI-SC01F1F24AA	COL9A3_a2b1 complex	simple:Q14050	complex:a2b1 complex	COL9A3		TRUE	FALSE	FALSE	curated	TRUE	0.177	0.978	0.65	0.147	0.057	0.755	0.172	0.974	0.645	0.143	0.053	0.75	0	0	0	0	0	0	0.169	0.971	0.642	0.14	0.05	0.747	0.17	0.971	0.643	0.141	0.051	0.748	0	0	0	0	0	0		CPI-SC083EDDA21	COL28A1_a2b1 complex
CPI-SC08226CD3B	COL9A2_a2b1 complex	simple:Q14055	complex:a2b1 complex	COL9A2		TRUE	FALSE	FALSE	curated	TRUE	0.224	1.025	0.697	0.195	0.105	0.802	0.197	0.998	0.67	0.168	0.078	0.775	0.251	1.052	0.723	0.221	0.131	0.828	0.172	0.973	0.644	0.142	0.052	0.749	0	0	0	0	0	0	0	0	0	0	0	0		CPI-SC0CCF30377	COL13A1_a2b1 complex
CPI-SC0EB600CAC	COL24A1_a2b1 complex	simple:Q17RW2	complex:a2b1 complex	COL24A1		TRUE	FALSE	FALSE	curated	TRUE	0.196	0.997	0.668	0.166	0.076	0.773	0.19	0.991	0.662	0.16	0.07	0.767	0.34	1.141	0.812	0.31	0.22	0.917	0.752	1.553	1.224	0.722	0.632	1.329	0.909	1.71	1.381	0.879	0.789	1.486	0.447	1.248	0.919	0.417	0.327	1.024		CPI-SC0CE6F5084	COL27A1_a2b1 complex
CPI-SC083EDDA21	COL28A1_a2b1 complex	simple:Q2UY09	complex:a2b1 complex	COL28A1		TRUE	FALSE	FALSE	curated	TRUE	0.192	0.993	0.665	0.162	0.072	0.769	0.173	0.974	0.646	0.143	0.053	0.75	0.204	1.005	0.677	0.175	0.084	0.782	0.182	0.983	0.655	0.153	0.063	0.76	0.173	0.974	0.645	0.143	0.053	0.75	0.185	0.986	0.658	0.155	0.065	0.763		CPI-SC09DE07794	COL22A1_a2b1 complex
CPI-SC0CCF30377	COL13A1_a2b1 complex	simple:Q5TAT6	complex:a2b1 complex	COL13A1		FALSE	FALSE	FALSE	curated	TRUE	0.168	0.969	0.641	0.138	0.048	0.745	0.17	0.971	0.642	0.14	0.05	0.747	0.176	0.977	0.648	0.146	0.056	0.753	0.207	1.008	0.68	0.178	0.088	0.785	0.173	0.974	0.645	0.143	0.053	0.75	0.316	1.117	0.788	0.286	0.196	0.893		CPI-SC0AD6D8724	COL26A1_a2b1 complex
CPI-SC0CE6F5084	COL27A1_a2b1 complex	simple:Q8IZC6	complex:a2b1 complex	COL27A1		TRUE	FALSE	FALSE	curated	TRUE	0.457	1.258	0.929	0.427	0.337	1.034	0.329	1.13	0.802	0.3	0.209	0.907	0.916	1.717	1.389	0.887	0.797	1.494	0.624	1.425	1.096	0.594	0.504	1.201	0.55	1.351	1.022	0.52	0.43	1.127	0.699	1.501	1.172	0.67	0.58	1.277		CPI-SC040C26CBD	COL21A1_a2b1 complex
CPI-SC09DE07794	COL22A1_a2b1 complex	simple:Q8NFW1	complex:a2b1 complex	COL22A1		TRUE	FALSE	FALSE	curated	TRUE	0.177	0.978	0.65	0.148	0.058	0.755	0.171	0.972	0.643	0.141	0.051	0.748	0	0	0	0	0	0	0	0	0	0	0	0	0	0	0	0	0	0	0.329	1.13	0.802	0.3	0.21	0.907		CPI-SC0F300DE24	COL12A1_a2b1 complex
CPI-SC0AD6D8724	COL26A1_a2b1 complex	simple:Q96A83	complex:a2b1 complex	COL26A1		TRUE	FALSE	FALSE	curated	TRUE	0	0	0	0	0	0	0	0	0	0	0	0	0.172	0.973	0.645	0.143	0.053	0.75	0.182	0.983	0.655	0.153	0.063	0.76	0.193	0.994	0.665	0.163	0.073	0.77	0	0	0	0	0	0		CPI-SC06873D10F	COL17A1_a2b1 complex
CPI-SC040C26CBD	COL21A1_a2b1 complex	simple:Q96P44	complex:a2b1 complex	COL21A1		TRUE	FALSE	FALSE	curated	TRUE	0.168	0.969	0.641	0.139	0.049	0.746	0	0	0	0	0	0	0.177	0.978	0.65	0.147	0.057	0.755	0.186	0.987	0.658	0.156	0.066	0.763	0.197	0.998	0.67	0.168	0.078	0.775	0	0	0	0	0	0		CPI-SC0E3784FFB	LAMC1_a2b1 complex
CPI-SC0F300DE24	COL12A1_a2b1 complex	simple:Q99715	complex:a2b1 complex	COL12A1		TRUE	FALSE	FALSE	curated	TRUE	0.243	1.044	0.715	0.213	0.123	0.82	0.324	1.125	0.796	0.294	0.204	0.901	0.329	1.13	0.801	0.299	0.209	0.906	0.24	1.041	0.713	0.21	0.12	0.817	0.206	1.007	0.678	0.176	0.086	0.783	0.43	1.231	0.903	0.401	0.311	1.008		CPI-SC0D9B795CC	CDH1_a2b1 complex
CPI-SC06873D10F	COL17A1_a2b1 complex	simple:Q9UMD9	complex:a2b1 complex	COL17A1		TRUE	FALSE	FALSE	curated	TRUE	0.338	1.139	0.81	0.308	0.218	0.915	0.727	1.528	1.2	0.698	0.608	1.305	0.424	1.225	0.896	0.394	0.304	1.001	0.171	0.972	0.644	0.142	0.051	0.749	0	0	0	0	0	0	0.213	1.014	0.686	0.184	0.094	0.791		CPI-SC08B6B74FB	FN1_a2Bb3 complex
CPI-SC0E3784FFB	LAMC1_a2b1 complex	simple:P11047	complex:a2b1 complex	LAMC1		TRUE	FALSE	FALSE	curated	TRUE	1.431	2.232	1.903	1.401	1.311	2.008	1.062	1.863	1.535	1.032	0.942	1.639	1.357	2.158	1.829	1.327	1.237	1.934	3.239	4.04	3.712	3.21	3.119	3.817	3.387	4.189	3.86	3.358	3.268	3.965	1.237	2.038	1.709	1.207	1.117	1.814		CPI-SC08067D831	VTN_a2Bb3 complex
CPI-SC0D9B795CC	CDH1_a2b1 complex	simple:P12830	complex:a2b1 complex	CDH1		FALSE	FALSE	FALSE	curated	TRUE	1.636	2.437	2.108	1.606	1.516	2.213	2.066	2.867	2.539	2.036	1.946	2.644	1.251	2.052	1.724	1.222	1.131	1.829	0.28	1.081	0.753	0.251	0.161	0.858	0.244	1.045	0.717	0.215	0.125	0.822	0.385	1.186	0.858	0.355	0.265	0.962		CPI-SC0200AC9E3	THBS1_a2Bb3 complex
CPI-SC08B6B74FB	FN1_a2Bb3 complex	simple:P02751	complex:a2Bb3 complex	FN1		TRUE	FALSE	FALSE	curated	TRUE	0	0.025	0.055	0	0	0.033	0	0.132	0.162	0	0	0.14	0	0.277	0.307	0	0	0.284	0	1.377	1.406	0	0	1.384	0	2.083	2.113	0	0	2.09	0	0.337	0.366	0	0	0.344		CPI-SC090855C8E	FN1_aVb3 complex
CPI-SC08067D831	VTN_a2Bb3 complex	simple:P04004	complex:a2Bb3 complex	VTN		TRUE	FALSE	FALSE	curated	TRUE	0	0	0	0	0	0	0	0	0	0	0	0	0	0	0	0	0	0	0	0.007	0.037	0	0	0.014	0	0	0	0	0	0	0	0	0	0	0	0		CPI-SC0B9199C7F	LAMC1_aVb3 complex
CPI-SC0200AC9E3	THBS1_a2Bb3 complex	simple:P07996	complex:a2Bb3 complex	THBS1		FALSE	FALSE	FALSE	curated	TRUE	0	0.029	0.059	0	0	0.037	0	0.044	0.074	0	0	0.052	0	0.079	0.109	0	0	0.086	0	0.142	0.171	0	0	0.149	0	0.078	0.108	0	0	0.086	0	0.416	0.445	0	0	0.423		CPI-SC0530C27A8	VTN_aVb3 complex
CPI-SC090855C8E	FN1_aVb3 complex	simple:P02751	complex:aVb3 complex	FN1		TRUE	FALSE	FALSE	curated	TRUE	0.031	0.05	0.218	0.081	0.038	0.457	0.138	0.157	0.325	0.188	0.145	0.564	0.282	0.302	0.469	0.332	0.29	0.709	1.382	1.402	1.569	1.432	1.389	1.809	2.088	2.108	2.275	2.138	2.096	2.515	0.342	0.361	0.529	0.392	0.349	0.768		CPI-SC0755598EE	THBS1_aVb3 complex
CPI-SC0B9199C7F	LAMC1_aVb3 complex	simple:P11047	complex:aVb3 complex	LAMC1		TRUE	FALSE	FALSE	curated	TRUE	1.274	1.294	1.461	1.324	1.281	1.701	0.905	0.925	1.092	0.955	0.913	1.332	1.2	1.22	1.387	1.25	1.207	1.627	3.083	3.102	3.27	3.133	3.09	3.509	3.231	3.25	3.418	3.281	3.238	3.657	1.08	1.1	1.267	1.13	1.088	1.507		CPI-SC044E3F9B6	FGF2_aVb3 complex
CPI-SC0530C27A8	VTN_aVb3 complex	simple:P04004	complex:aVb3 complex	VTN		TRUE	FALSE	FALSE	curated	TRUE	0	0	0	0	0	0	0	0	0	0	0	0	0	0	0	0	0	0	0.012	0.032	0.199	0.062	0.02	0.439	0	0	0	0	0	0	0	0	0	0	0	0		CPI-SC0988E0218	SPP1_aVb3 complex
CPI-SC0755598EE	THBS1_aVb3 complex	simple:P07996	complex:aVb3 complex	THBS1		FALSE	FALSE	FALSE	curated	TRUE	0.035	0.054	0.222	0.085	0.042	0.461	0.05	0.069	0.237	0.1	0.057	0.476	0.084	0.104	0.272	0.135	0.092	0.511	0.147	0.167	0.334	0.197	0.155	0.574	0.084	0.103	0.271	0.134	0.091	0.51	0.421	0.44	0.608	0.471	0.428	0.847		CPI-SC0E2D0DC4B	FGF1_aVb3 complex
CPI-SC044E3F9B6	FGF2_aVb3 complex	simple:P09038	complex:aVb3 complex	FGF2		TRUE	FALSE	FALSE	curated	TRUE	0.032	0.052	0.219	0.082	0.04	0.459	0.066	0.086	0.254	0.116	0.074	0.493	0.341	0.36	0.528	0.391	0.348	0.767	0.894	0.914	1.081	0.944	0.901	1.321	0.337	0.357	0.524	0.387	0.345	0.764	2.277	2.297	2.464	2.327	2.284	2.704		CPI-SC00756BB93	THY1_aVb3 complex
CPI-SC0988E0218	SPP1_aVb3 complex	simple:P10451	complex:aVb3 complex	SPP1		TRUE	FALSE	FALSE	curated	TRUE	2.515	2.534	2.702	2.565	2.522	2.941	0.932	0.952	1.119	0.982	0.94	1.359	0.482	0.501	0.669	0.532	0.489	0.908	0.317	0.337	0.504	0.367	0.325	0.744	0.198	0.218	0.385	0.248	0.205	0.625	0.102	0.122	0.289	0.152	0.11	0.529		CPI-SC02E74AFA5	MMP2_aVb3 complex
CPI-SC0E2D0DC4B	FGF1_aVb3 complex	simple:P05230	complex:aVb3 complex	FGF1		TRUE	FALSE	FALSE	curated	TRUE	0	0	0	0	0	0	0	0	0	0	0	0	0	0	0	0	0	0	0	0	0	0	0	0	0	0	0	0	0	0	0	0	0	0	0	0		CPI-SC0A58E6695	TNC_aVb3 complex
CPI-SC00756BB93	THY1_aVb3 complex	simple:P04216	complex:aVb3 complex	THY1		FALSE	FALSE	FALSE	curated	TRUE	0.068	0.088	0.255	0.118	0.076	0.495	0.091	0.11	0.278	0.141	0.098	0.517	0.461	0.481	0.648	0.511	0.468	0.888	1.704	1.723	1.891	1.754	1.711	2.13	1.968	1.988	2.156	2.018	1.976	2.395	1.068	1.087	1.255	1.118	1.075	1.494		CPI-SC06525B099	L1CAM_aVb3 complex
CPI-SC02E74AFA5	MMP2_aVb3 complex	simple:P08253	complex:aVb3 complex	MMP2		TRUE	FALSE	FALSE	curated	TRUE	0.091	0.111	0.278	0.141	0.098	0.518	0.056	0.076	0.244	0.107	0.064	0.483	0.49	0.51	0.677	0.54	0.497	0.917	1.637	1.656	1.824	1.687	1.644	2.063	1.118	1.138	1.305	1.168	1.126	1.545	3.257	3.277	3.444	3.307	3.264	3.684		CPI-SC095A2C115	PLAUR_aVb3 complex
CPI-SC0A58E6695	TNC_aVb3 complex	simple:P24821	complex:aVb3 complex	TNC		TRUE	FALSE	FALSE	curated	TRUE	0.045	0.065	0.233	0.095	0.053	0.472	0.261	0.281	0.448	0.311	0.268	0.688	0.506	0.525	0.693	0.556	0.513	0.932	0.307	0.327	0.494	0.357	0.314	0.734	0.067	0.087	0.254	0.117	0.074	0.494	2.488	2.507	2.675	2.538	2.495	2.914		CPI-SC0EFCE145F	OMD_aVb3 complex
CPI-SC06525B099	L1CAM_aVb3 complex	simple:P32004	complex:aVb3 complex	L1CAM		FALSE	FALSE	FALSE	curated	TRUE	0.012	0.032	0.199	0.062	0.019	0.439	0.062	0.082	0.249	0.112	0.069	0.489	0.114	0.133	0.301	0.164	0.121	0.54	0.023	0.042	0.21	0.073	0.03	0.449	0	0	0	0	0	0	0.046	0.066	0.233	0.096	0.053	0.473		CPI-SC04F2478E9	FN1_a3b1 complex
CPI-SC095A2C115	PLAUR_aVb3 complex	simple:Q03405	complex:aVb3 complex	PLAUR		TRUE	TRUE	FALSE	curated	TRUE	0.364	0.383	0.551	0.414	0.371	0.79	1.862	1.881	2.049	1.912	1.869	2.288	0.995	1.015	1.182	1.045	1.002	1.422	0.881	0.901	1.068	0.931	0.888	1.308	0.96	0.98	1.147	1.01	0.967	1.387	2.044	2.064	2.231	2.094	2.051	2.471		CPI-SC02BFEEC8A	THBS1_a3b1 complex
CPI-SC0EFCE145F	OMD_aVb3 complex	simple:Q99983	complex:aVb3 complex	OMD		TRUE	FALSE	FALSE	curated	TRUE	0	0	0	0	0	0	0	0	0	0	0	0	0	0	0	0	0	0	0	0	0	0	0	0	0	0	0	0	0	0	0	0	0	0	0	0		CPI-SC0ED0520DD	LAMA3_a3b1 complex
CPI-SC04F2478E9	FN1_a3b1 complex	simple:P02751	complex:a3b1 complex	FN1		TRUE	FALSE	FALSE	curated	TRUE	0.247	0.545	0.44	0.161	0.21	0.171	0.354	0.652	0.547	0.268	0.317	0.278	0.498	0.796	0.692	0.412	0.461	0.422	1.598	1.896	1.792	1.512	1.561	1.522	2.304	2.602	2.498	2.218	2.267	2.228	0.558	0.856	0.752	0.472	0.521	0.482		CPI-SC09938698A	CSPG4_a3b1 complex
CPI-SC02BFEEC8A	THBS1_a3b1 complex	simple:P07996	complex:a3b1 complex	THBS1		FALSE	FALSE	FALSE	curated	TRUE	0.251	0.548	0.444	0.165	0.213	0.174	0.266	0.564	0.459	0.18	0.229	0.19	0.3	0.598	0.494	0.214	0.263	0.224	0.363	0.661	0.557	0.277	0.326	0.287	0.3	0.597	0.493	0.214	0.262	0.223	0.637	0.935	0.83	0.551	0.6	0.561		CPI-SC06364D669	FN1_a4b1 complex
CPI-SC0ED0520DD	LAMA3_a3b1 complex	simple:Q16787	complex:a3b1 complex	LAMA3		TRUE	FALSE	FALSE	curated	TRUE	0.94	1.237	1.133	0.854	0.902	0.863	2.622	2.919	2.815	2.536	2.585	2.546	1.267	1.564	1.46	1.181	1.23	1.191	0.301	0.599	0.494	0.215	0.264	0.225	0.261	0.559	0.454	0.175	0.224	0.185	0.334	0.632	0.528	0.248	0.297	0.258		CPI-SC07BE7830D	SPP1_a4b1 complex
CPI-SC09938698A	CSPG4_a3b1 complex	simple:Q6UVK1	complex:a3b1 complex	CSPG4		FALSE	FALSE	FALSE	curated	TRUE	0.24	0.538	0.433	0.154	0.203	0.164	0.229	0.527	0.423	0.143	0.192	0.153	0.248	0.546	0.442	0.162	0.211	0.172	0.284	0.581	0.477	0.198	0.247	0.208	0.248	0.546	0.442	0.162	0.211	0.172	0.439	0.737	0.633	0.353	0.402	0.363		CPI-SC0BC542ACC	TNC_a4b1 complex
CPI-SC06364D669	FN1_a4b1 complex	simple:P02751	complex:a4b1 complex	FN1		TRUE	FALSE	FALSE	curated	TRUE	0.1	0.029	0.096	0.12	0.056	0.032	0.207	0.136	0.202	0.227	0.163	0.138	0.352	0.281	0.347	0.371	0.307	0.283	1.451	1.381	1.447	1.471	1.407	1.383	2.158	2.087	2.153	2.177	2.113	2.089	0.411	0.34	0.407	0.431	0.367	0.343		CPI-SC0E9C058EB	PLAUR_a4b1 complex
CPI-SC07BE7830D	SPP1_a4b1 complex	simple:P10451	complex:a4b1 complex	SPP1		TRUE	FALSE	FALSE	curated	TRUE	2.584	2.513	2.579	2.604	2.54	2.515	1.002	0.931	0.997	1.021	0.957	0.933	0.551	0.48	0.546	0.571	0.507	0.483	0.387	0.316	0.382	0.406	0.342	0.318	0.268	0.197	0.263	0.287	0.223	0.199	0.172	0.101	0.167	0.191	0.127	0.103		CPI-SC0A9EB628A	VCAM1_a4b1 complex
CPI-SC0BC542ACC	TNC_a4b1 complex	simple:P24821	complex:a4b1 complex	TNC		TRUE	FALSE	FALSE	curated	TRUE	0.115	0.044	0.11	0.134	0.07	0.046	0.331	0.26	0.326	0.35	0.286	0.262	0.575	0.504	0.57	0.595	0.531	0.507	0.377	0.306	0.372	0.396	0.332	0.308	0.137	0.066	0.132	0.156	0.092	0.068	2.557	2.486	2.552	2.576	2.512	2.488		CPI-SC070D5A96F	JAM2_a4b1 complex
CPI-SC0E9C058EB	PLAUR_a4b1 complex	simple:Q03405	complex:a4b1 complex	PLAUR		TRUE	TRUE	FALSE	curated	TRUE	0.433	0.362	0.428	0.452	0.389	0.364	1.931	1.86	1.926	1.951	1.887	1.862	1.064	0.993	1.06	1.084	1.02	0.996	0.95	0.879	0.946	0.97	0.906	0.882	1.029	0.958	1.025	1.049	0.985	0.961	2.113	2.042	2.109	2.133	2.069	2.045		CPI-SC0B4D7E0FF	FN1_a4b7 complex
CPI-SC0A9EB628A	VCAM1_a4b1 complex	simple:P19320	complex:a4b1 complex	VCAM1		FALSE	FALSE	FALSE	curated	TRUE	0	0	0	0	0	0	0	0	0	0	0	0	0	0	0	0	0	0	0	0	0	0	0	0	0	0	0	0	0	0	0	0	0	0	0	0		CPI-SC08E97F7CA	VCAM1_a4b7 complex
CPI-SC070D5A96F	JAM2_a4b1 complex	simple:P57087	complex:a4b1 complex	JAM2		FALSE	FALSE	FALSE	curated	TRUE	0.084	0.013	0.08	0.104	0.04	0.016	0	0	0	0	0	0	0.109	0.038	0.105	0.129	0.065	0.041	0.171	0.1	0.167	0.191	0.127	0.103	0	0	0	0	0	0	0.521	0.45	0.516	0.54	0.476	0.452		CPI-SC098B43B5A	MADCAM1_a4b7 complex
CPI-SC0B4D7E0FF	FN1_a4b7 complex	simple:P02751	complex:a4b7 complex	FN1		TRUE	FALSE	FALSE	curated	TRUE	0.037	0.034	0	0.025	0	0	0.144	0.141	0	0.131	0	0	0.288	0.285	0	0.276	0	0	1.388	1.385	0	1.376	0	0	2.095	2.092	0	2.082	0	0	0.348	0.345	0	0.336	0	0		CPI-SC08B2AD7C6	FN1_a5b1 complex
CPI-SC08E97F7CA	VCAM1_a4b7 complex	simple:P19320	complex:a4b7 complex	VCAM1		FALSE	FALSE	FALSE	curated	TRUE	0	0	0	0	0	0	0	0	0	0	0	0	0	0	0	0	0	0	0	0	0	0	0	0	0	0	0	0	0	0	0	0	0	0	0	0		CPI-SC0592EC3D0	L1CAM_a5b1 complex
CPI-SC098B43B5A	MADCAM1_a4b7 complex	simple:Q13477	complex:a4b7 complex	MADCAM1		FALSE	FALSE	FALSE	curated	TRUE	0	0	0	0	0	0	0	0	0	0	0	0	0	0	0	0	0	0	0	0	0	0	0	0	0	0	0	0	0	0	0	0	0	0	0	0		CPI-SC058F72F90	FBN1_a5b1 complex
CPI-SC08B2AD7C6	FN1_a5b1 complex	simple:P02751	complex:a5b1 complex	FN1		TRUE	FALSE	FALSE	curated	TRUE	0.034	0.038	0.105	0.253	0.285	0.25	0.141	0.145	0.211	0.36	0.392	0.357	0.285	0.289	0.356	0.504	0.536	0.501	1.385	1.389	1.456	1.604	1.636	1.601	2.091	2.095	2.162	2.31	2.342	2.307	0.345	0.349	0.416	0.564	0.596	0.561		CPI-SC096929DB0	FN1_aVb1 complex
CPI-SC0592EC3D0	L1CAM_a5b1 complex	simple:P32004	complex:a5b1 complex	L1CAM		FALSE	FALSE	FALSE	curated	TRUE	0.015	0.019	0.086	0.234	0.266	0.231	0.065	0.069	0.136	0.284	0.316	0.281	0.117	0.121	0.187	0.336	0.368	0.333	0.026	0.03	0.096	0.245	0.277	0.242	0	0	0	0	0	0	0.049	0.053	0.12	0.268	0.3	0.265		CPI-SC067AD890A	VTN_aVb1 complex
CPI-SC058F72F90	FBN1_a5b1 complex	simple:P35555	complex:a5b1 complex	FBN1		TRUE	FALSE	FALSE	curated	TRUE	0.078	0.082	0.149	0.297	0.329	0.294	0.046	0.05	0.116	0.264	0.297	0.261	0.389	0.393	0.46	0.608	0.64	0.605	2.189	2.193	2.26	2.408	2.44	2.405	2.697	2.701	2.768	2.916	2.948	2.913	0.394	0.398	0.465	0.613	0.645	0.61		CPI-SC0847A64D2	FN1_aVb5 complex
CPI-SC096929DB0	FN1_aVb1 complex	simple:P02751	complex:aVb1 complex	FN1		TRUE	FALSE	FALSE	curated	TRUE	0.355	0.843	0.47	0.693	0.72	0.585	0.462	0.95	0.577	0.8	0.827	0.692	0.607	1.094	0.722	0.944	0.971	0.837	1.706	2.194	1.821	2.044	2.071	1.936	2.413	2.901	2.528	2.75	2.777	2.643	0.666	1.154	0.781	1.004	1.031	0.896		CPI-SC0EEF3A379	LAMC1_a6b1 complex
CPI-SC067AD890A	VTN_aVb1 complex	simple:P04004	complex:aVb1 complex	VTN		TRUE	FALSE	FALSE	curated	TRUE	0	0	0	0	0	0	0	0	0	0	0	0	0	0	0	0	0	0	0.337	0.825	0.452	0.674	0.701	0.567	0	0	0	0	0	0	0	0	0	0	0	0		CPI-SC0A2FE9693	LAMC1_a7b1 complex
CPI-SC0847A64D2	FN1_aVb5 complex	simple:P02751	complex:aVb5 complex	FN1		TRUE	FALSE	FALSE	curated	TRUE	0.187	0.16	0.165	0.61	0.832	0.233	0.293	0.267	0.272	0.716	0.938	0.34	0.438	0.412	0.417	0.861	1.083	0.484	1.538	1.512	1.516	1.961	2.183	1.584	2.244	2.218	2.223	2.667	2.889	2.291	0.498	0.471	0.476	0.921	1.143	0.544		CPI-SC007890A1C	CDH1_aEb7 complex
CPI-SC0EEF3A379	LAMC1_a6b1 complex	simple:P11047	complex:a6b1 complex	LAMC1		TRUE	FALSE	FALSE	curated	TRUE	2.44	2.656	1.916	1.392	1.322	1.295	2.071	2.288	1.548	1.023	0.953	0.926	2.365	2.582	1.842	1.318	1.248	1.221	4.248	4.465	3.725	3.201	3.13	3.104	4.396	4.613	3.873	3.349	3.279	3.252	2.246	2.463	1.722	1.198	1.128	1.101		CPI-SC04AED00CE	TNC_aVb6 complex
CPI-SC0A2FE9693	LAMC1_a7b1 complex	simple:P11047	complex:a7b1 complex	LAMC1		TRUE	FALSE	FALSE	curated	TRUE	1.268	0	0	0	0	0	0.899	0	0	0	0	0	1.194	0	0	0	0	0	3.077	0	0	0	0	0	3.225	0	0	0	0	0	1.074	0	0	0	0	0		CPI-SC0E60FEE99	TGFB1_aVb6 complex
CPI-SC007890A1C	CDH1_aEb7 complex	simple:P12830	complex:aEb7 complex	CDH1		FALSE	FALSE	FALSE	curated	TRUE	1.485	1.482	0	1.473	0	0	1.916	1.913	0	1.903	0	0	1.101	1.098	0	1.088	0	0	0.13	0.127	0	0.118	0	0	0.094	0.091	0	0.081	0	0	0.235	0.232	0	0.222	0	0		CPI-CS08CC8F9D3	ACVR1_BMPR2_BMP7
CPI-SC04AED00CE	TNC_aVb6 complex	simple:P24821	complex:aVb6 complex	TNC		TRUE	FALSE	FALSE	curated	TRUE	0.209	0.667	0.4	0.047	0.041	0	0.425	0.883	0.616	0.263	0.257	0	0.669	1.128	0.861	0.507	0.502	0	0.471	0.929	0.662	0.309	0.303	0	0.23	0.689	0.422	0.068	0.063	0	2.651	3.109	2.842	2.489	2.483	0		CPI-CS046B3C139	ACVR_1A2A receptor_BMP7
CPI-SC0E60FEE99	TGFB1_aVb6 complex	simple:P01137	complex:aVb6 complex	TGFB1		TRUE	FALSE	FALSE	curated	TRUE	0.199	0.657	0.39	0.037	0.031	0	0.195	0.653	0.386	0.032	0.027	0	0.227	0.685	0.418	0.065	0.059	0	0.311	0.77	0.503	0.149	0.144	0	0.22	0.679	0.412	0.058	0.053	0	0.191	0.65	0.383	0.029	0.024	0		CPI-CS0288D901D	ACVR_1A2B receptor_BMP7
CPI-CS08CC8F9D3	ACVR1_BMPR2_BMP7	complex:ACVR1_BMPR2	simple:P18075		BMP7	TRUE	TRUE	FALSE	curated	FALSE	0.024	0.052	0.045	0	0	0.047	0.022	0.051	0.043	0	0	0.046	0.089	0.117	0.11	0	0	0.112	0.054	0.082	0.075	0	0	0.077	0.075	0.104	0.096	0	0	0.099	0.105	0.134	0.127	0	0	0.129		CPI-CS05EAF93CC	BMPR1A_BMPR2_BMP7
CPI-CS046B3C139	ACVR_1A2A receptor_BMP7	complex:ACVR_1A2A receptor	simple:P18075		BMP7	TRUE	TRUE	FALSE	curated	FALSE	0.024	0.052	0.045	0	0	0.047	0.022	0.051	0.043	0	0	0.046	0.089	0.117	0.11	0	0	0.112	0.054	0.082	0.075	0	0	0.077	0.075	0.104	0.096	0	0	0.099	0.105	0.134	0.127	0	0	0.129		CPI-CS08109C435	BMPR1B_BMPR2_BMP7
CPI-CS0288D901D	ACVR_1A2B receptor_BMP7	complex:ACVR_1A2B receptor	simple:P18075		BMP7	TRUE	TRUE	FALSE	curated	FALSE	0.023	0.052	0.044	0	0	0.046	0.024	0.053	0.045	0	0	0.048	0.032	0.061	0.053	0	0	0.056	0.05	0.079	0.071	0	0	0.073	0.078	0.106	0.099	0	0	0.101	0.022	0.051	0.043	0	0	0.045		CPI-CS0D35E69F6	BMR1A_ACR2A_BMP7
CPI-CS05EAF93CC	BMPR1A_BMPR2_BMP7	complex:BMPR1A_BMPR2	simple:P18075		BMP7	TRUE	TRUE	FALSE	curated	FALSE	0.073	0.101	0.094	0	0	0.096	0.037	0.066	0.059	0	0	0.061	0.057	0.086	0.079	0	0	0.081	0.043	0.071	0.064	0	0	0.066	0.072	0.101	0.093	0	0	0.095	0.109	0.138	0.13	0	0	0.132		CPI-CS0C99F8D96	BMR1A_AVR2B_BMP7
CPI-CS08109C435	BMPR1B_BMPR2_BMP7	complex:BMPR1B_BMPR2	simple:P18075		BMP7	TRUE	TRUE	FALSE	curated	FALSE	0.036	0.064	0.057	0	0	0.059	0.016	0.045	0.037	0	0	0.04	0.021	0.05	0.042	0	0	0.045	0.004	0.033	0.025	0	0	0.027	0	0	0	0	0	0	0	0	0	0	0	0		CPI-CS0DF85303A	BMR1B_AVR2A_BMP7
CPI-CS0D35E69F6	BMR1A_ACR2A_BMP7	complex:BMR1A_ACR2A	simple:P18075		BMP7	TRUE	TRUE	FALSE	curated	FALSE	0.073	0.101	0.094	0	0	0.096	0.037	0.066	0.059	0	0	0.061	0.057	0.086	0.079	0	0	0.081	0.043	0.071	0.064	0	0	0.066	0.072	0.101	0.093	0	0	0.095	0.109	0.138	0.13	0	0	0.132		CPI-CS0C16967C6	ACVR1_BMPR2_BMP6
CPI-CS0C99F8D96	BMR1A_AVR2B_BMP7	complex:BMR1A_AVR2B	simple:P18075		BMP7	TRUE	TRUE	FALSE	curated	FALSE	0.023	0.052	0.044	0	0	0.046	0.024	0.053	0.045	0	0	0.048	0.032	0.061	0.053	0	0	0.056	0.05	0.079	0.071	0	0	0.073	0.078	0.106	0.099	0	0	0.101	0.022	0.051	0.043	0	0	0.045		CPI-CS0FFBA02F8	ACVR_1A2A receptor_BMP6
CPI-CS0DF85303A	BMR1B_AVR2A_BMP7	complex:BMR1B_AVR2A	simple:P18075		BMP7	TRUE	TRUE	FALSE	curated	FALSE	0.036	0.064	0.057	0	0	0.059	0.016	0.045	0.037	0	0	0.04	0.021	0.05	0.042	0	0	0.045	0.004	0.033	0.025	0	0	0.027	0	0	0	0	0	0	0	0	0	0	0	0		CPI-CS02AEFFE28	ACVR_1A2B receptor_BMP6
CPI-CS0C16967C6	ACVR1_BMPR2_BMP6	complex:ACVR1_BMPR2	simple:P22004		BMP6	TRUE	TRUE	FALSE	curated	FALSE	0.029	0	0.051	0.029	0	0.184	0.028	0	0.049	0.028	0	0.183	0.094	0	0.116	0.094	0	0.249	0.059	0	0.081	0.059	0	0.214	0.081	0	0.102	0.081	0	0.236	0.111	0	0.132	0.111	0	0.266		CPI-CS0F6CFB979	BMPR1A_BMPR2_BMP6
CPI-CS0FFBA02F8	ACVR_1A2A receptor_BMP6	complex:ACVR_1A2A receptor	simple:P22004		BMP6	TRUE	TRUE	FALSE	curated	FALSE	0.029	0	0.051	0.029	0	0.184	0.028	0	0.049	0.028	0	0.183	0.094	0	0.116	0.094	0	0.249	0.059	0	0.081	0.059	0	0.214	0.081	0	0.102	0.081	0	0.236	0.111	0	0.132	0.111	0	0.266		CPI-CS0EF793D6A	BMPR1B_BMPR2_BMP6
CPI-CS02AEFFE28	ACVR_1A2B receptor_BMP6	complex:ACVR_1A2B receptor	simple:P22004		BMP6	TRUE	TRUE	FALSE	curated	FALSE	0.028	0	0.05	0.028	0	0.184	0.03	0	0.051	0.03	0	0.185	0.038	0	0.059	0.038	0	0.193	0.055	0	0.077	0.055	0	0.211	0.083	0	0.105	0.083	0	0.238	0.028	0	0.049	0.027	0	0.183		CPI-CS0247DA882	BMR1A_ACR2A_BMP6
CPI-CS0F6CFB979	BMPR1A_BMPR2_BMP6	complex:BMPR1A_BMPR2	simple:P22004		BMP6	TRUE	TRUE	FALSE	curated	FALSE	0.078	0	0.1	0.078	0	0.233	0.043	0	0.064	0.043	0	0.198	0.063	0	0.084	0.063	0	0.218	0.048	0	0.07	0.048	0	0.203	0.078	0	0.099	0.077	0	0.233	0.115	0	0.136	0.115	0	0.27		CPI-CS076E1A639	BMR1A_AVR2B_BMP6
CPI-CS0EF793D6A	BMPR1B_BMPR2_BMP6	complex:BMPR1B_BMPR2	simple:P22004		BMP6	TRUE	TRUE	FALSE	curated	FALSE	0.041	0	0.063	0.041	0	0.196	0.022	0	0.043	0.022	0	0.177	0.027	0	0.048	0.027	0	0.182	0.01	0	0.031	0.009	0	0.165	0	0	0	0	0	0	0	0	0	0	0	0		CPI-CS0921BB754	BMR1B_AVR2A_BMP6
CPI-CS0247DA882	BMR1A_ACR2A_BMP6	complex:BMR1A_ACR2A	simple:P22004		BMP6	TRUE	TRUE	FALSE	curated	FALSE	0.078	0	0.1	0.078	0	0.233	0.043	0	0.064	0.043	0	0.198	0.063	0	0.084	0.063	0	0.218	0.048	0	0.07	0.048	0	0.203	0.078	0	0.099	0.077	0	0.233	0.115	0	0.136	0.115	0	0.27		CPI-CS0AEE2FB22	ACVR1_BMPR2_BMP8A
CPI-CS076E1A639	BMR1A_AVR2B_BMP6	complex:BMR1A_AVR2B	simple:P22004		BMP6	TRUE	TRUE	FALSE	curated	FALSE	0.028	0	0.05	0.028	0	0.184	0.03	0	0.051	0.03	0	0.185	0.038	0	0.059	0.038	0	0.193	0.055	0	0.077	0.055	0	0.211	0.083	0	0.105	0.083	0	0.238	0.028	0	0.049	0.027	0	0.183		CPI-CS0CE2A204A	ACVR_1A2A receptor_BMP8A
CPI-CS0921BB754	BMR1B_AVR2A_BMP6	complex:BMR1B_AVR2A	simple:P22004		BMP6	TRUE	TRUE	FALSE	curated	FALSE	0.041	0	0.063	0.041	0	0.196	0.022	0	0.043	0.022	0	0.177	0.027	0	0.048	0.027	0	0.182	0.01	0	0.031	0.009	0	0.165	0	0	0	0	0	0	0	0	0	0	0	0		CPI-CS0860DA460	ACVR_1A2B receptor_BMP8A
CPI-CS0AEE2FB22	ACVR1_BMPR2_BMP8A	complex:ACVR1_BMPR2	simple:Q7Z5Y6		BMP8A	TRUE	TRUE	FALSE	curated	FALSE	0	0	0	0.022	0	0	0	0	0	0.02	0	0	0	0	0	0.087	0	0	0	0	0	0.052	0	0	0	0	0	0.073	0	0	0	0	0	0.104	0	0		CPI-CS090FFEDFE	BMPR1A_BMPR2_BMP8A
CPI-CS0CE2A204A	ACVR_1A2A receptor_BMP8A	complex:ACVR_1A2A receptor	simple:Q7Z5Y6		BMP8A	TRUE	TRUE	FALSE	curated	FALSE	0	0	0	0.022	0	0	0	0	0	0.02	0	0	0	0	0	0.087	0	0	0	0	0	0.052	0	0	0	0	0	0.073	0	0	0	0	0	0.104	0	0		CPI-CS0484364A2	BMPR1B_BMPR2_BMP8A
CPI-CS0860DA460	ACVR_1A2B receptor_BMP8A	complex:ACVR_1A2B receptor	simple:Q7Z5Y6		BMP8A	TRUE	TRUE	FALSE	curated	FALSE	0	0	0	0.021	0	0	0	0	0	0.022	0	0	0	0	0	0.03	0	0	0	0	0	0.048	0	0	0	0	0	0.076	0	0	0	0	0	0.02	0	0		CPI-CS0C091F24B	BMR1A_ACR2A_BMP8A
CPI-CS090FFEDFE	BMPR1A_BMPR2_BMP8A	complex:BMPR1A_BMPR2	simple:Q7Z5Y6		BMP8A	TRUE	TRUE	FALSE	curated	FALSE	0	0	0	0.071	0	0	0	0	0	0.036	0	0	0	0	0	0.056	0	0	0	0	0	0.041	0	0	0	0	0	0.07	0	0	0	0	0	0.107	0	0		CPI-CS017A50010	BMR1A_AVR2B_BMP8A
CPI-CS0484364A2	BMPR1B_BMPR2_BMP8A	complex:BMPR1B_BMPR2	simple:Q7Z5Y6		BMP8A	TRUE	TRUE	FALSE	curated	FALSE	0	0	0	0.034	0	0	0	0	0	0.014	0	0	0	0	0	0.019	0	0	0	0	0	0.002	0	0	0	0	0	0	0	0	0	0	0	0	0	0		CPI-CS01319F57A	BMR1B_AVR2A_BMP8A
CPI-CS0C091F24B	BMR1A_ACR2A_BMP8A	complex:BMR1A_ACR2A	simple:Q7Z5Y6		BMP8A	TRUE	TRUE	FALSE	curated	FALSE	0	0	0	0.071	0	0	0	0	0	0.036	0	0	0	0	0	0.056	0	0	0	0	0	0.041	0	0	0	0	0	0.07	0	0	0	0	0	0.107	0	0		CPI-CS091BF99D0	ACVR_1A2A receptor_INHBA
CPI-CS017A50010	BMR1A_AVR2B_BMP8A	complex:BMR1A_AVR2B	simple:Q7Z5Y6		BMP8A	TRUE	TRUE	FALSE	curated	FALSE	0	0	0	0.021	0	0	0	0	0	0.022	0	0	0	0	0	0.03	0	0	0	0	0	0.048	0	0	0	0	0	0.076	0	0	0	0	0	0.02	0	0		CPI-CS04DD927C9	ACVR_1A2B receptor_INHBA
CPI-CS01319F57A	BMR1B_AVR2A_BMP8A	complex:BMR1B_AVR2A	simple:Q7Z5Y6		BMP8A	TRUE	TRUE	FALSE	curated	FALSE	0	0	0	0.034	0	0	0	0	0	0.014	0	0	0	0	0	0.019	0	0	0	0	0	0.002	0	0	0	0	0	0	0	0	0	0	0	0	0	0		CPI-CS0533A30DC	ACVR_1B2A receptor_INHBA
CPI-CS091BF99D0	ACVR_1A2A receptor_INHBA	complex:ACVR_1A2A receptor	simple:P08476		INHBA	TRUE	TRUE	FALSE	curated	FALSE	0.056	0.085	0.807	0.741	0.081	10.96	0.055	0.084	0.805	0.739	0.079	10.959	0.121	0.15	0.872	0.806	0.146	11.025	0.086	0.115	0.837	0.771	0.111	10.99	0.108	0.137	0.858	0.792	0.132	11.012	0.138	0.167	0.889	0.823	0.163	11.042		CPI-CS0C159B54D	ACVR_1B2B receptor_INHBA
CPI-CS04DD927C9	ACVR_1A2B receptor_INHBA	complex:ACVR_1A2B receptor	simple:P08476		INHBA	TRUE	TRUE	FALSE	curated	FALSE	0.055	0.085	0.806	0.74	0.08	10.959	0.057	0.086	0.807	0.741	0.081	10.961	0.065	0.094	0.815	0.749	0.089	10.969	0.082	0.112	0.833	0.767	0.107	10.986	0.11	0.14	0.861	0.795	0.135	11.014	0.055	0.084	0.805	0.739	0.079	10.959		CPI-CS0924060DB	ACVR_1C2A receptor_INHBA
CPI-CS0533A30DC	ACVR_1B2A receptor_INHBA	complex:ACVR_1B2A receptor	simple:P08476		INHBA	TRUE	TRUE	FALSE	curated	FALSE	0.073	0.102	0.823	0.757	0.097	10.977	0.112	0.141	0.863	0.797	0.137	11.016	0.054	0.083	0.804	0.738	0.078	10.958	0.158	0.187	0.908	0.842	0.182	11.062	0.153	0.182	0.903	0.838	0.178	11.057	0.111	0.14	0.861	0.796	0.136	11.015		CPI-CS0B79F5D68	ACVR_1C2B receptor_INHBA
CPI-CS0C159B54D	ACVR_1B2B receptor_INHBA	complex:ACVR_1B2B receptor	simple:P08476		INHBA	TRUE	TRUE	FALSE	curated	FALSE	0.055	0.085	0.806	0.74	0.08	10.959	0.057	0.086	0.807	0.741	0.081	10.961	0.065	0.094	0.815	0.749	0.089	10.969	0.082	0.112	0.833	0.767	0.107	10.986	0.11	0.14	0.861	0.795	0.135	11.014	0.055	0.084	0.805	0.739	0.079	10.959		CPI-CS073233FCC	ACVR_1A2A receptor_INHBB
CPI-CS0924060DB	ACVR_1C2A receptor_INHBA	complex:ACVR_1C2A receptor	simple:P08476		INHBA	TRUE	TRUE	FALSE	curated	FALSE	0.038	0.068	0.789	0.723	0.063	10.942	0.039	0.068	0.789	0.723	0.063	10.943	0.062	0.092	0.813	0.747	0.087	10.966	0	0	0	0	0	0	0	0	0	0	0	0	0.045	0.074	0.795	0.729	0.069	10.949		CPI-CS048465560	ACVR_1A2B receptor_INHBB
CPI-CS0B79F5D68	ACVR_1C2B receptor_INHBA	complex:ACVR_1C2B receptor	simple:P08476		INHBA	TRUE	TRUE	FALSE	curated	FALSE	0.038	0.068	0.789	0.723	0.063	10.942	0.039	0.068	0.789	0.723	0.063	10.943	0.062	0.092	0.813	0.747	0.087	10.966	0	0	0	0	0	0	0	0	0	0	0	0	0.045	0.074	0.795	0.729	0.069	10.949		CPI-CS02899BF8B	ACVR_1B2A receptor_INHBB
CPI-CS073233FCC	ACVR_1A2A receptor_INHBB	complex:ACVR_1A2A receptor	simple:P09529		INHBB	TRUE	TRUE	FALSE	curated	FALSE	0.145	0.289	0.194	0.027	0	0.03	0.144	0.288	0.193	0.026	0	0.029	0.21	0.354	0.259	0.092	0	0.095	0.175	0.319	0.224	0.057	0	0.06	0.197	0.341	0.246	0.079	0	0.082	0.227	0.371	0.276	0.109	0	0.112		CPI-CS085EF890A	ACVR_1B2B receptor_INHBB
CPI-CS048465560	ACVR_1A2B receptor_INHBB	complex:ACVR_1A2B receptor	simple:P09529		INHBB	TRUE	TRUE	FALSE	curated	FALSE	0.144	0.288	0.193	0.027	0	0.029	0.146	0.29	0.195	0.028	0	0.031	0.154	0.297	0.203	0.036	0	0.039	0.171	0.315	0.22	0.053	0	0.056	0.199	0.343	0.248	0.081	0	0.084	0.143	0.287	0.192	0.026	0	0.028		CPI-CS007ADC2D1	ACVR_1C2A receptor_INHBB
CPI-CS02899BF8B	ACVR_1B2A receptor_INHBB	complex:ACVR_1B2A receptor	simple:P09529		INHBB	TRUE	TRUE	FALSE	curated	FALSE	0.162	0.306	0.211	0.044	0	0.047	0.201	0.345	0.25	0.083	0	0.086	0.143	0.287	0.192	0.025	0	0.028	0.247	0.391	0.296	0.129	0	0.132	0.242	0.386	0.291	0.124	0	0.127	0.2	0.344	0.249	0.082	0	0.085		CPI-CS0A5400A6A	ACVR_1C2B receptor_INHBB
CPI-CS085EF890A	ACVR_1B2B receptor_INHBB	complex:ACVR_1B2B receptor	simple:P09529		INHBB	TRUE	TRUE	FALSE	curated	FALSE	0.144	0.288	0.193	0.027	0	0.029	0.146	0.29	0.195	0.028	0	0.031	0.154	0.297	0.203	0.036	0	0.039	0.171	0.315	0.22	0.053	0	0.056	0.199	0.343	0.248	0.081	0	0.084	0.143	0.287	0.192	0.026	0	0.028		CPI-CS0E4E75E3B	BMPR1A_BMPR2_BMP2
CPI-CS007ADC2D1	ACVR_1C2A receptor_INHBB	complex:ACVR_1C2A receptor	simple:P09529		INHBB	TRUE	TRUE	FALSE	curated	FALSE	0.127	0.271	0.176	0.009	0	0.012	0.128	0.272	0.177	0.01	0	0.013	0.151	0.295	0.2	0.034	0	0.036	0	0	0	0	0	0	0	0	0	0	0	0	0.134	0.278	0.183	0.016	0	0.019		CPI-CS028ACED72	BMPR1B_BMPR2_BMP2
CPI-CS0A5400A6A	ACVR_1C2B receptor_INHBB	complex:ACVR_1C2B receptor	simple:P09529		INHBB	TRUE	TRUE	FALSE	curated	FALSE	0.127	0.271	0.176	0.009	0	0.012	0.128	0.272	0.177	0.01	0	0.013	0.151	0.295	0.2	0.034	0	0.036	0	0	0	0	0	0	0	0	0	0	0	0	0.134	0.278	0.183	0.016	0	0.019		CPI-CS075442484	BMR1A_ACR2A_BMP2
CPI-CS0E4E75E3B	BMPR1A_BMPR2_BMP2	complex:BMPR1A_BMPR2	simple:P12643		BMP2	TRUE	TRUE	FALSE	curated	FALSE	0.102	0.103	0.181	0.254	0.155	1.496	0.067	0.068	0.145	0.219	0.12	1.461	0.087	0.088	0.165	0.239	0.14	1.481	0.072	0.073	0.151	0.224	0.125	1.466	0.101	0.102	0.18	0.253	0.154	1.495	0.138	0.14	0.217	0.29	0.191	1.532		CPI-CS0BE59B43E	BMR1A_AVR2B_BMP2
CPI-CS028ACED72	BMPR1B_BMPR2_BMP2	complex:BMPR1B_BMPR2	simple:P12643		BMP2	TRUE	TRUE	FALSE	curated	FALSE	0.065	0.066	0.144	0.217	0.118	1.459	0.045	0.047	0.124	0.197	0.099	1.439	0.05	0.052	0.129	0.202	0.103	1.444	0.033	0.034	0.112	0.185	0.086	1.427	0	0	0	0	0	0	0	0	0	0	0	0		CPI-CS08A043594	BMR1B_AVR2A_BMP2
CPI-CS075442484	BMR1A_ACR2A_BMP2	complex:BMR1A_ACR2A	simple:P12643		BMP2	TRUE	TRUE	FALSE	curated	FALSE	0.102	0.103	0.181	0.254	0.155	1.496	0.067	0.068	0.145	0.219	0.12	1.461	0.087	0.088	0.165	0.239	0.14	1.481	0.072	0.073	0.151	0.224	0.125	1.466	0.101	0.102	0.18	0.253	0.154	1.495	0.138	0.14	0.217	0.29	0.191	1.532		CPI-CS0E54FF657	BMPR1A_BMPR2_BMP4
CPI-CS0BE59B43E	BMR1A_AVR2B_BMP2	complex:BMR1A_AVR2B	simple:P12643		BMP2	TRUE	TRUE	FALSE	curated	FALSE	0.052	0.053	0.131	0.204	0.105	1.446	0.053	0.055	0.132	0.205	0.107	1.447	0.061	0.063	0.14	0.213	0.114	1.455	0.079	0.08	0.158	0.231	0.132	1.473	0.107	0.108	0.186	0.259	0.16	1.501	0.051	0.052	0.13	0.203	0.104	1.445		CPI-CS0107C51C6	BMPR1B_BMPR2_BMP4
CPI-CS08A043594	BMR1B_AVR2A_BMP2	complex:BMR1B_AVR2A	simple:P12643		BMP2	TRUE	TRUE	FALSE	curated	FALSE	0.065	0.066	0.144	0.217	0.118	1.459	0.045	0.047	0.124	0.197	0.099	1.439	0.05	0.052	0.129	0.202	0.103	1.444	0.033	0.034	0.112	0.185	0.086	1.427	0	0	0	0	0	0	0	0	0	0	0	0		CPI-CS012D15A88	BMR1A_ACR2A_BMP4
CPI-CS0E54FF657	BMPR1A_BMPR2_BMP4	complex:BMPR1A_BMPR2	simple:P12644		BMP4	TRUE	TRUE	FALSE	curated	FALSE	0.072	0.072	0	0.173	0.272	0.078	0.037	0.036	0	0.138	0.237	0.043	0.057	0.056	0	0.158	0.257	0.063	0.042	0.042	0	0.143	0.242	0.048	0.072	0.071	0	0.173	0.271	0.077	0.109	0.108	0	0.21	0.308	0.114		CPI-CS0BCDC40FC	BMR1A_AVR2B_BMP4
CPI-CS0107C51C6	BMPR1B_BMPR2_BMP4	complex:BMPR1B_BMPR2	simple:P12644		BMP4	TRUE	TRUE	FALSE	curated	FALSE	0.035	0.034	0	0.136	0.235	0.041	0.016	0.015	0	0.117	0.216	0.022	0.021	0.02	0	0.122	0.22	0.027	0.004	0.003	0	0.105	0.203	0.009	0	0	0	0	0	0	0	0	0	0	0	0		CPI-CS02957B1BF	BMR1B_AVR2A_BMP4
CPI-CS012D15A88	BMR1A_ACR2A_BMP4	complex:BMR1A_ACR2A	simple:P12644		BMP4	TRUE	TRUE	FALSE	curated	FALSE	0.072	0.072	0	0.173	0.272	0.078	0.037	0.036	0	0.138	0.237	0.043	0.057	0.056	0	0.158	0.257	0.063	0.042	0.042	0	0.143	0.242	0.048	0.072	0.071	0	0.173	0.271	0.077	0.109	0.108	0	0.21	0.308	0.114		CPI-CS09CECD20D	BMPR1A_BMPR2_GDF5
CPI-CS0BCDC40FC	BMR1A_AVR2B_BMP4	complex:BMR1A_AVR2B	simple:P12644		BMP4	TRUE	TRUE	FALSE	curated	FALSE	0.023	0.022	0	0.124	0.222	0.028	0.024	0.023	0	0.125	0.224	0.03	0.032	0.031	0	0.133	0.231	0.037	0.05	0.049	0	0.15	0.249	0.055	0.078	0.077	0	0.178	0.277	0.083	0.022	0.021	0	0.123	0.221	0.027		CPI-CS0700FDD27	BMPR1B_BMPR2_GDF5
CPI-CS02957B1BF	BMR1B_AVR2A_BMP4	complex:BMR1B_AVR2A	simple:P12644		BMP4	TRUE	TRUE	FALSE	curated	FALSE	0.035	0.034	0	0.136	0.235	0.041	0.016	0.015	0	0.117	0.216	0.022	0.021	0.02	0	0.122	0.22	0.027	0.004	0.003	0	0.105	0.203	0.009	0	0	0	0	0	0	0	0	0	0	0	0		CPI-CS0DAA66443	BMR1A_ACR2A_GDF5
CPI-CS09CECD20D	BMPR1A_BMPR2_GDF5	complex:BMPR1A_BMPR2	simple:P43026		GDF5	TRUE	TRUE	FALSE	curated	FALSE	0	0	0	0	0	0	0	0	0	0	0	0	0	0	0	0	0	0	0	0	0	0	0	0	0	0	0	0	0	0	0	0	0	0	0	0		CPI-CS036BF2AC7	BMR1A_AVR2B_GDF5
CPI-CS0700FDD27	BMPR1B_BMPR2_GDF5	complex:BMPR1B_BMPR2	simple:P43026		GDF5	TRUE	TRUE	FALSE	curated	FALSE	0	0	0	0	0	0	0	0	0	0	0	0	0	0	0	0	0	0	0	0	0	0	0	0	0	0	0	0	0	0	0	0	0	0	0	0		CPI-CS069E2161D	BMR1B_AVR2A_GDF5
CPI-CS0DAA66443	BMR1A_ACR2A_GDF5	complex:BMR1A_ACR2A	simple:P43026		GDF5	TRUE	TRUE	FALSE	curated	FALSE	0	0	0	0	0	0	0	0	0	0	0	0	0	0	0	0	0	0	0	0	0	0	0	0	0	0	0	0	0	0	0	0	0	0	0	0		CPI-CS0CFA0E4C5	BMPR1A_BMPR2_GDF7
CPI-CS036BF2AC7	BMR1A_AVR2B_GDF5	complex:BMR1A_AVR2B	simple:P43026		GDF5	TRUE	TRUE	FALSE	curated	FALSE	0	0	0	0	0	0	0	0	0	0	0	0	0	0	0	0	0	0	0	0	0	0	0	0	0	0	0	0	0	0	0	0	0	0	0	0		CPI-CS027D7A724	BMPR1B_BMPR2_GDF7
CPI-CS069E2161D	BMR1B_AVR2A_GDF5	complex:BMR1B_AVR2A	simple:P43026		GDF5	TRUE	TRUE	FALSE	curated	FALSE	0	0	0	0	0	0	0	0	0	0	0	0	0	0	0	0	0	0	0	0	0	0	0	0	0	0	0	0	0	0	0	0	0	0	0	0		CPI-CS05789C9A0	BMR1A_ACR2A_GDF7
CPI-CS0CFA0E4C5	BMPR1A_BMPR2_GDF7	complex:BMPR1A_BMPR2	simple:Q7Z4P5		GDF7	TRUE	TRUE	FALSE	curated	FALSE	0.091	0.071	0.199	0.475	0.494	0.181	0.056	0.036	0.164	0.44	0.459	0.146	0.076	0.056	0.184	0.46	0.479	0.166	0.061	0.041	0.169	0.445	0.464	0.151	0.09	0.071	0.198	0.475	0.493	0.181	0.127	0.108	0.235	0.512	0.531	0.218		CPI-CS0E5078EDE	BMR1A_AVR2B_GDF7
CPI-CS027D7A724	BMPR1B_BMPR2_GDF7	complex:BMPR1B_BMPR2	simple:Q7Z4P5		GDF7	TRUE	TRUE	FALSE	curated	FALSE	0.054	0.034	0.162	0.438	0.457	0.144	0.034	0.015	0.143	0.419	0.438	0.125	0.039	0.02	0.147	0.424	0.443	0.13	0.022	0.003	0.13	0.407	0.425	0.113	0	0	0	0	0	0	0	0	0	0	0	0		CPI-CS0BDA0D08C	BMR1B_AVR2A_GDF7
CPI-CS05789C9A0	BMR1A_ACR2A_GDF7	complex:BMR1A_ACR2A	simple:Q7Z4P5		GDF7	TRUE	TRUE	FALSE	curated	FALSE	0.091	0.071	0.199	0.475	0.494	0.181	0.056	0.036	0.164	0.44	0.459	0.146	0.076	0.056	0.184	0.46	0.479	0.166	0.061	0.041	0.169	0.445	0.464	0.151	0.09	0.071	0.198	0.475	0.493	0.181	0.127	0.108	0.235	0.512	0.531	0.218		CPI-CS0569B9B91	BMPR1B_BMPR2_BMPR1A
CPI-CS0E5078EDE	BMR1A_AVR2B_GDF7	complex:BMR1A_AVR2B	simple:Q7Z4P5		GDF7	TRUE	TRUE	FALSE	curated	FALSE	0.041	0.022	0.149	0.425	0.444	0.131	0.042	0.023	0.151	0.427	0.446	0.133	0.05	0.031	0.158	0.435	0.454	0.141	0.068	0.049	0.176	0.452	0.471	0.158	0.096	0.077	0.204	0.48	0.499	0.186	0.04	0.021	0.148	0.425	0.443	0.13		CPI-CS04F78ACD6	ACVR_1B2A receptor_GDF11
CPI-CS0BDA0D08C	BMR1B_AVR2A_GDF7	complex:BMR1B_AVR2A	simple:Q7Z4P5		GDF7	TRUE	TRUE	FALSE	curated	FALSE	0.054	0.034	0.162	0.438	0.457	0.144	0.034	0.015	0.143	0.419	0.438	0.125	0.039	0.02	0.147	0.424	0.443	0.13	0.022	0.003	0.13	0.407	0.425	0.113	0	0	0	0	0	0	0	0	0	0	0	0		CPI-CS0384572FE	ACVR_1B2B receptor_GDF11
CPI-CS0569B9B91	BMPR1B_BMPR2_BMPR1A	complex:BMPR1B_BMPR2	simple:P36894		BMPR1A	FALSE	TRUE	TRUE	curated	FALSE	0.102	0.067	0.087	0.072	0.101	0.138	0.082	0.047	0.067	0.052	0.082	0.119	0.087	0.052	0.072	0.057	0.087	0.124	0.07	0.035	0.055	0.04	0.07	0.107	0	0	0	0	0	0	0	0	0	0	0	0		CPI-CS06C0EEFCB	ACVR_1B2B receptor_GDF10
CPI-CS04F78ACD6	ACVR_1B2A receptor_GDF11	complex:ACVR_1B2A receptor	simple:O95390		GDF11	TRUE	TRUE	FALSE	curated	FALSE	0.312	0.2	0.197	0.183	0.172	0.203	0.351	0.24	0.236	0.222	0.212	0.242	0.293	0.181	0.177	0.164	0.153	0.184	0.397	0.285	0.281	0.268	0.257	0.288	0.392	0.281	0.277	0.263	0.253	0.283	0.35	0.239	0.235	0.221	0.211	0.241		CPI-CS0B2F2EF5D	ACVR_1B2B receptor_GDF3
CPI-CS0384572FE	ACVR_1B2B receptor_GDF11	complex:ACVR_1B2B receptor	simple:O95390		GDF11	TRUE	TRUE	FALSE	curated	FALSE	0.294	0.183	0.179	0.166	0.155	0.185	0.296	0.185	0.181	0.167	0.156	0.187	0.304	0.192	0.188	0.175	0.164	0.195	0.321	0.21	0.206	0.193	0.182	0.212	0.349	0.238	0.234	0.221	0.21	0.24	0.293	0.182	0.178	0.165	0.154	0.184		CPI-CS067298D94	FLT1 complex_VEGFA
CPI-CS06C0EEFCB	ACVR_1B2B receptor_GDF10	complex:ACVR_1B2B receptor	simple:P55107		GDF10	TRUE	TRUE	FALSE	curated	FALSE	0	0	0	0	0.033	0	0	0	0	0	0.035	0	0	0	0	0	0.043	0	0	0	0	0	0.06	0	0	0	0	0	0.088	0	0	0	0	0	0.033	0		CPI-CS073D36B1D	FLT1 complex_PGF
CPI-CS0B2F2EF5D	ACVR_1B2B receptor_GDF3	complex:ACVR_1B2B receptor	simple:Q9NR23		GDF3	TRUE	TRUE	FALSE	curated	FALSE	0.05	0	0	0	0	0	0.052	0	0	0	0	0	0.06	0	0	0	0	0	0.077	0	0	0	0	0	0.105	0	0	0	0	0	0.05	0	0	0	0	0		CPI-CS077F1340A	FLT1 complex_VEGFB
CPI-CS067298D94	FLT1 complex_VEGFA	complex:FLT1 complex	simple:P15692		VEGFA	TRUE	TRUE	FALSE	curated	FALSE	2.638	1.369	3.403	4.559	2.195	4.124	2.624	1.355	3.389	4.545	2.181	4.11	2.664	1.395	3.429	4.585	2.22	4.15	2.62	1.351	3.385	4.541	2.177	4.106	0	0	0	0	0	0	2.684	1.415	3.449	4.605	2.241	4.17		CPI-CS0E5D1ECCE	PlexinA1_complex3_SEMA3A
CPI-CS073D36B1D	FLT1 complex_PGF	complex:FLT1 complex	simple:P49763		PGF	TRUE	TRUE	FALSE	curated	FALSE	0.026	0	0	0	0	0	0.012	0	0	0	0	0	0.052	0	0	0	0	0	0.008	0	0	0	0	0	0	0	0	0	0	0	0.072	0	0	0	0	0		CPI-CS0D238C22B	PlexinA2_complex1_SEMA3A
CPI-CS077F1340A	FLT1 complex_VEGFB	complex:FLT1 complex	simple:P49765		VEGFB	TRUE	TRUE	FALSE	curated	FALSE	0.343	0.313	0.356	0.25	0.157	0.378	0.329	0.3	0.342	0.236	0.143	0.364	0.368	0.339	0.382	0.276	0.183	0.404	0.325	0.295	0.338	0.232	0.139	0.36	0	0	0	0	0	0	0.389	0.36	0.402	0.296	0.203	0.425		CPI-CS0AA769F5B	PlexinA3_complex1_SEMA3A
CPI-CS0E5D1ECCE	PlexinA1_complex3_SEMA3A	complex:PlexinA1_complex3	simple:Q14563		SEMA3A	TRUE	TRUE	FALSE	curated	FALSE	0.166	0.208	0.19	0.086	0	0	0.264	0.306	0.288	0.185	0	0	0.211	0.253	0.235	0.132	0	0	0.308	0.35	0.332	0.229	0	0	0.151	0.194	0.176	0.072	0	0	0.192	0.234	0.216	0.112	0	0		CPI-CS0AB19226A	PlexinA4_complex1_SEMA3A
CPI-CS0D238C22B	PlexinA2_complex1_SEMA3A	complex:PlexinA2_complex1	simple:Q14563		SEMA3A	TRUE	TRUE	FALSE	curated	FALSE	0.216	0.258	0.24	0.137	0	0	0.163	0.205	0.187	0.084	0	0	0.201	0.243	0.225	0.122	0	0	0.101	0.143	0.125	0.022	0	0	0	0	0	0	0	0	0.169	0.211	0.193	0.09	0	0		CPI-SC0859FAC25	IFNE_Type I IFNR
CPI-CS0AA769F5B	PlexinA3_complex1_SEMA3A	complex:PlexinA3_complex1	simple:Q14563		SEMA3A	TRUE	TRUE	FALSE	curated	FALSE	0.141	0.183	0.165	0.062	0	0	0.18	0.222	0.204	0.1	0	0	0.156	0.198	0.18	0.077	0	0	0.397	0.439	0.421	0.318	0	0	0.407	0.449	0.431	0.328	0	0	0.762	0.804	0.786	0.682	0	0		CPI-CS06072FF4E	IL1 receptor_IL1A
CPI-CS0AB19226A	PlexinA4_complex1_SEMA3A	complex:PlexinA4_complex1	simple:Q14563		SEMA3A	TRUE	TRUE	FALSE	curated	FALSE	0.096	0.138	0.12	0.016	0	0	0	0	0	0	0	0	0.117	0.159	0.141	0.037	0	0	0.248	0.29	0.272	0.169	0	0	0.283	0.325	0.307	0.204	0	0	0	0	0	0	0	0		CPI-CS0AC5142FA	IL1 receptor inhibitor_IL1A
CPI-SC0859FAC25	IFNE_Type I IFNR	simple:Q86WN2	complex:Type I IFNR	IFNE		TRUE	FALSE	TRUE	curated	FALSE	0.143	0.147	0.072	0.107	0.042	0.236	0.139	0.142	0.067	0.102	0.038	0.231	0.16	0.163	0.088	0.123	0.059	0.252	0.136	0.139	0.064	0.1	0.035	0.229	0.138	0.142	0.066	0.102	0.037	0.231	0	0	0	0	0	0		CPI-CS05426BFFA	IL1 receptor_IL1B
CPI-CS06072FF4E	IL1 receptor_IL1A	complex:IL1 receptor	simple:P01583		IL1A	TRUE	TRUE	FALSE	curated	FALSE	0.374	0.558	0.485	0.181	0.141	0.349	0.418	0.601	0.528	0.224	0.185	0.392	0.381	0.565	0.492	0.187	0.148	0.355	0.313	0.496	0.423	0.119	0.079	0.287	0.286	0.47	0.397	0.093	0.053	0.261	0.301	0.485	0.412	0.108	0.068	0.276		CPI-CS008C9D6E5	IL1 receptor inhibitor_IL1B
CPI-CS0AC5142FA	IL1 receptor inhibitor_IL1A	complex:IL1 receptor inhibitor	simple:P01583		IL1A	TRUE	TRUE	FALSE	curated	FALSE	0.374	0.558	0.485	0.181	0.141	0.349	0.418	0.601	0.528	0.224	0.185	0.392	0.381	0.565	0.492	0.187	0.148	0.355	0.313	0.496	0.423	0.119	0.079	0.287	0.286	0.47	0.397	0.093	0.053	0.261	0.301	0.485	0.412	0.108	0.068	0.276		CPI-CS0DEBE7B69	IL1 receptor_IL1RN
CPI-CS05426BFFA	IL1 receptor_IL1B	complex:IL1 receptor	simple:P01584		IL1B	TRUE	TRUE	FALSE	curated	FALSE	0.227	0.431	1.058	3.098	1.866	2.622	0.271	0.474	1.101	3.141	1.91	2.666	0.234	0.438	1.065	3.105	1.873	2.629	0.166	0.369	0.996	3.036	1.804	2.561	0.14	0.343	0.97	3.01	1.778	2.534	0.155	0.358	0.985	3.025	1.793	2.549		CPI-CS085E95BC1	IL1 receptor inhibitor_IL1RN
CPI-CS008C9D6E5	IL1 receptor inhibitor_IL1B	complex:IL1 receptor inhibitor	simple:P01584		IL1B	TRUE	TRUE	FALSE	curated	FALSE	0.227	0.431	1.058	3.098	1.866	2.622	0.271	0.474	1.101	3.141	1.91	2.666	0.234	0.438	1.065	3.105	1.873	2.629	0.166	0.369	0.996	3.036	1.804	2.561	0.14	0.343	0.97	3.01	1.778	2.534	0.155	0.358	0.985	3.025	1.793	2.549		CPI-CS0DDFD82E7	IL11 receptor_IL11
CPI-CS0DEBE7B69	IL1 receptor_IL1RN	complex:IL1 receptor	simple:P18510		IL1RN	TRUE	TRUE	FALSE	curated	FALSE	0.162	0.801	0.538	0.195	0.097	1.086	0.206	0.844	0.581	0.239	0.14	1.129	0.169	0.808	0.545	0.202	0.104	1.093	0.1	0.739	0.476	0.134	0.035	1.024	0.074	0.713	0.45	0.108	0.009	0.998	0.089	0.728	0.465	0.123	0.024	1.013		CPI-CS0553FFC41	IL20 receptor Type I_IL24
CPI-CS085E95BC1	IL1 receptor inhibitor_IL1RN	complex:IL1 receptor inhibitor	simple:P18510		IL1RN	TRUE	TRUE	FALSE	curated	FALSE	0.162	0.801	0.538	0.195	0.097	1.086	0.206	0.844	0.581	0.239	0.14	1.129	0.169	0.808	0.545	0.202	0.104	1.093	0.1	0.739	0.476	0.134	0.035	1.024	0.074	0.713	0.45	0.108	0.009	0.998	0.089	0.728	0.465	0.123	0.024	1.013		CPI-CS0AB365861	IL20 receptor Type I_IL20
CPI-CS0DDFD82E7	IL11 receptor_IL11	complex:IL11 receptor	simple:P20809		IL11	TRUE	TRUE	FALSE	curated	FALSE	0.014	0.037	0.101	0.119	0	2.605	0	0	0	0	0	0	0	0	0	0	0	0	0.027	0.049	0.114	0.132	0	2.618	0.022	0.044	0.109	0.126	0	2.613	0.01	0.033	0.097	0.115	0	2.601		CPI-CS0645666B0	IL20 receptor Type I_IL19
CPI-CS0553FFC41	IL20 receptor Type I_IL24	complex:IL20 receptor Type I	simple:Q13007		IL24	TRUE	TRUE	FALSE	curated	FALSE	0.009	0	0.054	0.062	0	0.992	0.016	0	0.061	0.069	0	0.999	0	0	0	0	0	0	0.011	0	0.055	0.063	0	0.993	0	0	0	0	0	0	0	0	0	0	0	0		CPI-CS0C59AF029	IL33 receptor_IL33
CPI-CS0AB365861	IL20 receptor Type I_IL20	complex:IL20 receptor Type I	simple:Q9NYY1		IL20	TRUE	TRUE	FALSE	curated	FALSE	0.006	0	0	0.007	0	0.137	0.013	0	0	0.014	0	0.144	0	0	0	0	0	0	0.007	0	0	0.008	0	0.138	0	0	0	0	0	0	0	0	0	0	0	0		CPI-CS0D9B5AB86	IL36 receptor_IL36G
CPI-CS0645666B0	IL20 receptor Type I_IL19	complex:IL20 receptor Type I	simple:Q9UHD0		IL19	TRUE	TRUE	FALSE	curated	FALSE	0.01	0	0	0.004	0	0	0.017	0	0	0.01	0	0	0	0	0	0	0	0	0.011	0	0	0.005	0	0	0	0	0	0	0	0	0	0	0	0	0	0		CPI-CS04BB8F1EC	IL36 receptor_IL36RN
CPI-CS0C59AF029	IL33 receptor_IL33	complex:IL33 receptor	simple:O95760		IL33	TRUE	TRUE	FALSE	curated	FALSE	0.117	0.094	0.095	0.099	0	0.112	0.161	0.138	0.138	0.142	0	0.155	0.124	0.101	0.102	0.106	0	0.119	0.055	0.033	0.033	0.037	0	0.05	0.029	0.006	0.007	0.011	0	0.024	0.044	0.022	0.022	0.026	0	0.039		CPI-CS063AE1C91	IL6 receptor_IL6
CPI-CS0D9B5AB86	IL36 receptor_IL36G	complex:IL36 receptor	simple:Q9NZH8		IL36G	TRUE	TRUE	FALSE	curated	FALSE	0	0	0	0	0	0	0	0	0	0	0	0	0	0	0	0	0	0	0	0	0	0	0	0	0	0	0	0	0	0	0	0	0	0	0	0		CPI-CS07B61574B	LIFR_LIF
CPI-CS04BB8F1EC	IL36 receptor_IL36RN	complex:IL36 receptor	simple:Q9UBH0		IL36RN	TRUE	TRUE	FALSE	curated	FALSE	0	0.014	0	0.03	0	0.051	0	0	0	0	0	0	0	0.01	0	0.026	0	0.047	0	0.012	0	0.028	0	0.049	0	0	0	0	0	0	0	0	0	0	0	0		CPI-SC033E22B14	PDGFB_PDGFR complex
CPI-CS063AE1C91	IL6 receptor_IL6	complex:IL6 receptor	simple:P05231		IL6	TRUE	TRUE	FALSE	curated	FALSE	0.451	0.355	0.525	0.34	0	0.494	0.278	0.182	0.352	0.168	0	0.321	0.351	0.255	0.425	0.241	0	0.394	0.218	0.122	0.292	0.108	0	0.261	0.246	0.15	0.32	0.135	0	0.289	0.227	0.131	0.301	0.117	0	0.27		CPI-SC001669E22	GDF11_TGFR_AVR2A
CPI-CS07B61574B	LIFR_LIF	complex:LIFR	simple:P15018		LIF	TRUE	TRUE	FALSE	curated	FALSE	0.37	0.747	0.593	0.051	0.05	0.272	0.373	0.75	0.596	0.054	0.053	0.275	0.411	0.789	0.634	0.092	0.091	0.313	0.553	0.931	0.776	0.234	0.233	0.455	0.555	0.932	0.778	0.236	0.235	0.457	0.378	0.755	0.601	0.059	0.058	0.28		CPI-SC017215F7F	GDF11_TGFR_AVR2B
CPI-SC033E22B14	PDGFB_PDGFR complex	simple:P01127	complex:PDGFR complex	PDGFB		TRUE	FALSE	TRUE	curated	FALSE	0.144	0.045	0.446	1.909	2.304	2.183	0.195	0.096	0.497	1.96	2.356	2.234	0.197	0.098	0.499	1.962	2.357	2.236	0.153	0.054	0.456	1.919	2.314	2.192	0	0	0	0	0	0	0.125	0.026	0.427	1.89	2.285	2.163		CPI-SC098C06330	TGFB1_TGFbeta receptor1
CPI-SC001669E22	GDF11_TGFR_AVR2A	simple:O95390	complex:TGFR_AVR2A	GDF11		TRUE	FALSE	TRUE	curated	FALSE	0.312	0.351	0.293	0.397	0.392	0.35	0.2	0.24	0.181	0.285	0.281	0.239	0.197	0.236	0.177	0.281	0.277	0.235	0.183	0.222	0.164	0.268	0.263	0.221	0.172	0.212	0.153	0.257	0.253	0.211	0.203	0.242	0.184	0.288	0.283	0.241		CPI-SC0D5CFA431	TGFB3_TGFbeta receptor1
CPI-SC017215F7F	GDF11_TGFR_AVR2B	simple:O95390	complex:TGFR_AVR2B	GDF11		TRUE	FALSE	TRUE	curated	FALSE	0.294	0.296	0.304	0.321	0.349	0.293	0.183	0.185	0.192	0.21	0.238	0.182	0.179	0.181	0.188	0.206	0.234	0.178	0.166	0.167	0.175	0.193	0.221	0.165	0.155	0.156	0.164	0.182	0.21	0.154	0.185	0.187	0.195	0.212	0.24	0.184		CPI-SC03DD946B2	TGFB2_TGFbeta receptor1
CPI-SC098C06330	TGFB1_TGFbeta receptor1	simple:P01137	complex:TGFbeta receptor1	TGFB1		TRUE	FALSE	TRUE	curated	FALSE	0.055	0.073	0.107	0.207	0.161	0.145	0.05	0.069	0.102	0.202	0.156	0.141	0.082	0.101	0.135	0.235	0.189	0.173	0.167	0.186	0.219	0.319	0.273	0.257	0.076	0.095	0.128	0.228	0.182	0.166	0.047	0.066	0.099	0.199	0.153	0.138		CPI-SC0984894BC	TGFB1_TGFbeta receptor2
CPI-SC0D5CFA431	TGFB3_TGFbeta receptor1	simple:P10600	complex:TGFbeta receptor1	TGFB3		TRUE	FALSE	TRUE	curated	FALSE	0.034	0.053	0.087	0.187	0.141	0.125	0.032	0.05	0.084	0.184	0.138	0.122	0	0	0	0	0	0	0.036	0.055	0.089	0.189	0.143	0.127	0.058	0.077	0.11	0.21	0.164	0.149	0.066	0.085	0.118	0.218	0.172	0.157		CPI-SC0077CEB82	TGFB3_TGFbeta receptor2
CPI-SC03DD946B2	TGFB2_TGFbeta receptor1	simple:P61812	complex:TGFbeta receptor1	TGFB2		TRUE	FALSE	TRUE	curated	FALSE	0.091	0.109	0.143	0.243	0.197	0.181	0.056	0.075	0.108	0.208	0.163	0.147	0.062	0.081	0.114	0.214	0.169	0.153	0.085	0.104	0.137	0.237	0.191	0.176	0	0	0	0	0	0	0	0	0	0	0	0		CPI-SC032246C72	TGFB2_TGFbeta receptor2
CPI-SC0984894BC	TGFB1_TGFbeta receptor2	simple:P01137	complex:TGFbeta receptor2	TGFB1		TRUE	FALSE	TRUE	curated	FALSE	0.046	0.044	0.111	0.076	0.097	0.128	0.041	0.04	0.106	0.071	0.093	0.123	0.074	0.072	0.139	0.104	0.125	0.156	0.158	0.157	0.223	0.188	0.21	0.24	0.067	0.066	0.132	0.097	0.119	0.149	0.038	0.037	0.103	0.068	0.09	0.12		CPI-SC0E5218AA4	NRG1_a6b4 complex
CPI-SC0077CEB82	TGFB3_TGFbeta receptor2	simple:P10600	complex:TGFbeta receptor2	TGFB3		TRUE	FALSE	TRUE	curated	FALSE	0.025	0.024	0.09	0.055	0.077	0.107	0.023	0.021	0.088	0.053	0.074	0.105	0	0	0	0	0	0	0.028	0.026	0.093	0.058	0.079	0.109	0.049	0.048	0.114	0.079	0.101	0.131	0.057	0.056	0.122	0.087	0.109	0.139		CPI-SC0A68C5F13	IGF1_a6b4 complex
CPI-SC032246C72	TGFB2_TGFbeta receptor2	simple:P61812	complex:TGFbeta receptor2	TGFB2		TRUE	FALSE	TRUE	curated	FALSE	0.082	0.081	0.147	0.112	0.133	0.164	0.047	0.046	0.112	0.077	0.099	0.129	0.053	0.052	0.118	0.083	0.105	0.135	0.076	0.075	0.141	0.106	0.128	0.158	0	0	0	0	0	0	0	0	0	0	0	0		CPI-SC0FDB4B6D9	GDF9_TGFR_BMPR2
CPI-SC0E5218AA4	NRG1_a6b4 complex	simple:Q02297	complex:a6b4 complex	NRG1		TRUE	TRUE	FALSE	curated	TRUE	0	0	0	0	0	0	0	0	0	0	0	0	0.273	0.712	0.466	0.062	0.058	0.123	0.236	0.675	0.429	0.025	0.021	0.086	0	0	0	0	0	0	0.253	0.693	0.446	0.043	0.039	0.104		CPI-CS0BAF97962	PDGFR complex_PDGFD
CPI-SC0A68C5F13	IGF1_a6b4 complex	simple:P05019	complex:a6b4 complex	IGF1		TRUE	FALSE	FALSE	curated	TRUE	0.253	0.692	0.446	0.042	0.038	0.103	0	0	0	0	0	0	0.231	0.67	0.424	0.02	0.016	0.081	0.331	0.77	0.524	0.12	0.116	0.181	0.248	0.687	0.441	0.037	0.033	0.098	0	0	0	0	0	0		CPI-CS0C57A3081	PlexinA1_complex1_SEMA6D
CPI-SC0FDB4B6D9	GDF9_TGFR_BMPR2	simple:O60383	complex:TGFR_BMPR2	GDF9		TRUE	FALSE	TRUE	curated	FALSE	0.031	0.049	0.083	0.183	0.137	0.121	0	0	0	0	0	0	0.035	0.054	0.088	0.188	0.142	0.126	0.035	0.054	0.087	0.187	0.141	0.125	0	0	0	0	0	0	0	0	0	0	0	0
CPI-CS0BAF97962	PDGFR complex_PDGFD	complex:PDGFR complex	simple:Q9GZP0		PDGFD	TRUE	TRUE	FALSE	curated	FALSE	0.119	0.124	0.123	0.177	0.127	0.13	0.02	0.025	0.024	0.078	0.028	0.031	0.421	0.426	0.425	0.479	0.429	0.432	1.884	1.889	1.888	1.943	1.892	1.895	2.279	2.284	2.284	2.338	2.287	2.29	2.158	2.163	2.162	2.216	2.166	2.169
CPI-CS0C57A3081	PlexinA1_complex1_SEMA6D	complex:PlexinA1_complex1	simple:Q8NFY4		SEMA6D	FALSE	TRUE	FALSE	curated	FALSE	0	0	0	0.028	0.032	0	0	0	0	0.01	0.015	0	0	0	0	0.057	0.061	0	0	0	0	0.265	0.27	0	0	0	0	0.071	0.075	0	0	0	0	0.112	0.116	0
[truncated: 45 more columns]
