# Supplementary material for: Modelling the impact of decidual senescence on embryo implantation in human endometrial assembloids
Source: eLife. 2021 Sep 6;10:e69603. doi: 10.7554/eLife.69603 (PMC8523170; doi:10.7554/eLife.69603)
Supplement: Figure 5—source data 1. — Specified pairwise comparisons were generated in Seurat v3 using FindMarkers. Supports Figure 5C. [file elife-69603-fig5-data1.xlsx]

## Sheet: Figure 5-Source Data 1
Figure 5-Source Data 1 - Differentially Expressed Genes for Day 4 populations treated with and without dasatinib
Supports Figure 5C
Specified pairwise comparisons were generated in Seurat v3 using FindMarkers.
SS3									SS4									SS5									TP									EpS4									EpS5
(ident.1 = SS3_D4 [avg_logFC +ve], ident.2 = SS3_D4Dasa [avg_logFC -ve])									(ident.1 = SS4_D4 [avg_logFC +ve], ident.2 = SS4_D4Dasa [avg_logFC -ve])									(ident.1 = SS5_D4 [avg_logFC +ve], ident.2 = SS5_D4Dasa [avg_logFC -ve])									(ident.1 = TP_D4 [avg_logFC +ve], ident.2 = TP_D4Dasa [avg_logFC -ve])									(ident.1 = EpS4_D4 [avg_logFC +ve], ident.2 = EpS4_D4Dasa [avg_logFC -ve])									(ident.1 =EpS5_D4 [avg_logFC +ve], ident.2 = EpS5_D4Dasa [avg_logFC -ve])
Gene IDs	p_val	avg_logFC	pct.1	pct.2	p_val_adj	Day 4	Day 4 + dasatinib		Gene IDs	p_val	avg_logFC	pct.1	pct.2	p_val_adj	Day 4	Day 4 + dasatinib		Gene IDs	p_val	avg_logFC	pct.1	pct.2	p_val_adj	Day 4	Day 4 + dasatinib		Gene IDs	p_val	avg_logFC	pct.1	pct.2	p_val_adj	Day 4	Day 4 + dasatinib		Gene IDs	p_val	avg_logFC	pct.1	pct.2	p_val_adj	Day 4	Day 4 + dasatinib		Gene IDs	p_val	avg_logFC	pct.1	pct.2
ABI2	2.4615e-07	0.283757	0.311	0.152	0.00509457	0.944034	0.463759		BOC	1.54648e-09	0.329173	0.23	0.056	3.20076e-05	0.647085	0.185108		CYP27B1	8.63278e-09	-0.877524	0	0.286	0.000178673	0	1.40494		FTH1	2.39272e-15	1.0281	0.861	0.819	4.95222e-11	49.9089	17.2094		ACSL5	1.2749e-09	0.461308	0.427	0.238	2.63866e-05	2.89277	1.45423		ANXA2	1.18314e-07	0.550549	0.937	0.904
ADAMTS2	5.81634e-18	0.363141	0.755	0.479	1.20381e-13	6.71665	4.36684		CMTM3	1.01596e-06	0.329593	0.391	0.181	0.0210273	1.00729	0.443672		EIF3K	9.10939e-08	-1.44666	0.043	0.571	0.00188537	0.148608	3.88031		MMP7	1.40513e-08	1.18759	0.488	0.268	0.000290819	11.1401	2.70219		ADAMTS1	9.30775e-13	0.661815	0.624	0.419	1.92642e-08	10.4762	4.92073		LAMC2	1.59042e-07	0.887202	0.69	0.47
ADGRL2	2.82355e-08	0.31757	0.206	0.07	0.000584389	0.780013	0.295699		COL1A2	1.22029e-06	0.272476	0.989	0.963	0.0252563	35.6119	26.8797		IGF2	8.63278e-09	-0.970871	0	0.286	0.000178673	0	1.64024		MT-RNR2	2.40067e-15	0.697207	0.951	0.906	4.96867e-11	93.6588	46.1377		ATF3	1.38691e-07	0.292608	0.61	0.459	0.00287048	5.74769	4.0359		MMP7	1.57536e-07	1.06509	0.899	0.8
AHCY	1.48179e-13	0.432959	0.379	0.147	3.06686e-09	1.78471	0.806129		EDNRB	1.29132e-09	0.665288	0.782	0.592	2.67264e-05	8.08019	3.66836		LINC00707	8.63278e-09	-0.93607	0	0.286	0.000178673	0	1.54994		STC1	8.78976e-07	1.23422	0.486	0.331	0.0181922	12.7301	2.99631		BTG2	4.79382e-09	0.41484	0.576	0.404	9.92177e-05	5.24728	3.12599		CA12	1.92234e-07	-0.756147	0.487	0.696
AK3	1.34294e-08	0.364471	0.33	0.158	0.000277947	1.18631	0.518532		FN1	1.88982e-09	0.597928	0.678	0.444	3.91136e-05	4.1564	1.83576		SFRP4	8.63278e-09	-0.774632	0	0.286	0.000178673	0	1.16979		TMSB4X	2.45361e-07	0.883013	0.619	0.48	0.00507825	17.3556	6.5907		CFTR	1.83078e-08	0.518288	0.263	0.12	0.000378917	1.91086	0.733528		PAEP	2.64391e-10	-1.0851	0.633	0.861
AKAP13	7.61928e-10	0.314597	0.812	0.647	1.57696e-05	10.5103	7.40348		GPNMB	1.07514e-10	0.676118	0.701	0.451	2.22522e-06	4.52262	1.80873											AAMP	5.35439e-10	-0.433826	0.049	0.228	1.1082e-05	0.46829	1.26579		CRISP3	2.30985e-07	0.622678	0.318	0.177	0.00478069	3.09489	1.19693		RIMKLB	8.73642e-08	-0.886025	0.373	0.661
ANTXR2	3.93731e-14	0.471459	0.408	0.158	8.14905e-10	1.89699	0.807984		KIF26B	3.07034e-09	0.37809	0.356	0.124	6.35468e-05	0.89985	0.301718											ABL1	1.92744e-12	-0.301931	0.019	0.181	3.98922e-08	0.137782	0.538813		CXCL2	5.187e-08	0.354866	0.516	0.341	0.00107355	6.88102	4.5267		RNASET2	6.45595e-09	-0.500122	0.943	0.957
ARL4D	1.59012e-15	0.533454	0.359	0.126	3.29108e-11	1.46401	0.445329		LUM	2.52157e-20	0.524766	0.989	0.968	5.21889e-16	55.908	32.6721											ACO2	5.09726e-12	-0.312271	0.021	0.181	1.05498e-07	0.134382	0.550161		DDIT4	7.42587e-10	0.506394	0.535	0.364	1.53693e-05	4.5845	2.36558		SLC45A4	1.50048e-07	-0.630619	0.101	0.357
ARMT1	9.08203e-14	0.36945	0.353	0.131	1.87971e-09	1.36442	0.634083		MFAP4	4.28489e-08	0.392647	0.966	0.854	0.000886844	17.2185	11.3023											ACTB	1.00566e-07	-0.357368	0.075	0.252	0.00208141	0.687201	1.41196		DDX5	2.70118e-09	0.287862	0.829	0.699	5.59063e-05	11.9507	8.71127		SLPI	2.21458e-06	-0.396287	0.766	0.878
ASRGL1	3.81921e-08	0.314989	0.282	0.12	0.000790462	1.20332	0.607979		MMP14	1.45665e-20	0.818276	0.897	0.698	3.01482e-16	11.8637	4.67533											ADARB1	1.17569e-15	-0.674806	0.015	0.197	2.43333e-11	0.0690303	1.0992		EGR1	2.92858e-08	0.270329	0.778	0.619	0.000606127	11.3489	8.42383		WFDC21P	3.12575e-07	-0.815881	0.19	0.47
ATF3	5.00376e-08	0.283479	0.231	0.088	0.00103563	0.860631	0.401351		MMP7	2.45627e-08	0.360349	0.287	0.094	0.000508374	0.974743	0.377251											ADD3	9.51017e-07	-0.25669	0.141	0.354	0.0196832	1.58627	2.34313		FKBP5	2.79587e-11	0.681046	0.422	0.229	5.78661e-07	3.48769	1.27116
ATF6	4.9135e-09	0.322535	0.377	0.19	0.000101695	1.6443	0.915293		MXRA8	1.78293e-12	0.73558	0.701	0.467	3.69012e-08	4.33192	1.5552											ADRA2C	7.34202e-07	-0.261901	0.086	0.26	0.0151958	1.06238	1.67986		FOS	7.63978e-14	0.388506	0.814	0.691	1.58121e-09	16.2439	10.6926
BOC	1.06407e-07	0.27727	0.109	0.016	0.0022023	0.392227	0.0550995		PAM	3.8335e-08	0.447296	0.805	0.62	0.00079342	5.6998	3.28355											AGFG1	7.69153e-07	-0.397258	0.047	0.181	0.0159192	0.381008	1.05458		FOSB	2.18812e-14	0.580898	0.571	0.347	4.52875e-10	5.44589	2.6058
CACNA2D1	1.44629e-07	0.268233	0.159	0.045	0.00299338	0.460686	0.11703		PRKAR2B	2.38714e-12	0.739744	0.517	0.209	4.94066e-08	2.73683	0.783347											AL390728.4	1.34308e-06	-0.355915	0.015	0.102	0.0277976	0.0856326	0.549725		GABRP	2.62211e-15	0.512317	0.766	0.589	5.42699e-11	14.0146	7.99534
CALM2	1.07442e-15	0.364321	0.885	0.666	2.22373e-11	14.9342	10.069		PRL	1.91772e-08	0.470855	0.793	0.502	0.000396911	5.52936	3.07738											APCDD1	1.07059e-11	-0.642735	0.116	0.378	2.21579e-07	1.09054	2.97553		GADD45B	2.48092e-07	0.385732	0.573	0.434	0.00513475	6.06669	3.80501
CAP1	5.87154e-08	0.309108	0.563	0.377	0.00121523	2.81914	1.80364		PRLR	1.47675e-08	0.438397	0.908	0.73	0.000305643	10.1574	6.19732											APMAP	1.36588e-10	-0.287865	0.045	0.228	2.82696e-06	0.45601	0.941702		IER2	2.30317e-12	0.408618	0.749	0.587	4.76686e-08	8.78109	5.5002
CAPRIN1	9.09692e-09	0.27635	0.326	0.152	0.000188279	1.27438	0.725221		PRR16	4.12425e-09	0.292118	0.126	0.018	8.53596e-05	0.38669	0.0354141											APOD	8.48953e-11	-0.586763	0.094	0.331	1.75708e-06	1.05997	2.70416		IL20RA	2.85537e-08	0.370158	0.243	0.107	0.000590977	0.912393	0.320747
CARS1	6.69889e-07	0.251758	0.313	0.158	0.0138647	1.03954	0.585604		PRXL2A	2.05232e-06	0.375162	0.954	0.812	0.0424769	12.9147	8.56188											APTX	1.79276e-07	-0.328659	0.032	0.157	0.00371048	0.399115	0.943517		JUN	1.05174e-14	0.478533	0.824	0.661	2.17679e-10	17.1811	10.2667
CBLB	1.55571e-07	0.255466	0.361	0.182	0.00321986	1.12331	0.644624		RAB31	2.33189e-08	0.398233	0.793	0.605	0.000482631	5.31768	3.24236											ARFGAP1	3.14714e-08	-0.426969	0.069	0.244	0.000651363	0.726358	1.64583		LIMS1	2.24683e-06	0.291426	0.643	0.524	0.0465026	5.46076	3.82746
CCT6A	1.9632e-09	0.318373	0.511	0.297	4.06323e-05	2.3347	1.42543		S1PR3	2.12637e-08	0.676449	0.563	0.319	0.000440094	3.38178	1.22778											ATP6V1H	1.48256e-06	-0.313456	0.03	0.142	0.0306846	0.314337	0.798205		MGST1	8.88335e-09	0.366046	0.778	0.661	0.000183859	15.594	10.5074
CD99	3.30531e-11	0.271566	0.701	0.487	6.84101e-07	5.64999	4.06852		SEC11A	2.2842e-06	0.42692	0.713	0.537	0.047276	3.6925	2.06193											BAG1	3.97343e-09	-0.412771	0.107	0.339	8.22381e-05	1.42409	2.6628		MMP7	1.68434e-09	0.995338	0.578	0.398	3.48608e-05	15.41	5.06512
CDC25B	5.00465e-09	0.379372	0.386	0.193	0.000103581	1.50356	0.713164		SPTSSA	7.7964e-07	0.346055	0.92	0.844	0.0161362	17.1086	11.8113											BASP1	5.04005e-07	-0.258049	0.131	0.339	0.0104314	1.57062	2.32742		MTHFD2	1.61305e-07	0.448811	0.395	0.253	0.00333853	2.15552	1.01444
CDH11	4.53635e-13	0.315391	0.907	0.821	9.38889e-09	29.6919	21.3898		THSD7A	8.44414e-07	0.461657	0.632	0.426	0.0174768	3.38797	1.76547											BTBD3	2.01347e-15	-0.713506	0.079	0.362	4.16728e-11	0.800277	2.67461		MYL12A	3.0249e-07	0.282362	0.814	0.745	0.00626064	11.7552	8.61742
CDK2AP1	1.06748e-14	0.307056	0.524	0.267	2.20936e-10	2.37267	1.48097																				C11orf96	3.32534e-13	-0.40621	0.075	0.331	6.88246e-09	0.76642	1.6516		NCL	3.03659e-08	0.282378	0.839	0.737	0.000628482	12.9523	9.5199
CDKN2B	6.12407e-07	0.298236	0.186	0.067	0.012675	0.651285	0.225462																				C1QTNF1	8.63858e-10	-0.31559	0.019	0.15	1.78793e-05	0.0678529	0.464099		NPTX2	2.0786e-06	0.29589	0.118	0.036	0.0430209	0.489079	0.10768
CENPW	3.20287e-12	0.589615	0.285	0.096	6.62898e-08	1.56377	0.421716																				C1R	1.13444e-11	-0.852339	0.158	0.441	2.34794e-07	1.95654	5.93347		PHGDH	9.78301e-09	0.458373	0.217	0.084	0.000202479	1.00117	0.265362
CERS6	8.50296e-08	0.296131	0.2	0.07	0.00175986	0.738065	0.292581																				C1S	3.35403e-11	-0.754674	0.169	0.465	6.94184e-07	1.9211	5.21295		PPP1R15A	4.45171e-10	0.423965	0.706	0.564	9.21371e-06	9.07476	5.59339
CFL1	6.59034e-13	0.268382	0.643	0.393	1.364e-08	3.85283	2.71055																				CALD1	4.71435e-08	-0.726856	0.484	0.685	0.000975729	17.69	37.6614		PSAT1	3.63656e-10	0.539439	0.386	0.219	7.5266e-06	2.49322	1.03681
CHST2	1.47489e-10	0.318762	0.619	0.366	3.05258e-06	4.35911	2.89633																				CARS2	2.99312e-07	-0.267767	0.03	0.15	0.00619486	0.293602	0.690792		ROCK2	1.48289e-06	0.412355	0.465	0.331	0.0306913	3.04063	1.67526
CHST3	1.85488e-10	0.330955	0.328	0.139	3.83904e-06	1.20625	0.584615																				CCL8	7.55542e-07	-0.631476	0.096	0.268	0.0156374	1.03596	2.82838		SLC26A2	2.47702e-07	0.291252	0.766	0.598	0.0051267	25.5355	18.8307
CILP	3.98895e-12	0.342304	0.322	0.115	8.25594e-08	1.27473	0.615357																				CD248	4.67269e-14	-0.616609	0.064	0.315	9.67107e-10	0.502434	1.78346		SLC39A14	2.18556e-08	0.67447	0.477	0.333	0.000452346	6.00811	2.57012
CLTB	3.83404e-11	0.398579	0.278	0.094	7.93531e-07	0.898953	0.274717																				CD59	3.9225e-08	-0.251669	0.173	0.433	0.00081184	2.22128	3.14311		SLC4A7	7.94272e-07	0.709408	0.496	0.366	0.016439	5.65217	2.27244
COL14A1	1.24924e-13	0.390486	0.866	0.714	2.58555e-09	28.4284	18.915																				CD81	2.32926e-09	-0.541831	0.139	0.394	4.82087e-05	1.55317	3.3893		TCIM	4.44975e-20	0.728934	0.677	0.429	9.20964e-16	7.81039	3.25034
COL24A1	2.03854e-15	0.34798	0.307	0.08	4.21918e-11	1.16962	0.531994																				CDH11	5.19452e-07	-0.650065	0.253	0.465	0.0107511	4.12304	8.81404		TNFAIP3	2.62929e-07	0.402677	0.414	0.259	0.00544185	2.64544	1.43707
COL4A5	4.84581e-12	0.26412	0.497	0.259	1.00294e-07	2.64665	1.8002																				CDKN1C	4.73144e-08	-0.430252	0.086	0.276	0.000979266	0.974908	2.03671		TNFSF10	6.72388e-07	0.581319	0.292	0.164	0.0139164	2.36209	0.879948
COPS6	5.47431e-08	0.258128	0.447	0.249	0.00113302	1.62998	1.03165																				CHRDL1	6.52668e-14	-0.703749	0.056	0.291	1.35083e-09	0.55105	2.13516		ZFP36	2.00891e-11	0.415516	0.66	0.469	4.15784e-07	5.91192	3.56186
CORO2A	5.49134e-12	0.294054	0.449	0.219	1.13654e-07	2.17301	1.36465																				CHST2	5.39881e-11	-0.411302	0.075	0.299	1.11739e-06	0.671468	1.52188		ANKRD37	2.36308e-06	-0.577705	0.055	0.149	0.0489088	0.158765	1.06485
CP	4.5488e-07	0.350605	0.375	0.211	0.00941466	2.04485	1.14437																				CHSY1	1.21142e-08	-0.453708	0.128	0.354	0.000250727	1.2374	2.52198		BAG1	1.11494e-07	-0.504475	0.383	0.514	0.00230759	1.97238	3.9226
CRISPLD2	3.68939e-15	0.423236	0.816	0.652	7.63593e-11	10.8388	6.75349																				CNPY2	1.37618e-09	-0.306358	0.079	0.291	2.84828e-05	0.909167	1.59354		CA12	2.28752e-11	-0.547609	0.571	0.701	4.73448e-07	5.47315	10.1928
CTSC	1.6669e-09	0.251959	0.346	0.158	3.44999e-05	1.45485	0.908098																				COG6	6.36946e-08	-0.424278	0.024	0.142	0.00131829	0.207218	0.845216		CD55	1.84933e-18	-0.691905	0.829	0.895	3.82757e-14	16.367	33.691
CTSO	1.25056e-09	0.286522	0.371	0.174	2.58828e-05	1.24977	0.689289																				COL14A1	4.08132e-08	-0.716837	0.227	0.465	0.000844711	4.06319	9.36914		CSTB	4.84801e-07	-0.633651	0.61	0.688	0.0100339	5.36059	10.9864
DCBLD1	5.24097e-12	0.389538	0.619	0.39	1.08472e-07	3.75972	2.22409																				COL15A1	2.03416e-10	-0.315438	0.054	0.244	4.21011e-06	0.430727	0.961326		EFHD2	4.1959e-08	-0.837132	0.306	0.438	0.000868425	1.69794	5.23152
DCBLD2	1.03912e-10	0.309212	0.367	0.163	2.15067e-06	1.50099	0.835788																				COL1A1	8.50343e-07	-0.623028	0.253	0.465	0.0175996	3.7976	7.94544		ENTPD3	1.50486e-11	-0.613413	0.08	0.246	3.11462e-07	0.370723	1.53135
DDHD1	1.10803e-11	0.346751	0.299	0.104	2.29329e-07	1.07349	0.465916																				COL3A1	9.40197e-07	-0.966937	0.345	0.52	0.0194593	7.85769	22.2946		EZR	1.71364e-11	-0.496915	0.783	0.853	3.54672e-07	10.4395	17.8025
DDIT4	4.24567e-15	0.594092	0.674	0.447	8.78725e-11	8.825	4.42402																				COL4A5	7.97359e-10	-0.258242	0.066	0.268	1.65029e-05	0.600355	1.0719		F3	1.04654e-12	-0.737259	0.304	0.501	2.16603e-08	2.12652	5.53505
DDX5	1.08884e-12	0.265695	0.864	0.658	2.25358e-08	11.8126	8.82304																				COL5A1	2.51898e-09	-0.568724	0.173	0.433	5.21353e-05	2.14307	4.5507		GPRC5A	1.96501e-07	-0.621392	0.217	0.36	0.00406697	1.36793	3.40794
DUSP6	1.57135e-06	0.27884	0.128	0.035	0.0325221	0.467748	0.110588																				COL5A2	2.00798e-10	-0.382368	0.09	0.323	4.15591e-06	0.796136	1.63269		HILPDA	2.39711e-06	-0.758153	0.217	0.339	0.049613	1.13945	3.56628
EDNRB	2.33836e-39	0.978428	0.695	0.283	4.8397e-35	5.93122	1.60545																				COL6A3	6.88409e-07	-0.481785	0.18	0.409	0.014248	2.18876	4.16248		HSPB8	1.60524e-06	-0.285626	0.077	0.187	0.0332236	0.338948	0.781597
EID1	8.34169e-12	0.311468	0.771	0.529	1.72648e-07	6.9811	4.84513																				COLEC11	5.72357e-13	-0.397099	0.021	0.189	1.18461e-08	0.0915264	0.623649		LINC01480	9.56893e-10	-0.564735	0.099	0.253	1.98048e-05	0.735985	2.05356
EIF2S2	2.84612e-10	0.268418	0.555	0.34	5.89061e-06	2.63504	1.77931																				COPA	1.42396e-06	-0.352643	0.113	0.299	0.0294717	1.34534	2.33701		MAFK	7.96233e-10	-0.532676	0.118	0.276	1.64796e-05	0.327862	1.26199
EMILIN1	4.44865e-09	0.364169	0.41	0.217	9.20736e-05	1.60125	0.80728																				COX7A1	1.79078e-12	-0.350901	0.051	0.268	3.70638e-08	0.411538	1.00487		MSLN	1.29184e-08	-0.439733	0.511	0.634	0.000267372	3.31713	5.70145
EPB41L1	9.19803e-07	0.262733	0.165	0.056	0.0190372	0.521039	0.169599																				CPXM1	1.74582e-14	-0.314403	0.026	0.22	3.61333e-10	0.1675	0.598823		MT-CO2	9.76101e-07	-0.280213	0.843	0.855	0.0202024	17.3095	23.2311
EPRS1	1.76611e-14	0.332449	0.561	0.289	3.65531e-10	3.26634	2.05967																				CREBRF	2.21763e-06	-0.58984	0.069	0.213	0.0458983	0.725888	2.11298		NDRG1	3.16406e-11	-0.601742	0.684	0.771	6.54866e-07	11.48	21.7798
ERCC6L2	4.66578e-10	0.270347	0.241	0.078	9.65677e-06	0.733768	0.323064																				CST3	9.91746e-11	-0.314666	0.096	0.346	2.05262e-06	1.26223	2.0988		PAEP	1.04679e-26	-1.17376	0.439	0.735	2.16654e-22	12.0399	41.1727
ERGIC2	5.25517e-08	0.333135	0.33	0.16	0.00108766	1.23248	0.599961																				CTSA	3.52652e-10	-0.278792	0.09	0.323	7.29885e-06	0.987208	1.62616		PCCA	4.7821e-10	-0.634599	0.376	0.543	9.89751e-06	2.15956	4.95977
EXOC5	2.12991e-06	0.311764	0.332	0.187	0.0440828	1.23843	0.638877																				CXCL14	6.74093e-18	-1.02114	0.094	0.409	1.39517e-13	1.02757	4.62927		PDGFA	3.79699e-07	-0.645789	0.116	0.24	0.00785862	0.41448	1.69811
FAM89A	3.9815e-11	0.321457	0.429	0.214	8.2405e-07	2.1274	1.26765																				CYB5B	3.12146e-12	-0.612865	0.126	0.409	6.46049e-08	1.23326	3.12195		RIMKLB	4.14841e-21	-0.906598	0.52	0.752	8.58597e-17	6.423	17.3785
FEZ2	4.3163e-11	0.326282	0.367	0.16	8.93345e-07	1.32761	0.679605																				DAZAP2	1.53228e-06	-0.330179	0.081	0.244	0.0317136	0.700085	1.36519		RNASET2	4.46947e-08	-0.299202	0.843	0.863	0.000925046	19.35	26.4477
FKBP5	1.40452e-11	0.471786	0.353	0.15	2.90694e-07	1.61135	0.629186																				DBI	3.90919e-09	-0.347172	0.094	0.315	8.09085e-05	1.04613	1.8954		S100P	1.37421e-09	-0.993943	0.328	0.501	2.84421e-05	3.99271	12.4896
FN1	1.43292e-17	0.434745	0.518	0.219	2.96572e-13	2.74364	1.42374																				DDX54	4.27013e-07	-0.252501	0.051	0.197	0.00883788	0.886156	1.42794		SEMA3B	1.23302e-10	-0.758126	0.253	0.434	2.55198e-06	1.35425	4.02462
FOS	2.91727e-22	0.473686	0.862	0.612	6.03788e-18	13.3763	7.95214																				DEFB1	3.29304e-08	-0.355328	0.071	0.252	0.000681561	0.917206	1.73518		SFN	3.18335e-10	-0.796293	0.246	0.423	6.58858e-06	1.24625	3.98062
FOSB	3.71411e-15	0.470688	0.588	0.307	7.68709e-11	4.17585	2.23269																				EBLN3P	1.19811e-07	-0.287234	0.079	0.26	0.00247973	0.819994	1.42557		SLC7A2	9.02731e-14	-0.547165	0.634	0.766	1.86838e-09	7.4019	13.5214
GALNT1	5.55881e-12	0.380497	0.412	0.184	1.15051e-07	1.73112	0.866783																				EDEM3	7.11205e-08	-0.323889	0.062	0.228	0.00147198	0.548691	1.14106		WFDC2	8.14557e-08	-0.411236	0.713	0.777	0.00168589	7.54494	11.8916
GARS1	2.17612e-11	0.423685	0.538	0.302	4.50391e-07	2.93465	1.57574																				ELOVL5	3.11905e-18	-1.04564	0.086	0.394	6.4555e-14	0.723734	3.90442		WFDC21P	9.394e-09	-0.564969	0.019	0.118	0.000194428	0.0433376	0.835642
GBP1	9.26389e-14	0.382445	0.342	0.115	1.91735e-09	1.65996	0.814602																				EMILIN1	1.71789e-11	-0.315913	0.024	0.181	3.55552e-07	0.134309	0.555717
GCLM	7.94605e-07	0.278218	0.14	0.04	0.0164459	0.435482	0.0868489																				EMILIN2	5.58986e-16	-0.453241	0.06	0.331	1.15693e-11	0.573783	1.4762
GHITM	1.81168e-08	0.316343	0.449	0.246	0.000374963	2.06358	1.23277																				ENTPD3	5.49727e-10	-0.405892	0.006	0.11	1.13777e-05	0.0342664	0.552062
GLUL	5.91223e-16	0.49883	0.555	0.281	1.22365e-11	3.73209	1.87352																				EP400	5.93142e-08	-0.307876	0.054	0.213	0.00122763	0.463049	0.990526
GNB1	1.85907e-08	0.250367	0.709	0.5	0.000384772	4.43896	3.23431																				ERLEC1	1.00648e-06	-0.30106	0.137	0.346	0.0208312	1.46669	2.33321
GPNMB	1.11556e-13	0.49588	0.67	0.43	2.30886e-09	5.61958	3.03156																				ETAA1	9.18208e-09	-0.436404	0.032	0.173	0.000190042	0.220026	0.887543
GSN	3.36306e-08	0.332867	0.513	0.31	0.000696053	2.39657	1.43488																				EVL	2.38932e-08	-0.268087	0.058	0.228	0.000494518	0.549361	1.02573
HAND2	6.39893e-11	0.264799	0.781	0.54	1.32439e-06	10.1688	7.57048																				EXT2	2.59777e-07	-0.268763	0.043	0.181	0.0053766	0.290583	0.688528
HAND2-AS1	2.94382e-12	0.30904	0.629	0.377	6.09283e-08	4.19836	2.81638																				EXTL2	5.00039e-10	-0.314506	0.009	0.118	1.03493e-05	0.0376677	0.421171
HDAC2	2.64082e-11	0.320369	0.433	0.209	5.46571e-07	1.72256	0.976252																				FADS1	1.81114e-08	-0.548059	0.146	0.394	0.000374851	1.67675	3.63049
HDGFL3	2.97894e-09	0.279845	0.299	0.126	6.16552e-05	0.994325	0.507511																				FADS2	2.50457e-09	-0.276066	0.09	0.307	5.18372e-05	0.978174	1.60711
HERPUD1	1.49797e-08	0.264721	0.439	0.249	0.000310035	1.66773	1.04727																				FAM110C	2.11917e-06	-0.372959	0.133	0.331	0.0438605	1.39774	2.48158
HIF1A	2.70592e-08	0.268182	0.689	0.5	0.000560045	5.2805	3.80313																				FAM114A1	5.30877e-08	-0.266404	0.146	0.386	0.00109876	1.91212	2.80109
HSP90AA1	8.50666e-12	0.285479	0.882	0.682	1.76062e-07	11.4374	8.34859																				FAM155A	3.17546e-12	-0.318083	0.092	0.362	6.57224e-08	1.11799	1.91116
HSPB6	4.61124e-08	0.279858	0.493	0.294	0.000954389	2.23197	1.44302																				FBLN5	7.61404e-10	-0.326153	0.081	0.299	1.57588e-05	0.722389	1.38659
HTRA1	2.64929e-11	0.339103	0.27	0.086	5.48324e-07	0.933217	0.377241																				FBN1	1.46978e-08	-0.286547	0.079	0.276	0.0003042	0.751306	1.33243
HYAL2	6.24279e-09	0.273867	0.175	0.045	0.000129207	0.469467	0.117431																				FEM1B	5.1631e-07	-0.332869	0.039	0.165	0.0106861	0.315326	0.834833
IBTK	2.29258e-09	0.295959	0.365	0.174	4.74495e-05	1.36137	0.756428																				FERMT2	5.93099e-09	-0.254663	0.094	0.315	0.000122754	1.16852	1.79745
IER2	1.10735e-14	0.345552	0.779	0.505	2.29189e-10	7.00974	4.66953																				FHL1	4.04215e-10	-0.439215	0.015	0.142	8.36605e-06	0.114407	0.72899
IL1B	5.87695e-11	0.489225	0.54	0.302	1.21635e-06	6.01345	3.29995																				FILIP1L	9.27898e-13	-0.623851	0.062	0.291	1.92047e-08	0.606133	1.99721
IRF1	2.22294e-10	0.272508	0.276	0.099	4.60082e-06	0.917097	0.459807																				FKBP10	2.36154e-10	-0.386288	0.073	0.283	4.88768e-06	0.580046	1.32505
ITGA1	3.08773e-22	0.480338	0.738	0.433	6.39068e-18	6.91922	3.89863																				FOXO1	1.5188e-10	-0.304401	0.103	0.354	3.14347e-06	1.06867	1.80472
ITGB5	4.25539e-10	0.346925	0.348	0.152	8.80737e-06	1.17794	0.539492																				FSTL1	1.38607e-12	-0.531036	0.101	0.37	2.86875e-08	0.982729	2.37201
ITGB8	5.23374e-09	0.28038	0.592	0.374	0.000108323	4.1154	2.86466																				FUBP1	9.28845e-09	-0.406483	0.079	0.276	0.000192243	1.07392	2.11405
ITPR1	9.06558e-09	0.318082	0.21	0.067	0.00018763	0.676953	0.220055																				GADD45A	1.64293e-06	-0.486129	0.167	0.37	0.0340036	2.14875	4.11989
JUN	2.26434e-17	0.345924	0.942	0.773	4.68651e-13	24.4406	17.0009																				GALNT13	7.67924e-11	-0.30559	0.034	0.205	1.58937e-06	0.201566	0.631036
KIF21A	1.09458e-09	0.347136	0.324	0.142	2.26545e-05	1.18916	0.5471																				GANAB	2.77201e-07	-0.273942	0.081	0.26	0.00573722	0.877417	1.46906
KIF26B	5.97131e-11	0.327308	0.223	0.059	1.23588e-06	0.635422	0.178912																				GAS1	4.96473e-17	-0.610447	0.028	0.252	1.02755e-12	0.230513	1.26569
KIF2A	1.64313e-07	0.309682	0.223	0.088	0.00340079	0.786257	0.310542																				GBP1	4.51972e-09	-0.255985	0.043	0.205	9.35447e-05	0.348034	0.7413
KIF3A	8.73799e-08	0.276856	0.184	0.059	0.0018085	0.539775	0.167401																				HAND2	3.12761e-08	-0.448078	0.148	0.386	0.000647321	1.65814	3.1608
KIF5B	1.22787e-11	0.342415	0.709	0.463	2.54132e-07	5.24281	3.43273																				HLA-F	3.30513e-13	-0.698577	0.051	0.276	6.84063e-09	0.52051	2.05758
KRCC1	1.78808e-10	0.342408	0.276	0.096	3.70079e-06	0.894367	0.345112																				HPCAL1	2.71618e-07	-0.429158	0.041	0.173	0.00562169	0.336267	1.05246
LAMB1	2.51838e-15	0.382539	0.893	0.698	5.21228e-11	16.361	10.8424																				HSPB6	6.19703e-16	-0.402447	0.026	0.236	1.2826e-11	0.22039	0.825068
LARS1	1.86367e-10	0.254905	0.414	0.201	3.85723e-06	1.58601	1.00413																				ID4	4.99286e-12	-0.444831	0.021	0.181	1.03337e-07	0.12128	0.74945
LHFPL6	3.69448e-11	0.314893	0.548	0.329	7.64646e-07	3.0232	1.9364																				IER5	1.02234e-10	-0.51547	0.024	0.173	2.11595e-06	0.234498	1.06707
LINC02126	2.35624e-10	0.395267	0.186	0.043	4.8767e-06	0.727644	0.163569																				IFI27L2	1.96371e-10	-0.428707	0.036	0.205	4.06428e-06	0.347583	1.06891
LMO4	4.00562e-20	0.528822	0.66	0.358	8.29042e-16	4.39302	2.1781																				IFI6	1.38155e-07	-0.337232	0.096	0.291	0.0028594	1.08885	1.92661
LRRC8A	3.76033e-07	0.277645	0.487	0.31	0.00778276	2.40426	1.57895																				IGFBP2	1.76003e-07	-0.528714	0.246	0.488	0.00364274	3.32785	6.34328
LUM	1.08429e-15	0.316326	0.961	0.866	2.24416e-11	45.4133	32.827																				IGFBP4	1.26159e-06	-0.403077	0.366	0.63	0.0261111	7.09024	11.1064
MAF	8.25353e-08	0.410662	0.427	0.249	0.00170823	2.25148	1.15642																				IL15	3.78223e-13	-0.336926	0.064	0.307	7.82808e-09	0.498558	1.09893
MAGI3	1.31974e-14	0.344585	0.485	0.214	2.73146e-10	2.55841	1.52119																				IMPACT	1.3722e-07	-0.450589	0.032	0.157	0.00284005	0.230166	0.930422
MAMDC2	2.47034e-11	0.383136	0.365	0.155	5.11286e-07	1.79126	0.902855																				INAFM1	9.23225e-14	-0.356366	0.026	0.213	1.9108e-09	0.132455	0.617293
MAOB	4.28216e-16	0.465125	0.586	0.313	8.86278e-12	3.6956	1.9491																				ING1	1.44121e-06	-0.386461	0.131	0.331	0.0298287	1.29645	2.37983
MARS1	1.63037e-13	0.314709	0.309	0.094	3.37439e-09	0.941549	0.417333																				ISG20	4.70744e-07	-0.34283	0.054	0.197	0.00974298	0.690513	1.38181
MATN2	4.23956e-13	0.467747	0.346	0.136	8.77462e-09	1.49123	0.560535																				ITSN1	3.41823e-08	-0.395234	0.137	0.37	0.000707471	1.60231	2.86373
MCL1	6.30768e-08	0.274615	0.763	0.607	0.0013055	7.42965	5.4054																				JMJD8	5.447e-08	-0.29307	0.015	0.118	0.00112737	0.124099	0.506896
MDK	7.15213e-17	0.345369	0.61	0.307	1.48028e-12	3.95874	2.51059																				KCNAB3	6.31989e-11	-0.32425	0.015	0.15	1.30803e-06	0.0450445	0.445289
ME1	1.10927e-08	0.268001	0.214	0.072	0.000229587	0.759159	0.345593																				KCNK3	3.11782e-13	-0.501603	0.051	0.276	6.45296e-09	0.351774	1.23227
MEDAG	9.30008e-08	0.273033	0.419	0.235	0.00192484	2.49558	1.66037																				KDM5B	1.4996e-06	-0.2593	0.146	0.354	0.0310372	1.42878	2.14775
MEIS1	3.68066e-10	0.300385	0.639	0.439	7.61786e-06	4.1396	2.80604																				KIAA1191	9.17296e-07	-0.251268	0.088	0.26	0.0189853	0.88078	1.41803
MFSD1	9.60844e-07	0.260341	0.219	0.091	0.0198866	0.838978	0.417464																				KIAA1522	3.52913e-07	-0.267505	0.12	0.323	0.00730425	1.39023	2.12332
MGST1	1.85514e-10	0.315875	0.839	0.663	3.83959e-06	11.5046	8.11777																				KLF9	5.72099e-08	-0.433788	0.058	0.22	0.00118407	0.449235	1.2363
MLLT11	3.10856e-11	0.29913	0.27	0.088	6.43379e-07	0.806607	0.339532																				KLHDC10	1.03428e-07	-0.293619	0.034	0.165	0.00214066	0.311824	0.759514
MMP14	1.97049e-21	0.491888	0.905	0.695	4.07832e-17	15.7885	9.26566																				LAMA2	1.32213e-07	-0.284392	0.06	0.22	0.00273641	0.429115	0.899227
MMP7	5.13044e-16	0.576523	0.297	0.072	1.06185e-11	1.50443	0.40711																				LAMA4	3.12998e-07	-0.427066	0.092	0.268	0.00647812	0.923299	1.94794
MRFAP1	3.68362e-08	0.294371	0.633	0.436	0.000762398	3.8989	2.64968																				LCP1	8.54482e-10	-0.536379	0.058	0.244	1.76852e-05	0.499135	1.56323
MTHFD2	7.26178e-12	0.451887	0.462	0.23	1.50297e-07	2.3002	1.10033																				LDLR	2.0145e-09	-0.483187	0.178	0.457	4.16942e-05	2.01417	3.88668
MTPN	1.45243e-09	0.308951	0.522	0.305	3.00609e-05	2.4493	1.53253																				LHFPL6	1.97129e-06	-0.348134	0.047	0.173	0.0407997	0.288139	0.824548
MTR	1.27231e-16	0.505172	0.619	0.353	2.6333e-12	3.70232	1.83739																				LINC01320	1.07584e-06	-0.349106	0.238	0.504	0.0222666	3.80918	5.81845
MXRA8	5.45013e-29	0.681367	0.682	0.334	1.12801e-24	4.53984	1.80274																				LINC01502	1.42802e-09	-0.600918	0.026	0.165	2.95557e-05	0.271569	1.31908
MYL12A	8.60023e-19	0.456867	0.761	0.471	1.77999e-14	6.21491	3.56894																				LINC01541	2.96727e-12	-0.877053	0.227	0.543	6.14136e-08	3.04331	8.71934
MYL12B	6.50567e-10	0.310581	0.738	0.537	1.34648e-05	5.94243	4.08895																				LMNA	7.12014e-07	-0.301382	0.154	0.378	0.0147366	1.68002	2.62265
NDN	1.68149e-11	0.273243	0.361	0.147	3.48019e-07	1.28781	0.740815																				LRRC41	8.02825e-07	-0.409106	0.06	0.205	0.0166161	0.646129	1.4782
NDP	8.84718e-24	0.660279	0.384	0.086	1.8311e-19	1.7864	0.439756																				MAGED1	1.37081e-08	-0.318739	0.113	0.339	0.000283717	1.24345	2.08562
NFE2L1	6.79199e-09	0.276545	0.637	0.414	0.000140574	3.54529	2.44715																				MAGED2	4.29136e-10	-0.313382	0.069	0.276	8.88182e-06	0.579423	1.16072
NID2	4.22759e-20	0.486057	0.67	0.364	8.74984e-16	5.27227	2.85774																				MAGI3	5.53732e-09	-0.337697	0.069	0.26	0.000114606	0.685731	1.36292
NPC2	1.15495e-24	0.602378	0.87	0.647	2.39039e-20	15.9012	8.25351																				MAP1B	1.71032e-08	-0.392178	0.141	0.386	0.000353985	1.56688	2.7995
NQO1	3.31385e-08	0.3243	0.28	0.126	0.000685868	0.864757	0.348281																				MAP7D3	5.50846e-09	-0.364688	0.034	0.181	0.000114009	0.385717	0.99552
NSD1	1.17744e-09	0.311969	0.351	0.152	2.43695e-05	1.32208	0.699769																				MAPK6	1.41058e-08	-0.278995	0.032	0.173	0.000291947	0.392255	0.840285
NSG1	1.17481e-10	0.539838	0.181	0.037	2.43151e-06	1.15662	0.25697																				MARCKS	3.45241e-10	-0.31182	0.111	0.362	7.14545e-06	1.33246	2.18593
OCIAD1	1.98011e-08	0.277601	0.61	0.396	0.000409824	3.60975	2.49234																				MBD4	4.11248e-08	-0.358492	0.064	0.236	0.00085116	0.622685	1.32234
PBRM1	4.21218e-10	0.259709	0.363	0.163	8.71795e-06	1.18579	0.685846																				MDN1	1.30183e-07	-0.270245	0.045	0.189	0.0026944	0.576589	1.06578
PBX1	1.42481e-20	0.582963	0.493	0.176	2.94893e-16	2.17593	0.772935																				MEDAG	4.57237e-18	-0.59396	0.03	0.268	9.46342e-14	0.202269	1.17749
PDGFRB	2.57104e-13	0.373205	0.792	0.548	5.32127e-09	7.09779	4.57552																				MEG3	3.42507e-07	-0.396476	0.171	0.409	0.00708887	3.55823	5.77616
PHGDH	6.49159e-12	0.350417	0.243	0.067	1.34356e-07	0.767962	0.245343																				MFAP4	5.91394e-09	-0.43958	0.128	0.37	0.000122401	1.69124	3.17695
PICALM	2.94663e-07	0.301163	0.433	0.259	0.00609863	1.82787	1.0925																				MGP	2.04303e-12	-0.331448	0.015	0.165	4.22845e-08	0.11962	0.559613
PIK3R1	5.73061e-11	0.25773	0.579	0.337	1.18607e-06	5.01174	3.6459																				MICU2	1.11644e-07	-0.451349	0.034	0.165	0.00231069	0.260916	0.980178
PKD2	1.18042e-10	0.354488	0.344	0.15	2.44312e-06	1.27882	0.598664																				MORF4L2	1.14854e-06	-0.306819	0.246	0.504	0.0237714	3.50886	5.12797
PLAT	4.29622e-08	0.294822	0.365	0.19	0.000889188	1.72869	1.03195																				MRC2	1.32384e-11	-0.345036	0.06	0.276	2.73994e-07	0.649951	1.3298
PLAU	2.89477e-13	0.539781	0.487	0.249	5.9913e-09	2.45976	1.01661																				MTLN	2.04719e-06	-0.70955	0.077	0.228	0.0423706	0.913488	2.89027
PLPP3	2.20566e-16	0.636338	0.697	0.422	4.56506e-12	8.04687	3.78784																				MYL9	1.80633e-09	-0.284374	0.034	0.189	3.73856e-05	0.234686	0.64081
PLPPR4	1.23056e-06	0.323923	0.225	0.099	0.025469	0.775998	0.28459																				MZT2B	5.58062e-10	-0.300744	0.032	0.189	1.15502e-05	0.415035	0.911518
PON2	1.69122e-10	0.256212	0.416	0.209	3.50033e-06	1.47958	0.919141																				NAGK	5.88096e-08	-0.320333	0.03	0.157	0.00121718	0.193543	0.644209
PPIC	5.06608e-08	0.258912	0.375	0.198	0.00104853	1.25613	0.741488																				NAPG	2.66363e-08	-0.304982	0.071	0.252	0.000551291	0.620224	1.198
PPM1H	1.31929e-09	0.253476	0.13	0.016	2.73053e-05	0.424702	0.105709																				NFE2L1	1.20284e-07	-0.266724	0.165	0.417	0.00248953	1.98435	2.8966
PPP1R15A	1.95139e-12	0.382363	0.736	0.497	4.03879e-08	6.92607	4.40754																				NID1	1.1554e-06	-0.391979	0.206	0.449	0.0239133	2.74889	4.54801
PPP1R7	1.01678e-08	0.275006	0.361	0.176	0.000210442	1.22422	0.689443																				NID2	2.54464e-11	-0.475558	0.077	0.307	5.26664e-07	0.675291	1.6954
PPP2CB	1.42896e-06	0.263909	0.34	0.19	0.0295751	1.19231	0.683788																				NME4	1.95819e-07	-0.332814	0.066	0.228	0.00405287	0.498075	1.08965
PPT1	1.89491e-11	0.26049	0.419	0.195	3.92189e-07	1.41855	0.863911																				NPR1	1.05708e-09	-0.350263	0.047	0.22	2.18783e-05	0.298602	0.843289
PRKAR2B	3.86652e-12	0.274716	0.229	0.053	8.00254e-08	0.762244	0.338932																				NUCB2	2.05548e-06	-0.320686	0.182	0.402	0.0425423	2.19954	3.4092
PRL	4.28081e-08	0.292514	0.421	0.227	0.000885999	2.40759	1.54337																				OLFML3	2.55794e-21	-0.511092	0.019	0.268	5.29418e-17	0.0901803	0.817452
PRLR	2.57917e-34	0.85451	0.757	0.404	5.33811e-30	10.1878	3.7603																				ORMDL1	2.84852e-08	-0.270302	0.075	0.26	0.000589558	0.641058	1.15038
PRSS23	4.41548e-10	0.283848	0.46	0.249	9.13872e-06	2.33856	1.51354																				OSR2	2.4629e-12	-0.30436	0.009	0.142	5.09747e-08	0.0437668	0.415095
PRXL2A	5.26793e-18	0.417727	0.852	0.668	1.0903e-13	13.9284	8.83099																				P3H1	3.75039e-15	-0.464288	0.024	0.22	7.76217e-11	0.159682	0.844915
PSMA4	9.49525e-18	0.339015	0.678	0.38	1.96523e-13	5.02498	3.29263																				P3H3	3.92474e-13	-0.340265	0.032	0.228	8.12303e-09	0.368708	0.923473
PSMA7	3.50682e-12	0.292415	0.73	0.5	7.25806e-08	6.10532	4.30383																				P4HA2	7.225e-10	-0.310629	0.126	0.386	1.49536e-05	1.43012	2.31537
PSMD10	3.85295e-08	0.333759	0.416	0.238	0.000797444	1.67709	0.917398																				PAEP	2.96941e-11	-1.15574	0.411	0.78	6.14578e-07	9.48987	32.3196
PSMD11	2.20475e-08	0.29242	0.285	0.123	0.000456317	1.00011	0.492995																				PARM1	1.77278e-14	-0.409979	0.028	0.228	3.66913e-10	0.227803	0.850037
PTPN5	6.32005e-14	0.39782	0.443	0.195	1.30806e-09	2.01955	1.02848																				PARVA	5.5948e-11	-0.383974	0.079	0.307	1.15796e-06	0.641818	1.41037
RAB14	2.59257e-07	0.28755	0.355	0.19	0.00536585	1.26746	0.700823																				PCCA	1.2442e-10	-0.31594	0.064	0.276	2.57511e-06	0.711986	1.34807
RAB31	1.38764e-24	0.650225	0.761	0.457	2.872e-20	6.52128	2.92557																				PCOLCE	2.44546e-12	-0.671643	0.105	0.37	5.06138e-08	1.0311	2.97578
RBM17	8.85855e-08	0.306512	0.425	0.238	0.00183345	1.75036	1.02429																				PCYOX1	4.07404e-08	-0.398679	0.158	0.409	0.000843204	1.76092	3.11337
RBM3	1.67192e-06	0.399603	0.342	0.195	0.0346036	1.57992	0.730058																				PDIA5	8.53026e-10	-0.27864	0.036	0.197	1.76551e-05	0.29722	0.714057
RBMS1	1.88746e-10	0.32972	0.592	0.361	3.90648e-06	3.41385	2.17411																				PDLIM1	1.34885e-07	-0.391052	0.088	0.276	0.00279171	0.902205	1.81248
RBP1	1.67936e-14	0.478047	0.654	0.414	3.47577e-10	4.91737	2.66873																				PDLIM2	2.79771e-16	-0.396826	0.032	0.26	5.79041e-12	0.263157	0.878437
RCBTB1	2.90506e-11	0.410598	0.177	0.032	6.0126e-07	0.622159	0.0759027																				PHF11	1.0583e-07	-0.323571	0.034	0.165	0.00219035	0.347212	0.86192
REXO2	2.05499e-08	0.276852	0.633	0.436	0.000425321	4.2098	2.9499																				PKDCC	3.05568e-07	-0.472708	0.015	0.11	0.00632434	0.156712	0.855752
RHOA	3.71856e-09	0.250957	0.682	0.468	7.69631e-05	4.37203	3.17974																				PLBD2	9.47769e-09	-0.308469	0.015	0.126	0.00019616	0.0428645	0.419693
RNF19A	1.09748e-06	0.333244	0.476	0.324	0.0227146	2.27832	1.34923																				PLPP3	1.59751e-07	-0.387662	0.099	0.291	0.00330637	1.11767	2.12045
RNF7	2.29051e-07	0.26885	0.367	0.203	0.00474067	1.39405	0.829668																				PNRC1	2.59391e-07	-0.304199	0.156	0.386	0.00536862	1.71218	2.67647
RORB	4.24056e-13	0.346693	0.553	0.291	8.77669e-09	3.87369	2.4458																				POLR2F	4.02447e-11	-0.350854	0.051	0.252	8.32946e-07	0.512233	1.1478
RTN4	3.22491e-19	0.495667	0.79	0.553	6.6746e-15	8.1425	4.56929																				PPP1R15B	3.94679e-07	-0.272535	0.071	0.236	0.00816868	0.646607	1.16247
S100A11	3.12339e-07	0.251495	0.534	0.348	0.00646449	2.45742	1.68862																				PPP3R1	1.47488e-06	-0.39103	0.015	0.102	0.0305255	0.153416	0.705329
S100A16	7.86945e-10	0.404752	0.328	0.147	1.62874e-05	1.29936	0.534001																				PRPF38B	1.02427e-09	-0.388118	0.221	0.543	2.11994e-05	3.30356	5.34432
S1PR3	1.11895e-06	0.254792	0.359	0.193	0.0231588	1.54652	0.973754																				PRRC2B	2.81124e-09	-0.259996	0.101	0.331	5.81841e-05	1.32111	2.01031
SARS1	7.63812e-08	0.327861	0.495	0.316	0.00158086	2.65382	1.63244																				PRSS23	1.76883e-11	-0.337634	0.041	0.228	3.66095e-07	0.364459	0.912462
SCCPDH	8.33546e-07	0.255142	0.241	0.107	0.0172519	0.811177	0.403312																				PSMF1	9.31166e-09	-0.302961	0.017	0.134	0.000192723	0.112342	0.505956
SDC3	3.96597e-11	0.338367	0.439	0.222	8.20836e-07	1.62681	0.872737																				PTN	9.6602e-13	-0.554295	0.056	0.276	1.99937e-08	0.400554	1.43796
SELENOF	1.34225e-10	0.26559	0.641	0.404	2.77806e-06	3.80214	2.68206																				RALB	2.12339e-09	-0.314481	0.069	0.268	4.39478e-05	0.668539	1.28514
SELENOP	1.60181e-15	0.364614	0.491	0.225	3.31527e-11	2.09344	1.14828																				RAMP1	3.17099e-08	-0.328548	0.026	0.15	0.000656299	0.124525	0.561909
SERPINB6	9.90495e-10	0.362179	0.266	0.099	2.05003e-05	0.809765	0.259883																				RASGRP2	1.84198e-08	-0.451677	0.051	0.213	0.000381234	0.482147	1.32837
SESN2	1.41497e-08	0.272258	0.223	0.078	0.000292857	0.713216	0.304884																				RBBP6	2.31874e-06	-0.346466	0.227	0.488	0.047991	3.23865	4.99371
SIPA1L2	2.37843e-17	0.593106	0.464	0.182	4.92264e-13	3.76148	1.63123																				REN	8.67641e-10	-0.623098	0.047	0.22	1.79576e-05	0.495612	1.78886
SLC26A2	2.30592e-15	0.462766	0.4	0.139	4.77256e-11	1.73263	0.720298																				REV3L	1.7474e-09	-0.506995	0.12	0.362	3.6166e-05	1.19456	2.64361
SLC2A10	1.90499e-10	0.367116	0.482	0.259	3.94275e-06	2.1288	1.16741																				RHOQ	3.9152e-12	-0.498285	0.086	0.339	8.10328e-08	0.895963	2.12056
SLC3A2	1.74822e-19	0.607552	0.491	0.203	3.61829e-15	2.23789	0.763624																				RIMKLB	3.02668e-20	-1.25848	0.244	0.693	6.26432e-16	4.77101	19.3143
SLC4A7	3.15763e-08	0.302339	0.216	0.078	0.000653535	0.868794	0.381203																				RNF40	3.29065e-09	-0.333532	0.013	0.126	6.81067e-05	0.135643	0.585232
SLC7A11	6.74283e-14	0.519464	0.258	0.064	1.39556e-09	0.973116	0.173687																				RORB	6.08e-08	-0.283867	0.077	0.26	0.00125838	0.675961	1.22611
SLC7A8	7.76793e-10	0.370592	0.353	0.168	1.60773e-05	1.47052	0.705465																				RPL7L1	6.68354e-08	-0.263308	0.058	0.22	0.00138329	0.550257	1.01724
SLFN5	3.86619e-10	0.434972	0.476	0.262	8.00185e-06	2.52046	1.27874																				SARAF	2.8536e-07	-0.306645	0.105	0.299	0.0059061	1.04299	1.77614
SMIM30	4.19915e-10	0.278742	0.262	0.091	8.69098e-06	0.80836	0.36845																				SCARA5	1.27064e-11	-0.298017	0.006	0.126	2.62985e-07	0.0245139	0.380209
SNHG29	4.21286e-07	0.298151	0.375	0.211	0.00871936	1.25397	0.672873																				SCARB2	3.55236e-09	-0.388517	0.099	0.323	7.35232e-05	0.860583	1.74397
SORCS1	4.01898e-09	0.300412	0.19	0.053	8.31808e-05	0.502646	0.112729																				SCPEP1	3.05568e-07	-0.251307	0.015	0.11	0.00632434	0.0967288	0.410069
SOX4	3.17444e-14	0.442444	0.68	0.417	6.57015e-10	5.87173	3.41484																				SDF4	8.87998e-09	-0.350726	0.135	0.386	0.000183789	1.5438	2.61245
SPARCL1	8.6711e-09	0.288424	0.866	0.733	0.000179466	26.9888	19.976																				SEC61B	2.36385e-07	-0.296458	0.12	0.331	0.00489247	1.71503	2.65195
SPON2	7.60339e-12	0.326577	0.798	0.594	1.57367e-07	9.2906	6.42352																				SEMA3B	2.6142e-09	-0.680986	0.203	0.488	5.4106e-05	3.14174	7.18336
SPTSSA	6.75041e-32	0.718428	0.829	0.471	1.39713e-27	12.1707	5.42097																				SERPINH1	8.95447e-10	-0.548492	0.158	0.425	1.85331e-05	1.81172	3.86608
ST3GAL5	5.34938e-21	0.504783	0.806	0.503	1.10716e-16	12.8561	7.36403																				SGCB	2.40179e-09	-0.339054	0.09	0.307	4.97098e-05	0.82986	1.56843
SUB1	2.78686e-09	0.303728	0.423	0.225	5.76797e-05	1.7288	1.01403																				SGK1	2.32571e-06	-0.412959	0.032	0.142	0.0481353	0.266869	0.914598
TAFA5	2.00526e-10	0.27992	0.258	0.086	4.15028e-06	0.802463	0.362381																				SH3BP5	2.17931e-08	-0.368997	0.086	0.283	0.000451053	0.99384	1.88366
TARS1	1.74208e-08	0.267648	0.598	0.404	0.000360558	3.97922	2.80999																				SH3PXD2A	5.08897e-08	-0.261294	0.09	0.283	0.00105326	0.784679	1.3176
TBCB	1.58929e-09	0.340245	0.348	0.158	3.28935e-05	1.12071	0.509091																				SIL1	4.36168e-08	-0.394481	0.043	0.189	0.000902736	0.422734	1.11079
TCEAL4	3.11154e-13	0.270674	0.755	0.508	6.43995e-09	6.20568	4.49697																				SIN3B	2.46951e-09	-0.457902	0.049	0.22	5.11115e-05	0.490176	1.3556
TCF7L2	8.29249e-11	0.333611	0.429	0.214	1.7163e-06	1.83562	1.03125																				SIPA1L2	3.46716e-10	-0.425175	0.084	0.307	7.17598e-06	0.871913	1.86376
TCIM	2.19761e-09	0.32501	0.2	0.056	4.5484e-05	0.720352	0.242989																				SLC2A10	1.7378e-10	-0.338572	0.051	0.244	3.59673e-06	0.379381	0.935193
TGFBI	1.83039e-10	0.463184	0.763	0.596	3.78836e-06	14.8352	8.96473																				SLC36A4	5.90363e-07	-0.299683	0.039	0.165	0.0122187	0.439519	0.942532
TGM2	4.14358e-15	0.357843	0.882	0.682	8.57597e-11	17.5448	11.9662																				SLC6A6	1.58123e-06	-0.298517	0.113	0.299	0.0327267	1.30047	2.1007
THSD7A	3.43583e-27	0.680152	0.497	0.142	7.11113e-23	2.96484	1.00835																				SLC7A2	3.33535e-11	-0.586412	0.229	0.575	6.90318e-07	3.20249	6.55409
TIA1	1.89183e-09	0.26428	0.346	0.16	3.91552e-05	1.25273	0.729552																				SMG7	1.35514e-08	-0.470208	0.043	0.197	0.000280474	0.44952	1.31971
TIMP3	1.08358e-13	0.35592	0.963	0.955	2.24268e-09	246.531	172.403																				SNAI2	5.36182e-14	-0.397375	0.028	0.22	1.10974e-09	0.19073	0.771703
TMBIM4	2.41626e-08	0.30033	0.266	0.112	0.000500093	0.920463	0.422244																				SNX1	1.94524e-07	-0.315959	0.069	0.236	0.00402607	0.569297	1.15241
TMEM176B	8.46609e-08	0.313949	0.256	0.11	0.00175223	0.843374	0.346689																				SPARC	1.56398e-07	-0.673799	0.236	0.465	0.00323697	3.31379	7.46225
TMEM50A	4.14502e-09	0.266642	0.563	0.334	8.57894e-05	2.66099	1.80412																				SPARCL1	6.7934e-07	-0.720831	0.233	0.449	0.0140603	4.16061	9.61095
TMEM87A	9.67477e-12	0.364885	0.495	0.265	2.00239e-07	2.31951	1.30466																				SPATS2L	8.99735e-12	-0.304704	0.064	0.291	1.86218e-07	0.607641	1.18032
TMX3	4.91666e-10	0.321619	0.375	0.174	1.0176e-05	1.389	0.731967																				SPOCK1	8.28222e-11	-0.325584	0.081	0.315	1.71417e-06	0.827971	1.53144
TMX4	5.87606e-10	0.261919	0.398	0.201	1.21617e-05	1.4796	0.908237																				SQLE	5.15454e-08	-0.265429	0.105	0.315	0.00106684	1.34169	2.05354
TNFAIP6	1.9957e-10	0.417926	0.433	0.222	4.1305e-06	2.07347	1.0236																				STOM	1.42823e-06	-0.265936	0.03	0.142	0.02956	0.256682	0.639532
TNFRSF12A	1.87724e-07	0.301649	0.245	0.102	0.00388532	1.03768	0.507063																				STT3A	5.12177e-09	-0.532575	0.028	0.165	0.000106005	0.211301	1.06322
TNPO1	3.31306e-09	0.291865	0.245	0.086	6.85704e-05	0.751589	0.308208																				STUB1	2.63244e-07	-0.317608	0.047	0.189	0.00544836	0.531172	1.10358
TPM1	7.8505e-11	0.25478	0.707	0.471	1.62482e-06	5.53387	4.06431																				SUGP2	1.91424e-11	-0.485907	0.161	0.465	3.9619e-07	2.01415	3.89995
TPP2	9.63116e-07	0.321422	0.184	0.067	0.0199336	0.668426	0.209805																				SUGT1	2.06516e-08	-0.317066	0.054	0.22	0.000427427	0.72323	1.36616
TPST1	3.32716e-16	0.389618	0.561	0.286	6.88623e-12	2.64112	1.46619																				SULF2	7.51742e-13	-0.57812	0.099	0.37	1.55588e-08	1.09849	2.74095
TSC22D3	3.06785e-09	0.323495	0.334	0.15	6.34954e-05	1.23227	0.615303																				SUZ12	7.48839e-07	-0.350792	0.077	0.244	0.0154987	0.943763	1.76052
TSPAN14	1.81552e-10	0.268486	0.555	0.329	3.75758e-06	2.75302	1.86932																				SYNPO2	1.88639e-10	-0.394629	0.03	0.189	3.90426e-06	0.282604	0.903171
TSPAN5	3.30807e-11	0.417111	0.499	0.275	6.84672e-07	2.57406	1.35512																				TBC1D2B	1.40659e-08	-0.395894	0.03	0.165	0.000291122	0.263548	0.877269
TUBA1A	3.52426e-13	0.406653	0.553	0.297	7.29416e-09	3.29537	1.86018																				TCEAL3	1.03196e-06	-0.373499	0.105	0.283	0.0213585	1.09359	2.04159
TUSC3	2.87428e-12	0.433727	0.359	0.147	5.94889e-08	1.29625	0.488177																				TCEAL4	1.24808e-06	-0.396411	0.169	0.386	0.0258314	2.22073	3.78755
TWISTNB	3.37046e-16	0.586052	0.654	0.372	6.97584e-12	10.1872	5.22592																				TCEAL8	2.19221e-08	-0.251784	0.058	0.228	0.000453722	0.578128	1.02997
VCL	4.08054e-11	0.398271	0.555	0.329	8.44549e-07	3.17057	1.80045																				TENT5A	3.71136e-07	-0.481238	0.045	0.181	0.00768141	0.570105	1.54055
VPS29	3.99958e-12	0.4402	0.464	0.23	8.27792e-08	2.05339	0.9661																				TFPI	9.02307e-13	-0.29979	0.056	0.283	1.8675e-08	0.649481	1.2261
WNK1	6.02687e-13	0.307846	0.563	0.289	1.24738e-08	2.71806	1.73288																				TGFBI	6.08386e-07	-0.389876	0.167	0.394	0.0125918	2.16976	3.6811
WSB1	3.28057e-07	0.286144	0.701	0.532	0.00678979	5.70948	4.03985																				THY1	1.2397e-06	-0.501311	0.099	0.276	0.0256581	0.901791	2.13964
XAF1	6.18052e-16	0.307601	0.548	0.257	1.27918e-11	3.16441	2.06171																				TIMP2	1.41401e-06	-0.348936	0.263	0.52	0.0292657	4.15013	6.3006
XPOT	7.56415e-09	0.348334	0.313	0.142	0.000156555	1.0588	0.453228																				TLN1	1.54083e-10	-0.288513	0.126	0.394	3.18905e-06	1.64411	2.52841
YARS1	6.09975e-13	0.382016	0.373	0.147	1.26246e-08	1.32398	0.586078																				TM2D1	6.55586e-07	-0.267313	0.032	0.15	0.0135687	0.222516	0.597156
YWHAQ	8.92203e-10	0.253936	0.353	0.155	1.84659e-05	1.18004	0.691147																				TM7SF3	2.08046e-06	-0.416912	0.021	0.118	0.0430592	0.273047	0.931554
ZEB1	1.16464e-09	0.295487	0.804	0.639	2.41046e-05	10.716	7.7187																				TMEM263	7.14992e-11	-0.473975	0.073	0.291	1.47982e-06	0.591665	1.5568
ZFP36	1.45382e-09	0.265348	0.499	0.275	3.00898e-05	2.45543	1.65011																				TMEM43	1.60184e-10	-0.280547	0.073	0.291	3.31532e-06	0.835886	1.43044
ZMYM5	8.35515e-07	0.31441	0.264	0.126	0.0172927	0.954445	0.427173																				TMEM45A	5.04787e-09	-0.384632	0.062	0.244	0.000104476	0.413547	1.0766
ZMYND8	7.35853e-10	0.348639	0.414	0.209	1.523e-05	2.0622	1.16083																				TP53I3	1.20201e-06	-0.267374	0.03	0.142	0.024878	0.237464	0.616783
AKAP12	1.72098e-08	-0.790036	0.386	0.503	0.000356191	2.27525	6.21693																				TRIOBP	3.77773e-09	-0.265148	0.081	0.291	7.81878e-05	0.810115	1.35971
AL390719.1	1.83423e-07	-0.40144	0.06	0.166	0.00379631	0.1639	0.738836																				TSHZ2	6.5747e-07	-0.348652	0.099	0.283	0.0136077	1.01006	1.84857
C1R	4.66974e-14	-0.449565	0.866	0.872	9.66495e-10	11.9549	19.3085																				TUBA1A	4.87766e-08	-0.281798	0.081	0.268	0.00100953	0.845846	1.44669
C3	9.44601e-07	-0.547664	0.462	0.521	0.0195504	2.11918	4.39371																				TUBB	1.6024e-07	-0.333098	0.137	0.362	0.00331649	1.29974	2.20879
CA12	1.48075e-07	-0.625656	0.528	0.588	0.0030647	3.49073	7.39529																				TWIST2	2.18008e-11	-0.426874	0.024	0.181	4.51211e-07	0.250896	0.916947
CA9	2.21562e-07	-0.437343	0.058	0.163	0.00458566	0.196955	0.85359																				TWISTNB	2.47435e-07	-0.44313	0.161	0.394	0.00512117	2.02888	3.7177
CCL20	6.11072e-07	-0.544318	0.179	0.31	0.0126474	0.786008	2.07807																				TXNDC15	5.52121e-09	-0.311227	0.041	0.197	0.000114272	0.320288	0.802324
CDKN1C	1.25245e-07	-0.790883	0.511	0.594	0.00259219	3.67501	9.31																				UQCRH	1.09462e-06	-0.316226	0.101	0.283	0.0226553	1.33492	2.20337
CES1	1.06605e-11	-0.65354	0.101	0.267	2.20641e-07	0.367979	1.62971																				USF2	2.94967e-07	-0.303384	0.047	0.189	0.00610493	0.4056	0.903792
COL5A3	7.1389e-09	-0.540698	0.068	0.193	0.000147754	0.179408	1.02529																				USP4	1.18667e-07	-0.317696	0.034	0.165	0.00245605	0.349242	0.853804
CPE	2.56309e-13	-1.03313	0.091	0.27	5.30482e-09	0.491333	3.19041																				VCAN	1.08045e-10	-0.592806	0.195	0.496	2.23621e-06	3.17706	6.55654
CSF3	2.50239e-09	-0.52081	0.027	0.134	5.1792e-05	0.212146	1.04051																				VGF	7.64207e-08	-0.256741	0.013	0.11	0.00158168	0.0968314	0.417886
DNER	1.51005e-15	-0.530917	0.029	0.193	3.12535e-11	0.0949194	0.861901																				VKORC1	5.32616e-11	-0.401853	0.054	0.252	1.10236e-06	0.414019	1.11338
EGLN3	3.31073e-07	-0.480577	0.085	0.201	0.00685223	0.438878	1.32668																				WARS1	1.42507e-06	-0.36517	0.045	0.173	0.0294947	0.455464	1.09697
ENO2	1.12059e-10	-0.641064	0.299	0.468	2.31928e-06	1.31154	3.38846																				WASF2	6.7643e-09	-0.311738	0.109	0.339	0.000140001	1.49885	2.41293
EREG	3.95098e-09	-0.673421	0.113	0.262	8.17734e-05	0.803203	2.53596																				WBP11	1.54649e-12	-0.371907	0.051	0.268	3.20076e-08	0.487804	1.15806
FBLN2	6.08669e-08	-0.32588	0.089	0.217	0.00125976	0.301962	0.803542																				WT1	3.8793e-08	-0.522469	0.099	0.299	0.000802899	0.803761	2.04148
FBXO32	2.45196e-07	-0.533191	0.103	0.225	0.00507481	0.434863	1.44553																				YIF1B	9.02842e-08	-0.331878	0.011	0.102	0.00186861	0.0415246	0.45145
FGF7	9.56499e-07	-0.662508	0.138	0.257	0.0197967	0.62333	2.14869																				ZEB1	4.23412e-09	-0.534052	0.184	0.457	8.76337e-05	2.12109	4.32406
GAPDH	6.59236e-09	-0.579204	0.849	0.765	0.000136442	11.4053	21.1386																				ZMYM5	3.67268e-08	-0.46927	0.056	0.22	0.000760134	0.600716	1.55927
GOLGA4	1.18458e-09	-0.536513	0.718	0.741	2.45173e-05	5.67451	10.4136																				ZNF143	3.46384e-07	-0.281651	0.015	0.11	0.0071691	0.146948	0.520068
HILPDA	8.16315e-10	-0.739878	0.128	0.278	1.68953e-05	0.391084	1.91527																				ZNF638	1.54134e-06	-0.285933	0.197	0.441	0.0319011	2.7664	4.01308
HLA-DRB1	1.44186e-07	-0.257951	0.037	0.134	0.00298422	0.148065	0.485911																				ZNHIT6	3.74168e-08	-0.322895	0.049	0.205	0.000774415	0.738941	1.40169
IFI6	9.67555e-11	-0.728587	0.637	0.684	2.00255e-06	6.45667	14.4513
LMAN1	5.25831e-08	-0.53958	0.693	0.684	0.00108831	4.25815	8.01923
NRCAM	2.36694e-09	-0.413957	0.039	0.155	4.89886e-05	0.102605	0.668012
PAG1	1.15334e-10	-0.602959	0.043	0.171	2.38707e-06	0.0860788	0.984829
PKIG	9.35613e-10	-0.826485	0.309	0.452	1.93644e-05	1.18396	3.99094
PNISR	1.23149e-06	-0.445046	0.726	0.719	0.025488	5.62566	9.33975
PTGES	3.23758e-12	-0.531534	0.037	0.179	6.70082e-08	0.119071	0.904146
RGS4	1.23976e-09	-0.565182	0.033	0.147	2.56594e-05	0.155558	1.03351
SERF2	3.42425e-07	-0.313219	0.843	0.799	0.00708717	10.5476	14.7951
SLC2A1	7.14593e-09	-0.716452	0.272	0.412	0.000147899	1.06295	3.22319
SST	2.8596e-10	-1.55757	0.016	0.12	5.91851e-06	0.0923642	4.18577
SYT7	2.13063e-06	-0.31072	0.058	0.155	0.0440976	0.270856	0.733964
TBX3	1.23821e-08	-0.589329	0.641	0.676	0.000256271	4.50714	8.92815
TUBA4A	7.16703e-07	-0.320035	0.031	0.115	0.0148336	0.0760603	0.481924
USP53	1.85093e-06	-0.762169	0.169	0.281	0.0383087	0.745899	2.74132
[truncated: 3 more columns]
