# Supplementary material for: Modelling the impact of decidual senescence on embryo implantation in human endometrial assembloids
Source: eLife. 2021 Sep 6;10:e69603. doi: 10.7554/eLife.69603 (PMC8523170; doi:10.7554/eLife.69603)
Supplement: Figure 5—source data 2. [file elife-69603-fig5-data2.xlsx]

## Sheet: Figure 5-Source Data 2
Figure 5-Source Data 2 - GO analysis for Day 4 populations treated with and without dasatinib
GO analysis results for SS3									GO analysis results for EpS4									GO analysis results for TP
Analysis Type:	PANTHER Overrepresentation Test (Released 20200728)								Analysis Type:	PANTHER Overrepresentation Test (Released 20200728)								Analysis Type:	PANTHER Overrepresentation Test (Released 20200728)
Annotation Version and Release Date:	GO Ontology database DOI: 10.5281/zenodo.4081749 Released 2020-10-09								Annotation Version and Release Date:	GO Ontology database DOI: 10.5281/zenodo.4081749 Released 2020-10-09								Annotation Version and Release Date:	GO Ontology database DOI: 10.5281/zenodo.4081749 Released 2020-10-09
Analyzed List:	upload_1 (Homo sapiens)								Analyzed List:	upload_1 (Homo sapiens)								Analyzed List:	upload_1 (Homo sapiens)
Reference List:	Homo sapiens (all genes in database)								Reference List:	Homo sapiens (all genes in database)								Reference List:	Homo sapiens (all genes in database)
Test Type:	FISHER								Test Type:	FISHER								Test Type:	FISHER
Correction:	FDR								Correction:	FDR								Correction:	FDR
GO biological process complete	Homo sapiens - REFLIST (20595)	upload_1 (250)	expected	over/under	fold Enrichment	raw P-value	FDR		GO biological process complete	Homo sapiens - REFLIST (20595)	upload_1 (37)	expected	over/under	fold Enrichment	raw P-value	FDR		GO biological process complete	Homo sapiens - REFLIST (20595)	upload_1 (258)	expected	over/under	fold Enrichment	raw P-value	FDR
cellular process (GO:0009987)	15475	232	187.85	+	1.24	7.75e-13	1.23e-08		response to growth factor (GO:0070848)	528	11	0.95	+	11.6	1.62e-09	1.28e-05		extracellular structure organization (GO:0043062)	364	26	4.56	+	5.7	3.33e-12	2.64e-08
response to organic substance (GO:0010033)	3006	75	36.49	+	2.06	7.67e-10	6.08e-06		response to endogenous stimulus (GO:0009719)	1417	16	2.55	+	6.29	8.6e-10	1.36e-05		extracellular matrix organization (GO:0030198)	363	26	4.55	+	5.72	3.14e-12	4.98e-08
cellular response to chemical stimulus (GO:0070887)	2924	73	35.49	+	2.06	1.59e-09	6.3e-06		response to organic substance (GO:0010033)	3006	21	5.4	+	3.89	3.47e-09	1.84e-05		skeletal system development (GO:0001501)	488	23	6.11	+	3.76	1.09e-07	0.000578
response to chemical (GO:0042221)	4392	96	53.31	+	1.8	1.33e-09	7.04e-06		response to lipid (GO:0033993)	844	12	1.52	+	7.91	1.71e-08	6.79e-05		anatomical structure morphogenesis (GO:0009653)	2180	55	27.31	+	2.01	7.08e-07	0.00281
system development (GO:0048731)	4313	94	52.35	+	1.8	2.81e-09	8.91e-06		response to oxygen-containing compound (GO:1901700)	1596	15	2.87	+	5.23	4.13e-08	0.000131		regulation of developmental process (GO:0050793)	2465	59	30.88	+	1.91	1.1e-06	0.00349
response to stimulus (GO:0050896)	8502	150	103.2	+	1.45	4.18e-09	9.48e-06		cellular response to organic substance (GO:0071310)	2350	17	4.22	+	4.03	1.61e-07	0.000427		circulatory system development (GO:0072359)	871	29	10.91	+	2.66	2.57e-06	0.00679
positive regulation of cellular process (GO:0048522)	5685	113	69.01	+	1.64	3.77e-09	9.98e-06		cellular response to oxygen-containing compound (GO:1901701)	1069	12	1.92	+	6.25	2.2e-07	0.000437		negative regulation of cellular process (GO:0048523)	4946	96	61.96	+	1.55	3.32e-06	0.00752
nervous system development (GO:0007399)	2202	59	26.73	+	2.21	7.25e-09	1.44e-05		cellular response to growth factor stimulus (GO:0071363)	500	9	0.9	+	10.02	2.12e-07	0.000481		biological_process (GO:0008150)	17857	246	223.7	+	1.1	7.03e-06	0.0093
regulation of developmental process (GO:0050793)	2465	63	29.92	+	2.11	1.25e-08	2.21e-05		positive regulation of mRNA metabolic process (GO:1903313)	85	5	0.15	+	32.74	5.51e-07	0.000795		vasculature development (GO:0001944)	525	21	6.58	+	3.19	4.84e-06	0.00959
response to wounding (GO:0009611)	540	25	6.55	+	3.81	2.23e-08	3.54e-05		positive regulation of cellular process (GO:0048522)	5685	25	10.21	+	2.45	5.04e-07	0.0008		blood vessel development (GO:0001568)	502	20	6.29	+	3.18	8.66e-06	0.00981
response to stress (GO:0006950)	3648	81	44.28	+	1.83	2.6e-08	3.75e-05		cellular response to endogenous stimulus (GO:0071495)	1146	12	2.06	+	5.83	4.62e-07	0.000814		negative regulation of biological process (GO:0048519)	5581	104	69.91	+	1.49	5.73e-06	0.0101
cellular response to organic substance (GO:0071310)	2350	60	28.53	+	2.1	3.75e-08	4.95e-05		cellular response to chemical stimulus (GO:0070887)	2924	18	5.25	+	3.43	6.54e-07	0.000865		collagen fibril organization (GO:0030199)	50	7	0.63	+	11.18	6.38e-06	0.0101
neurogenesis (GO:0022008)	1401	43	17.01	+	2.53	4.14e-08	5.05e-05		cellular response to stress (GO:0033554)	1755	14	3.15	+	4.44	1.02e-06	0.00115		Unclassified (UNCLASSIFIED)	2738	12	34.3	-	0.35	7.03e-06	0.0101
multicellular organism development (GO:0007275)	4899	98	59.47	+	1.65	8.52e-08	7.12e-05		response to organonitrogen compound (GO:0010243)	997	11	1.79	+	6.14	9.5e-07	0.00116		supramolecular fiber organization (GO:0097435)	501	20	6.28	+	3.19	8.42e-06	0.0103
Unclassified (UNCLASSIFIED)	2738	8	33.24	-	0.24	8.4e-08	7.4e-05		response to hormone (GO:0009725)	816	10	1.47	+	6.82	1.3e-06	0.00138		negative regulation of developmental process (GO:0051093)	887	28	11.11	+	2.52	1.01e-05	0.0107
biological_process (GO:0008150)	17857	242	216.76	+	1.12	8.4e-08	7.84e-05		response to lipopolysaccharide (GO:0032496)	321	7	0.58	+	12.14	1.65e-06	0.00154		collagen biosynthetic process (GO:0032964)	9	4	0.11	+	35.48	1.5e-05	0.0149
developmental process (GO:0032502)	5757	110	69.88	+	1.57	8.19e-08	8.12e-05		negative regulation of cellular protein metabolic process (GO:0032269)	1053	11	1.89	+	5.81	1.61e-06	0.0016		response to organic substance (GO:0010033)	3006	64	37.66	+	1.7	1.82e-05	0.017
positive regulation of biological process (GO:0048518)	6275	117	76.17	+	1.54	8.1e-08	8.57e-05		response to nitrogen compound (GO:1901698)	1083	11	1.95	+	5.65	2.12e-06	0.00187		connective tissue development (GO:0061448)	209	12	2.62	+	4.58	2.12e-05	0.0177
cell differentiation (GO:0030154)	3537	78	42.94	+	1.82	7.61e-08	8.62e-05		response to chemical (GO:0042221)	4392	21	7.89	+	2.66	2.85e-06	0.00188		collagen metabolic process (GO:0032963)	62	7	0.78	+	9.01	2.3e-05	0.0182
cellular response to stimulus (GO:0051716)	6793	123	82.46	+	1.49	1.53e-07	0.000115		response to molecule of bacterial origin (GO:0002237)	338	7	0.61	+	11.53	2.3e-06	0.00192		negative regulation of protein metabolic process (GO:0051248)	1109	32	13.89	+	2.3	2.07e-05	0.0182
cellular developmental process (GO:0048869)	3593	78	43.61	+	1.79	1.49e-07	0.000118		skeletal muscle cell differentiation (GO:0035914)	51	4	0.09	+	43.66	2.8e-06	0.00193		regulation of multicellular organismal process (GO:0051239)	2696	58	33.77	+	1.72	3.91e-05	0.027
regulation of multicellular organismal development (GO:2000026)	1331	40	16.16	+	2.48	1.91e-07	0.000126		negative regulation of protein metabolic process (GO:0051248)	1109	11	1.99	+	5.52	2.66e-06	0.00201		multicellular organism development (GO:0007275)	4899	91	61.37	+	1.48	3.6e-05	0.0272
regulation of cell death (GO:0010941)	1665	46	20.21	+	2.28	1.81e-07	0.000131		response to organic cyclic compound (GO:0014070)	889	10	1.6	+	6.26	2.8e-06	0.00202		biological adhesion (GO:0022610)	951	28	11.91	+	2.35	3.8e-05	0.0274
response to oxidative stress (GO:0006979)	400	20	4.86	+	4.12	1.9e-07	0.000131		positive regulation of mRNA catabolic process (GO:0061014)	53	4	0.1	+	42.01	3.23e-06	0.00205		cartilage development (GO:0051216)	156	10	1.95	+	5.12	4.33e-05	0.0275
generation of neurons (GO:0048699)	1278	39	15.51	+	2.51	2.28e-07	0.000139		cellular response to lipid (GO:0071396)	500	8	0.9	+	8.91	2.63e-06	0.00209		negative regulation of nitrogen compound metabolic process (GO:0051172)	2447	54	30.65	+	1.76	4.18e-05	0.0276
regulation of cell communication (GO:0010646)	3432	75	41.66	+	1.8	2.25e-07	0.000143		regulation of cell death (GO:0010941)	1665	13	2.99	+	4.35	3.61e-06	0.00212		developmental process (GO:0032502)	5757	103	72.12	+	1.43	4.77e-05	0.028
tRNA aminoacylation for protein translation (GO:0006418)	46	8	0.56	+	14.33	2.47e-07	0.000145		positive regulation of nuclear-transcribed mRNA poly(A) tail shortening (GO:0060213)	14	3	0.03	+	> 100	3.55e-06	0.00217		ossification (GO:0001503)	265	13	3.32	+	3.92	4.62e-05	0.0282
neuron differentiation (GO:0030182)	1050	34	12.75	+	2.67	2.87e-07	0.000152		cellular response to stimulus (GO:0051716)	6793	26	12.2	+	2.13	4.33e-06	0.00237		response to stress (GO:0006950)	3648	72	45.7	+	1.58	5.51e-05	0.0301
positive regulation of nitrogen compound metabolic process (GO:0051173)	3202	71	38.87	+	1.83	2.8e-07	0.000153		regulation of translation (GO:0006417)	372	7	0.67	+	10.47	4.28e-06	0.00242		regulation of protein metabolic process (GO:0051246)	2798	59	35.05	+	1.68	5.41e-05	0.0306
anatomical structure development (GO:0048856)	5294	102	64.26	+	1.59	2.76e-07	0.000156		positive regulation of biological process (GO:0048518)	6275	25	11.27	+	2.22	5.14e-06	0.00255		cellular process (GO:0009987)	15475	221	193.86	+	1.14	5.85e-05	0.0309
response to abiotic stimulus (GO:0009628)	1162	36	14.11	+	2.55	3.47e-07	0.000172		negative regulation of translation (GO:0017148)	136	5	0.24	+	20.46	5.07e-06	0.0026		negative regulation of multicellular organismal process (GO:0051241)	1022	29	12.8	+	2.27	6.88e-05	0.0352
organonitrogen compound metabolic process (GO:1901564)	5402	103	65.57	+	1.57	3.41e-07	0.000174		regulation of nuclear-transcribed mRNA poly(A) tail shortening (GO:0060211)	16	3	0.03	+	> 100	5.04e-06	0.00267		biological regulation (GO:0065007)	12575	188	157.53	+	1.19	8.37e-05	0.0391
tRNA aminoacylation (GO:0043039)	49	8	0.59	+	13.45	3.81e-07	0.000178		response to stimulus (GO:0050896)	8502	29	15.27	+	1.9	5.83e-06	0.0028		cell adhesion (GO:0007155)	945	27	11.84	+	2.28	8.19e-05	0.0394
response to oxygen-containing compound (GO:1901700)	1596	44	19.37	+	2.27	3.79e-07	0.000182		negative regulation of cellular amide metabolic process (GO:0034249)	154	5	0.28	+	18.07	9.11e-06	0.00425		regulation of cell migration (GO:0030334)	894	26	11.2	+	2.32	8.85e-05	0.0401
amino acid activation (GO:0043038)	50	8	0.61	+	13.18	4.37e-07	0.000187		negative regulation of nitrogen compound metabolic process (GO:0051172)	2447	15	4.4	+	3.41	9.67e-06	0.00426		response to unfolded protein (GO:0006986)	169	10	2.12	+	4.72	8.16e-05	0.0405
cellular response to oxygen-containing compound (GO:1901701)	1069	34	12.98	+	2.62	4.27e-07	0.000188		rhythmic process (GO:0048511)	273	6	0.49	+	12.23	9.47e-06	0.00429		anatomical structure development (GO:0048856)	5294	95	66.32	+	1.43	0.000102	0.0449
regulation of DNA-templated transcription in response to stress (GO:0043620)	117	11	1.42	+	7.75	4.19e-07	0.00019		inorganic anion transport (GO:0015698)	158	5	0.28	+	17.61	1.03e-05	0.00441		system development (GO:0048731)	4313	81	54.03	+	1.5	0.00011	0.046
anatomical structure morphogenesis (GO:0009653)	2180	54	26.46	+	2.04	4.74e-07	0.000198		regulation of cellular amide metabolic process (GO:0034248)	431	7	0.77	+	9.04	1.1e-05	0.00459		cellular response to organic substance (GO:0071310)	2350	51	29.44	+	1.73	0.00011	0.0471
negative regulation of cellular process (GO:0048523)	4946	96	60.04	+	1.6	5.06e-07	0.000201		positive regulation of macromolecule metabolic process (GO:0010604)	3566	18	6.41	+	2.81	1.2e-05	0.00489
animal organ development (GO:0048513)	3244	71	39.38	+	1.8	5e-07	0.000203		positive regulation of nitrogen compound metabolic process (GO:0051173)	3202	17	5.75	+	2.96	1.26e-05	0.00499
regulation of signal transduction (GO:0009966)	3068	68	37.24	+	1.83	6.76e-07	0.000255		positive regulation of cell death (GO:0010942)	629	8	1.13	+	7.08	1.38e-05	0.00535
regulation of signaling (GO:0023051)	3468	74	42.1	+	1.76	6.65e-07	0.000257		response to external stimulus (GO:0009605)	2532	15	4.55	+	3.3	1.47e-05	0.00554
regulation of programmed cell death (GO:0043067)	1528	42	18.55	+	2.26	7.99e-07	0.000295		response to stress (GO:0006950)	3648	18	6.55	+	2.75	1.66e-05	0.00613
extracellular structure organization (GO:0043062)	364	18	4.42	+	4.07	9.23e-07	0.000318		negative regulation of polynucleotide adenylyltransferase activity (GO:1904246)	2	2	0	+	> 100	1.87e-05	0.00675
extracellular matrix organization (GO:0030198)	363	18	4.41	+	4.08	8.89e-07	0.000321		negative regulation of interleukin-2 production (GO:0032703)	27	3	0.05	+	61.85	2.08e-05	0.00735
positive regulation of macromolecule metabolic process (GO:0010604)	3566	75	43.29	+	1.73	9.13e-07	0.000322		negative regulation of cellular metabolic process (GO:0031324)	2652	15	4.76	+	3.15	2.56e-05	0.00883
metabolic process (GO:0008152)	8511	142	103.31	+	1.37	1.09e-06	0.000346		positive regulation of cellular metabolic process (GO:0031325)	3385	17	6.08	+	2.8	2.66e-05	0.00897
cellular response to stress (GO:0033554)	1755	46	21.3	+	2.16	1.08e-06	0.000349		regulation of cell communication (GO:0010646)	3432	17	6.17	+	2.76	3.19e-05	0.00905
tube development (GO:0035295)	860	29	10.44	+	2.78	1.07e-06	0.000353		response to ketone (GO:1901654)	203	5	0.36	+	13.71	3.33e-05	0.0091
movement of cell or subcellular component (GO:0006928)	1592	43	19.33	+	2.23	1.14e-06	0.000355		positive regulation of signaling (GO:0023056)	1730	12	3.11	+	3.86	3.17e-05	0.00914
cell development (GO:0048468)	1654	44	20.08	+	2.19	1.05e-06	0.000356		multicellular organismal process (GO:0032501)	6972	25	12.53	+	2	3.42e-05	0.00919
regulation of apoptotic process (GO:0042981)	1495	41	18.15	+	2.26	1.17e-06	0.000358		regulation of signal transduction (GO:0009966)	3068	16	5.51	+	2.9	3.32e-05	0.00924
positive regulation of cellular metabolic process (GO:0031325)	3385	72	41.09	+	1.75	1.23e-06	0.000369		positive regulation of neuron death (GO:1901216)	97	4	0.17	+	22.95	3.16e-05	0.00927
central nervous system development (GO:0007417)	1019	32	12.37	+	2.59	1.26e-06	0.000371		regulation of mRNA metabolic process (GO:1903311)	350	6	0.63	+	9.54	3.74e-05	0.00928
localization (GO:0051179)	5832	107	70.79	+	1.51	1.33e-06	0.000385		response to external biotic stimulus (GO:0043207)	1429	11	2.57	+	4.28	2.9e-05	0.00938
cell migration (GO:0016477)	973	31	11.81	+	2.62	1.41e-06	0.000398		regulation of signaling (GO:0023051)	3468	17	6.23	+	2.73	3.67e-05	0.00938
regulation of biological quality (GO:0065008)	4013	81	48.71	+	1.66	1.77e-06	0.000492		negative regulation of cellular macromolecule biosynthetic process (GO:2000113)	1469	11	2.64	+	4.17	3.73e-05	0.0094
gliogenesis (GO:0042063)	233	14	2.83	+	4.95	1.84e-06	0.000496		response to biotic stimulus (GO:0009607)	1464	11	2.63	+	4.18	3.62e-05	0.00941
regulation of multicellular organismal process (GO:0051239)	2696	61	32.73	+	1.86	1.84e-06	0.000503		positive regulation of metabolic process (GO:0009893)	3852	18	6.92	+	2.6	3.57e-05	0.00944
regulation of cell differentiation (GO:0045595)	1573	42	19.09	+	2.2	1.92e-06	0.000508		response to cAMP (GO:0051591)	97	4	0.17	+	22.95	3.16e-05	0.00945
regulation of transcription from RNA polymerase II promoter in response to stress (GO:0043618)	111	10	1.35	+	7.42	2.03e-06	0.000528		response to other organism (GO:0051707)	1427	11	2.56	+	4.29	2.86e-05	0.00945
organic substance metabolic process (GO:0071704)	7945	134	96.44	+	1.39	2.18e-06	0.000557		positive regulation of cell communication (GO:0010647)	1723	12	3.1	+	3.88	3.04e-05	0.00947
tube morphogenesis (GO:0035239)	664	24	8.06	+	2.98	3.1e-06	0.000757		regulation of polynucleotide adenylyltransferase activity (GO:1904245)	3	2	0.01	+	> 100	3.12e-05	0.00951
wound healing (GO:0042060)	439	19	5.33	+	3.57	3.02e-06	0.00076		positive regulation of RNA metabolic process (GO:0051254)	1721	12	3.09	+	3.88	3.01e-05	0.00955
cellular response to oxidative stress (GO:0034599)	244	14	2.96	+	4.73	3.07e-06	0.000761		mRNA destabilization (GO:0061157)	34	3	0.06	+	49.11	3.96e-05	0.00965
response to growth factor (GO:0070848)	528	21	6.41	+	3.28	3.23e-06	0.000776		response to bacterium (GO:0009617)	734	8	1.32	+	6.07	4.12e-05	0.00991
positive regulation of signaling (GO:0023056)	1730	44	21	+	2.1	3.37e-06	0.000799		regulation of apoptotic process (GO:0042981)	1495	11	2.69	+	4.1	4.38e-05	0.0102
positive regulation of signal transduction (GO:0009967)	1561	41	18.95	+	2.16	3.56e-06	0.000831		response to mechanical stimulus (GO:0009612)	215	5	0.39	+	12.94	4.35e-05	0.0103
homeostatic process (GO:0042592)	1668	43	20.25	+	2.12	3.71e-06	0.000852		RNA destabilization (GO:0050779)	37	3	0.07	+	45.13	5.01e-05	0.0115
negative regulation of biological process (GO:0048519)	5581	102	67.75	+	1.51	4.01e-06	0.000896		negative regulation of macromolecule biosynthetic process (GO:0010558)	1520	11	2.73	+	4.03	5.1e-05	0.0116
locomotion (GO:0040011)	1340	37	16.27	+	2.27	4e-06	0.000908		regulation of programmed cell death (GO:0043067)	1528	11	2.75	+	4.01	5.35e-05	0.0118
positive regulation of metabolic process (GO:0009893)	3852	77	46.76	+	1.65	4.43e-06	0.000964		posttranscriptional regulation of gene expression (GO:0010608)	553	7	0.99	+	7.05	5.3e-05	0.0119
regulation of cellular protein metabolic process (GO:0032268)	2661	59	32.3	+	1.83	4.42e-06	0.000974		cellular process (GO:0009987)	15475	37	27.8	+	1.33	5.93e-05	0.0129
cellular response to chemical stress (GO:0062197)	290	15	3.52	+	4.26	4.55e-06	0.000975		positive regulation of pri-miRNA transcription by RNA polymerase II (GO:1902895)	40	3	0.07	+	41.75	6.24e-05	0.0134
regulation of protein metabolic process (GO:0051246)	2798	61	33.96	+	1.8	4.69e-06	0.000992		regulation of DNA-templated transcription in response to stress (GO:0043620)	117	4	0.21	+	19.03	6.4e-05	0.0135
cell activation (GO:0001775)	1075	32	13.05	+	2.45	4.86e-06	0.00101		positive regulation of signal transduction (GO:0009967)	1561	11	2.8	+	3.92	6.49e-05	0.0136
immune system process (GO:0002376)	2856	62	34.67	+	1.79	5.27e-06	0.00109		bicarbonate transport (GO:0015701)	42	3	0.08	+	39.76	7.15e-05	0.0144
regulation of cell migration (GO:0030334)	894	28	10.85	+	2.58	6.46e-06	0.00131		negative regulation of phosphorus metabolic process (GO:0010563)	580	7	1.04	+	6.72	7.13e-05	0.0145
response to oxygen levels (GO:0070482)	381	17	4.62	+	3.68	6.92e-06	0.00139		negative regulation of cellular biosynthetic process (GO:0031327)	1582	11	2.84	+	3.87	7.32e-05	0.0145
cellular metabolic process (GO:0044237)	7716	129	93.66	+	1.38	7.04e-06	0.0014		negative regulation of phosphate metabolic process (GO:0045936)	579	7	1.04	+	6.73	7.06e-05	0.0145
positive regulation of cellular component movement (GO:0051272)	559	21	6.79	+	3.09	7.51e-06	0.00142		negative regulation of macromolecule metabolic process (GO:0010605)	2902	15	5.21	+	2.88	7.43e-05	0.0146
negative regulation of protein metabolic process (GO:0051248)	1109	32	13.46	+	2.38	7.73e-06	0.00143		positive regulation of nucleobase-containing compound metabolic process (GO:0045935)	1896	12	3.41	+	3.52	7.77e-05	0.0148
neuron development (GO:0048666)	850	27	10.32	+	2.62	7.47e-06	0.00143		skeletal muscle tissue development (GO:0007519)	123	4	0.22	+	18.1	7.73e-05	0.0149
cell motility (GO:0048870)	1106	32	13.43	+	2.38	7.39e-06	0.00143		negative regulation of biosynthetic process (GO:0009890)	1611	11	2.89	+	3.8	8.63e-05	0.0163
response to reactive oxygen species (GO:0000302)	194	12	2.35	+	5.1	7.68e-06	0.00143		negative regulation of protein modification process (GO:0031400)	620	7	1.11	+	6.28	0.000108	0.0199
localization of cell (GO:0051674)	1106	32	13.43	+	2.38	7.39e-06	0.00145		skeletal muscle organ development (GO:0060538)	134	4	0.24	+	16.62	0.000107	0.0199
negative regulation of cellular protein metabolic process (GO:0032269)	1053	31	12.78	+	2.43	8.18e-06	0.00149		regulation of cellular protein metabolic process (GO:0032268)	2661	14	4.78	+	2.93	0.00012	0.0216
nitrogen compound metabolic process (GO:0006807)	7032	120	85.36	+	1.41	8.49e-06	0.00153		response to organophosphorus (GO:0046683)	138	4	0.25	+	16.13	0.000119	0.0217
positive regulation of cell communication (GO:0010647)	1723	43	20.92	+	2.06	9.25e-06	0.00165		regulation of pri-miRNA transcription by RNA polymerase II (GO:1902893)	52	3	0.09	+	32.11	0.000131	0.0233
apoptotic process (GO:0006915)	913	28	11.08	+	2.53	9.43e-06	0.00166		negative regulation of gene expression (GO:0010629)	2018	12	3.63	+	3.31	0.000141	0.0236
positive regulation of cell migration (GO:0030335)	523	20	6.35	+	3.15	9.72e-06	0.00169		regulation of molecular function (GO:0065009)	3067	15	5.51	+	2.72	0.000141	0.0238
response to cytokine (GO:0034097)	1125	32	13.66	+	2.34	9.88e-06	0.0017		response to glucocorticoid (GO:0051384)	144	4	0.26	+	15.46	0.00014	0.0238
vasculature development (GO:0001944)	525	20	6.37	+	3.14	1.03e-05	0.00173		response to cytokine (GO:0034097)	1125	9	2.02	+	4.45	0.000136	0.024
regulation of hemopoiesis (GO:1903706)	393	17	4.77	+	3.56	1.02e-05	0.00174		p38MAPK cascade (GO:0038066)	8	2	0.01	+	> 100	0.00014	0.0241
regulation of phosphorylation (GO:0042325)	1634	41	19.83	+	2.07	1.07e-05	0.00178		L-serine biosynthetic process (GO:0006564)	8	2	0.01	+	> 100	0.00014	0.0243
positive regulation of macromolecule biosynthetic process (GO:0010557)	1860	45	22.58	+	1.99	1.14e-05	0.00189		regulation of response to stimulus (GO:0048583)	4275	18	7.68	+	2.34	0.000148	0.0245
tissue development (GO:0009888)	1762	43	21.39	+	2.01	1.26e-05	0.00206		response to steroid hormone (GO:0048545)	285	5	0.51	+	9.77	0.00016	0.0261
positive regulation of cell death (GO:0010942)	629	22	7.64	+	2.88	1.33e-05	0.00216		learning (GO:0007612)	152	4	0.27	+	14.65	0.000171	0.0277
response to endogenous stimulus (GO:0009719)	1417	37	17.2	+	2.15	1.4e-05	0.00224		response to purine-containing compound (GO:0014074)	154	4	0.28	+	14.46	0.00018	0.0285
cellular response to cytokine stimulus (GO:0071345)	1036	30	12.58	+	2.39	1.49e-05	0.00236		regulation of extrinsic apoptotic signaling pathway via death domain receptors (GO:1902041)	58	3	0.1	+	28.79	0.000178	0.0285
response to organic cyclic compound (GO:0014070)	889	27	10.79	+	2.5	1.62e-05	0.00255		apoptotic process (GO:0006915)	913	8	1.64	+	4.88	0.000186	0.0292
oxoacid metabolic process (GO:0043436)	985	29	11.96	+	2.43	1.72e-05	0.00267		response to transforming growth factor beta (GO:0071559)	156	4	0.28	+	14.27	0.000188	0.0293
positive regulation of cell motility (GO:2000147)	546	20	6.63	+	3.02	1.77e-05	0.00273		negative regulation of metabolic process (GO:0009892)	3149	15	5.66	+	2.65	0.00019	0.0293
blood vessel development (GO:0001568)	502	19	6.09	+	3.12	1.87e-05	0.00285		regulation of intracellular signal transduction (GO:1902531)	1779	11	3.2	+	3.44	0.000208	0.0306
cellular amino acid metabolic process (GO:0006520)	289	14	3.51	+	3.99	1.91e-05	0.00289		response to corticosteroid (GO:0031960)	161	4	0.29	+	13.83	0.000212	0.0306
response to mechanical stimulus (GO:0009612)	215	12	2.61	+	4.6	2.04e-05	0.00305		regulation of extrinsic apoptotic signaling pathway (GO:2001236)	160	4	0.29	+	13.92	0.000207	0.0307
negative regulation of phosphorylation (GO:0042326)	461	18	5.6	+	3.22	2.1e-05	0.00311		negative regulation of transcription by RNA polymerase II (GO:0000122)	924	8	1.66	+	4.82	0.000202	0.0308
negative regulation of protein phosphorylation (GO:0001933)	419	17	5.09	+	3.34	2.24e-05	0.0033		response to peptide (GO:1901652)	482	6	0.87	+	6.93	0.000212	0.0308
organic acid metabolic process (GO:0006082)	1006	29	12.21	+	2.37	2.27e-05	0.0033		regulation of protein metabolic process (GO:0051246)	2798	14	5.03	+	2.79	0.000206	0.0309
positive regulation of locomotion (GO:0040017)	561	20	6.81	+	2.94	2.57e-05	0.0037		regulation of interleukin-2 production (GO:0032663)	61	3	0.11	+	27.37	0.000205	0.031
regulation of cell motility (GO:2000145)	956	28	11.6	+	2.41	2.65e-05	0.00378		interspecies interaction between organisms (GO:0044419)	2125	12	3.82	+	3.14	0.00023	0.0329
multicellular organismal process (GO:0032501)	6972	117	84.63	+	1.38	2.84e-05	0.00402		cellular response to organic cyclic compound (GO:0071407)	502	6	0.9	+	6.65	0.000263	0.0372
primary metabolic process (GO:0044238)	7516	124	91.24	+	1.36	2.9e-05	0.00407		regulation of neuron death (GO:1901214)	321	5	0.58	+	8.67	0.000275	0.0386
response to hypoxia (GO:0001666)	343	15	4.16	+	3.6	3.02e-05	0.0042		L-serine metabolic process (GO:0006563)	12	2	0.02	+	92.77	0.000281	0.0388
regulation of phosphorus metabolic process (GO:0051174)	1833	43	22.25	+	1.93	3.16e-05	0.00429		negative regulation of nucleobase-containing compound metabolic process (GO:0045934)	1530	10	2.75	+	3.64	0.000281	0.039
positive regulation of transcription from RNA polymerase II promoter in response to stress (GO:0036003)	26	5	0.32	+	15.84	3.14e-05	0.00429		enzyme linked receptor protein signaling pathway (GO:0007167)	730	7	1.31	+	5.34	0.000291	0.0395
regulation of phosphate metabolic process (GO:0019220)	1832	43	22.24	+	1.93	3.13e-05	0.00432		ovulation cycle (GO:0042698)	69	3	0.12	+	24.2	0.000291	0.0398
regulation of protein phosphorylation (GO:0001932)	1463	37	17.76	+	2.08	3.28e-05	0.00441		developmental process (GO:0032502)	5757	21	10.34	+	2.03	0.000304	0.0409
chemical homeostasis (GO:0048878)	1127	31	13.68	+	2.27	3.35e-05	0.00446		regulation of translation, ncRNA-mediated (GO:0045974)	13	2	0.02	+	85.63	0.000324	0.0421
regulation of protein modification process (GO:0031399)	1879	44	22.81	+	1.93	3.52e-05	0.00461		miRNA mediated inhibition of translation (GO:0035278)	13	2	0.02	+	85.63	0.000324	0.0425
regulation of cellular component movement (GO:0051270)	1035	29	12.56	+	2.31	3.49e-05	0.00461		positive regulation of anion transmembrane transport (GO:1903961)	13	2	0.02	+	85.63	0.000324	0.0428
positive regulation of nucleobase-containing compound metabolic process (GO:0045935)	1896	44	23.02	+	1.91	3.84e-05	0.00499		negative regulation of transcription, DNA-templated (GO:0045892)	1269	9	2.28	+	3.95	0.000334	0.0431
positive regulation of neuron death (GO:1901216)	97	8	1.18	+	6.79	3.92e-05	0.00505		negative regulation of translation, ncRNA-mediated (GO:0040033)	13	2	0.02	+	85.63	0.000324	0.0432
response to decreased oxygen levels (GO:0036293)	355	15	4.31	+	3.48	4.4e-05	0.00563		cellular response to hormone stimulus (GO:0032870)	530	6	0.95	+	6.3	0.00035	0.0448
cellular response to reactive oxygen species (GO:0034614)	129	9	1.57	+	5.75	4.44e-05	0.00564		regulation of tissue remodeling (GO:0034103)	76	3	0.14	+	21.97	0.000382	0.0477
cell death (GO:0008219)	1083	30	13.15	+	2.28	4.49e-05	0.00565		cellular response to lipopolysaccharide (GO:0071222)	188	4	0.34	+	11.84	0.000378	0.0479
positive regulation of RNA metabolic process (GO:0051254)	1721	41	20.89	+	1.96	4.59e-05	0.00574		positive regulation of intracellular signal transduction (GO:1902533)	1016	8	1.83	+	4.38	0.000382	0.0481
protein metabolic process (GO:0019538)	4372	81	53.07	+	1.53	4.78e-05	0.00584
positive regulation of gene expression (GO:0010628)	2299	50	27.91	+	1.79	4.83e-05	0.00585
regulation of body fluid levels (GO:0050878)	492	18	5.97	+	3.01	4.76e-05	0.00586
regulation of locomotion (GO:0040012)	998	28	12.11	+	2.31	4.76e-05	0.00589
cell adhesion (GO:0007155)	945	27	11.47	+	2.35	5.15e-05	0.00619
regulated exocytosis (GO:0045055)	691	22	8.39	+	2.62	5.26e-05	0.00627
positive regulation of epithelial cell proliferation (GO:0050679)	202	11	2.45	+	4.49	5.57e-05	0.00659
biological adhesion (GO:0022610)	951	27	11.54	+	2.34	5.61e-05	0.00659
regulation of neuron death (GO:1901214)	321	14	3.9	+	3.59	5.72e-05	0.00667
cellular response to growth factor stimulus (GO:0071363)	500	18	6.07	+	2.97	5.81e-05	0.00673
positive regulation of biosynthetic process (GO:0009891)	1997	45	24.24	+	1.86	5.97e-05	0.00686
regulation of response to stimulus (GO:0048583)	4275	79	51.89	+	1.52	6.05e-05	0.00691
programmed cell death (GO:0012501)	1046	29	12.7	+	2.28	6.4e-05	0.0072
organonitrogen compound biosynthetic process (GO:1901566)	1388	35	16.85	+	2.08	6.44e-05	0.0072
regulation of angiogenesis (GO:0045765)	283	13	3.44	+	3.78	6.38e-05	0.00722
blood vessel morphogenesis (GO:0048514)	415	16	5.04	+	3.18	7e-05	0.00777
regulation of vasculature development (GO:1901342)	286	13	3.47	+	3.74	7.06e-05	0.00778
positive regulation of apoptotic process (GO:0043065)	560	19	6.8	+	2.8	7.75e-05	0.00848
myeloid leukocyte mediated immunity (GO:0002444)	514	18	6.24	+	2.88	8.16e-05	0.00887
regulation of anatomical structure morphogenesis (GO:0022603)	977	27	11.86	+	2.28	8.25e-05	0.00891
blood coagulation (GO:0007596)	291	13	3.53	+	3.68	8.35e-05	0.00895
positive regulation of cellular biosynthetic process (GO:0031328)	1965	44	23.85	+	1.84	8.44e-05	0.00899
small molecule metabolic process (GO:0044281)	1728	40	20.98	+	1.91	8.6e-05	0.00909
response to nitrogen compound (GO:1901698)	1083	29	13.15	+	2.21	8.81e-05	0.00919
cellular response to endogenous stimulus (GO:0071495)	1146	30	13.91	+	2.16	8.75e-05	0.00919
positive regulation of transcription, DNA-templated (GO:0045893)	1541	37	18.71	+	1.98	8.94e-05	0.00921
coagulation (GO:0050817)	293	13	3.56	+	3.66	8.92e-05	0.00924
positive regulation of programmed cell death (GO:0043068)	568	19	6.89	+	2.76	9.28e-05	0.0095
response to external stimulus (GO:0009605)	2532	53	30.74	+	1.72	9.41e-05	0.00957
regulation of cell population proliferation (GO:0042127)	1666	39	20.22	+	1.93	9.83e-05	0.00969
hemostasis (GO:0007599)	296	13	3.59	+	3.62	9.83e-05	0.00975
circulatory system development (GO:0072359)	871	25	10.57	+	2.36	9.8e-05	0.00978
negative regulation of protein modification process (GO:0031400)	620	20	7.53	+	2.66	9.77e-05	0.00981
secretion (GO:0046903)	1092	29	13.26	+	2.19	9.74e-05	0.00985
intracellular signal transduction (GO:0035556)	1680	39	20.39	+	1.91	0.000108	0.0105
homotypic cell-cell adhesion (GO:0034109)	57	6	0.69	+	8.67	0.000107	0.0105
neutrophil degranulation (GO:0043312)	482	17	5.85	+	2.91	0.000119	0.0114
negative regulation of phosphate metabolic process (GO:0045936)	579	19	7.03	+	2.7	0.000118	0.0114
negative regulation of phosphorus metabolic process (GO:0010563)	580	19	7.04	+	2.7	0.000121	0.0115
positive regulation of transcription by RNA polymerase II (GO:0045944)	1214	31	14.74	+	2.1	0.000122	0.0115
response to drug (GO:0042493)	392	15	4.76	+	3.15	0.000128	0.012
neutrophil activation involved in immune response (GO:0002283)	486	17	5.9	+	2.88	0.00013	0.0122
myeloid leukocyte activation (GO:0002274)	584	19	7.09	+	2.68	0.000131	0.0123
cell-substrate adhesion (GO:0031589)	186	10	2.26	+	4.43	0.000134	0.0123
regulation of epithelial cell proliferation (GO:0050678)	349	14	4.24	+	3.3	0.000134	0.0124
negative regulation of cellular metabolic process (GO:0031324)	2652	54	32.19	+	1.68	0.000135	0.0124
regulation of cellular metabolic process (GO:0031323)	6275	105	76.17	+	1.38	0.000136	0.0124
regulation of cellular amine metabolic process (GO:0033238)	87	7	1.06	+	6.63	0.000138	0.0125
biosynthetic process (GO:0009058)	2837	57	34.44	+	1.66	0.000139	0.0126
cellular protein metabolic process (GO:0044267)	3789	71	45.99	+	1.54	0.000147	0.0132
neutrophil mediated immunity (GO:0002446)	493	17	5.98	+	2.84	0.000154	0.0137
neuron projection development (GO:0031175)	695	21	8.44	+	2.49	0.000158	0.0139
neutrophil activation (GO:0042119)	494	17	6	+	2.83	0.000157	0.0139
cellular macromolecule metabolic process (GO:0044260)	5098	89	61.88	+	1.44	0.00016	0.0141
exocytosis (GO:0006887)	787	23	9.55	+	2.41	0.00017	0.0149
granulocyte activation (GO:0036230)	498	17	6.05	+	2.81	0.000173	0.015
cytokine-mediated signaling pathway (GO:0019221)	701	21	8.51	+	2.47	0.000177	0.0153
positive regulation of protein metabolic process (GO:0051247)	1703	39	20.67	+	1.89	0.000187	0.016
post-translational protein modification (GO:0043687)	361	14	4.38	+	3.19	0.000187	0.0161
export from cell (GO:0140352)	1024	27	12.43	+	2.17	0.000198	0.0167
leukocyte degranulation (GO:0043299)	504	17	6.12	+	2.78	0.000198	0.0168
positive regulation of phosphoprotein phosphatase activity (GO:0032516)	21	4	0.25	+	15.69	0.00021	0.0176
angiogenesis (GO:0001525)	323	13	3.92	+	3.32	0.000224	0.0187
response to toxic substance (GO:0009636)	239	11	2.9	+	3.79	0.000229	0.019
positive regulation of nucleic acid-templated transcription (GO:1903508)	1626	37	19.74	+	1.87	0.000235	0.0194
positive regulation of RNA biosynthetic process (GO:1902680)	1627	37	19.75	+	1.87	0.000237	0.0195
response to hormone (GO:0009725)	816	23	9.91	+	2.32	0.000239	0.0195
regulation of cellular amino acid metabolic process (GO:0006521)	67	6	0.81	+	7.38	0.000244	0.0198
secretion by cell (GO:0032940)	976	26	11.85	+	2.19	0.000246	0.0199
aging (GO:0007568)	283	12	3.44	+	3.49	0.000248	0.0199
cell communication (GO:0007154)	5595	95	67.92	+	1.4	0.000251	0.0201
organic substance biosynthetic process (GO:1901576)	2775	55	33.69	+	1.63	0.000258	0.0205
eye development (GO:0001654)	373	14	4.53	+	3.09	0.000258	0.0206
regulation of cellular protein localization (GO:1903827)	567	18	6.88	+	2.62	0.000264	0.0207
regulation of leukocyte differentiation (GO:1902105)	285	12	3.46	+	3.47	0.000263	0.0208
glial cell migration (GO:0008347)	43	5	0.52	+	9.58	0.000268	0.0209
regulation of response to stress (GO:0080134)	1566	36	19.01	+	1.89	0.000274	0.0212
myeloid cell activation involved in immune response (GO:0002275)	519	17	6.3	+	2.7	0.000275	0.0212
regulation of metabolic process (GO:0019222)	6989	113	84.84	+	1.33	0.000273	0.0212
visual system development (GO:0150063)	377	14	4.58	+	3.06	0.000287	0.022
sensory organ development (GO:0007423)	572	18	6.94	+	2.59	0.000292	0.0223
transport (GO:0006810)	4543	80	55.15	+	1.45	0.0003	0.0228
response to organonitrogen compound (GO:0010243)	997	26	12.1	+	2.15	0.000305	0.0231
cell activation involved in immune response (GO:0002263)	626	19	7.6	+	2.5	0.000308	0.0232
regulation of nitrogen compound metabolic process (GO:0051171)	5869	98	71.24	+	1.38	0.000312	0.0234
regulation of cellular process (GO:0050794)	11345	166	137.72	+	1.21	0.000327	0.0242
positive regulation of protein dephosphorylation (GO:0035307)	45	5	0.55	+	9.15	0.000325	0.0242
regulation of molecular function (GO:0065009)	3067	59	37.23	+	1.58	0.000327	0.0243
sensory system development (GO:0048880)	383	14	4.65	+	3.01	0.000334	0.0245
negative regulation of signal transduction (GO:0009968)	1290	31	15.66	+	1.98	0.000339	0.0248
smooth muscle cell migration (GO:0014909)	9	3	0.11	+	27.46	0.000346	0.0251
muscle system process (GO:0003012)	294	12	3.57	+	3.36	0.000345	0.0251
regulation of ERK1 and ERK2 cascade (GO:0070372)	295	12	3.58	+	3.35	0.000355	0.0256
ion homeostasis (GO:0050801)	786	22	9.54	+	2.31	0.000359	0.0258
regulation of cell adhesion (GO:0030155)	721	21	8.75	+	2.4	0.000366	0.026
regulation of primary metabolic process (GO:0080090)	6057	100	73.53	+	1.36	0.000364	0.026
regulation of intracellular signal transduction (GO:1902531)	1779	39	21.6	+	1.81	0.000397	0.0281
skeletal system development (GO:0001501)	488	16	5.92	+	2.7	0.000411	0.0289
regulation of DNA-binding transcription factor activity (GO:0051090)	439	15	5.33	+	2.81	0.000411	0.029
establishment of localization in cell (GO:0051649)	2367	48	28.73	+	1.67	0.000444	0.0303
negative regulation of developmental process (GO:0051093)	887	24	10.77	+	2.23	0.000434	0.0304
cell surface receptor signaling pathway (GO:0007166)	2510	50	30.47	+	1.64	0.000442	0.0304
regulation of cytokine production (GO:0001817)	739	21	8.97	+	2.34	0.000439	0.0304
cellular homeostasis (GO:0019725)	890	24	10.8	+	2.22	0.000442	0.0305
anatomical structure formation involved in morphogenesis (GO:0048646)	889	24	10.79	+	2.22	0.000439	0.0306
carboxylic acid metabolic process (GO:0019752)	893	24	10.84	+	2.21	0.00045	0.0307
glial cell differentiation (GO:0010001)	180	9	2.18	+	4.12	0.000478	0.032
establishment of localization (GO:0051234)	4683	81	56.85	+	1.42	0.000473	0.032
negative regulation of macromolecule metabolic process (GO:0010605)	2902	56	35.23	+	1.59	0.000478	0.0321
regulation of biological process (GO:0050789)	11904	172	144.5	+	1.19	0.000478	0.0323
regulation of localization (GO:0032879)	2771	54	33.64	+	1.61	0.000524	0.0349
epithelial tube morphogenesis (GO:0060562)	309	12	3.75	+	3.2	0.000529	0.0351
negative regulation of nitrogen compound metabolic process (GO:0051172)	2447	49	29.7	+	1.65	0.000536	0.0354
positive regulation of cellular protein metabolic process (GO:0032270)	1625	36	19.73	+	1.83	0.000555	0.0362
head development (GO:0060322)	817	22	9.92	+	2.22	0.00055	0.0362
negative regulation of metabolic process (GO:0009892)	3149	59	38.23	+	1.54	0.000559	0.0363
posttranscriptional regulation of gene expression (GO:0010608)	553	17	6.71	+	2.53	0.000554	0.0364
cell projection organization (GO:0030030)	1197	29	14.53	+	2	0.000566	0.0367
regulation of apoptotic signaling pathway (GO:2001233)	359	13	4.36	+	2.98	0.00059	0.0381
negative regulation of intracellular signal transduction (GO:1902532)	507	16	6.15	+	2.6	0.000613	0.0394
negative regulation of cell death (GO:0060548)	1025	26	12.44	+	2.09	0.000626	0.04
leukocyte activation (GO:0045321)	931	24	11.3	+	2.12	0.000629	0.0401
cellular biosynthetic process (GO:0044249)	2680	52	32.53	+	1.6	0.000635	0.0403
biological regulation (GO:0065007)	12575	179	152.65	+	1.17	0.000658	0.0416
macromolecule metabolic process (GO:0043170)	6280	102	76.23	+	1.34	0.000683	0.043
neural crest cell migration (GO:0001755)	54	5	0.66	+	7.63	0.000704	0.0438
positive regulation of cell population proliferation (GO:0008284)	941	24	11.42	+	2.1	0.000702	0.0438
signal transduction (GO:0007165)	5152	87	62.54	+	1.39	0.000699	0.0439
sulfur compound metabolic process (GO:0006790)	367	13	4.45	+	2.92	0.000719	0.0445
regulation of immune system process (GO:0002682)	1705	37	20.7	+	1.79	0.000732	0.045
response to lipopolysaccharide (GO:0032496)	321	12	3.9	+	3.08	0.00073	0.0451
response to fibroblast growth factor (GO:0071774)	117	7	1.42	+	4.93	0.000751	0.046
plasma membrane bounded cell projection organization (GO:0120036)	1151	28	13.97	+	2	0.000756	0.0461
camera-type eye development (GO:0043010)	323	12	3.92	+	3.06	0.000769	0.0468
regulation of vascular endothelial growth factor receptor signaling pathway (GO:0030947)	31	4	0.38	+	10.63	0.00079	0.0478
positive regulation of phosphate metabolic process (GO:0045937)	1163	28	14.12	+	1.98	0.000798	0.0479
positive regulation of phosphorus metabolic process (GO:0010562)	1163	28	14.12	+	1.98	0.000798	0.0481
