# Supplementary material for: Modelling the impact of decidual senescence on embryo implantation in human endometrial assembloids
Source: eLife. 2021 Sep 6;10:e69603. doi: 10.7554/eLife.69603 (PMC8523170; doi:10.7554/eLife.69603)
Supplement: Figure 5—source data 3. — Secreted levels of key senescent (CXCL8) and decidual stromal cell markers (CXCL14, IL-15, TIMP3) (pg/ml) were examined by ELISA in spent medium from assembloids treated with or without dasatinib. Supports Figure 5D. [file elife-69603-fig5-data3.xlsx]

## Sheet: Figure 5-Source Data 3
Figure 5-Source Data 3 - ELISA Data
Supports Figure 5D
Secreted levels of key senescent (CXCL8) and decidual stromal cell markers (CXCL14, IL-15, TIMP3) (pg/ml) were examined by ELISA in spent medium from assembloids treated with or without dasatinib.
Analyte	Day	Dasatinib	Biological replicates (pg/ml)
CXCL8	0	-	12538.8	5091.98	6424.74	15353.6
	2	-	34965.4	19864.2	26793.1	23972
	4	-	5734.64	3682.62	7660.58	13138.3
	0	+	12538.8	5091.98	6424.74	15353.6
	2	+	8857.26	2553.94	4718.62	12289.5
	4	+	2493.48	217.5	134.1	258.86
CXCL14	0	-	189.903	217.204	57.032	105.743
	2	-	143.53	178.64	114.064	161.728
	4	-	1320.06	893.2	570.32	1350.51
	0	+	189.903	217.204	57.032	105.743
	2	+	492.994	474.008	182.574	264.012
	4	+	2265.12	1320.06	1864.66	1782.74
IL-15	0	-	0	0	0	0
	2	-	0	0.074	0	1.058
	4	-	3.399	5.495	7.062	3.709
	0	+	0	0	0	0
	2	+	0	1.39	0.941	3.189
	4	+	4.481	7.566	12.85	17.896
TIMP3	0	-	423.05	793.15	470.32	214.08
	2	-	2946.75	3235.9	4394.4	3355.8
	4	-	3654.2	4958.8	3806.7	2312.6
	0	+	423.05	793.15	470.32	214.08
	2	+	5322.3	2229.55	8506.65	2951.7
	4	+	6785.9	9958.7	11561.5	8688.5
