# Supplementary material for: Modelling the impact of decidual senescence on embryo implantation in human endometrial assembloids
Source: eLife. 2021 Sep 6;10:e69603. doi: 10.7554/eLife.69603 (PMC8523170; doi:10.7554/eLife.69603)
Supplement: Figure 6—source data 1. — Embryo diameters were measured over 72 hr co-culture with assembloids previously differentiated with or without dasatinib. Images were captured using time-lapse imaging. Supports Figure 6D. [file elife-69603-fig6-data1.xlsx]

## Sheet: Figure 6-Source Data 1
Figure 6-Source Data 1: Embryo Expansion Measurement
Supports Figure 6D
Embryo diameters were measured over 72 hours co-culture with assembloids previously differentiated with or without dasatinib. Images were captured using time-lapse imaging.
Time (h)	Pre-treatment	Biological replicates (μm)
0	MDM	120.593	137.285	146.632	130.345	129.86
4		136.072	104.798	162.896	151.769	142.846
8		183.735	132.476	187.35	162.986	159.078
12		122.924	144.3	126.208	202.822	207.775
16		159.72	171.815	147.233	171.127	129.048
20		121.234	180.497	121.96	205.566	173.687
24		158.887	193.98	174.454	235.747	137.164
28		207.653	160.732	149.617	265.176	193.427
32		168.872	194.132	216.413	266.7	145.02
36		207.422	157.466	228.313	261.537	123.367
40		245.728	180.272	258.433	287.987	229.689
44		273.28	229.68	278.423	288.371	147.715
48		267.169	245.997	272.847	255.391	138.787
52		271.833	180.497	263.852	309.847	138.787
56		262.465	216.378	290.193	337.614	130.671
60		263.698	252.08	300.488	339.899	137.976
64		258.832	279.321	318.852	367.069	145.28
68		299.899	164.024	362.959	402.919	181.803
72		312.04	226.661	371.112	383.421	200.05
0	MDM + Dasatinib	141.177	131.134	134.793	168.817
4		182.406	150.599	171.062	202.906
8		117.528	160.204	184.556	239.429
12		186.778	196.622	203.204	222.675
16		187.881	148.132	194.662	254.038
20		217.347	143.686	185.333	272.705
24		151.259	160.342	137.393	221.052
28		185.73	155.583	156.456	247.545
32		145.217	173.692	115.185	192.355
36		119.58	124.592	145.014	153.397
40		105.917	146.204	114.06	168.006
44		113.412	143.891	92.3077	188.296
48		124.592	125.27	92.6661	141.222
52		98.3765	144.275	103.915	133.918
56		106.454	136.64	117.779	127.425
60		94.8281	117.623	105.638	132.294
64		106.472	124.562	128.78	120.12
68		95.0226	121.567	132.587	121.743
72		100.599	117.873	140.469	135.541
