# Supplementary material for: Modelling the impact of decidual senescence on embryo implantation in human endometrial assembloids
Source: eLife. 2021 Sep 6;10:e69603. doi: 10.7554/eLife.69603 (PMC8523170; doi:10.7554/eLife.69603)
Supplement: Figure 6—source data 2. — Secreted levels of hCG (pg/ml) by embryos in co-culture with assembloids previously differentiated with or without dasatinib were examined by ELISA in spent medium. Supports Figure 6F. [file elife-69603-fig6-data2.xlsx]

## Sheet: Figure 6-Source Data 2
Figure 6-Source Data 2: Embryo hCG secretion
Supports Figure 6F
Secreted levels of hCG (pg/ml) by embryos in co-culture with assembloids previously differentiated with or without dasatinib were examined by ELISA in spent medium.
Analyte	Day	Dasatinib	Embryo	Biological replicates (pg/ml)
HCG	0	-	-	0	0	0	0	0	7.31119
	3	-	+	136.248	175.836	125.54	140.204	142.824	161.421
	0	+	-	0	0	0	0	5.43221
	3	+	+	137.46	150.588	111.78	110.648	130.157
	0	-	-	0
	3	-	-	0
